# Supplementary material for: Predictive Bioactivity Modeling and Structural Binding Analysis for the Identification of Potential SMYD3 Modulators
Source: Research Square preprint supplement (doi:10.21203/rs.3.rs-8662415/v1), 2026-01-28
Supplement: Supplementary file 1 [file fd1b6fc6bd92028e596af053.xlsx]

## Sheet: Table S1
Molecule	ChEMBL	ID	Molecule Name	Molecule Max Phase	Molecular Weight	#RO5 Violations	AlogP	Compound Key	Smiles	Standard Type	Standard Relation	Standard Value	Standard Units	pChEMBL Value	Data Validity Comment	Comment	Uo Units	Ligand Efficiency BEI	Ligand Efficiency LE	Ligand Efficiency LLE	Ligand Efficiency SEI	Potential Duplicate	Assay ChEMBL ID	Assay Description	Assay Type	BAO Format ID	BAO Label	Assay Organism	Assay Tissue ChEMBL ID	Assay Tissue Name	Assay Cell Type	Assay Subcellular Fraction	Assay Parameters	Assay Variant Accession	Assay Variant Mutation	Target ChEMBL ID	Target Name	Target Organism	Target Type	Document ChEMBL ID	Source ID	Source Description	Document Journal	Document Year	Cell ChEMBL ID	Properties	Action Type	Standard Text Value	Value
CHEMBL6007072		None	250.3	0	0.48	BDBM378253	COc1cnc(C(=O)N[C@H]2CC[C@H](N)CC2)cn1	IC50	'>'	100000	nM			756259	UO_0000065					0	CHEMBL5733491	SMYD3 Biochemical Assay: The assays were all performed in a buffer consisting of 25 mM Tris-Cl pH 8.0
CHEMBL6016507		None	308.36	0	0.73	BDBM378259	NCCC(=O)N[C@H]1CC[C@H](NC(=O)c2ccncc2F)CC1	IC50	'>'	100000	nM			756265	UO_0000065					0	CHEMBL5733491	SMYD3 Biochemical Assay: The assays were all performed in a buffer consisting of 25 mM Tris-Cl pH 8.0
CHEMBL6023903		None	235.29	0	0.79	BDBM378165	N[C@H]1CC[C@H](NC(=O)c2ccc(O)nc2)CC1	IC50	'>'	100000	nM			756171	UO_0000065					0	CHEMBL5733491	SMYD3 Biochemical Assay: The assays were all performed in a buffer consisting of 25 mM Tris-Cl pH 8.0
CHEMBL5912274		None	305.38	0	0.17	BDBM378257	NCCC(=O)N[C@H]1CC[C@H](NC(=O)c2ccc(N)nc2)CC1	IC50	'>'	100000	nM			756263	UO_0000065					0	CHEMBL5733491	SMYD3 Biochemical Assay: The assays were all performed in a buffer consisting of 25 mM Tris-Cl pH 8.0
CHEMBL5859678		None	235.29	0	0.06	BDBM378290	Nc1ncncc1C(=O)N[C@H]1CC[C@H](N)CC1	IC50	'>'	100000	nM			756296	UO_0000065					0	CHEMBL5733491	SMYD3 Biochemical Assay: The assays were all performed in a buffer consisting of 25 mM Tris-Cl pH 8.0
CHEMBL5785251		None	220.28	0	0.48	BDBM378168	N[C@H]1CC[C@H](NC(=O)c2cnccn2)CC1	IC50	'>'	100000	nM			756174	UO_0000065					0	CHEMBL5733491	SMYD3 Biochemical Assay: The assays were all performed in a buffer consisting of 25 mM Tris-Cl pH 8.0
CHEMBL3798488		None	420.54	0	0.7	4	O=C1Cc2cc(C(=O)NC3CCN(S(=O)(=O)CC4CCNCC4)CC3)ccc2N1	IC50	'='	70	nM	7.16			UO_0000065	17.01	0.34	6.45	6.65	0	CHEMBL3803119	Inhibition of full length N-terminal His-tagged SMYD3 (1 to 428 residues) (unknown origin) expressed in Escherichia coli using N-terminal GST-tagged MEKK2 as substrate preincubated for 30 mins followed by substrate addition by scintillation proximity assay in presence of [3H]SAM	B	BAO_0000019	assay format	Homo sapiens	None	None	None	None				CHEMBL2321643	Histone-lysine N-methyltransferase SMYD3	Homo sapiens	SINGLE PROTEIN	CHEMBL3797202	1	Scientific Literature	ACS Med Chem Lett	2016	None				70
CHEMBL5833872		None	300.45	0	3.28	BDBM377933	CC(CC(=O)NC(c1ccccc1)C1CCNCC1)C1CC1	IC50	'='	131220	nM		Outside typical range	755943	UO_0000065					0	CHEMBL5733491	SMYD3 Biochemical Assay: The assays were all performed in a buffer consisting of 25 mM Tris-Cl pH 8.0
CHEMBL5822993		None	288.35	0	1.05	BDBM377940	N[C@H]1CC[C@H](NC(=O)c2ccc3c(c2)NC(=O)CN3)CC1	IC50	'='	77470	nM	4.11		755950	UO_0000065	14.26	0.27	3.06	4.27	0	CHEMBL5733491	SMYD3 Biochemical Assay: The assays were all performed in a buffer consisting of 25 mM Tris-Cl pH 8.0
CHEMBL6018030		None	269.35	0	2.23	BDBM378069	N[C@H]1CC[C@H](NC(=O)c2nccc3ccccc23)CC1	IC50	'>'	100000	nM			756075	UO_0000065					0	CHEMBL5733491	SMYD3 Biochemical Assay: The assays were all performed in a buffer consisting of 25 mM Tris-Cl pH 8.0
CHEMBL5945867		None	321.4	0	1.26	BDBM378079	NCCC(=O)N[C@H]1CC[C@H](NC(=O)Cc2ccc(F)cc2)CC1	IC50	'>'	100000	nM			756085	UO_0000065					0	CHEMBL5733491	SMYD3 Biochemical Assay: The assays were all performed in a buffer consisting of 25 mM Tris-Cl pH 8.0
CHEMBL5748291		None	319.8	0	1.92	BDBM377997	N[C@H]1CC[C@H](NC(=O)c2cc(-n3cnnc3)ccc2Cl)CC1	IC50	'='	31990	nM	4.5		756005	UO_0000065	14.06	0.28	2.57	5.24	0	CHEMBL5733491	SMYD3 Biochemical Assay: The assays were all performed in a buffer consisting of 25 mM Tris-Cl pH 8.0
CHEMBL5811403		None	370.45	0	1.64	BDBM378097	CC(NC(=O)c1cc(O)c2ccccc2n1)C1CCN(C(=O)[C@H](C)N)CC1	IC50	'>'	100000	nM			756103	UO_0000065					0	CHEMBL5733491	SMYD3 Biochemical Assay: The assays were all performed in a buffer consisting of 25 mM Tris-Cl pH 8.0
CHEMBL6030526		None	370.46	0	0.97	BDBM378098	CC(NC(=O)c1ccc(-n2cnnc2)cc1)C1CCN(C(=O)[C@H](C)N)CC1	IC50	'>'	100000	nM			756104	UO_0000065					0	CHEMBL5733491	SMYD3 Biochemical Assay: The assays were all performed in a buffer consisting of 25 mM Tris-Cl pH 8.0
CHEMBL5960957		None	445.52	0	1.95	BDBM377921	N[C@@H](Cc1c[nH]c2ccccc12)C(=O)N1CCC(NC(=O)c2ccc3c(c2)CC(=O)N3)CC1	IC50	'='	690	nM	6.16		755931	UO_0000065	13.83	0.25	4.21	5.12	0	CHEMBL5733491	SMYD3 Biochemical Assay: The assays were all performed in a buffer consisting of 25 mM Tris-Cl pH 8.0
CHEMBL5830438		None	342.44	0	1.68	BDBM378116	Cn1c(C(=O)N[C@H]2CC[C@H](NC(=O)CCN)CC2)cc2ccccc21	IC50	'>'	100000	nM			756122	UO_0000065					0	CHEMBL5733491	SMYD3 Biochemical Assay: The assays were all performed in a buffer consisting of 25 mM Tris-Cl pH 8.0
CHEMBL5924602		None	219.29	0	1.08	BDBM378015	N[C@H]1CC[C@H](NC(=O)c2cccnc2)CC1	IC50	'>'	100000	nM			756021	UO_0000065					0	CHEMBL5733491	SMYD3 Biochemical Assay: The assays were all performed in a buffer consisting of 25 mM Tris-Cl pH 8.0
CHEMBL5915825		None	306.37	0	-0.44	BDBM378024	NCCC(=O)N[C@H]1CC[C@H](NC(=O)c2nccnc2N)CC1	IC50	'>'	100000	nM			756030	UO_0000065					0	CHEMBL5733491	SMYD3 Biochemical Assay: The assays were all performed in a buffer consisting of 25 mM Tris-Cl pH 8.0
CHEMBL5949845		None	322.38	0	0.92	BDBM378029	CC(NC(=O)c1cncc(F)c1)C1CCN(C(=O)[C@H](C)N)CC1	IC50	'>'	100000	nM			756035	UO_0000065					0	CHEMBL5733491	SMYD3 Biochemical Assay: The assays were all performed in a buffer consisting of 25 mM Tris-Cl pH 8.0
CHEMBL5769224		None	308.36	0	0.73	BDBM378030	NCCC(=O)N[C@H]1CC[C@H](NC(=O)c2cncc(F)c2)CC1	IC50	'>'	100000	nM			756036	UO_0000065					0	CHEMBL5733491	SMYD3 Biochemical Assay: The assays were all performed in a buffer consisting of 25 mM Tris-Cl pH 8.0
CHEMBL5768884		None	298.29	0	2.01	BDBM378177	N[C@H]1CC[C@H](NC(=O)c2cccc3c2OC(F)(F)O3)CC1	IC50	'>'	100000	nM			756183	UO_0000065					0	CHEMBL5733491	SMYD3 Biochemical Assay: The assays were all performed in a buffer consisting of 25 mM Tris-Cl pH 8.0
CHEMBL5878586		None	285.35	0	1.94	BDBM378198	N[C@H]1CC[C@H](NC(=O)c2cc(O)c3ccccc3n2)CC1	IC50	'>'	100000	nM			756204	UO_0000065					0	CHEMBL5733491	SMYD3 Biochemical Assay: The assays were all performed in a buffer consisting of 25 mM Tris-Cl pH 8.0
CHEMBL5991760		None	331.38	0	0.73	BDBM378202	NCCC(=O)N[C@H]1CC[C@H](NC(=O)c2ccc3nonc3c2)CC1	IC50	'>'	100000	nM			756208	UO_0000065					0	CHEMBL5733491	SMYD3 Biochemical Assay: The assays were all performed in a buffer consisting of 25 mM Tris-Cl pH 8.0
CHEMBL5074285		None	342.44	0	1.98	BDBM378212	Cc1cccc2cc(C(=O)N[C@H]3CC[C@H](NC(=O)CCN)CC3)[nH]c12	IC50	'='	37680	nM	4.42		756218	UO_0000065	12.92	0.24	2.44	4.42	0	CHEMBL5733491	SMYD3 Biochemical Assay: The assays were all performed in a buffer consisting of 25 mM Tris-Cl pH 8.0
CHEMBL6031790		None	250.3	0	0.48	BDBM378226	COc1cncc(C(=O)N[C@H]2CC[C@H](N)CC2)n1	IC50	'>'	100000	nM			756232	UO_0000065					0	CHEMBL5733491	SMYD3 Biochemical Assay: The assays were all performed in a buffer consisting of 25 mM Tris-Cl pH 8.0
CHEMBL5865151		None	268.31	0	1.89	BDBM378232	N[C@H]1CC[C@H](NC(=O)Cc2cc(F)cc(F)c2)CC1	IC50	'>'	100000	nM			756238	UO_0000065					0	CHEMBL5733491	SMYD3 Biochemical Assay: The assays were all performed in a buffer consisting of 25 mM Tris-Cl pH 8.0
CHEMBL5766705		None	329.4	0	1.07	BDBM378244	NCCC(=O)N[C@H]1CC[C@H](NC(=O)c2nc3ccccc3[nH]2)CC1	IC50	'='	86560	nM	4.06		756250	UO_0000065	12.33	0.23	2.99	3.6	0	CHEMBL5733491	SMYD3 Biochemical Assay: The assays were all performed in a buffer consisting of 25 mM Tris-Cl pH 8.0
CHEMBL5743626		None	320.39	0	0.49	BDBM378278	CC(NC(=O)c1cccnc1O)C1CCN(C(=O)[C@H](C)N)CC1	IC50	'='	70410	nM	4.15		756284	UO_0000065	12.96	0.25	3.66	3.83	0	CHEMBL5733491	SMYD3 Biochemical Assay: The assays were all performed in a buffer consisting of 25 mM Tris-Cl pH 8.0
CHEMBL6004952		None	293.37	0	-0.07	BDBM378283	Cn1nccc1C(=O)N[C@H]1CC[C@H](NC(=O)CCN)CC1	IC50	'>'	100000	nM			756289	UO_0000065					0	CHEMBL5733491	SMYD3 Biochemical Assay: The assays were all performed in a buffer consisting of 25 mM Tris-Cl pH 8.0
CHEMBL5976497		None	259.31	0	0.73	BDBM378316	N[C@H]1CC[C@H](NC(=O)c2cn3ncccc3n2)CC1	IC50	'>'	100000	nM			756322	UO_0000065					0	CHEMBL5733491	SMYD3 Biochemical Assay: The assays were all performed in a buffer consisting of 25 mM Tris-Cl pH 8.0
CHEMBL5978843		None	287.36	0	1.57	BDBM377945	N[C@H]1CC[C@H](NC(=O)c2ccc3c(c2)CCC(=O)N3)CC1	IC50	'='	65800	nM	4.18		755954	UO_0000065	14.55	0.27	2.61	4.97	0	CHEMBL5733491	SMYD3 Biochemical Assay: The assays were all performed in a buffer consisting of 25 mM Tris-Cl pH 8.0
CHEMBL5799434		None	298.39	0	2.18	BDBM377897	Cc1cc(C(=O)N[C@H]2CC[C@H](N)CC2)n(-c2ccccc2)n1	IC50	'='	110890	nM		Outside typical range	755909	UO_0000065					0	CHEMBL5733491	SMYD3 Biochemical Assay: The assays were all performed in a buffer consisting of 25 mM Tris-Cl pH 8.0
CHEMBL5747664		None	342.44	0	1.87	BDBM378104	CC(NC(=O)c1cc2ccccc2[nH]1)C1CCN(C(=O)[C@H](C)N)CC1	IC50	'>'	100000	nM			756110	UO_0000065					0	CHEMBL5733491	SMYD3 Biochemical Assay: The assays were all performed in a buffer consisting of 25 mM Tris-Cl pH 8.0
CHEMBL5799425		None	290.37	0	0.59	BDBM378011	NCCC(=O)N[C@H]1CC[C@H](NC(=O)c2ccncc2)CC1	IC50	'>'	100000	nM			756017	UO_0000065					0	CHEMBL5733491	SMYD3 Biochemical Assay: The assays were all performed in a buffer consisting of 25 mM Tris-Cl pH 8.0
CHEMBL5840045		None	405.85	0	3.06	BDBM378134	CC(NC(=O)c1ccc(Cl)cc1C(F)(F)F)C1CCN(C(=O)[C@H](C)N)CC1	IC50	'>'	100000	nM			756140	UO_0000065					0	CHEMBL5733491	SMYD3 Biochemical Assay: The assays were all performed in a buffer consisting of 25 mM Tris-Cl pH 8.0
CHEMBL6065532		None	322.38	0	0.92	BDBM378136	CC(NC(=O)c1cccc(F)n1)C1CCN(C(=O)[C@H](C)N)CC1	IC50	'>'	100000	nM			756142	UO_0000065					0	CHEMBL5733491	SMYD3 Biochemical Assay: The assays were all performed in a buffer consisting of 25 mM Tris-Cl pH 8.0
CHEMBL5907211		None	354.45	0	1.94	BDBM378043	CC(NC(=O)c1nccc2ccccc12)C1CCN(C(=O)[C@H](C)N)CC1	IC50	'>'	100000	nM			756049	UO_0000065					0	CHEMBL5733491	SMYD3 Biochemical Assay: The assays were all performed in a buffer consisting of 25 mM Tris-Cl pH 8.0
CHEMBL6019508		None	496.03	0	1.25	BDBM378471	CN1C(=O)Cc2cc(C(=O)N[C@H]3C[C@H]4CC[C@@H](C3)N4S(=O)(=O)N3CCC(N)CC3)c(Cl)cc21	IC50	'='	13.5	nM	7.87		756477	UO_0000065	15.87	0.33	6.62	6.78	0	CHEMBL5733491	SMYD3 Biochemical Assay: The assays were all performed in a buffer consisting of 25 mM Tris-Cl pH 8.0
CHEMBL6057774		None	343.47	0	2.31	BDBM378425	C[C@@H]1C[C@H](NC(=O)c2ccccc2)CCN1C(=O)C1CCC(N)CC1	IC50	'>'	10000	nM			756431	UO_0000065					0	CHEMBL5733491	SMYD3 Biochemical Assay: The assays were all performed in a buffer consisting of 25 mM Tris-Cl pH 8.0
CHEMBL5922142		None	274.32	0	0.58	BDBM378426	N[C@H]1CC[C@H](NC(=O)c2cc3c(cn2)NC(=O)C3)CC1	IC50	'='	3490	nM	5.46		756432	UO_0000065	19.89	0.37	4.88	5.62	0	CHEMBL5733491	SMYD3 Biochemical Assay: The assays were all performed in a buffer consisting of 25 mM Tris-Cl pH 8.0
CHEMBL5761480		None	343.47	0	2.31	BDBM378434	C[C@H]1C[C@@H](NC(=O)c2ccccc2)CCN1C(=O)C1CCC(N)CC1	IC50	'>'	10000	nM			756440	UO_0000065					0	CHEMBL5733491	SMYD3 Biochemical Assay: The assays were all performed in a buffer consisting of 25 mM Tris-Cl pH 8.0
CHEMBL3797749		None	482.01	0	1.23	BDBM378446	NC1CCN(S(=O)(=O)N2[C@@H]3CC[C@H]2C[C@@H](NC(=O)c2cc4c(cc2Cl)NC(=O)C4)C3)CC1	IC50	'='	0.81	nM	9.09		756452	UO_0000065	18.86	0.39	7.86	7.28	0	CHEMBL5733491	SMYD3 Biochemical Assay: The assays were all performed in a buffer consisting of 25 mM Tris-Cl pH 8.0
CHEMBL4746525		None	396.49	0	2.83	Chemical probe: BAY-6035; Compound 31	C[C@H]1CC(=O)Nc2cc(C(=O)NCCC3CC3)ccc2N1C(=O)N1CC2CC2C1	IC50						Not Active						0	CHEMBL5665282	Binding affinity to recombinant human SMYD3 expressed in Escherichia coli at varying 3H SAM substrate concentration of upto 3.5 uM with 10 fold Km concentration by scintillation proximity assay	B	BAO_0000019	assay format	Homo sapiens	None	None	None	None	EFO_ID: MONDO:0004992 | EFO_TERM: cancer			CHEMBL2321643	Histone-lysine N-methyltransferase SMYD3	Homo sapiens	SINGLE PROTEIN	CHEMBL5661986	72	Chemical Probe data from Scientific Literature	SLAS Discov	2021	None
CHEMBL5740077		None	259.31	0	0.73	BDBM378441	N[C@H]1CC[C@H](NC(=O)c2cnc3ncccn23)CC1	IC50	'>'	10000	nM			756447	UO_0000065					0	CHEMBL5733491	SMYD3 Biochemical Assay: The assays were all performed in a buffer consisting of 25 mM Tris-Cl pH 8.0
CHEMBL5922743		None	509.67	1	1.95	BDBM433195	COCCCN(C)C1CCN(S(=O)(=O)N2[C@@H]3CC[C@H]2C[C@@H](NC(=O)c2cc(C4CC4)on2)C3)CC1	IC50	'='	14.5	nM	7.84		878078	UO_0000065	15.38	0.31	5.89	7.24	0	CHEMBL5734901	SMYD3 Biochemical Assay: The assays were all performed in a buffer consisting of 25 mM Tris-Cl pH 8.0
CHEMBL6050512		None	438.59	0	2.24	BDBM433199	CC1CC(CS(=O)(=O)N2CC[C@H](NC(=O)c3cc(C4CC4)on3)C[C@@H]2C)CC(C)N1	IC50	'='	16.2	nM	7.79		878082	UO_0000065	17.76	0.35	5.55	7.45	0	CHEMBL5734901	SMYD3 Biochemical Assay: The assays were all performed in a buffer consisting of 25 mM Tris-Cl pH 8.0
CHEMBL5798109		None	534.73	1	2.01	BDBM433212	CN(CCN1CCCC1)C1CCN(S(=O)(=O)N2[C@@H]3CC[C@H]2C[C@@H](NC(=O)c2cc(C4CC4)on2)C3)CC1	IC50	'='	24.9	nM	7.6		878095	UO_0000065	14.22	0.28	5.59	7.44	0	CHEMBL5734901	SMYD3 Biochemical Assay: The assays were all performed in a buffer consisting of 25 mM Tris-Cl pH 8.0
CHEMBL5794613		None	519.59	1	2.53	BDBM433213	O=C(N[C@H]1C[C@H]2CC[C@@H](C1)N2S(=O)(=O)N1CCC(NCCC(F)(F)F)CC1)c1cc(C2CC2)on1	IC50	'='	25	nM	7.6		878096	UO_0000065	14.63	0.3	5.07	7.05	0	CHEMBL5734901	SMYD3 Biochemical Assay: The assays were all performed in a buffer consisting of 25 mM Tris-Cl pH 8.0
CHEMBL5766439		None	422.55	0	1.75	BDBM433214	O=C(N[C@H]1C[C@H]2CC[C@@H](C1)N2S(=O)(=O)C[C@@H]1CCCCN1)c1cc(C2CC2)on1	IC50	'='	25.4	nM	7.59		878097	UO_0000065	17.97	0.36	5.85	7.27	0	CHEMBL5734901	SMYD3 Biochemical Assay: The assays were all performed in a buffer consisting of 25 mM Tris-Cl pH 8.0
CHEMBL5958031		None	527.69	1	3.34	BDBM433218	C[C@@H](NC1CCN(S(=O)(=O)N2[C@@H]3CC[C@H]2C[C@@H](NC(=O)c2cc(C4CC4)on2)C3)CC1)c1ccccc1	IC50	'='	28.6	nM	7.54		878101	UO_0000065	14.3	0.28	4.2	7	0	CHEMBL5734901	SMYD3 Biochemical Assay: The assays were all performed in a buffer consisting of 25 mM Tris-Cl pH 8.0
CHEMBL5891628		None	513.66	1	2.47	BDBM433237	O=C(N[C@H]1C[C@H]2CC[C@@H](C1)N2S(=O)(=O)NC1CCN[C@H](Cc2ccccc2)C1)c1cc(C2CC2)on1	IC50	'='	48.1	nM	7.32		878120	UO_0000065	14.25	0.28	4.85	6.28	0	CHEMBL5734901	SMYD3 Biochemical Assay: The assays were all performed in a buffer consisting of 25 mM Tris-Cl pH 8.0
CHEMBL6000272		None	513.66	1	2.78	BDBM433243	O=C(N[C@H]1C[C@H]2CC[C@@H](C1)N2S(=O)(=O)NC1CCN(Cc2ccccc2)CC1)c1cc(C2CC2)on1	IC50	'='	52.4	nM	7.28		878126	UO_0000065	14.17	0.28	4.5	6.76	0	CHEMBL5734901	SMYD3 Biochemical Assay: The assays were all performed in a buffer consisting of 25 mM Tris-Cl pH 8.0
CHEMBL6022570		None	422.55	0	1.7	BDBM433247	CN1CCC[C@H](S(=O)(=O)N2[C@@H]3CC[C@H]2C[C@@H](NC(=O)c2cc(C4CC4)on2)C3)C1	IC50	'='	56.2	nM	7.25		878130	UO_0000065	17.16	0.34	5.55	7.57	0	CHEMBL5734901	SMYD3 Biochemical Assay: The assays were all performed in a buffer consisting of 25 mM Tris-Cl pH 8.0
CHEMBL5838601		None	436.58	0	2.09	BDBM433259	CN1CCCC[C@@H]1CS(=O)(=O)N1[C@@H]2CC[C@H]1C[C@@H](NC(=O)c1cc(C3CC3)on1)C2	IC50	'='	83	nM	7.08		878142	UO_0000065	16.22	0.32	4.99	7.4	0	CHEMBL5734901	SMYD3 Biochemical Assay: The assays were all performed in a buffer consisting of 25 mM Tris-Cl pH 8.0
CHEMBL5749480		None	421.56	0	3.19	BDBM433266	O=C(N[C@H]1C[C@H]2CC[C@@H](C1)N2S(=O)(=O)CC1CCCCC1)c1cc(C2CC2)on1	IC50	'='	90.8	nM	7.04		878149	UO_0000065	16.7	0.33	3.85	7.61	0	CHEMBL5734901	SMYD3 Biochemical Assay: The assays were all performed in a buffer consisting of 25 mM Tris-Cl pH 8.0
CHEMBL6021660		None	529.71	1	3.37	BDBM433267	C[C@H]1C[C@@H](NC(=O)c2cc(C3CC3)on2)CCN1S(=O)(=O)N1CCC(NC(C)(C)c2ccccc2)CC1	IC50	'='	93.3	nM	7.03		878150	UO_0000065	13.27	0.26	3.66	6.52	0	CHEMBL5734901	SMYD3 Biochemical Assay: The assays were all performed in a buffer consisting of 25 mM Tris-Cl pH 8.0
CHEMBL5919330		None	473.6	0	2.03	BDBM433279	C[C@H]1C[C@@H](NC(=O)c2cc(C3CC3)on2)CCN1S(=O)(=O)N1CCNC[C@@H]1c1ccccc1	IC50	'='	142	nM	6.85		878162	UO_0000065	14.46	0.28	4.82	6.35	0	CHEMBL5734901	SMYD3 Biochemical Assay: The assays were all performed in a buffer consisting of 25 mM Tris-Cl pH 8.0
CHEMBL5797389		None	410.54	0	1.61	BDBM433284	C[C@H]1C[C@@H](NC(=O)c2cc(C3CC3)on2)CCN1S(=O)(=O)CC1CCCCN1	IC50	'='	175	nM	6.76		878167	UO_0000065	16.46	0.33	5.15	6.46	0	CHEMBL5734901	SMYD3 Biochemical Assay: The assays were all performed in a buffer consisting of 25 mM Tris-Cl pH 8.0
CHEMBL6024627		None	421.52	0	0.57	BDBM433136	O=C(N[C@H]1C[C@H]2CC[C@@H](C1)N2S(=O)(=O)N1CC2CC1CN2)c1cc(C2CC2)on1	IC50	'='	5.01	nM	8.3		878019	UO_0000065	19.69	0.39	7.73	7.7	0	CHEMBL5734901	SMYD3 Biochemical Assay: The assays were all performed in a buffer consisting of 25 mM Tris-Cl pH 8.0
CHEMBL5998547		None	369.49	0	2.26	BDBM432647	CCCCS(=O)(=O)N1CC[C@@H](NC(=O)c2cc(C3CC3)on2)C[C@@H]1C	IC50	'='	8023	nM	5.1		877530	UO_0000065	13.79	0.28	2.84	5.51	0	CHEMBL5734901	SMYD3 Biochemical Assay: The assays were all performed in a buffer consisting of 25 mM Tris-Cl pH 8.0
CHEMBL5781564		None	451.59	0	1.55	BDBM433101	CN(C)C1CCN(S(=O)(=O)N2[C@@H]3CC[C@H]2C[C@@H](NC(=O)c2cc(C4CC4)on2)C3)CC1	IC50	'='	2.39	nM	8.62		877984	UO_0000065	19.09	0.38	7.07	8.71	0	CHEMBL5734901	SMYD3 Biochemical Assay: The assays were all performed in a buffer consisting of 25 mM Tris-Cl pH 8.0
CHEMBL5836468		None	424.57	0	1.81	BDBM433091	C[C@H]1C[C@@H](NC(=O)c2cc(C3CC3)on2)CCN1S(=O)(=O)CC[C@@H]1CCN(C)C1	IC50	'='	1.87	nM	8.73		877974	UO_0000065	20.56	0.41	6.92	9.12	0	CHEMBL5734901	SMYD3 Biochemical Assay: The assays were all performed in a buffer consisting of 25 mM Tris-Cl pH 8.0
CHEMBL5897805		None	421.52	0	0.41	BDBM433097	NC1C2CN(S(=O)(=O)N3[C@@H]4CC[C@H]3C[C@@H](NC(=O)c3cc(C5CC5)on3)C4)CC12	IC50	'='	2.19	nM	8.66		877980	UO_0000065	20.54	0.41	8.25	7.11	0	CHEMBL5734901	SMYD3 Biochemical Assay: The assays were all performed in a buffer consisting of 25 mM Tris-Cl pH 8.0
CHEMBL5987497		None	493.63	0	1.32	BDBM433250	COCCN1C2CCC1CN(S(=O)(=O)N1[C@@H]3CC[C@H]1C[C@@H](NC(=O)c1cc(C4CC4)on1)C3)C2	IC50	'='	59.2	nM	7.23		878133	UO_0000065	14.64	0.29	5.91	6.68	0	CHEMBL5734901	SMYD3 Biochemical Assay: The assays were all performed in a buffer consisting of 25 mM Tris-Cl pH 8.0
CHEMBL5844251		None	439.58	0	0.76	BDBM432896	CN(C)CCNCCS(=O)(=O)N1[C@@H]2CC[C@H]1C[C@@H](NC(=O)c1cc(C3CC3)on1)C2	IC50	'='	13.5	nM	7.87		877779	UO_0000065	17.9	0.36	7.11	7.3	0	CHEMBL5734901	SMYD3 Biochemical Assay: The assays were all performed in a buffer consisting of 25 mM Tris-Cl pH 8.0
CHEMBL5915786		None	384.5	0	1.06	BDBM432898	C[C@H]1CN(S(=O)(=O)CCCN)[C@@H](C)C[C@H]1NC(=O)c1cc(C2CC2)on1	IC50	'='	14.3	nM	7.84		877781	UO_0000065	20.4	0.41	6.78	6.62	0	CHEMBL5734901	SMYD3 Biochemical Assay: The assays were all performed in a buffer consisting of 25 mM Tris-Cl pH 8.0
CHEMBL5775604		None	468.62	0	1.42	BDBM432905	C[C@H]1CN(S(=O)(=O)CC2CCN(CCCO)CC2)CC[C@H]1NC(=O)c1cc(C2CC2)on1	IC50	'='	17.8	nM	7.75		877788	UO_0000065	16.54	0.33	6.33	6.68	0	CHEMBL5734901	SMYD3 Biochemical Assay: The assays were all performed in a buffer consisting of 25 mM Tris-Cl pH 8.0
CHEMBL5858712		None	348.45	0	1.79	BDBM432573	C[C@H]1C[C@H](NC(=O)c2cc(C3CC3)on2)CCN1C(=O)CCCCN	IC50	'='	7827	nM	5.11		877456	UO_0000065	14.65	0.28	3.32	5.03	0	CHEMBL5734901	SMYD3 Biochemical Assay: The assays were all performed in a buffer consisting of 25 mM Tris-Cl pH 8.0
CHEMBL6053550		None	393.47	0	1.26	BDBM432591	C[C@H]1C[C@H](NC(=O)c2cc(C3CC3)on2)CCN1S(=O)(=O)c1cn(C)cn1	IC50	'>'	10000	nM			877474	UO_0000065					0	CHEMBL5734901	SMYD3 Biochemical Assay: The assays were all performed in a buffer consisting of 25 mM Tris-Cl pH 8.0
CHEMBL6051362		None	524.36	1	2.15	BDBM432304	N[C@@H](Cc1ccc(O)c(I)c1)C(=O)N1CCC(NC(=O)c2cc(C3CC3)on2)CC1	IC50	'='	116	nM	6.94		877191	UO_0000065	13.23	0.32	4.79	5.7	0	CHEMBL5734901	SMYD3 Biochemical Assay: The assays were all performed in a buffer consisting of 25 mM Tris-Cl pH 8.0
CHEMBL5772233		None	449.56	0	2.6	BDBM432309	CN[C@@H](Cc1cn(C)c2ccccc12)C(=O)N1CCC(NC(=O)c2cc(C3CC3)on2)CC1	IC50	'='	1196	nM	5.92		877194	UO_0000065	13.17	0.25	3.32	6.41	0	CHEMBL5734901	SMYD3 Biochemical Assay: The assays were all performed in a buffer consisting of 25 mM Tris-Cl pH 8.0
CHEMBL5861583		None	384.48	0	2.02	BDBM432316	N[C@@H](Cc1ccc(O)cc1)CN1CCC(NC(=O)c2cc(C3CC3)on2)CC1	IC50	'='	4592	nM	5.34		877200	UO_0000065	13.88	0.26	3.32	5.1	0	CHEMBL5734901	SMYD3 Biochemical Assay: The assays were all performed in a buffer consisting of 25 mM Tris-Cl pH 8.0
CHEMBL5977914		None	332.4	0	1.01	BDBM432324	N[C@H]1C[C@@H](C(=O)N2CCC(NC(=O)c3cc(C4CC4)on3)CC2)C1	IC50	'='	5693	nM	5.25		877207	UO_0000065	15.78	0.3	4.23	5.17	0	CHEMBL5734901	SMYD3 Biochemical Assay: The assays were all performed in a buffer consisting of 25 mM Tris-Cl pH 8.0
CHEMBL5870388		None	346.43	0	1.4	BDBM432446	N[C@@H]1CC[C@@H](C(=O)N2CCC(NC(=O)c3cc(C4CC4)on3)CC2)C1	IC50	'='	5980	nM	5.22		877329	UO_0000065	15.08	0.29	3.82	5.15	0	CHEMBL5734901	SMYD3 Biochemical Assay: The assays were all performed in a buffer consisting of 25 mM Tris-Cl pH 8.0
CHEMBL5990965		None	432.52	0	1.58	BDBM432452	CCOC(=O)C1CN(C(=O)[C@H]2CC[C@H](N)CC2)CCC1NC(=O)c1cc(C2CC2)on1	IC50	'='	3539	nM	5.45		877335	UO_0000065	12.6	0.24	3.87	4.27	0	CHEMBL5734901	SMYD3 Biochemical Assay: The assays were all performed in a buffer consisting of 25 mM Tris-Cl pH 8.0
CHEMBL6049193		None	393.47	0	1.26	BDBM432529	C[C@H]1C[C@@H](NC(=O)c2cc(C3CC3)on2)CCN1S(=O)(=O)c1cn(C)cn1	IC50	'='	1243	nM	5.91		877417	UO_0000065	15.01	0.3	4.65	5.35	0	CHEMBL5734901	SMYD3 Biochemical Assay: The assays were all performed in a buffer consisting of 25 mM Tris-Cl pH 8.0
CHEMBL5939065		None	399.47	0	1.03	BDBM432552	CCOC(=O)CS(=O)(=O)N1CC[C@@H](NC(=O)c2cc(C3CC3)on2)C[C@H]1C	IC50	'>'	10000	nM			877435	UO_0000065					0	CHEMBL5734901	SMYD3 Biochemical Assay: The assays were all performed in a buffer consisting of 25 mM Tris-Cl pH 8.0
CHEMBL5972487		None	399.47	0	1.03	BDBM432545	CCOC(=O)CS(=O)(=O)N1CC[C@@H](NC(=O)c2cc(C3CC3)on2)C[C@@H]1C	IC50	'>'	10000	nM			877428	UO_0000065					0	CHEMBL5734901	SMYD3 Biochemical Assay: The assays were all performed in a buffer consisting of 25 mM Tris-Cl pH 8.0
CHEMBL6052993		None	376.46	0	0.63	BDBM432478	C[C@H]1CC(NC(=O)c2cc(C3CC3)on2)CCN1C(=O)C1CNCC(O)C1	IC50	'>'	10000	nM			877361	UO_0000065					0	CHEMBL5734901	SMYD3 Biochemical Assay: The assays were all performed in a buffer consisting of 25 mM Tris-Cl pH 8.0
CHEMBL5916310		None	374.49	0	2.05	BDBM432481	C[C@@H]1CC(NC(=O)c2cc(C3CC3)on2)CCN1C(=O)CCC1CCNC1	IC50	'='	953	nM	6.02		877364	UO_0000065	16.08	0.3	3.97	6.88	0	CHEMBL5734901	SMYD3 Biochemical Assay: The assays were all performed in a buffer consisting of 25 mM Tris-Cl pH 8.0
CHEMBL5769748		None	403.5	0	2.66	BDBM432486	C[C@@H]1C[C@@H](NC(=O)c2cc(C3CC3)on2)CCN1S(=O)(=O)Cc1ccccc1	IC50	'='	4306	nM	5.37		877369	UO_0000065	13.3	0.26	2.71	5.8	0	CHEMBL5734901	SMYD3 Biochemical Assay: The assays were all performed in a buffer consisting of 25 mM Tris-Cl pH 8.0
CHEMBL5882338		None	388.51	0	2.43	BDBM432491	CC[C@@H]1CN(C(=O)[C@H]2CC[C@H](N)CC2)CC[C@@H]1NC(=O)c1cc(C2CC2)on1	IC50	'='	352	nM	6.45		877374	UO_0000065	16.61	0.31	4.02	6.36	0	CHEMBL5734901	SMYD3 Biochemical Assay: The assays were all performed in a buffer consisting of 25 mM Tris-Cl pH 8.0
CHEMBL5888363		None	346.43	0	1.4	BDBM432499	NCCCC(=O)N1CCC(NC(=O)c2cc(C3CC3)on2)C2(CC2)C1	IC50	'='	830	nM	6.08		877382	UO_0000065	17.55	0.33	4.68	5.99	0	CHEMBL5734901	SMYD3 Biochemical Assay: The assays were all performed in a buffer consisting of 25 mM Tris-Cl pH 8.0
CHEMBL5760130		None	375.47	0	1.68	BDBM432501	C[C@H]1CC(NC(=O)c2cc(C3CC3)on2)CCN1C(=O)N1CCC(N)CC1	IC50	'='	2225	nM	5.65		877384	UO_0000065	15.05	0.29	3.97	5.4	0	CHEMBL5734901	SMYD3 Biochemical Assay: The assays were all performed in a buffer consisting of 25 mM Tris-Cl pH 8.0
CHEMBL5826424		None	388.51	0	2.43	BDBM432394	CC[C@H]1CN(C(=O)C2CCC(N)CC2)CC[C@@H]1NC(=O)c1cc(C2CC2)on1	IC50	'='	1615	nM	5.79		877277	UO_0000065	14.91	0.28	3.36	5.71	0	CHEMBL5734901	SMYD3 Biochemical Assay: The assays were all performed in a buffer consisting of 25 mM Tris-Cl pH 8.0
CHEMBL5794511		None	346.43	0	1.4	BDBM432398	C[C@@H]1CC(NC(=O)c2cc(C3CC3)on2)CCN1C(=O)[C@H]1C[C@H](N)C1	IC50	'='	779	nM	6.11		877281	UO_0000065	17.63	0.33	4.71	6.02	0	CHEMBL5734901	SMYD3 Biochemical Assay: The assays were all performed in a buffer consisting of 25 mM Tris-Cl pH 8.0
CHEMBL5746841		None	388.51	0	2.57	BDBM432411	CC[C@@H]1CC(NC(=O)c2cc(C3CC3)on2)CCN1C(=O)[C@H]1CC[C@H](N)CC1	IC50	'='	99.4	nM	7		877294	UO_0000065	18.02	0.34	4.43	6.9	0	CHEMBL5734901	SMYD3 Biochemical Assay: The assays were all performed in a buffer consisting of 25 mM Tris-Cl pH 8.0
CHEMBL6051686		None	432.52	0	1.45	BDBM432420	CCOC(=O)C1CN(C(=O)CC2CCNCC2)CCC1NC(=O)c1cc(C2CC2)on1	IC50	'='	2991	nM	5.52		877303	UO_0000065	12.77	0.24	4.07	4.86	0	CHEMBL5734901	SMYD3 Biochemical Assay: The assays were all performed in a buffer consisting of 25 mM Tris-Cl pH 8.0
CHEMBL5904308		None	386.5	0	2.19	BDBM432427	O=C(N[C@@H]1C[C@H]2CC[C@@H](C1)N2C(=O)CC1CCNCC1)c1cc(C2CC2)on1	IC50	'='	9856	nM	5.01		877310	UO_0000065	12.95	0.24	2.82	5.72	0	CHEMBL5734901	SMYD3 Biochemical Assay: The assays were all performed in a buffer consisting of 25 mM Tris-Cl pH 8.0
CHEMBL6049929		None	428.46	0	2.58	BDBM432604	N[C@H]1CC[C@H](C(=O)N2CCC(NC(=O)c3cc(C4CC4)on3)C(C(F)(F)F)C2)CC1	IC50	'='	2036	nM	5.69		877487	UO_0000065	13.28	0.26	3.11	5.61	0	CHEMBL5734901	SMYD3 Biochemical Assay: The assays were all performed in a buffer consisting of 25 mM Tris-Cl pH 8.0
CHEMBL5830992		None	388.51	0	2.3	BDBM432607	C[C@H](C(=O)N1CC[C@H](NC(=O)c2cc(C3CC3)on2)C[C@H]1C)C1CCNCC1	IC50	'='	928	nM	6.03		877490	UO_0000065	15.53	0.29	3.73	6.9	0	CHEMBL5734901	SMYD3 Biochemical Assay: The assays were all performed in a buffer consisting of 25 mM Tris-Cl pH 8.0
CHEMBL6045526		None	410.52	0	2.79	BDBM432614	C[C@@H]1C[C@H](NC(=O)c2cc(C3CC3)on2)CCN1C(=O)CC(CN)c1ccccc1	IC50	'='	4726	nM	5.33		877497	UO_0000065	12.97	0.24	2.54	5.25	0	CHEMBL5734901	SMYD3 Biochemical Assay: The assays were all performed in a buffer consisting of 25 mM Tris-Cl pH 8.0
CHEMBL5915256		None	404.49	0	2.06	BDBM432619	C[C@H]1C[C@@H](NC(=O)c2cc(C3CC3)on2)CCN1S(=O)(=O)Cc1cccnc1	IC50	'='	1427	nM	5.85		877502	UO_0000065	14.45	0.29	3.79	5.55	0	CHEMBL5734901	SMYD3 Biochemical Assay: The assays were all performed in a buffer consisting of 25 mM Tris-Cl pH 8.0
CHEMBL5988186		None	356.45	0	0.94	BDBM432628	C[C@@H]1C[C@H](NC(=O)c2cc(C3CC3)on2)CCN1S(=O)(=O)N(C)C	IC50	'='	6912	nM	5.16		877511	UO_0000065	14.48	0.29	4.22	5.39	0	CHEMBL5734901	SMYD3 Biochemical Assay: The assays were all performed in a buffer consisting of 25 mM Tris-Cl pH 8.0
CHEMBL5759796		None	410.52	0	2.62	BDBM432636	NCCCC(=O)N1CC[C@H](NC(=O)c2cc(C3CC3)on2)C[C@@H]1Cc1ccccc1	IC50	'='	54.1	nM	7.27		877519	UO_0000065	17.7	0.33	4.65	7.16	0	CHEMBL5734901	SMYD3 Biochemical Assay: The assays were all performed in a buffer consisting of 25 mM Tris-Cl pH 8.0
CHEMBL5834356		None	388.51	0	2.3	BDBM432506	CC1CNCCC1CC(=O)N1CCC(NC(=O)c2cc(C3CC3)on2)C[C@@H]1C	IC50	'='	1587	nM	5.8		877389	UO_0000065	14.93	0.28	3.5	6.63	0	CHEMBL5734901	SMYD3 Biochemical Assay: The assays were all performed in a buffer consisting of 25 mM Tris-Cl pH 8.0
CHEMBL6017238		None	353.44	0	1.63	BDBM432513	C[C@@H]1C[C@@H](NC(=O)c2cc(C3CC3)on2)CCN1S(=O)(=O)C1CC1	IC50	'>'	10000	nM			877396	UO_0000065					0	CHEMBL5734901	SMYD3 Biochemical Assay: The assays were all performed in a buffer consisting of 25 mM Tris-Cl pH 8.0
CHEMBL5931478		None	417.53	0	2.71	BDBM432530	C[C@H]1C[C@@H](NC(=O)c2cc(C3CC3)on2)CCN1S(=O)(=O)CCc1ccccc1	IC50	'='	472	nM	6.33		877413	UO_0000065	15.15	0.3	3.62	6.84	0	CHEMBL5734901	SMYD3 Biochemical Assay: The assays were all performed in a buffer consisting of 25 mM Tris-Cl pH 8.0
CHEMBL5799503		None	355.46	0	1.87	BDBM432538	CCCS(=O)(=O)N1CC[C@H](NC(=O)c2cc(C3CC3)on2)C[C@H]1C	IC50	'>'	10000	nM			877421	UO_0000065					0	CHEMBL5734901	SMYD3 Biochemical Assay: The assays were all performed in a buffer consisting of 25 mM Tris-Cl pH 8.0
CHEMBL5974752		None	386.5	0	2.18	BDBM432476	C[C@@H]1CC(NC(=O)c2cc(C3CC3)on2)CCN1C(=O)C1CC2(CC(N)C2)C1	IC50	'='	274	nM	6.56		877359	UO_0000065	16.98	0.32	4.38	6.47	0	CHEMBL5734901	SMYD3 Biochemical Assay: The assays were all performed in a buffer consisting of 25 mM Tris-Cl pH 8.0
CHEMBL5960773		None	360.46	0	1.66	BDBM432320	O=C(NC1CCN(C(=O)CC2CCNCC2)CC1)c1cc(C2CC2)on1	IC50	'='	1057	nM	5.98		877203	UO_0000065	16.58	0.31	4.32	6.83	0	CHEMBL5734901	SMYD3 Biochemical Assay: The assays were all performed in a buffer consisting of 25 mM Tris-Cl pH 8.0
CHEMBL5740891		None	332.4	0	1.01	BDBM432323	N[C@H]1C[C@H](C(=O)N2CCC(NC(=O)c3cc(C4CC4)on3)CC2)C1	IC50	'='	5775	nM	5.24		877206	UO_0000065	15.76	0.3	4.23	5.16	0	CHEMBL5734901	SMYD3 Biochemical Assay: The assays were all performed in a buffer consisting of 25 mM Tris-Cl pH 8.0
CHEMBL5896978		None	374.49	0	2.18	BDBM432360	C[C@H]1C[C@@H](NC(=O)c2cc(C3CC3)on2)CCN1C(=O)[C@H]1CC[C@H](N)CC1	IC50	'='	7970	nM	5.1		877243	UO_0000065	13.61	0.26	2.92	5.03	0	CHEMBL5734901	SMYD3 Biochemical Assay: The assays were all performed in a buffer consisting of 25 mM Tris-Cl pH 8.0
CHEMBL5938057		None	374.49	0	2.18	BDBM432361	C[C@H]1C[C@H](NC(=O)c2cc(C3CC3)on2)CCN1C(=O)[C@H]1CC[C@H](N)CC1	IC50	'='	1407	nM	5.85		877244	UO_0000065	15.63	0.3	3.67	5.77	0	CHEMBL5734901	SMYD3 Biochemical Assay: The assays were all performed in a buffer consisting of 25 mM Tris-Cl pH 8.0
CHEMBL5897698		None	595.48	1	2.27	BDBM432362	C[C@H](N)C(=O)NC[C@@H](Cc1ccc(O)c(I)c1)C(=O)N1CCC(NCc2cc(C3CC3)on2)CC1	IC50	'='	15298	nM	4.82		877245	UO_0000065	8.09	0.19	2.55	3.6	0	CHEMBL5734901	SMYD3 Biochemical Assay: The assays were all performed in a buffer consisting of 25 mM Tris-Cl pH 8.0
CHEMBL5940757		None	436.51	0	1.2	BDBM377953	CN1C(=O)Cc2cc(C(=O)NC3CCN(C(=O)[C@@H](N)Cc4ccc(O)cc4)CC3)ccc21	IC50	'='	8700	nM	5.06		755962	UO_0000065	11.59	0.22	3.86	4.36	0	CHEMBL5733491	SMYD3 Biochemical Assay: The assays were all performed in a buffer consisting of 25 mM Tris-Cl pH 8.0
CHEMBL5854109		None	275.31	0	1.12	BDBM377961	N[C@H]1CC[C@H](NC(=O)c2ccc3[nH]c(=O)oc3c2)CC1	IC50	'='	9760	nM	5.01		755970	UO_0000065	18.2	0.34	3.89	4.96	0	CHEMBL5733491	SMYD3 Biochemical Assay: The assays were all performed in a buffer consisting of 25 mM Tris-Cl pH 8.0
CHEMBL5855343		None	416.48	0	0.43	BDBM377975	CCOC(=O)C(NC(=O)c1ccc2c(c1)CC(=O)N2)C1CCN(C(=O)[C@H](C)N)CC1	IC50	'='	1510	nM	5.82		755984	UO_0000065	13.98	0.26	5.39	4.45	0	CHEMBL5733491	SMYD3 Biochemical Assay: The assays were all performed in a buffer consisting of 25 mM Tris-Cl pH 8.0
CHEMBL6046169		None	305.38	0	0.29	BDBM378087	Cc1cnc(C(=O)N[C@H]2CC[C@H](NC(=O)CCN)CC2)cn1	IC50	'>'	100000	nM			756093	UO_0000065					0	CHEMBL5733491	SMYD3 Biochemical Assay: The assays were all performed in a buffer consisting of 25 mM Tris-Cl pH 8.0
CHEMBL5948140		None	399.5	0	1.5	BDBM378090	CC1=NN(c2ccc(C(=O)NC(C)C3CCN(C(=O)[C@H](C)N)CC3)cc2)C(=O)C1	IC50	'='	76960	nM	4.11		756096	UO_0000065	10.3	0.19	2.61	3.81	0	CHEMBL5733491	SMYD3 Biochemical Assay: The assays were all performed in a buffer consisting of 25 mM Tris-Cl pH 8.0
CHEMBL5935040		None	385.47	0	1.75	BDBM378051	Cc1nc(-c2ccc(C(=O)NC(C)C3CCN(C(=O)[C@H](C)N)CC3)cc2)no1	IC50	'>'	100000	nM			756057	UO_0000065					0	CHEMBL5733491	SMYD3 Biochemical Assay: The assays were all performed in a buffer consisting of 25 mM Tris-Cl pH 8.0
CHEMBL5819443		None	319.41	0	0.37	BDBM378059	CC(NC(=O)c1ccnc(N)c1)C1CCN(C(=O)[C@H](C)N)CC1	IC50	'>'	100000	nM			756065	UO_0000065					0	CHEMBL5733491	SMYD3 Biochemical Assay: The assays were all performed in a buffer consisting of 25 mM Tris-Cl pH 8.0
CHEMBL5948964		None	340.43	0	1.74	BDBM378037	NCCC(=O)N[C@H]1CC[C@H](NC(=O)c2ccc3cnccc3c2)CC1	IC50	'='	15520	nM	4.81		756043	UO_0000065	14.13	0.26	3.07	4.95	0	CHEMBL5733491	SMYD3 Biochemical Assay: The assays were all performed in a buffer consisting of 25 mM Tris-Cl pH 8.0
CHEMBL6028962		None	220.28	0	0.48	BDBM378140	N[C@H]1CC[C@H](NC(=O)c2ncccn2)CC1	IC50	'>'	100000	nM			756146	UO_0000065					0	CHEMBL5733491	SMYD3 Biochemical Assay: The assays were all performed in a buffer consisting of 25 mM Tris-Cl pH 8.0
CHEMBL5841850		None	307.35	0	-0.31	BDBM378141	NCCC(=O)N[C@H]1CC[C@H](NC(=O)c2ccc(O)nn2)CC1	IC50	'>'	100000	nM			756147	UO_0000065					0	CHEMBL5733491	SMYD3 Biochemical Assay: The assays were all performed in a buffer consisting of 25 mM Tris-Cl pH 8.0
CHEMBL5755974		None	383.4	0	1.71	BDBM378154	CC(NC(=O)c1ccc2c(c1)OC(F)(F)O2)C1CCN(C(=O)[C@H](C)N)CC1	IC50	'>'	100000	nM			756160	UO_0000065					0	CHEMBL5733491	SMYD3 Biochemical Assay: The assays were all performed in a buffer consisting of 25 mM Tris-Cl pH 8.0
CHEMBL5857195		None	276.3	0	0.46	BDBM378156	N[C@H]1CC[C@H](NC(=O)c2ccc3c(c2)no[n+]3[O-])CC1	IC50	'>'	100000	nM			756162	UO_0000065					0	CHEMBL5733491	SMYD3 Biochemical Assay: The assays were all performed in a buffer consisting of 25 mM Tris-Cl pH 8.0
CHEMBL5878461		None	235.29	0	0.79	BDBM378162	N[C@H]1CC[C@H](NC(=O)c2ccnc(O)c2)CC1	IC50	'>'	100000	nM			756169	UO_0000065					0	CHEMBL5733491	SMYD3 Biochemical Assay: The assays were all performed in a buffer consisting of 25 mM Tris-Cl pH 8.0
CHEMBL6060015		None	402.48	0	1.62	BDBM377833	CC(=O)Nc1ccc(S(=O)(=O)N2CCC(NC(=O)c3cccnc3)CC2)cc1	IC50	'>'	100000	nM			755884	UO_0000065					0	CHEMBL5733491	SMYD3 Biochemical Assay: The assays were all performed in a buffer consisting of 25 mM Tris-Cl pH 8.0
CHEMBL5941307		None	371.44	0	1.5	BDBM377966	CC(NC(=O)c1ccc2oc(=O)ccc2c1)C1CCN(C(=O)[C@H](C)N)CC1	IC50	'='	149610	nM		Outside typical range	755975	UO_0000065					0	CHEMBL5733491	SMYD3 Biochemical Assay: The assays were all performed in a buffer consisting of 25 mM Tris-Cl pH 8.0
CHEMBL5824787		None	208.26	0	0.41	BDBM378371	N[C@H]1CC[C@H](NC(=O)c2ncc[nH]2)CC1	IC50	'>'	100000	nM			756377	UO_0000065					0	CHEMBL5733491	SMYD3 Biochemical Assay: The assays were all performed in a buffer consisting of 25 mM Tris-Cl pH 8.0
CHEMBL5882232		None	501.65	1	2.49	BDBM432911	C[C@H]1CN(S(=O)(=O)N2CCC(NCc3ccccc3)CC2)CC[C@H]1NC(=O)c1cc(C2CC2)on1	IC50	'='	21.2	nM	7.67		877794	UO_0000065	15.3	0.3	5.18	7.12	0	CHEMBL5734901	SMYD3 Biochemical Assay: The assays were all performed in a buffer consisting of 25 mM Tris-Cl pH 8.0
CHEMBL5797612		None	535.71	1	1.65	BDBM432916	O=C(N[C@H]1C[C@H]2CC[C@@H](C1)N2S(=O)(=O)CC1CCN(CCN2CCOCC2)CC1)c1cc(C2CC2)on1	IC50	'='	23.2	nM	7.63		877799	UO_0000065	14.25	0.28	5.98	7.05	0	CHEMBL5734901	SMYD3 Biochemical Assay: The assays were all performed in a buffer consisting of 25 mM Tris-Cl pH 8.0
CHEMBL5743014		None	424.57	0	1.66	BDBM432922	C[C@H]1CN(S(=O)(=O)CC2CCN(C)CC2)CC[C@H]1NC(=O)c1cc(C2CC2)on1	IC50	'='	25.3	nM	7.6		877805	UO_0000065	17.89	0.36	5.94	7.93	0	CHEMBL5734901	SMYD3 Biochemical Assay: The assays were all performed in a buffer consisting of 25 mM Tris-Cl pH 8.0
CHEMBL5903086		None	474.63	0	2.89	BDBM432925	C[C@H]1CN(S(=O)(=O)CCCNCc2ccccc2)[C@@H](C)C[C@H]1NC(=O)c1cc(C2CC2)on1	IC50	'='	27.3	nM	7.56		877808	UO_0000065	15.94	0.31	4.67	7.24	0	CHEMBL5734901	SMYD3 Biochemical Assay: The assays were all performed in a buffer consisting of 25 mM Tris-Cl pH 8.0
CHEMBL5832692		None	372.47	0	0.81	BDBM378335	CC(NC(=O)Cc1ccc2c(c1)CC(=O)N2)C1CCN(C(=O)[C@H](C)N)CC1	IC50	'='	60000	nM	4.22		756341	UO_0000065	11.33	0.21	3.41	4.04	0	CHEMBL5733491	SMYD3 Biochemical Assay: The assays were all performed in a buffer consisting of 25 mM Tris-Cl pH 8.0
CHEMBL5879593		None	287.32	0	0.82	BDBM378339	N[C@H]1CC[C@H](NC(=O)c2ccc3c(c2)C(=O)C(=O)N3)CC1	IC50	'='	7460	nM	5.13		756345	UO_0000065	17.85	0.33	4.31	5.06	0	CHEMBL5733491	SMYD3 Biochemical Assay: The assays were all performed in a buffer consisting of 25 mM Tris-Cl pH 8.0
CHEMBL5892493		None	356.43	0	0.77	BDBM378342	NCCC(=O)N[C@H]1CC[C@H](NC(=O)c2ccc(-n3cncn3)cc2)CC1	IC50	'='	53110	nM	4.28		756348	UO_0000065	11.99	0.22	3.5	3.72	0	CHEMBL5733491	SMYD3 Biochemical Assay: The assays were all performed in a buffer consisting of 25 mM Tris-Cl pH 8.0
CHEMBL5943577		None	235.29	0	0.79	BDBM378349	N[C@H]1CC[C@H](NC(=O)c2ncccc2O)CC1	IC50	'>'	100000	nM			756355	UO_0000065					0	CHEMBL5733491	SMYD3 Biochemical Assay: The assays were all performed in a buffer consisting of 25 mM Tris-Cl pH 8.0
CHEMBL5879557		None	250.3	0	0.95	BDBM378353	N[C@H]1CC[C@H](NC(=O)c2noc(C3CC3)n2)CC1	IC50	'='	85660	nM	4.07		756359	UO_0000065	16.25	0.31	3.12	4.32	0	CHEMBL5733491	SMYD3 Biochemical Assay: The assays were all performed in a buffer consisting of 25 mM Tris-Cl pH 8.0
CHEMBL5817958		None	236.28	0	0.18	BDBM378362	N[C@H]1CC[C@H](NC(=O)c2cncnc2O)CC1	IC50	'>'	50000	nM			756368	UO_0000065					0	CHEMBL5733491	SMYD3 Biochemical Assay: The assays were all performed in a buffer consisting of 25 mM Tris-Cl pH 8.0
CHEMBL5810120		None	266.3	0	-1.24	BDBM378370	NC(=O)Cn1cc(C(=O)N[C@H]2CC[C@H](N)CC2)nn1	IC50	'='	50000	nM	4.3		756376	UO_0000065	16.15	0.31	5.54	3.34	0	CHEMBL5733491	SMYD3 Biochemical Assay: The assays were all performed in a buffer consisting of 25 mM Tris-Cl pH 8.0
CHEMBL5631576		None	362.44	0	1.92	38	NCc1ccc(Nc2ncnc3cc(C(=O)NC4CCNC4)ccc23)cc1	IC50	'='	63000	nM	4.2			UO_0000065	11.59	0.21	2.28	4	0	CHEMBL5628408	Displacement of 3H-SAM from SMYD3 (unknown origin) using biotinylated-MAP3K2 as substrate incubated for 45 mins by SPA assay	B	BAO_0000357	single protein format	Homo sapiens	None	None	None	None				CHEMBL2321643	Histone-lysine N-methyltransferase SMYD3	Homo sapiens	SINGLE PROTEIN	CHEMBL5625232	1	Scientific Literature	Eur J Med Chem	2023	None	TIME = 0.75 hr	INHIBITOR		63
CHEMBL5665406		None	481.52	0	3.05	Compound 25	C[C@H]1CC(=O)Nc2cc(C(=O)NCCC3CC3)ccc2N1C(=O)N1CCN(CC(F)(F)F)CC1	IC50	'='	1510	nM	5.82			UO_0000065	12.09	0.23	2.77	6.85	0	CHEMBL5665262	Binding affinity to recombinant human SMYD3 expressed in Escherichia coli assessed as catalytic inhibition using DYDNPIFEKFGKGGTYPRRYHVSYHGK-Biotin as substrate by scintillation proximity assay	B	BAO_0000019	assay format	Homo sapiens	None	None	None	None	EFO_ID: MONDO:0004992 | EFO_TERM: cancer			CHEMBL2321643	Histone-lysine N-methyltransferase SMYD3	Homo sapiens	SINGLE PROTEIN	CHEMBL5661986	72	Chemical Probe data from Scientific Literature	SLAS Discov	2021	None		INHIBITOR		1.51
CHEMBL5665363		None	495.55	0	3.49	Compound 27	C[C@H]1CC(=O)Nc2cc(C(=O)NCCC3CC3)ccc2N1C(=O)N1CCC(NCC(F)(F)F)CC1	IC50	'='	1030	nM	5.99			UO_0000065	12.08	0.23	2.5	6.38	0	CHEMBL5665262	Binding affinity to recombinant human SMYD3 expressed in Escherichia coli assessed as catalytic inhibition using DYDNPIFEKFGKGGTYPRRYHVSYHGK-Biotin as substrate by scintillation proximity assay	B	BAO_0000019	assay format	Homo sapiens	None	None	None	None	EFO_ID: MONDO:0004992 | EFO_TERM: cancer			CHEMBL2321643	Histone-lysine N-methyltransferase SMYD3	Homo sapiens	SINGLE PROTEIN	CHEMBL5661986	72	Chemical Probe data from Scientific Literature	SLAS Discov	2021	None		INHIBITOR		1.03
CHEMBL5665431		None	443.55	0	1.48	Compound 28	C[C@H]1CC(=O)Nc2cc(C(=O)NCCC3CC3)ccc2N1C(=O)N1CCN(CCO)CC1	IC50	'='	1080	nM	5.97			UO_0000065	13.45	0.25	4.49	5.67	0	CHEMBL5665262	Binding affinity to recombinant human SMYD3 expressed in Escherichia coli assessed as catalytic inhibition using DYDNPIFEKFGKGGTYPRRYHVSYHGK-Biotin as substrate by scintillation proximity assay	B	BAO_0000019	assay format	Homo sapiens	None	None	None	None	EFO_ID: MONDO:0004992 | EFO_TERM: cancer			CHEMBL2321643	Histone-lysine N-methyltransferase SMYD3	Homo sapiens	SINGLE PROTEIN	CHEMBL5661986	72	Chemical Probe data from Scientific Literature	SLAS Discov	2021	None		INHIBITOR		1.08
CHEMBL5665439		None	410.52	0	3.17	BAY 444; Compound 34	C[C@@H]1CC(=O)Nc2cc(C(=O)N(C)CCC3CC3)ccc2N1C(=O)N1CC2CC2C1	IC50	'>'	100000	nM				UO_0000065					0	CHEMBL5665262	Binding affinity to recombinant human SMYD3 expressed in Escherichia coli assessed as catalytic inhibition using DYDNPIFEKFGKGGTYPRRYHVSYHGK-Biotin as substrate by scintillation proximity assay	B	BAO_0000019	assay format	Homo sapiens	None	None	None	None	EFO_ID: MONDO:0004992 | EFO_TERM: cancer			CHEMBL2321643	Histone-lysine N-methyltransferase SMYD3	Homo sapiens	SINGLE PROTEIN	CHEMBL5661986	72	Chemical Probe data from Scientific Literature	SLAS Discov	2021	None				1
CHEMBL5975473		None	410.52	0	3.04	BDBM432983	C[C@@H]1C[C@H](NC(=O)c2cc(C3CC3)on2)CCN1C(=O)c1ccc(CN(C)C)cc1	IC50	'='	129	nM	6.89		877866	UO_0000065	16.78	0.31	3.85	8.76	0	CHEMBL5734901	SMYD3 Biochemical Assay: The assays were all performed in a buffer consisting of 25 mM Tris-Cl pH 8.0
CHEMBL5966075		None	410.54	0	1.59	BDBM433080	C[C@H]1C[C@@H](NC(=O)c2cc(C3CC3)on2)CCN1S(=O)(=O)C[C@@H]1CC[C@@H](N)C1	IC50	'='	1.29	nM	8.89		877963	UO_0000065	21.65	0.43	7.3	7.5	0	CHEMBL5734901	SMYD3 Biochemical Assay: The assays were all performed in a buffer consisting of 25 mM Tris-Cl pH 8.0
CHEMBL5818034		None	436.58	0	2.14	BDBM433082	CN[C@H]1CC[C@H](S(=O)(=O)N2[C@@H]3CC[C@H]2C[C@@H](NC(=O)c2cc(C4CC4)on2)C3)CC1	IC50	'='	1.37	nM	8.86		877965	UO_0000065	20.3	0.4	6.72	8.48	0	CHEMBL5734901	SMYD3 Biochemical Assay: The assays were all performed in a buffer consisting of 25 mM Tris-Cl pH 8.0
CHEMBL6050000		None	430.53	0	2.24	BDBM433036	O=C(N[C@H]1C[C@H]2CC[C@@H](C1)N2S(=O)(=O)CCc1ccncc1)c1cc(C2CC2)on1	IC50	'='	491	nM	6.31		877919	UO_0000065	14.65	0.29	4.07	5.99	0	CHEMBL5734901	SMYD3 Biochemical Assay: The assays were all performed in a buffer consisting of 25 mM Tris-Cl pH 8.0
CHEMBL5824444		None	451.59	0	1.6	BDBM433100	C[C@H]1C[C@@H](NC(=O)c2cc(C3CC3)on2)CCN1S(=O)(=O)N1CCC2(CCCN2)CC1	IC50	'='	2.36	nM	8.63		877983	UO_0000065	19.1	0.38	7.03	8	0	CHEMBL5734901	SMYD3 Biochemical Assay: The assays were all performed in a buffer consisting of 25 mM Tris-Cl pH 8.0
CHEMBL5825460		None	410.54	0	1.46	BDBM433154	C[C@H]1C[C@@H](NC(=O)c2cc(C3CC3)on2)CCN1S(=O)(=O)CC[C@H]1CCNC1	IC50	'='	7.2	nM	8.14		878037	UO_0000065	19.83	0.4	6.68	7.79	0	CHEMBL5734901	SMYD3 Biochemical Assay: The assays were all performed in a buffer consisting of 25 mM Tris-Cl pH 8.0
CHEMBL6050264		None	535.71	1	1.84	BDBM433155	O=C(N[C@H]1C[C@H]2CC[C@@H](C1)N2S(=O)(=O)[C@H]1CC[C@H](NCCN2CCOCC2)CC1)c1cc(C2CC2)on1	IC50	'='	7.43	nM	8.13		878038	UO_0000065	15.17	0.3	6.29	6.95	0	CHEMBL5734901	SMYD3 Biochemical Assay: The assays were all performed in a buffer consisting of 25 mM Tris-Cl pH 8.0
CHEMBL5988532		None	539.7	1	2.91	BDBM433163	O=C(N[C@H]1C[C@H]2CC[C@@H](C1)N2S(=O)(=O)N1CC2CCC(C1)N2CCc1ccccc1)c1cc(C2CC2)on1	IC50	'='	8.67	nM	8.06		878046	UO_0000065	14.94	0.29	5.15	8.14	0	CHEMBL5734901	SMYD3 Biochemical Assay: The assays were all performed in a buffer consisting of 25 mM Tris-Cl pH 8.0
CHEMBL5805045		None	527.69	1	3.12	BDBM433176	CN(Cc1ccccc1)C1CCN(S(=O)(=O)N2[C@@H]3CC[C@H]2C[C@@H](NC(=O)c2cc(C4CC4)on2)C3)CC1	IC50	'='	10.8	nM	7.97		878059	UO_0000065	15.1	0.29	4.85	8.05	0	CHEMBL5734901	SMYD3 Biochemical Assay: The assays were all performed in a buffer consisting of 25 mM Tris-Cl pH 8.0
CHEMBL5926236		None	479.65	0	2.33	BDBM433185	CCN(CC)C1CCN(S(=O)(=O)N2[C@@H]3CC[C@H]2C[C@@H](NC(=O)c2cc(C4CC4)on2)C3)CC1	IC50	'='	12.7	nM	7.9		878068	UO_0000065	16.46	0.33	5.57	7.98	0	CHEMBL5734901	SMYD3 Biochemical Assay: The assays were all performed in a buffer consisting of 25 mM Tris-Cl pH 8.0
CHEMBL5926207		None	434.56	0	2.25	BDBM433187	O=C(N[C@H]1C[C@H]2CC[C@@H](C1)N2S(=O)(=O)N1CC2CC[C@@H](C2)C1)c1cc(C2CC2)on1	IC50	'='	13.3	nM	7.88		878070	UO_0000065	18.12	0.36	5.63	8.23	0	CHEMBL5734901	SMYD3 Biochemical Assay: The assays were all performed in a buffer consisting of 25 mM Tris-Cl pH 8.0
CHEMBL5959488		None	463.56	0	1.98	BDBM432756	COCCNc1ccc(S(=O)(=O)N2CC[C@H](NC(=O)c3cc(C4CC4)on3)C[C@H]2C)cn1	IC50	'>'	10000	nM			877639	UO_0000065					0	CHEMBL5734901	SMYD3 Biochemical Assay: The assays were all performed in a buffer consisting of 25 mM Tris-Cl pH 8.0
CHEMBL5852726		None	485.61	0	2.92	BDBM432765	CC(C)CNc1ccc(S(=O)(=O)C23CC4CC(NC(=O)c5cc(C6CC6)on5)CC(C2)N43)cn1	IC50	'='	3120	nM	5.51		877648	UO_0000065	11.34	0.22	2.59	4.69	0	CHEMBL5734901	SMYD3 Biochemical Assay: The assays were all performed in a buffer consisting of 25 mM Tris-Cl pH 8.0
CHEMBL5912217		None	461.59	0	2.99	BDBM432774	CC(C)CNc1ncccc1S(=O)(=O)N1CC[C@H](NC(=O)c2cc(C3CC3)on2)C[C@@H]1C	IC50	'='	2737	nM	5.56		877657	UO_0000065	12.05	0.24	2.57	4.74	0	CHEMBL5734901	SMYD3 Biochemical Assay: The assays were all performed in a buffer consisting of 25 mM Tris-Cl pH 8.0
CHEMBL6034022		None	448.55	0	1.29	BDBM432775	C[C@H]1C[C@@H](NC(=O)c2cc(C3CC3)on2)CCN1S(=O)(=O)c1cccnc1NCCN	IC50	'='	86.5	nM	7.06		877658	UO_0000065	15.75	0.31	5.77	4.92	0	CHEMBL5734901	SMYD3 Biochemical Assay: The assays were all performed in a buffer consisting of 25 mM Tris-Cl pH 8.0
CHEMBL5793989		None	383.47	0	1.25	BDBM432782	C[C@H]1C[C@@H](NC(=O)c2cc(C3CC3)on2)CCN1S(=O)(=O)C1CCOC1	IC50	'='	928	nM	6.03		877665	UO_0000065	15.73	0.32	4.78	5.93	0	CHEMBL5734901	SMYD3 Biochemical Assay: The assays were all performed in a buffer consisting of 25 mM Tris-Cl pH 8.0
CHEMBL5864835		None	368.46	0	0.57	BDBM432696	NCCS(=O)(=O)N1[C@@H]2CC[C@H]1C[C@@H](NC(=O)c1cc(C3CC3)on1)C2	IC50	'='	41.7	nM	7.38		877579	UO_0000065	20.03	0.4	6.81	6.23	0	CHEMBL5734901	SMYD3 Biochemical Assay: The assays were all performed in a buffer consisting of 25 mM Tris-Cl pH 8.0
CHEMBL5892200		None	475.62	0	3.01	BDBM432808	CC(C)CN(C)c1cc(S(=O)(=O)N2CC[C@@H](NC(=O)c3cc(C4CC4)on3)C[C@@H]2C)ccn1	IC50	'>'	10000	nM			877691	UO_0000065					0	CHEMBL5734901	SMYD3 Biochemical Assay: The assays were all performed in a buffer consisting of 25 mM Tris-Cl pH 8.0
CHEMBL5864618		None	462.58	0	1.31	BDBM432809	C[C@@H]1C[C@@H](NC(=O)c2cc(C3CC3)on2)CCN1S(=O)(=O)c1ccnc(N(C)CCN)c1	IC50	'='	487	nM	6.31		877692	UO_0000065	13.65	0.27	5	4.69	0	CHEMBL5734901	SMYD3 Biochemical Assay: The assays were all performed in a buffer consisting of 25 mM Tris-Cl pH 8.0
CHEMBL5871709		None	475.62	0	3.01	BDBM432711	CC(C)CN(C)c1ccc(S(=O)(=O)N2CC[C@@H](NC(=O)c3cc(C4CC4)on3)C[C@@H]2C)cn1	IC50	'>'	10000	nM			877594	UO_0000065					0	CHEMBL5734901	SMYD3 Biochemical Assay: The assays were all performed in a buffer consisting of 25 mM Tris-Cl pH 8.0
CHEMBL5768602		None	463.56	0	1.98	BDBM432713	COCCNc1ccc(S(=O)(=O)N2CC[C@H](NC(=O)c3cc(C4CC4)on3)C[C@@H]2C)cn1	IC50	'='	1483	nM	5.83		877596	UO_0000065	12.57	0.25	3.85	4.6	0	CHEMBL5734901	SMYD3 Biochemical Assay: The assays were all performed in a buffer consisting of 25 mM Tris-Cl pH 8.0
CHEMBL6003668		None	357.41	0	1.63	BDBM432727	CC1CC(NC(=O)c2cc(C3CC3)on2)CCN1C(=O)Cc1ncc[nH]1	IC50	'>'	10000	nM			877610	UO_0000065					0	CHEMBL5734901	SMYD3 Biochemical Assay: The assays were all performed in a buffer consisting of 25 mM Tris-Cl pH 8.0
CHEMBL5750570		None	422.55	0	1.7	BDBM432736	O=C(N[C@H]1C[C@H]2CC[C@@H](C1)N2S(=O)(=O)CCN1CCCC1)c1cc(C2CC2)on1	IC50	'='	61.3	nM	7.21		877619	UO_0000065	17.07	0.34	5.51	7.53	0	CHEMBL5734901	SMYD3 Biochemical Assay: The assays were all performed in a buffer consisting of 25 mM Tris-Cl pH 8.0
CHEMBL5758235		None	450.61	0	2.34	BDBM433172	C[C@H](C1CCN(C)CC1)S(=O)(=O)N1[C@@H]2CC[C@H]1C[C@@H](NC(=O)c1cc(C3CC3)on1)C2	IC50	'='	10	nM	8		878055	UO_0000065	17.75	0.35	5.66	8.36	0	CHEMBL5734901	SMYD3 Biochemical Assay: The assays were all performed in a buffer consisting of 25 mM Tris-Cl pH 8.0
CHEMBL5906341		None	423.54	0	0.82	BDBM433183	CC1CN(S(=O)(=O)N2[C@@H]3CC[C@H]2C[C@@H](NC(=O)c2cc(C4CC4)on2)C3)CCN1	IC50	'='	12.2	nM	7.91		878066	UO_0000065	18.68	0.37	7.09	7.34	0	CHEMBL5734901	SMYD3 Biochemical Assay: The assays were all performed in a buffer consisting of 25 mM Tris-Cl pH 8.0
CHEMBL5781664		None	412.49	0	2.31	BDBM432968	C[C@@H]1C[C@H](NC(=O)c2cc(C3CC3)on2)CCN1C(=O)c1ccc(OCCN)cc1	IC50	'='	104	nM	6.98		877851	UO_0000065	16.93	0.32	4.67	6.31	0	CHEMBL5734901	SMYD3 Biochemical Assay: The assays were all performed in a buffer consisting of 25 mM Tris-Cl pH 8.0
CHEMBL5787132		None	486.64	0	2.69	BDBM432997	O=C(N[C@H]1CCN(S(=O)(=O)CC2CCCNC2)[C@@H](Cc2ccccc2)C1)c1cc(C2CC2)on1	IC50	'='	194	nM	6.71		877880	UO_0000065	13.79	0.27	4.02	6.42	0	CHEMBL5734901	SMYD3 Biochemical Assay: The assays were all performed in a buffer consisting of 25 mM Tris-Cl pH 8.0
CHEMBL5893991		None	472.61	0	2.44	BDBM433002	O=C(N[C@H]1C[C@H]2CC[C@@H](C1)N2S(=O)(=O)CCNCCc1ccccc1)c1cc(C2CC2)on1	IC50	'='	225	nM	6.65		877885	UO_0000065	14.07	0.28	4.21	6.36	0	CHEMBL5734901	SMYD3 Biochemical Assay: The assays were all performed in a buffer consisting of 25 mM Tris-Cl pH 8.0
CHEMBL5878073		None	411.53	0	0.48	BDBM433007	C[C@H]1CN(S(=O)(=O)N2CCN(C)CC2)CC[C@H]1NC(=O)c1cc(C2CC2)on1	IC50	'='	261	nM	6.58		877890	UO_0000065	16	0.32	6.1	6.65	0	CHEMBL5734901	SMYD3 Biochemical Assay: The assays were all performed in a buffer consisting of 25 mM Tris-Cl pH 8.0
CHEMBL5987482		None	439.58	0	1.4	BDBM433009	C[C@@H]1CN(S(=O)(=O)N2CC[C@H](NC(=O)c3cc(C4CC4)on3)C[C@@H]2C)[C@@H](C)CN1C	IC50	'='	275	nM	6.56		877892	UO_0000065	14.92	0.3	5.16	6.63	0	CHEMBL5734901	SMYD3 Biochemical Assay: The assays were all performed in a buffer consisting of 25 mM Tris-Cl pH 8.0
CHEMBL6053116		None	454.59	0	1.17	BDBM432886	C[C@@H]1C[C@H](NC(=O)c2cc(C3CC3)on2)CCN1S(=O)(=O)CC1CCN(CCO)CC1	IC50	'='	10.9	nM	7.96		877769	UO_0000065	17.52	0.35	6.79	6.87	0	CHEMBL5734901	SMYD3 Biochemical Assay: The assays were all performed in a buffer consisting of 25 mM Tris-Cl pH 8.0
CHEMBL5757580		None	437.57	0	1.21	BDBM432897	CC1(C)CN(S(=O)(=O)N2[C@@H]3CC[C@H]2C[C@@H](NC(=O)c2cc(C4CC4)on2)C3)CCN1	IC50	'='	13.5	nM	7.87		877780	UO_0000065	17.98	0.36	6.66	7.3	0	CHEMBL5734901	SMYD3 Biochemical Assay: The assays were all performed in a buffer consisting of 25 mM Tris-Cl pH 8.0
CHEMBL5762409		None	520.62	1	3.38	BDBM432910	C[C@H]1CN(S(=O)(=O)CC2CCN(CCCC(F)(F)F)CC2)CC[C@H]1NC(=O)c1cc(C2CC2)on1	IC50	'='	20.9	nM	7.68		877793	UO_0000065	14.75	0.3	4.3	8.02	0	CHEMBL5734901	SMYD3 Biochemical Assay: The assays were all performed in a buffer consisting of 25 mM Tris-Cl pH 8.0
CHEMBL5916205		None	436.56	0	3.44	BDBM432913	C[C@@H]1C[C@H](NC(=O)c2cc(C3CC3)on2)CCN1C(=O)c1ccc(C2CCCNC2)cc1	IC50	'='	21.9	nM	7.66		877796	UO_0000065	17.55	0.33	4.22	8.76	0	CHEMBL5734901	SMYD3 Biochemical Assay: The assays were all performed in a buffer consisting of 25 mM Tris-Cl pH 8.0
CHEMBL5795623		None	374.49	0	2.15	BDBM432371	C[C@@H]1CC(NC(=O)c2cc(C3CC3)on2)CCN1C(=O)CCN1CCCC1	IC50	'='	7726	nM	5.11		877254	UO_0000065	13.65	0.26	2.96	6.5	0	CHEMBL5734901	SMYD3 Biochemical Assay: The assays were all performed in a buffer consisting of 25 mM Tris-Cl pH 8.0
CHEMBL5931317		None	388.51	0	2.3	BDBM432377	CC[C@H]1CN(C(=O)CC2CCNCC2)CC[C@@H]1NC(=O)c1cc(C2CC2)on1	IC50	'='	541	nM	6.27		877260	UO_0000065	16.13	0.31	3.97	7.16	0	CHEMBL5734901	SMYD3 Biochemical Assay: The assays were all performed in a buffer consisting of 25 mM Tris-Cl pH 8.0
CHEMBL5778002		None	346.43	0	1.4	BDBM432388	C[C@@H]1CC(NC(=O)c2cc(C3CC3)on2)CCN1C(=O)[C@H]1C[C@@H](N)C1	IC50	'='	3252	nM	5.49		877271	UO_0000065	15.84	0.3	4.09	5.41	0	CHEMBL5734901	SMYD3 Biochemical Assay: The assays were all performed in a buffer consisting of 25 mM Tris-Cl pH 8.0
CHEMBL5751725		None	480.49	0	2.81	BDBM432421	NC[C@@H](Cc1ccc(O)c(C(F)(F)F)c1)C(=O)N1CCC(NC(=O)c2cc(C3CC3)on2)CC1	IC50	'='	81.6	nM	7.09		877304	UO_0000065	14.75	0.28	4.28	5.82	0	CHEMBL5734901	SMYD3 Biochemical Assay: The assays were all performed in a buffer consisting of 25 mM Tris-Cl pH 8.0
CHEMBL6063761		None	409.43	0	2.42	BDBM432592	C[C@H]1C[C@H](NC(=O)c2cc(C3CC3)on2)CCN1S(=O)(=O)CCC(F)(F)F	IC50	'>'	10000	nM			877475	UO_0000065					0	CHEMBL5734901	SMYD3 Biochemical Assay: The assays were all performed in a buffer consisting of 25 mM Tris-Cl pH 8.0
CHEMBL5878218		None	348.45	0	1.65	BDBM432599	CC[C@H]1CN(C(=O)CCCN)CC[C@H]1NC(=O)c1cc(C2CC2)on1	IC50	'='	989	nM	6		877482	UO_0000065	17.23	0.33	4.35	5.92	0	CHEMBL5734901	SMYD3 Biochemical Assay: The assays were all performed in a buffer consisting of 25 mM Tris-Cl pH 8.0
CHEMBL5943210		None	360.46	0	1.66	BDBM432433	C[C@H]1CC(NC(=O)c2cc(C3CC3)on2)CCN1C(=O)C1CCCNC1	IC50	'='	5545	nM	5.26		877316	UO_0000065	14.58	0.28	3.6	6.01	0	CHEMBL5734901	SMYD3 Biochemical Assay: The assays were all performed in a buffer consisting of 25 mM Tris-Cl pH 8.0
CHEMBL5767207		None	402.54	0	2.78	BDBM432440	C[C@@H]1CC(NC(=O)c2cc(C3CC3)on2)CCN1C(=O)[C@H]1CC[C@H](N(C)C)CC1	IC50	'='	1647	nM	5.78		877323	UO_0000065	14.37	0.27	3	7.35	0	CHEMBL5734901	SMYD3 Biochemical Assay: The assays were all performed in a buffer consisting of 25 mM Tris-Cl pH 8.0
CHEMBL5939176		None	334.42	0	1.4	BDBM432443	C[C@H]1CC(NC(=O)c2cc(C3CC3)on2)CCN1C(=O)CCCN	IC50	'='	3645	nM	5.44		877326	UO_0000065	16.26	0.31	4.04	5.36	0	CHEMBL5734901	SMYD3 Biochemical Assay: The assays were all performed in a buffer consisting of 25 mM Tris-Cl pH 8.0
CHEMBL6035714		None	409.43	0	2.42	BDBM432645	C[C@@H]1C[C@@H](NC(=O)c2cc(C3CC3)on2)CCN1S(=O)(=O)CCC(F)(F)F	IC50	'>'	10000	nM			877528	UO_0000065					0	CHEMBL5734901	SMYD3 Biochemical Assay: The assays were all performed in a buffer consisting of 25 mM Tris-Cl pH 8.0
CHEMBL5761462		None	450.58	0	3.27	BDBM432649	O=C(N[C@@H]1CCN(C(=O)CC2CCNCC2)[C@H](Cc2ccccc2)C1)c1cc(C2CC2)on1	IC50	'='	2265	nM	5.64		877532	UO_0000065	12.53	0.23	2.37	6.45	0	CHEMBL5734901	SMYD3 Biochemical Assay: The assays were all performed in a buffer consisting of 25 mM Tris-Cl pH 8.0
CHEMBL5740325		None	456.52	0	2.16	BDBM432792	O=C1Cc2cc(S(=O)(=O)N3[C@@H]4CC[C@H]3C[C@H](NC(=O)c3cc(C5CC5)on3)C4)ccc2N1	IC50	'='	842	nM	6.08		877675	UO_0000065	13.31	0.26	3.91	5	0	CHEMBL5734901	SMYD3 Biochemical Assay: The assays were all performed in a buffer consisting of 25 mM Tris-Cl pH 8.0
CHEMBL6002972		None	401.49	0	2.67	BDBM432699	O=C(N[C@@H]1C[C@H]2CC[C@@H](C1)N2S(=O)(=O)c1ccccc1)c1cc(C2CC2)on1	IC50	'='	833	nM	6.08		877582	UO_0000065	15.14	0.3	3.41	6.57	0	CHEMBL5734901	SMYD3 Biochemical Assay: The assays were all performed in a buffer consisting of 25 mM Tris-Cl pH 8.0
CHEMBL5944433		None	415.48	0	1.79	BDBM432810	C[C@H]1C[C@@H](NC(=O)c2cc(C3CC3)on2)CCN1S(=O)(=O)c1ccc(C#N)nc1	IC50	'='	1093	nM	5.96		877693	UO_0000065	14.35	0.28	4.17	4.61	0	CHEMBL5734901	SMYD3 Biochemical Assay: The assays were all performed in a buffer consisting of 25 mM Tris-Cl pH 8.0
CHEMBL5828046		None	486.6	0	1.62	BDBM432813	NCCCNc1ccc(S(=O)(=O)C23CC4CC(NC(=O)c5cc(C6CC6)on5)CC(C2)N43)cn1	IC50	'='	74.2	nM	7.13		877696	UO_0000065	14.65	0.29	5.51	4.97	0	CHEMBL5734901	SMYD3 Biochemical Assay: The assays were all performed in a buffer consisting of 25 mM Tris-Cl pH 8.0
CHEMBL5748853		None	384.5	0	1.72	BDBM432815	CCN(CC)S(=O)(=O)N1CC[C@H](NC(=O)c2cc(C3CC3)on2)C[C@@H]1C	IC50	'='	3718	nM	5.43		877698	UO_0000065	14.12	0.29	3.71	5.67	0	CHEMBL5734901	SMYD3 Biochemical Assay: The assays were all performed in a buffer consisting of 25 mM Tris-Cl pH 8.0
CHEMBL6051661		None	448.55	0	1.29	BDBM432715	C[C@H]1C[C@H](NC(=O)c2cc(C3CC3)on2)CCN1S(=O)(=O)c1ccc(NCCN)nc1	IC50	'='	135	nM	6.87		877598	UO_0000065	15.32	0.3	5.58	4.79	0	CHEMBL5734901	SMYD3 Biochemical Assay: The assays were all performed in a buffer consisting of 25 mM Tris-Cl pH 8.0
CHEMBL5918993		None	446.57	0	2.72	BDBM432838	C[C@H]1C[C@@H](NC(=O)c2cc(C3CC3)on2)CCN1S(=O)(=O)c1ccc(C(C)(C)N)cc1	IC50	'='	1.4	nM	8.85		877721	UO_0000065	19.83	0.39	6.13	7.47	0	CHEMBL5734901	SMYD3 Biochemical Assay: The assays were all performed in a buffer consisting of 25 mM Tris-Cl pH 8.0
CHEMBL5903142		None	435.55	0	0.95	BDBM432849	NC1CC2(C1)CN(S(=O)(=O)N1[C@@H]3CC[C@H]1C[C@@H](NC(=O)c1cc(C4CC4)on1)C3)C2	IC50	'='	3.1	nM	8.51		877732	UO_0000065	19.54	0.39	7.56	6.99	0	CHEMBL5734901	SMYD3 Biochemical Assay: The assays were all performed in a buffer consisting of 25 mM Tris-Cl pH 8.0
CHEMBL5953390		None	468.62	0	1.82	BDBM432851	COCCN1CCC(CS(=O)(=O)N2CC[C@H](NC(=O)c3cc(C4CC4)on3)C[C@@H]2C)CC1	IC50	'='	3.5	nM	8.46		877734	UO_0000065	18.04	0.36	6.64	8.05	0	CHEMBL5734901	SMYD3 Biochemical Assay: The assays were all performed in a buffer consisting of 25 mM Tris-Cl pH 8.0
CHEMBL5749777		None	397.5	0	0.28	BDBM432855	C[C@H]1C[C@@H](NC(=O)c2cc(C3CC3)on2)CCN1S(=O)(=O)N1CCNCC1	IC50	'='	4.3	nM	8.37		877738	UO_0000065	21.05	0.42	8.09	7.76	0	CHEMBL5734901	SMYD3 Biochemical Assay: The assays were all performed in a buffer consisting of 25 mM Tris-Cl pH 8.0
CHEMBL6043585		None	410.54	0	1.29	BDBM432859	CCc1cc(C(=O)N[C@H]2C[C@H]3CC[C@@H](C2)N3S(=O)(=O)CC2CCNCC2)no1	IC50	'='	5.2	nM	8.28		877742	UO_0000065	20.18	0.4	6.99	7.92	0	CHEMBL5734901	SMYD3 Biochemical Assay: The assays were all performed in a buffer consisting of 25 mM Tris-Cl pH 8.0
CHEMBL5985557		None	468.62	0	1.82	BDBM432880	COCCN1CCC(CS(=O)(=O)N2CC[C@@H](NC(=O)c3cc(C4CC4)on3)C[C@H]2C)CC1	IC50	'='	10.4	nM	7.98		877763	UO_0000065	17.04	0.34	6.16	7.6	0	CHEMBL5734901	SMYD3 Biochemical Assay: The assays were all performed in a buffer consisting of 25 mM Tris-Cl pH 8.0
CHEMBL5939708		None	396.49	0	2.99	BDBM432961	C[C@@H]1C[C@H](NC(=O)c2cc(C3CC3)on2)CCN1C(=O)c1ccc([C@@H](C)N)cc1	IC50	'='	86.6	nM	7.06		877844	UO_0000065	17.81	0.33	4.07	6.96	0	CHEMBL5734901	SMYD3 Biochemical Assay: The assays were all performed in a buffer consisting of 25 mM Tris-Cl pH 8.0
CHEMBL4518844		None	414.94	0	2.79	10	NCCCC(=O)N1CCN(C(=O)c2ccc3c(Cl)c4c(nc3c2)CCCC4)CC1	IC50	'>'	750000	nM		Outside typical range		UO_0000065					0	CHEMBL4306860	Inhibition of SMYD3 (unknown origin) using MAP3K2 peptide as substrate pretreated for 30 mins followed by substrate addition and measured after 30 mins by MTase Glo reagent based luminescence assay	B	BAO_0000357	single protein format	Homo sapiens	None	None	None	None				CHEMBL2321643	Histone-lysine N-methyltransferase SMYD3	Homo sapiens	SINGLE PROTEIN	CHEMBL4304770	1	Scientific Literature	ACS Med Chem Lett	2019	None				750
CHEMBL4539611		None	410.54	0	1.56	9	CCN1CCC(S(=O)(=O)N2CCC(NC(=O)c3cc(C4CC4)on3)CC2)CC1	IC50	'='	100	nM	7			UO_0000065	17.05	0.34	5.44	7.31	0	CHEMBL4338950	Inhibition of recombinant N-terminal FLAG/His-tagged SMYD3 (unknown origin) expressed in baculovirus infected insect cells using 3H-SAM as substrate assessed as 3H-MEKK2 methylation incubated for 40 mins by scintillation proximity assay	B	BAO_0000219	cell-based format	Homo sapiens	None	None	None	None				CHEMBL2321643	Histone-lysine N-methyltransferase SMYD3	Homo sapiens	SINGLE PROTEIN	CHEMBL4334548	1	Scientific Literature	ACS Med Chem Lett	2020	None				100
CHEMBL4521928		None	410.54	0	1.59	13	N[C@H]1CC[C@H](CS(=O)(=O)N2CCC(NC(=O)c3cc(C4CC4)on3)CC2)CC1	IC50	'='	2.5	nM	8.6			UO_0000065	20.95	0.42	7.01	7.26	0	CHEMBL4338950	Inhibition of recombinant N-terminal FLAG/His-tagged SMYD3 (unknown origin) expressed in baculovirus infected insect cells using 3H-SAM as substrate assessed as 3H-MEKK2 methylation incubated for 40 mins by scintillation proximity assay	B	BAO_0000219	cell-based format	Homo sapiens	None	None	None	None				CHEMBL2321643	Histone-lysine N-methyltransferase SMYD3	Homo sapiens	SINGLE PROTEIN	CHEMBL4334548	1	Scientific Literature	ACS Med Chem Lett	2020	None				2.5
CHEMBL4594207		None	518.66	1	3.56	32	O=C(NC1CCN(S(=O)(=O)C[C@H]2CC[C@H](NCc3ccc(F)cc3)CC2)CC1)c1cc(C2CC2)on1	IC50	'='	1.3	nM	8.89			UO_0000065	17.13	0.34	5.33	8.5	0	CHEMBL4338950	Inhibition of recombinant N-terminal FLAG/His-tagged SMYD3 (unknown origin) expressed in baculovirus infected insect cells using 3H-SAM as substrate assessed as 3H-MEKK2 methylation incubated for 40 mins by scintillation proximity assay	B	BAO_0000219	cell-based format	Homo sapiens	None	None	None	None				CHEMBL2321643	Histone-lysine N-methyltransferase SMYD3	Homo sapiens	SINGLE PROTEIN	CHEMBL4334548	1	Scientific Literature	ACS Med Chem Lett	2020	None				1.3
CHEMBL4515665		None	518.66	1	3.56	34	O=C(NC1CCN(S(=O)(=O)C[C@H]2CC[C@H](NCc3ccccc3F)CC2)CC1)c1cc(C2CC2)on1	IC50	'='	2.5	nM	8.6			UO_0000065	16.59	0.33	5.04	8.23	0	CHEMBL4338950	Inhibition of recombinant N-terminal FLAG/His-tagged SMYD3 (unknown origin) expressed in baculovirus infected insect cells using 3H-SAM as substrate assessed as 3H-MEKK2 methylation incubated for 40 mins by scintillation proximity assay	B	BAO_0000219	cell-based format	Homo sapiens	None	None	None	None				CHEMBL2321643	Histone-lysine N-methyltransferase SMYD3	Homo sapiens	SINGLE PROTEIN	CHEMBL4334548	1	Scientific Literature	ACS Med Chem Lett	2020	None				2.5
CHEMBL4472479		None	519.64	1	2.96	48	O=C(NC1CCN(S(=O)(=O)C[C@H]2CC[C@H](NCc3cc(F)ccn3)CC2)CC1)c1cc(C2CC2)on1	IC50	'='	10	nM	8			UO_0000065	15.4	0.3	5.04	6.81	0	CHEMBL4338950	Inhibition of recombinant N-terminal FLAG/His-tagged SMYD3 (unknown origin) expressed in baculovirus infected insect cells using 3H-SAM as substrate assessed as 3H-MEKK2 methylation incubated for 40 mins by scintillation proximity assay	B	BAO_0000219	cell-based format	Homo sapiens	None	None	None	None				CHEMBL2321643	Histone-lysine N-methyltransferase SMYD3	Homo sapiens	SINGLE PROTEIN	CHEMBL4334548	1	Scientific Literature	ACS Med Chem Lett	2020	None				10
CHEMBL4586858		None	515.68	1	3.13	45	Cc1ccc(CN[C@H]2CC[C@H](CS(=O)(=O)N3CCC(NC(=O)c4cc(C5CC5)on4)CC3)CC2)nc1	IC50	'='	5	nM	8.3			UO_0000065	16.1	0.31	5.17	7.07	0	CHEMBL4338950	Inhibition of recombinant N-terminal FLAG/His-tagged SMYD3 (unknown origin) expressed in baculovirus infected insect cells using 3H-SAM as substrate assessed as 3H-MEKK2 methylation incubated for 40 mins by scintillation proximity assay	B	BAO_0000219	cell-based format	Homo sapiens	None	None	None	None				CHEMBL2321643	Histone-lysine N-methyltransferase SMYD3	Homo sapiens	SINGLE PROTEIN	CHEMBL4334548	1	Scientific Literature	ACS Med Chem Lett	2020	None				5
CHEMBL3797575		None	481.02	0	1.89	10	O=C1Cc2cc(C(=O)N[C@H]3C[C@H]4CC[C@@H](C3)N4S(=O)(=O)C[C@@H]3CCCNC3)c(Cl)cc2N1	IC50	'='	730	nM	6.14			UO_0000065	12.76	0.26	4.25	5.7	0	CHEMBL3803120	Inhibition of human SMYD3 expressed in HEK293T/17 cells using FLAG-tagged MEKK2 as substrate incubated for 30 mins in low air flow area followed by incubation for 24 hrs at 37 degC by Western blot analysis	B	BAO_0000219	cell-based format	Homo sapiens	None	None	HEK-293T	None				CHEMBL2321643	Histone-lysine N-methyltransferase SMYD3	Homo sapiens	SINGLE PROTEIN	CHEMBL3797202	1	Scientific Literature	ACS Med Chem Lett	2016	CHEMBL3706569				730
CHEMBL3797708		None	460.6	0	1.58	7	CN1CCC(CS(=O)(=O)N2[C@@H]3CC[C@H]2C[C@@H](NC(=O)c2ccc4c(c2)CC(=O)N4)C3)CC1	IC50	'='	480	nM	6.32			UO_0000065	13.72	0.27	4.74	6.39	0	CHEMBL3803120	Inhibition of human SMYD3 expressed in HEK293T/17 cells using FLAG-tagged MEKK2 as substrate incubated for 30 mins in low air flow area followed by incubation for 24 hrs at 37 degC by Western blot analysis	B	BAO_0000219	cell-based format	Homo sapiens	None	None	HEK-293T	None				CHEMBL2321643	Histone-lysine N-methyltransferase SMYD3	Homo sapiens	SINGLE PROTEIN	CHEMBL3797202	1	Scientific Literature	ACS Med Chem Lett	2016	CHEMBL3706569				480
CHEMBL3799542		None	446.57	0	1.24	5	O=C1Cc2cc(C(=O)N[C@H]3C[C@H]4CC[C@@H](C3)N4S(=O)(=O)CC3CCNCC3)ccc2N1	IC50	'='	3400	nM	5.47			UO_0000065	12.25	0.24	4.23	5.08	0	CHEMBL3803120	Inhibition of human SMYD3 expressed in HEK293T/17 cells using FLAG-tagged MEKK2 as substrate incubated for 30 mins in low air flow area followed by incubation for 24 hrs at 37 degC by Western blot analysis	B	BAO_0000219	cell-based format	Homo sapiens	None	None	HEK-293T	None				CHEMBL2321643	Histone-lysine N-methyltransferase SMYD3	Homo sapiens	SINGLE PROTEIN	CHEMBL3797202	1	Scientific Literature	ACS Med Chem Lett	2016	CHEMBL3706569				3400
CHEMBL3798741		None	591.1	1	3.94	EPZ031686	O=C1Cc2cc(C(=O)N[C@H]3C[C@H]4CC[C@@H](C3)N4S(=O)(=O)CC3CCN(CCCC(F)(F)F)CC3)c(Cl)cc2N1	IC50	'='	3	nM	8.52			UO_0000065	14.42	0.3	4.58	8.62	0	CHEMBL3803119	Inhibition of full length N-terminal His-tagged SMYD3 (1 to 428 residues) (unknown origin) expressed in Escherichia coli using N-terminal GST-tagged MEKK2 as substrate preincubated for 30 mins followed by substrate addition by scintillation proximity assay in presence of [3H]SAM	B	BAO_0000019	assay format	Homo sapiens	None	None	None	None				CHEMBL2321643	Histone-lysine N-methyltransferase SMYD3	Homo sapiens	SINGLE PROTEIN	CHEMBL3797202	1	Scientific Literature	ACS Med Chem Lett	2016	None				3
CHEMBL3797585		None	414.92	0	0.71	3	NCCCS(=O)(=O)N1CCC(NC(=O)c2cc3c(cc2Cl)NC(=O)C3)CC1	IC50	'='	6800	nM	5.17			UO_0000065	12.45	0.26	4.46	4.25	0	CHEMBL3803120	Inhibition of human SMYD3 expressed in HEK293T/17 cells using FLAG-tagged MEKK2 as substrate incubated for 30 mins in low air flow area followed by incubation for 24 hrs at 37 degC by Western blot analysis	B	BAO_0000219	cell-based format	Homo sapiens	None	None	HEK-293T	None				CHEMBL2321643	Histone-lysine N-methyltransferase SMYD3	Homo sapiens	SINGLE PROTEIN	CHEMBL3797202	1	Scientific Literature	ACS Med Chem Lett	2016	CHEMBL3706569				6800
CHEMBL5897120		None	319.41	0	0.51	BDBM378363	CC(NC(=O)/C=C/c1c[nH]cn1)C1CCN(C(=O)[C@H](C)N)CC1	IC50	'>'	100000	nM			756369	UO_0000065					0	CHEMBL5733491	SMYD3 Biochemical Assay: The assays were all performed in a buffer consisting of 25 mM Tris-Cl pH 8.0
CHEMBL3797524		None	460.6	0	1.26	BDBM378478	CN1C(=O)Cc2cc(C(=O)N[C@H]3C[C@H]4CC[C@@H](C3)N4S(=O)(=O)CC3CCNCC3)ccc21	IC50	'='	25.9	nM	7.59		756484	UO_0000065	16.47	0.32	6.33	7.68	1	CHEMBL5733491	SMYD3 Biochemical Assay: The assays were all performed in a buffer consisting of 25 mM Tris-Cl pH 8.0
CHEMBL5925782		None	369.47	0	2.35	BDBM378196	COc1ccc2cc(C(=O)N[C@H]3CC[C@H](NC(=O)CCN)CC3)ccc2c1	IC50	'='	28000	nM	4.55		756202	UO_0000065	12.32	0.23	2.2	4.87	0	CHEMBL5733491	SMYD3 Biochemical Assay: The assays were all performed in a buffer consisting of 25 mM Tris-Cl pH 8.0
CHEMBL5858420		None	358.44	0	1.68	BDBM378241	COc1cccc2[nH]cc(C(=O)N[C@H]3CC[C@H](NC(=O)CCN)CC3)c12	IC50	'>'	100000	nM			756247	UO_0000065					0	CHEMBL5733491	SMYD3 Biochemical Assay: The assays were all performed in a buffer consisting of 25 mM Tris-Cl pH 8.0
CHEMBL6015880		None	341.42	0	1.14	BDBM378243	NCCC(=O)N[C@H]1CC[C@H](NC(=O)c2cnc3ccccc3n2)CC1	IC50	'>'	100000	nM			756249	UO_0000065					0	CHEMBL5733491	SMYD3 Biochemical Assay: The assays were all performed in a buffer consisting of 25 mM Tris-Cl pH 8.0
CHEMBL6006002		None	236.32	0	0.9	BDBM377882	CCn1ccc(C(=O)N[C@H]2CC[C@H](N)CC2)n1	IC50	'='	112370	nM		Outside typical range	755894	UO_0000065					0	CHEMBL5733491	SMYD3 Biochemical Assay: The assays were all performed in a buffer consisting of 25 mM Tris-Cl pH 8.0
CHEMBL5801801		None	289.34	0	1.02	BDBM377888	N[C@H]1CC[C@H](NC(=O)c2ccc3c(c2)OCC(=O)N3)CC1	IC50	'='	102250	nM		Outside typical range	755900	UO_0000065					0	CHEMBL5733491	SMYD3 Biochemical Assay: The assays were all performed in a buffer consisting of 25 mM Tris-Cl pH 8.0
CHEMBL6012429		None	279.34	0	-0.08	BDBM378404	NCCC(=O)N[C@H]1CC[C@H](NC(=O)c2c[nH]cn2)CC1	IC50	'>'	50000	nM			756410	UO_0000065					0	CHEMBL5733491	SMYD3 Biochemical Assay: The assays were all performed in a buffer consisting of 25 mM Tris-Cl pH 8.0
CHEMBL5774495		None	339.46	0	0.95	BDBM378430	C[C@@H]1C[C@@H](NC(=O)c2ccccc2)CCN1S(=O)(=O)CCCN	IC50	'>'	10000	nM			756436	UO_0000065					0	CHEMBL5733491	SMYD3 Biochemical Assay: The assays were all performed in a buffer consisting of 25 mM Tris-Cl pH 8.0
CHEMBL5930871		None	291.36	0	-0.02	BDBM378123	NCCC(=O)N[C@H]1CC[C@H](NC(=O)c2cnccn2)CC1	IC50	'='	37360	nM	4.43		756129	UO_0000065	15.2	0.29	4.45	4.03	0	CHEMBL5733491	SMYD3 Biochemical Assay: The assays were all performed in a buffer consisting of 25 mM Tris-Cl pH 8.0
CHEMBL6064044		None	446.57	0	1.33	BDBM378482	O=C1Cc2cc(C(=O)N[C@H]3C[C@H]4CC[C@@H](C3)N4S(=O)(=O)CCN3CCCC3)ccc2N1	IC50	'='	49.7	nM	7.3		756488	UO_0000065	16.35	0.32	5.97	7.39	0	CHEMBL5733491	SMYD3 Biochemical Assay: The assays were all performed in a buffer consisting of 25 mM Tris-Cl pH 8.0
CHEMBL5784417		None	410.54	0	0.29	BDBM378486	CCc1cnnc(C(=O)N[C@H]2CCN(S(=O)(=O)N3CCC(N)CC3)[C@@H](C)C2)c1	IC50	'='	59.6	nM	7.22		756492	UO_0000065	17.6	0.35	6.93	5.95	0	CHEMBL5733491	SMYD3 Biochemical Assay: The assays were all performed in a buffer consisting of 25 mM Tris-Cl pH 8.0
CHEMBL3797419		None	380.47	0	0.05	BDBM378491	NCCCS(=O)(=O)N1CCC(NC(=O)c2ccc3c(c2)CC(=O)N3)CC1	IC50	'='	159	nM	6.8		756497	UO_0000065	17.87	0.36	6.75	5.59	1	CHEMBL5733491	SMYD3 Biochemical Assay: The assays were all performed in a buffer consisting of 25 mM Tris-Cl pH 8.0
CHEMBL5748539		None	358.44	0	0.89	BDBM377958	CC(NC(=O)c1ccc2c(c1)CC(=O)N2)C1CCN(C(=O)[C@@H](C)N)CC1	IC50	'='	9370	nM	5.03		755967	UO_0000065	14.03	0.26	4.14	4.81	0	CHEMBL5733491	SMYD3 Biochemical Assay: The assays were all performed in a buffer consisting of 25 mM Tris-Cl pH 8.0
CHEMBL5908218		None	372.47	0	1.28	BDBM377967	CC(NC(=O)c1ccc2c(c1)CCC(=O)N2)C1CCN(C(=O)[C@H](C)N)CC1	IC50	'='	192590	nM		Outside typical range	755976	UO_0000065					0	CHEMBL5733491	SMYD3 Biochemical Assay: The assays were all performed in a buffer consisting of 25 mM Tris-Cl pH 8.0
CHEMBL5791549		None	368.48	0	2.13	BDBM377968	CC(NC(=O)c1ccc2cc(N)ccc2c1)C1CCN(C(=O)[C@H](C)N)CC1	IC50	'='	145770	nM		Outside typical range	755977	UO_0000065					0	CHEMBL5733491	SMYD3 Biochemical Assay: The assays were all performed in a buffer consisting of 25 mM Tris-Cl pH 8.0
CHEMBL5820729		None	252.38	0	2.31	BDBM377924	CCc1ccc(C(=O)N[C@H]2CC[C@H](N)CC2)s1	IC50	'='	49880	nM	4.3		755934	UO_0000065	17.05	0.35	1.99	7.8	0	CHEMBL5733491	SMYD3 Biochemical Assay: The assays were all performed in a buffer consisting of 25 mM Tris-Cl pH 8.0
CHEMBL5870805		None	265.36	0	1.34	BDBM377950	CN(C)Cc1ccc(C(=O)N[C@H]2CC[C@H](N)CC2)o1	IC50	'='	38860	nM	4.41		755959	UO_0000065	16.62	0.32	3.07	6.17	0	CHEMBL5733491	SMYD3 Biochemical Assay: The assays were all performed in a buffer consisting of 25 mM Tris-Cl pH 8.0
CHEMBL5753926		None	461.59	0	0.84	BDBM378456	CNC1CCN(S(=O)(=O)N2[C@@H]3CC[C@H]2C[C@@H](NC(=O)c2ccc4c(c2)CC(=O)N4)C3)CC1	IC50	'='	2.13	nM	8.67		756462	UO_0000065	18.79	0.37	7.83	7.82	0	CHEMBL5733491	SMYD3 Biochemical Assay: The assays were all performed in a buffer consisting of 25 mM Tris-Cl pH 8.0
CHEMBL5817718		None	446.57	0	1.51	BDBM378458	N[C@H]1CC[C@@H](S(=O)(=O)N2[C@@H]3CC[C@H]2C[C@@H](NC(=O)c2ccc4c(c2)CC(=O)N4)C3)CC1	IC50	'='	2.33	nM	8.63		756464	UO_0000065	19.33	0.38	7.12	7.1	0	CHEMBL5733491	SMYD3 Biochemical Assay: The assays were all performed in a buffer consisting of 25 mM Tris-Cl pH 8.0
CHEMBL6052252		None	247.3	0	0.65	BDBM377978	NCCCCNC(=O)c1ccc2c(c1)CC(=O)N2	IC50	'='	13420	nM	4.87		755986	UO_0000065	19.7	0.37	4.22	5.79	0	CHEMBL5733491	SMYD3 Biochemical Assay: The assays were all performed in a buffer consisting of 25 mM Tris-Cl pH 8.0
CHEMBL5887182		None	234.3	0	0.66	BDBM377995	Nc1ccc(C(=O)N[C@H]2CC[C@H](N)CC2)cn1	IC50	'='	107830	nM		Outside typical range	756003	UO_0000065					0	CHEMBL5733491	SMYD3 Biochemical Assay: The assays were all performed in a buffer consisting of 25 mM Tris-Cl pH 8.0
CHEMBL6057253		None	247.34	0	1.64	BDBM377907	CCc1ccnc(C(=O)N[C@H]2CC[C@H](N)CC2)c1	IC50	'='	20500	nM	4.69		755919	UO_0000065	18.95	0.36	3.05	6.89	0	CHEMBL5733491	SMYD3 Biochemical Assay: The assays were all performed in a buffer consisting of 25 mM Tris-Cl pH 8.0
CHEMBL5896991		None	224.27	0	-0.61	BDBM378377	Nc1n[nH]c(C(=O)N[C@H]2CC[C@H](N)CC2)n1	IC50	'>'	50000	nM			756383	UO_0000065					0	CHEMBL5733491	SMYD3 Biochemical Assay: The assays were all performed in a buffer consisting of 25 mM Tris-Cl pH 8.0
CHEMBL6006640		None	364.24	0	2.7	BDBM378432	N[C@H]1CC[C@H](NC(=O)c2cc3cc(Br)ccc3nc2O)CC1	IC50	'>'	10000	nM			756438	UO_0000065					0	CHEMBL5733491	SMYD3 Biochemical Assay: The assays were all performed in a buffer consisting of 25 mM Tris-Cl pH 8.0
CHEMBL5779461		None	415.56	0	2.61	BDBM378435	C[C@@H]1C[C@H](NC(=O)c2ccc(-c3ccccc3)cc2)CCN1S(=O)(=O)CCCN	IC50	'>'	10000	nM			756441	UO_0000065					0	CHEMBL5733491	SMYD3 Biochemical Assay: The assays were all performed in a buffer consisting of 25 mM Tris-Cl pH 8.0
CHEMBL5954803		None	390.48	0	1.43	BDBM293347	O=C(CCN1CCOCC1)N[C@H]1CC[C@H](NC(=O)c2cc(C3CC3)on2)CC1	IC50	'='	20436	nM	4.69		559168	UO_0000065	12.01	0.23	3.26	4.85	0	CHEMBL5731515	SMYD3 Biochemical Assay: S-adenosylmethionine (SAM)
CHEMBL5832754		None	346.43	0	1.45	BDBM293357	N[C@H]1C[C@H](C(=O)N[C@H]2CC[C@H](NC(=O)c3cc(C4CC4)on3)CC2)C1	IC50	'='	269	nM	6.57		559175	UO_0000065	18.97	0.36	5.12	5.96	0	CHEMBL5731515	SMYD3 Biochemical Assay: S-adenosylmethionine (SAM)
CHEMBL55415	SCUTELLAREIN	None	286.24	0	2.28	23	O=c1cc(-c2ccc(O)cc2)oc2cc(O)c(O)c(O)c12	IC50	'='	18230	nM	4.74			UO_0000065	16.56	0.31	2.46	4.26	0	CHEMBL4628256	Inhibition of SMYD3 (unknown origin) preincubated for 15 mins followed by addition of [3H]-SAM as substrate and peptide solution after 240 mins cold SAM was added measured after 1 hr by radioisotope assay	B	BAO_0000357	single protein format	Homo sapiens	None	None	None	None				CHEMBL2321643	Histone-lysine N-methyltransferase SMYD3	Homo sapiens	SINGLE PROTEIN	CHEMBL4627299	1	Scientific Literature	Bioorg Med Chem	2020	None				18.23
CHEMBL5775345		None	246.35	0	2.25	BDBM377890	CCc1cccc(C(=O)N[C@H]2CC[C@H](N)CC2)c1	IC50	'='	57460	nM	4.24		755902	UO_0000065	17.21	0.32	1.99	7.69	0	CHEMBL5733491	SMYD3 Biochemical Assay: The assays were all performed in a buffer consisting of 25 mM Tris-Cl pH 8.0
CHEMBL5959372		None	239.34	0	1.45	BDBM378267	Cc1cnc(C(=O)N[C@H]2CC[C@H](N)CC2)s1	IC50	'>'	100000	nM			756273	UO_0000065					0	CHEMBL5733491	SMYD3 Biochemical Assay: The assays were all performed in a buffer consisting of 25 mM Tris-Cl pH 8.0
CHEMBL6002789		None	293.37	0	-0.07	BDBM378219	Cn1ccc(C(=O)N[C@H]2CC[C@H](NC(=O)CCN)CC2)n1	IC50	'>'	100000	nM			756225	UO_0000065					0	CHEMBL5733491	SMYD3 Biochemical Assay: The assays were all performed in a buffer consisting of 25 mM Tris-Cl pH 8.0
CHEMBL6058231		None	293.37	0	-0.07	BDBM378281	Cn1ccnc1C(=O)N[C@H]1CC[C@H](NC(=O)CCN)CC1	IC50	'>'	100000	nM			756287	UO_0000065					0	CHEMBL5733491	SMYD3 Biochemical Assay: The assays were all performed in a buffer consisting of 25 mM Tris-Cl pH 8.0
CHEMBL6062903		None	285.35	0	1.94	BDBM377991	N[C@H]1CC[C@H](NC(=O)c2ccc3ccc(O)nc3c2)CC1	IC50	'='	115790	nM		Outside typical range	755999	UO_0000065					0	CHEMBL5733491	SMYD3 Biochemical Assay: The assays were all performed in a buffer consisting of 25 mM Tris-Cl pH 8.0
CHEMBL5799121		None	354.43	0	-0.44	BDBM378355	CC(C)(CNC(=O)CN)CNS(=O)(=O)c1ccc2c(c1)CC(=O)N2	IC50	'='	18820	nM	4.72		756361	UO_0000065	13.33	0.27	5.17	3.62	0	CHEMBL5733491	SMYD3 Biochemical Assay: The assays were all performed in a buffer consisting of 25 mM Tris-Cl pH 8.0
CHEMBL6032863		None	225.25	0	-0.9	BDBM378398	N[C@H]1CC[C@H](NC(=O)c2n[nH]c(=O)[nH]2)CC1	IC50	'>'	50000	nM			756404	UO_0000065					0	CHEMBL5733491	SMYD3 Biochemical Assay: The assays were all performed in a buffer consisting of 25 mM Tris-Cl pH 8.0
CHEMBL3797524		None	460.6	0	1.26	8	CN1C(=O)Cc2cc(C(=O)N[C@H]3C[C@H]4CC[C@@H](C3)N4S(=O)(=O)CC3CCNCC3)ccc21	IC50	'='	26	nM	7.58			UO_0000065	16.47	0.32	6.33	7.68	0	CHEMBL3803119	Inhibition of full length N-terminal His-tagged SMYD3 (1 to 428 residues) (unknown origin) expressed in Escherichia coli using N-terminal GST-tagged MEKK2 as substrate preincubated for 30 mins followed by substrate addition by scintillation proximity assay in presence of [3H]SAM	B	BAO_0000019	assay format	Homo sapiens	None	None	None	None				CHEMBL2321643	Histone-lysine N-methyltransferase SMYD3	Homo sapiens	SINGLE PROTEIN	CHEMBL3797202	1	Scientific Literature	ACS Med Chem Lett	2016	None				26
CHEMBL3799083		None	446.57	0	1.51	12	N[C@H]1CC[C@H](S(=O)(=O)N2[C@@H]3CC[C@H]2C[C@@H](NC(=O)c2ccc4c(c2)CC(=O)N4)C3)CC1	IC50	'='	4	nM	8.4			UO_0000065	18.81	0.37	6.89	6.91	0	CHEMBL3803119	Inhibition of full length N-terminal His-tagged SMYD3 (1 to 428 residues) (unknown origin) expressed in Escherichia coli using N-terminal GST-tagged MEKK2 as substrate preincubated for 30 mins followed by substrate addition by scintillation proximity assay in presence of [3H]SAM	B	BAO_0000019	assay format	Homo sapiens	None	None	None	None				CHEMBL2321643	Histone-lysine N-methyltransferase SMYD3	Homo sapiens	SINGLE PROTEIN	CHEMBL3797202	1	Scientific Literature	ACS Med Chem Lett	2016	None				4
CHEMBL6036540		None	382.46	0	1.84	BDBM432295	N[C@@H](Cc1ccccc1)C(=O)N1CCC(NC(=O)c2cc(C3CC3)on2)CC1	IC50	'='	2876	nM	5.54		877187	UO_0000065	14.49	0.27	3.7	5.46	0	CHEMBL5734901	SMYD3 Biochemical Assay: The assays were all performed in a buffer consisting of 25 mM Tris-Cl pH 8.0
CHEMBL5838614		None	421.5	0	2.32	BDBM432297	N[C@H](Cc1c[nH]c2ccccc12)C(=O)N1CCC(NC(=O)c2cc(C3CC3)on2)CC1	IC50	'='	15469	nM	4.81		877188	UO_0000065	11.41	0.21	2.49	4.1	0	CHEMBL5734901	SMYD3 Biochemical Assay: The assays were all performed in a buffer consisting of 25 mM Tris-Cl pH 8.0
CHEMBL5633108		None	376.46	0	2.27	24	NCc1ccc(NC(=O)c2ccc3c(N4CCC(N)CC4)ncnc3c2)cc1	IC50	'='	8000	nM	5.1			UO_0000065	13.54	0.25	2.83	4.63	0	CHEMBL5628408	Displacement of 3H-SAM from SMYD3 (unknown origin) using biotinylated-MAP3K2 as substrate incubated for 45 mins by SPA assay	B	BAO_0000357	single protein format	Homo sapiens	None	None	None	None				CHEMBL2321643	Histone-lysine N-methyltransferase SMYD3	Homo sapiens	SINGLE PROTEIN	CHEMBL5625232	1	Scientific Literature	Eur J Med Chem	2023	None	TIME = 0.75 hr	INHIBITOR		8
CHEMBL4746525		None	396.49	0	2.83	Chemical probe: BAY-6035; Compound 31	C[C@H]1CC(=O)Nc2cc(C(=O)NCCC3CC3)ccc2N1C(=O)N1CC2CC2C1	IC50	'='	183	nM	6.74			UO_0000065	16.99	0.32	3.91	8.24	0	CHEMBL5665277	Inhibition of SMYD3 catalytic inactive mutant co-expressed with HA-tagged MAP3K2 transfected in human HeLa cells assessed as reduction of MAP3K2-K260me3 level incubated for 20 hrs by Western blotting analysis	B	BAO_0000219	cell-based format	Homo sapiens	None	None	HeLa	None	EFO_ID: MONDO:0004992 | EFO_TERM: cancer		UNDEFINED MUTATION	CHEMBL2321643	Histone-lysine N-methyltransferase SMYD3	Homo sapiens	SINGLE PROTEIN	CHEMBL5661986	72	Chemical Probe data from Scientific Literature	SLAS Discov	2021	None	TIME = 20.0 hr	INHIBITOR		183
CHEMBL4535915		None	382.49	0	0.83	7	O=C(NC1CCN(S(=O)(=O)C2CCNCC2)CC1)c1cc(C2CC2)on1	IC50	'='	167	nM	6.78			UO_0000065	17.72	0.36	5.95	6.48	0	CHEMBL4338956	Inhibition of SMYD3 (unknown origin) assessed as reduction in histone H4 methylation	B	BAO_0000357	single protein format	Homo sapiens	None	None	None	None				CHEMBL2321643	Histone-lysine N-methyltransferase SMYD3	Homo sapiens	SINGLE PROTEIN	CHEMBL4334548	1	Scientific Literature	ACS Med Chem Lett	2020	None				167
CHEMBL5665405		None	405.5	0	3.98	Compound 14	CC1CC(=O)Nc2cc(C(=O)NCCC3CCC3)ccc2N1C(=O)c1ccccc1	IC50	'='	1850	nM	5.73			UO_0000065	14.14	0.26	1.75	7.3	0	CHEMBL5665262	Binding affinity to recombinant human SMYD3 expressed in Escherichia coli assessed as catalytic inhibition using DYDNPIFEKFGKGGTYPRRYHVSYHGK-Biotin as substrate by scintillation proximity assay	B	BAO_0000019	assay format	Homo sapiens	None	None	None	None	EFO_ID: MONDO:0004992 | EFO_TERM: cancer			CHEMBL2321643	Histone-lysine N-methyltransferase SMYD3	Homo sapiens	SINGLE PROTEIN	CHEMBL5661986	72	Chemical Probe data from Scientific Literature	SLAS Discov	2021	None		INHIBITOR		1.85
CHEMBL5665427		None	413.52	0	2.3	Compound 15	C[C@H]1CC(=O)Nc2cc(C(=O)NCCC3CC3)ccc2N1C(=O)N1CCC(N)CC1	IC50	'='	24.5	nM	7.61			UO_0000065	18.4	0.35	5.31	7.06	0	CHEMBL5665262	Binding affinity to recombinant human SMYD3 expressed in Escherichia coli assessed as catalytic inhibition using DYDNPIFEKFGKGGTYPRRYHVSYHGK-Biotin as substrate by scintillation proximity assay	B	BAO_0000019	assay format	Homo sapiens	None	None	None	None	EFO_ID: MONDO:0004992 | EFO_TERM: cancer			CHEMBL2321643	Histone-lysine N-methyltransferase SMYD3	Homo sapiens	SINGLE PROTEIN	CHEMBL5661986	72	Chemical Probe data from Scientific Literature	SLAS Discov	2021	None		INHIBITOR		2.45
CHEMBL5822022		None	370.48	0	0.67	BDBM432991	C[C@H]1CN(S(=O)(=O)CCN)[C@@H](C)C[C@H]1NC(=O)c1cc(C2CC2)on1	IC50	'='	157	nM	6.8		877874	UO_0000065	18.37	0.37	6.13	5.74	0	CHEMBL5734901	SMYD3 Biochemical Assay: The assays were all performed in a buffer consisting of 25 mM Tris-Cl pH 8.0
CHEMBL5911647		None	438.59	0	2.02	BDBM433260	CCCc1cc(C(=O)N[C@H]2C[C@H]3CC[C@@H](C2)N3S(=O)(=O)CC2CCN(C)CC2)no1	IC50	'='	85.3	nM	7.07		878143	UO_0000065	16.12	0.32	5.05	7.38	0	CHEMBL5734901	SMYD3 Biochemical Assay: The assays were all performed in a buffer consisting of 25 mM Tris-Cl pH 8.0
CHEMBL5888349		None	446.57	0	2.54	BDBM433265	CCc1cc(C(=O)N[C@H]2C[C@H]3CC[C@@H](C2)N3S(=O)(=O)c2ccc(C(C)(C)N)cc2)no1	IC50	'='	89.3	nM	7.05		878148	UO_0000065	15.79	0.31	4.51	5.95	0	CHEMBL5734901	SMYD3 Biochemical Assay: The assays were all performed in a buffer consisting of 25 mM Tris-Cl pH 8.0
CHEMBL5897498		None	422.55	0	1.7	BDBM432735	O=C(N[C@@H]1C[C@H]2CC[C@@H](C1)N2S(=O)(=O)CCN1CCCC1)c1cc(C2CC2)on1	IC50	'='	2002	nM	5.7		877618	UO_0000065	13.49	0.27	4	5.95	0	CHEMBL5734901	SMYD3 Biochemical Assay: The assays were all performed in a buffer consisting of 25 mM Tris-Cl pH 8.0
CHEMBL5858233		None	495.65	0	1.56	BDBM433211	COCCN(C)C1CCN(S(=O)(=O)N2[C@@H]3CC[C@H]2C[C@@H](NC(=O)c2cc(C4CC4)on2)C3)CC1	IC50	'='	23.3	nM	7.63		878094	UO_0000065	15.4	0.31	6.07	7.05	0	CHEMBL5734901	SMYD3 Biochemical Assay: The assays were all performed in a buffer consisting of 25 mM Tris-Cl pH 8.0
CHEMBL6034011		None	564.75	1	1.64	BDBM433231	CN(CCCN1CCOCC1)C1CCN(S(=O)(=O)N2[C@@H]3CC[C@H]2C[C@@H](NC(=O)c2cc(C4CC4)on2)C3)CC1	IC50	'='	43.8	nM	7.36		878114	UO_0000065	13.03	0.26	5.72	6.6	0	CHEMBL5734901	SMYD3 Biochemical Assay: The assays were all performed in a buffer consisting of 25 mM Tris-Cl pH 8.0
CHEMBL5979823		None	451.59	0	1.55	BDBM433236	CC1CN(S(=O)(=O)N2[C@@H]3CC[C@H]2C[C@@H](NC(=O)c2cc(C4CC4)on2)C3)C(C)CN1C	IC50	'='	47.9	nM	7.32		878119	UO_0000065	16.21	0.32	5.77	7.39	0	CHEMBL5734901	SMYD3 Biochemical Assay: The assays were all performed in a buffer consisting of 25 mM Tris-Cl pH 8.0
CHEMBL5903954		None	472.61	0	3.12	BDBM433257	CNC(C)(C)c1ccc(S(=O)(=O)N2[C@@H]3CC[C@H]2C[C@@H](NC(=O)c2cc(C4CC4)on2)C3)cc1	IC50	'='	81.8	nM	7.09		878140	UO_0000065	15	0.29	3.97	6.78	0	CHEMBL5734901	SMYD3 Biochemical Assay: The assays were all performed in a buffer consisting of 25 mM Tris-Cl pH 8.0
CHEMBL6064695		None	390.47	0	1.92	BDBM433003	C[C@H]1C[C@@H](NC(=O)c2cc(C3CC3)on2)CCN1S(=O)(=O)c1ccncc1	IC50	'='	238	nM	6.62		877886	UO_0000065	16.96	0.34	4.7	6.28	0	CHEMBL5734901	SMYD3 Biochemical Assay: The assays were all performed in a buffer consisting of 25 mM Tris-Cl pH 8.0
CHEMBL5777014		None	544.72	1	2.78	BDBM433004	O=C(N[C@H]1CCN(S(=O)(=O)CC2CCN(CCCO)CC2)[C@@H](Cc2ccccc2)C1)c1cc(C2CC2)on1	IC50	'='	247	nM	6.61		877887	UO_0000065	12.13	0.24	3.83	5.7	0	CHEMBL5734901	SMYD3 Biochemical Assay: The assays were all performed in a buffer consisting of 25 mM Tris-Cl pH 8.0
CHEMBL5949890		None	541.72	1	3.51	BDBM433273	CC(C)(NC1CCN(S(=O)(=O)N2[C@@H]3CC[C@H]2C[C@@H](NC(=O)c2cc(C4CC4)on2)C3)CC1)c1ccccc1	IC50	'='	117	nM	6.93		878156	UO_0000065	12.8	0.25	3.42	6.43	0	CHEMBL5734901	SMYD3 Biochemical Assay: The assays were all performed in a buffer consisting of 25 mM Tris-Cl pH 8.0
CHEMBL5947406		None	451.59	0	1.55	BDBM433010	CCC1CN(S(=O)(=O)N2[C@@H]3CC[C@H]2C[C@@H](NC(=O)c2cc(C4CC4)on2)C3)CCN1C	IC50	'='	293	nM	6.53		877893	UO_0000065	14.47	0.29	4.98	6.6	0	CHEMBL5734901	SMYD3 Biochemical Assay: The assays were all performed in a buffer consisting of 25 mM Tris-Cl pH 8.0
CHEMBL5898247		None	424.57	0	1.81	BDBM433110	C[C@H]1C[C@@H](NC(=O)c2cc(C3CC3)on2)CCN1S(=O)(=O)CC[C@H]1CCN(C)C1	IC50	'='	2.77	nM	8.56		877993	UO_0000065	20.16	0.4	6.75	8.94	0	CHEMBL5734901	SMYD3 Biochemical Assay: The assays were all performed in a buffer consisting of 25 mM Tris-Cl pH 8.0
CHEMBL6059452		None	438.59	0	2.19	BDBM433119	C[C@H]1C[C@@H](NC(=O)c2cc(C3CC3)on2)CCN1S(=O)(=O)CC1CCC(N(C)C)C1	IC50	'='	3.5	nM	8.46		878002	UO_0000065	19.28	0.38	6.27	8.83	0	CHEMBL5734901	SMYD3 Biochemical Assay: The assays were all performed in a buffer consisting of 25 mM Tris-Cl pH 8.0
CHEMBL6002824		None	539.7	1	3.12	BDBM433120	O=C(N[C@H]1C[C@H]2CC[C@@H](C1)N2S(=O)(=O)N1CC2(CCN(Cc3ccccc3)CC2)C1)c1cc(C2CC2)on1	IC50	'='	3.87	nM	8.41		878003	UO_0000065	15.59	0.3	5.29	8.5	0	CHEMBL5734901	SMYD3 Biochemical Assay: The assays were all performed in a buffer consisting of 25 mM Tris-Cl pH 8.0
CHEMBL5877796		None	398.46	0	1.55	BDBM432299	N[C@@H](Cc1ccc(O)cc1)C(=O)N1CCC(NC(=O)c2cc(C3CC3)on2)CC1	IC50	'='	486	nM	6.31		877189	UO_0000065	15.84	0.3	4.76	5.19	0	CHEMBL5734901	SMYD3 Biochemical Assay: The assays were all performed in a buffer consisting of 25 mM Tris-Cl pH 8.0
CHEMBL6054311		None	538.39	1	2.4	BDBM432330	NC[C@H](Cc1ccc(O)c(I)c1)C(=O)N1CCC(NC(=O)c2cc(C3CC3)on2)CC1	IC50	'='	42.2	nM	7.38		877213	UO_0000065	13.7	0.32	4.97	6.06	0	CHEMBL5734901	SMYD3 Biochemical Assay: The assays were all performed in a buffer consisting of 25 mM Tris-Cl pH 8.0
CHEMBL5906676		None	375.47	0	0.57	BDBM432393	C[C@@H]1CC(NC(=O)c2cc(C3CC3)on2)CCN1C(=O)CN1CCNCC1	IC50	'='	778	nM	6.11		877276	UO_0000065	16.27	0.31	5.54	6.73	0	CHEMBL5734901	SMYD3 Biochemical Assay: The assays were all performed in a buffer consisting of 25 mM Tris-Cl pH 8.0
CHEMBL6057232		None	390.47	0	1.92	BDBM432617	C[C@H]1C[C@@H](NC(=O)c2cc(C3CC3)on2)CCN1S(=O)(=O)c1cccnc1	IC50	'='	686	nM	6.16		877500	UO_0000065	15.79	0.31	4.24	5.85	0	CHEMBL5734901	SMYD3 Biochemical Assay: The assays were all performed in a buffer consisting of 25 mM Tris-Cl pH 8.0
CHEMBL5422878		None	505.37	1	3.76	7r	O=C1N(Cc2ccccc2)C[C@@H]2[C@@H](c3ccc(Br)cc3)[C@]3(O[C@]12O)C(=O)Nc1ccccc13	IC50	'='	810	nM	6.09			UO_0000065	12.05	0.25	2.33	7.72	0	CHEMBL5332986	Inhibition of GST-tagged SMYD3 (unknown origin) using biotinylated MAP3K2 peptide as substrate incubated for 1 hrs by TR-FRET based assay	B	BAO_0000357	single protein format	Homo sapiens	None	None	None	None				CHEMBL2321643	Histone-lysine N-methyltransferase SMYD3	Homo sapiens	SINGLE PROTEIN	CHEMBL5331080	1	Scientific Literature	Eur J Med Chem	2023	None	TIME = 1.0 hr	INHIBITOR		0.81
CHEMBL5770058		None	405.48	0	0.96	BDBM377877	CC(=O)Nc1ccc(S(=O)(=O)N2CCC(NC(=O)c3cnn(C)c3)CC2)cc1	IC50	'>'	100000	nM			755889	UO_0000065					0	CHEMBL5733491	SMYD3 Biochemical Assay: The assays were all performed in a buffer consisting of 25 mM Tris-Cl pH 8.0
CHEMBL6044535		None	427.6	0	1.1	BDBM378477	CCc1cc(C(=O)N[C@H]2C[C@H]3CC[C@@H](C2)N3S(=O)(=O)N2CCC(N)CC2)ns1	IC50	'='	23.8	nM	7.62		756483	UO_0000065	17.83	0.37	6.52	7.02	0	CHEMBL5733491	SMYD3 Biochemical Assay: The assays were all performed in a buffer consisting of 25 mM Tris-Cl pH 8.0
CHEMBL5765629		None	346.41	0	1.81	BDBM378205	NCCC(=O)N[C@H]1CC[C@H](NC(=O)c2cc3cc(F)ccc3[nH]2)CC1	IC50	'>'	100000	nM			756211	UO_0000065					0	CHEMBL5733491	SMYD3 Biochemical Assay: The assays were all performed in a buffer consisting of 25 mM Tris-Cl pH 8.0
CHEMBL5990581		None	356.43	0	1.45	BDBM378325	NCCC(=O)N[C@H]1CC[C@H](NC(=O)c2cc3ccccc3nc2O)CC1	IC50	'='	21970	nM	4.66		756331	UO_0000065	13.07	0.24	3.21	3.97	0	CHEMBL5733491	SMYD3 Biochemical Assay: The assays were all performed in a buffer consisting of 25 mM Tris-Cl pH 8.0
CHEMBL5905295		None	369.47	0	1.63	BDBM378347	Cc1nc2ccccc2c(C(=O)N[C@H]2CC[C@H](NC(=O)CCN)CC2)c1N	IC50	'='	31620	nM	4.5		756353	UO_0000065	12.18	0.23	2.87	3.65	0	CHEMBL5733491	SMYD3 Biochemical Assay: The assays were all performed in a buffer consisting of 25 mM Tris-Cl pH 8.0
CHEMBL5881861		None	411.55	0	3.04	BDBM378204	COc1ccc2cc(C(C)C(=O)NC(C)C3CCN(C(=O)[C@H](C)N)CC3)ccc2c1	IC50	'='	34860	nM	4.46		756210	UO_0000065	10.83	0.2	1.42	5.27	0	CHEMBL5733491	SMYD3 Biochemical Assay: The assays were all performed in a buffer consisting of 25 mM Tris-Cl pH 8.0
CHEMBL6051485		None	339.39	0	1.4	BDBM378312	NCCC(=O)N[C@H]1CC[C@H](NC(=O)Cc2cc(F)cc(F)c2)CC1	IC50	'>'	100000	nM			756318	UO_0000065					0	CHEMBL5733491	SMYD3 Biochemical Assay: The assays were all performed in a buffer consisting of 25 mM Tris-Cl pH 8.0
CHEMBL5825045		None	286.34	0	1.34	BDBM377911	N[C@H]1CC[C@H](NC(=O)c2ccc3nc(O)cnc3c2)CC1	IC50	'='	60360	nM	4.22		755923	UO_0000065	14.74	0.27	2.88	4.17	0	CHEMBL5733491	SMYD3 Biochemical Assay: The assays were all performed in a buffer consisting of 25 mM Tris-Cl pH 8.0
CHEMBL6060588		None	350.46	0	1.77	BDBM293337	CCc1cc(C(=O)N[C@H]2CC[C@H](NC(=O)C[C@@H](C)N)C[C@H]2CC)no1	IC50	'='	97.3	nM	7.01		559159	UO_0000065	20.01	0.38	5.24	6.36	0	CHEMBL5731515	SMYD3 Biochemical Assay: S-adenosylmethionine (SAM)
CHEMBL5818778		None	374.49	0	2.23	BDBM293349	N[C@H]1CC[C@H](C(=O)N[C@H]2CC[C@H](NC(=O)c3cc(C4CC4)on3)CC2)CC1	IC50	'='	606	nM	6.22		559169	UO_0000065	16.6	0.31	3.99	5.64	0	CHEMBL5731515	SMYD3 Biochemical Assay: S-adenosylmethionine (SAM)
CHEMBL5867323		None	307.4	0	0.12	BDBM378124	CC(NC(=O)c1nccn1C)C1CCN(C(=O)[C@H](C)N)CC1	IC50	'='	64910	nM	4.19		756130	UO_0000065	13.62	0.26	4.07	4.49	0	CHEMBL5733491	SMYD3 Biochemical Assay: The assays were all performed in a buffer consisting of 25 mM Tris-Cl pH 8.0
CHEMBL5813489		None	299.38	0	1.58	BDBM378144	Cc1c(C(=O)N[C@H]2CC[C@H](N)CC2)nnn1-c1ccccc1	IC50	'>'	100000	nM			756150	UO_0000065					0	CHEMBL5733491	SMYD3 Biochemical Assay: The assays were all performed in a buffer consisting of 25 mM Tris-Cl pH 8.0
CHEMBL5773935		None	292.38	0	1.09	BDBM432341	NCCCN1CCC(NC(=O)c2cc(C3CC3)on2)CC1	IC50	'='	3159	nM	5.5		877224	UO_0000065	18.81	0.36	4.41	6.52	0	CHEMBL5734901	SMYD3 Biochemical Assay: The assays were all performed in a buffer consisting of 25 mM Tris-Cl pH 8.0
CHEMBL5943314		None	341.43	0	1.48	BDBM432375	CCS(=O)(=O)N1CCC(NC(=O)c2cc(C3CC3)on2)C[C@@H]1C	IC50	'='	1415	nM	5.85		877258	UO_0000065	17.13	0.35	4.37	6.32	0	CHEMBL5734901	SMYD3 Biochemical Assay: The assays were all performed in a buffer consisting of 25 mM Tris-Cl pH 8.0
CHEMBL5959254		None	410.52	0	2.62	BDBM432634	NCCCC(=O)N1CC[C@@H](NC(=O)c2cc(C3CC3)on2)C[C@@H]1Cc1ccccc1	IC50	'='	1895	nM	5.72		877517	UO_0000065	13.94	0.26	3.1	5.64	0	CHEMBL5734901	SMYD3 Biochemical Assay: The assays were all performed in a buffer consisting of 25 mM Tris-Cl pH 8.0
CHEMBL5439323		None	311.77	0	1.51	11c	O=C(NC1CCN(C(=O)CCl)CC1)c1cc(C2CC2)on1	IC50	'='	370	nM	6.43			UO_0000065	20.63	0.42	4.92	8.53	0	CHEMBL5354141	Inhibition of full length recombinant SMYD3 (unknown origin) measured at 24 hrs	B	BAO_0000357	single protein format	Homo sapiens	None	None	None	None				CHEMBL2321643	Histone-lysine N-methyltransferase SMYD3	Homo sapiens	SINGLE PROTEIN	CHEMBL5352425	1	Scientific Literature	Eur J Med Chem	2022	None	TIME = 24.0 hr	INHIBITOR		370
CHEMBL5665376		None	435.96	0	1.91	Compound 20	C[C@H]1CC(=O)Nc2cc(C(=O)NCCC3CC3)ccc2N1C(=O)N1CC[C@H](N)C1.Cl	IC50	'='	259	nM	6.59			UO_0000065	16.49	0.31	4.68	6.11	0	CHEMBL5665262	Binding affinity to recombinant human SMYD3 expressed in Escherichia coli assessed as catalytic inhibition using DYDNPIFEKFGKGGTYPRRYHVSYHGK-Biotin as substrate by scintillation proximity assay	B	BAO_0000019	assay format	Homo sapiens	None	None	None	None	EFO_ID: MONDO:0004992 | EFO_TERM: cancer			CHEMBL2321643	Histone-lysine N-methyltransferase SMYD3	Homo sapiens	SINGLE PROTEIN	CHEMBL5661986	72	Chemical Probe data from Scientific Literature	SLAS Discov	2021	None		INHIBITOR		2.59
CHEMBL5665433		None	410.52	0	3.17	Compound 33	C[C@H]1CC(=O)Nc2cc(C(=O)N(C)CCC3CC3)ccc2N1C(=O)N1CC2CC2C1	IC50	'='	2640	nM	5.58			UO_0000065	13.59	0.25	2.41	7.65	0	CHEMBL5665262	Binding affinity to recombinant human SMYD3 expressed in Escherichia coli assessed as catalytic inhibition using DYDNPIFEKFGKGGTYPRRYHVSYHGK-Biotin as substrate by scintillation proximity assay	B	BAO_0000019	assay format	Homo sapiens	None	None	None	None	EFO_ID: MONDO:0004992 | EFO_TERM: cancer			CHEMBL2321643	Histone-lysine N-methyltransferase SMYD3	Homo sapiens	SINGLE PROTEIN	CHEMBL5661986	72	Chemical Probe data from Scientific Literature	SLAS Discov	2021	None		INHIBITOR		2.64
CHEMBL5665436		None	371.46	0	3.27	Compound 12	CCCNC(=O)c1ccc2c(c1)NC(=O)CC(C)N2C(=O)c1cccs1	IC50	'='	18000	nM	4.75			UO_0000065	12.77	0.25	1.47	6.04	0	CHEMBL5665262	Binding affinity to recombinant human SMYD3 expressed in Escherichia coli assessed as catalytic inhibition using DYDNPIFEKFGKGGTYPRRYHVSYHGK-Biotin as substrate by scintillation proximity assay	B	BAO_0000019	assay format	Homo sapiens	None	None	None	None	EFO_ID: MONDO:0004992 | EFO_TERM: cancer			CHEMBL2321643	Histone-lysine N-methyltransferase SMYD3	Homo sapiens	SINGLE PROTEIN	CHEMBL5661986	72	Chemical Probe data from Scientific Literature	SLAS Discov	2021	None		INHIBITOR		1.8
CHEMBL4436720		None	432.55	0	2.2	15	CN(C)Cc1ccc(S(=O)(=O)N2CCC(NC(=O)c3cc(C4CC4)on3)CC2)cc1	IC50	'='	79	nM	7.1			UO_0000065	16.42	0.32	4.9	7.42	0	CHEMBL4338950	Inhibition of recombinant N-terminal FLAG/His-tagged SMYD3 (unknown origin) expressed in baculovirus infected insect cells using 3H-SAM as substrate assessed as 3H-MEKK2 methylation incubated for 40 mins by scintillation proximity assay	B	BAO_0000219	cell-based format	Homo sapiens	None	None	None	None				CHEMBL2321643	Histone-lysine N-methyltransferase SMYD3	Homo sapiens	SINGLE PROTEIN	CHEMBL4334548	1	Scientific Literature	ACS Med Chem Lett	2020	None				79
CHEMBL4544413		None	438.59	0	2.24	20	CCN[C@H]1CC[C@H](CS(=O)(=O)N2CCC(NC(=O)c3cc(C4CC4)on3)CC2)CC1	IC50	'='	32	nM	7.5			UO_0000065	17.09	0.34	5.25	7.17	0	CHEMBL4338950	Inhibition of recombinant N-terminal FLAG/His-tagged SMYD3 (unknown origin) expressed in baculovirus infected insect cells using 3H-SAM as substrate assessed as 3H-MEKK2 methylation incubated for 40 mins by scintillation proximity assay	B	BAO_0000219	cell-based format	Homo sapiens	None	None	None	None				CHEMBL2321643	Histone-lysine N-methyltransferase SMYD3	Homo sapiens	SINGLE PROTEIN	CHEMBL4334548	1	Scientific Literature	ACS Med Chem Lett	2020	None				32
CHEMBL4565894		None	466.65	0	3.02	22	CCCCN[C@H]1CC[C@H](CS(=O)(=O)N2CCC(NC(=O)c3cc(C4CC4)on3)CC2)CC1	IC50	'='	32	nM	7.5			UO_0000065	16.06	0.32	4.47	7.17	0	CHEMBL4338950	Inhibition of recombinant N-terminal FLAG/His-tagged SMYD3 (unknown origin) expressed in baculovirus infected insect cells using 3H-SAM as substrate assessed as 3H-MEKK2 methylation incubated for 40 mins by scintillation proximity assay	B	BAO_0000219	cell-based format	Homo sapiens	None	None	None	None				CHEMBL2321643	Histone-lysine N-methyltransferase SMYD3	Homo sapiens	SINGLE PROTEIN	CHEMBL4334548	1	Scientific Literature	ACS Med Chem Lett	2020	None				32
CHEMBL4574989		None	535.11	1	4.08	37	O=C(NC1CCN(S(=O)(=O)C[C@H]2CC[C@H](NCc3ccccc3Cl)CC2)CC1)c1cc(C2CC2)on1	IC50	'='	32	nM	7.5			UO_0000065	14.01	0.28	3.41	7.17	0	CHEMBL4338950	Inhibition of recombinant N-terminal FLAG/His-tagged SMYD3 (unknown origin) expressed in baculovirus infected insect cells using 3H-SAM as substrate assessed as 3H-MEKK2 methylation incubated for 40 mins by scintillation proximity assay	B	BAO_0000219	cell-based format	Homo sapiens	None	None	None	None				CHEMBL2321643	Histone-lysine N-methyltransferase SMYD3	Homo sapiens	SINGLE PROTEIN	CHEMBL4334548	1	Scientific Literature	ACS Med Chem Lett	2020	None				32
CHEMBL5665434		None	413.52	0	2.3	Compound 16	C[C@@H]1CC(=O)Nc2cc(C(=O)NCCC3CC3)ccc2N1C(=O)N1CCC(N)CC1	IC50	'='	201	nM	6.7			UO_0000065	16.19	0.3	4.4	6.21	0	CHEMBL5665262	Binding affinity to recombinant human SMYD3 expressed in Escherichia coli assessed as catalytic inhibition using DYDNPIFEKFGKGGTYPRRYHVSYHGK-Biotin as substrate by scintillation proximity assay	B	BAO_0000019	assay format	Homo sapiens	None	None	None	None	EFO_ID: MONDO:0004992 | EFO_TERM: cancer			CHEMBL2321643	Histone-lysine N-methyltransferase SMYD3	Homo sapiens	SINGLE PROTEIN	CHEMBL5661986	72	Chemical Probe data from Scientific Literature	SLAS Discov	2021	None		INHIBITOR		2.01
CHEMBL5665398		None	455.6	0	3.29	Compound 24	CCN1CCC(N(C)C(=O)N2c3ccc(C(=O)NCCC4CC4)cc3NC(=O)C[C@@H]2C)CC1	IC50	'='	177	nM	6.75			UO_0000065	14.82	0.28	3.46	7.94	0	CHEMBL5665262	Binding affinity to recombinant human SMYD3 expressed in Escherichia coli assessed as catalytic inhibition using DYDNPIFEKFGKGGTYPRRYHVSYHGK-Biotin as substrate by scintillation proximity assay	B	BAO_0000019	assay format	Homo sapiens	None	None	None	None	EFO_ID: MONDO:0004992 | EFO_TERM: cancer			CHEMBL2321643	Histone-lysine N-methyltransferase SMYD3	Homo sapiens	SINGLE PROTEIN	CHEMBL5661986	72	Chemical Probe data from Scientific Literature	SLAS Discov	2021	None		INHIBITOR		1.77
CHEMBL5431436		None	590.11	1	4.59	EPZ031686	O=C1Cc2cc(C(=O)N[C@H]3C[C@H]4CC[C@@H](C3)C4S(=O)(=O)CC3CCN(CCCC(F)(F)F)CC3)c(Cl)cc2N1	IC50	'='	689	nM	6.16			UO_0000065	10.44	0.22	1.57	6.45	0	CHEMBL5354141	Inhibition of full length recombinant SMYD3 (unknown origin) measured at 24 hrs	B	BAO_0000357	single protein format	Homo sapiens	None	None	None	None				CHEMBL2321643	Histone-lysine N-methyltransferase SMYD3	Homo sapiens	SINGLE PROTEIN	CHEMBL5352425	1	Scientific Literature	Eur J Med Chem	2022	None	TIME = 24.0 hr	INHIBITOR		689
CHEMBL3798741		None	591.1	1	3.94	EPZ031686	O=C1Cc2cc(C(=O)N[C@H]3C[C@H]4CC[C@@H](C3)N4S(=O)(=O)CC3CCN(CCCC(F)(F)F)CC3)c(Cl)cc2N1	IC50	'='	36	nM	7.44			UO_0000065	12.59	0.26	3.5	7.53	0	CHEMBL3803120	Inhibition of human SMYD3 expressed in HEK293T/17 cells using FLAG-tagged MEKK2 as substrate incubated for 30 mins in low air flow area followed by incubation for 24 hrs at 37 degC by Western blot analysis	B	BAO_0000219	cell-based format	Homo sapiens	None	None	HEK-293T	None				CHEMBL2321643	Histone-lysine N-methyltransferase SMYD3	Homo sapiens	SINGLE PROTEIN	CHEMBL3797202	1	Scientific Literature	ACS Med Chem Lett	2016	CHEMBL3706569				36
CHEMBL6047259		None	350.42	0	0.42	BDBM293367	NC[C@@H](O)CC(=O)N[C@H]1CC[C@H](NC(=O)c2cc(C3CC3)on2)CC1	IC50	'='	1075	nM	5.97		559184	UO_0000065	17.03	0.33	5.55	4.57	0	CHEMBL5731515	SMYD3 Biochemical Assay: S-adenosylmethionine (SAM)
CHEMBL5959525		None	360.46	0	1.84	BDBM293368	N[C@H]1CC[C@H](C(=O)N[C@H]2CC[C@H](NC(=O)c3cc(C4CC4)on3)CC2)C1	IC50	'='	562	nM	6.25		559185	UO_0000065	17.34	0.33	4.41	5.67	0	CHEMBL5731515	SMYD3 Biochemical Assay: S-adenosylmethionine (SAM)
CHEMBL5941022		None	364.45	0	0.76	BDBM293340	NCCC(=O)N(CCO)[C@H]1CC[C@H](NC(=O)c2cc(C3CC3)on2)CC1	IC50	'='	883	nM	6.05		559188	UO_0000065	16.61	0.32	5.29	4.97	0	CHEMBL5731515	SMYD3 Biochemical Assay: S-adenosylmethionine (SAM)
CHEMBL5820772		None	438.57	0	3.4	BDBM293390	C[C@H](N)CC(=O)N[C@H]1CC[C@H](N(CCc2ccccc2)C(=O)c2cc(C3CC3)on2)CC1	IC50	'='	11580	nM	4.94		559207	UO_0000065	11.26	0.21	1.54	4.87	0	CHEMBL5731515	SMYD3 Biochemical Assay: S-adenosylmethionine (SAM)
CHEMBL3797949		None	496.03	0	1.49	14	CNC1CCN(S(=O)(=O)N2[C@@H]3CC[C@H]2C[C@@H](NC(=O)c2cc4c(cc2Cl)NC(=O)C4)C3)CC1	IC50	'='	420	nM	6.38			UO_0000065	12.86	0.26	4.89	5.75	0	CHEMBL3803120	Inhibition of human SMYD3 expressed in HEK293T/17 cells using FLAG-tagged MEKK2 as substrate incubated for 30 mins in low air flow area followed by incubation for 24 hrs at 37 degC by Western blot analysis	B	BAO_0000219	cell-based format	Homo sapiens	None	None	HEK-293T	None				CHEMBL2321643	Histone-lysine N-methyltransferase SMYD3	Homo sapiens	SINGLE PROTEIN	CHEMBL3797202	1	Scientific Literature	ACS Med Chem Lett	2016	CHEMBL3706569				420
CHEMBL3798012		None	539.1	1	1.98	9	O=C1Cc2cc(C(=O)N[C@H]3C[C@H]4CC[C@@H](C3)N4S(=O)(=O)CC3CCN(CCCO)CC3)c(Cl)cc2N1	IC50	'='	760	nM	6.12			UO_0000065	11.35	0.23	4.14	5.14	0	CHEMBL3803120	Inhibition of human SMYD3 expressed in HEK293T/17 cells using FLAG-tagged MEKK2 as substrate incubated for 30 mins in low air flow area followed by incubation for 24 hrs at 37 degC by Western blot analysis	B	BAO_0000219	cell-based format	Homo sapiens	None	None	HEK-293T	None				CHEMBL2321643	Histone-lysine N-methyltransferase SMYD3	Homo sapiens	SINGLE PROTEIN	CHEMBL3797202	1	Scientific Literature	ACS Med Chem Lett	2016	CHEMBL3706569				760
CHEMBL4578147		None	514.69	1	3.73	39	Cc1cccc(CN[C@H]2CC[C@H](CS(=O)(=O)N3CCC(NC(=O)c4cc(C5CC5)on4)CC3)CC2)c1	IC50	'='	10	nM	8			UO_0000065	15.54	0.3	4.27	7.65	0	CHEMBL4338950	Inhibition of recombinant N-terminal FLAG/His-tagged SMYD3 (unknown origin) expressed in baculovirus infected insect cells using 3H-SAM as substrate assessed as 3H-MEKK2 methylation incubated for 40 mins by scintillation proximity assay	B	BAO_0000219	cell-based format	Homo sapiens	None	None	None	None				CHEMBL2321643	Histone-lysine N-methyltransferase SMYD3	Homo sapiens	SINGLE PROTEIN	CHEMBL4334548	1	Scientific Literature	ACS Med Chem Lett	2020	None				10
CHEMBL4476167		None	506.59	1	3.32	49	O=C(NC1CCN(S(=O)(=O)[C@H]2CC[C@H](NCCCC(F)(F)F)CC2)CC1)c1cc(C2CC2)on1	IC50	'='	6.3	nM	8.2			UO_0000065	16.19	0.33	4.88	7.84	0	CHEMBL4338950	Inhibition of recombinant N-terminal FLAG/His-tagged SMYD3 (unknown origin) expressed in baculovirus infected insect cells using 3H-SAM as substrate assessed as 3H-MEKK2 methylation incubated for 40 mins by scintillation proximity assay	B	BAO_0000219	cell-based format	Homo sapiens	None	None	None	None				CHEMBL2321643	Histone-lysine N-methyltransferase SMYD3	Homo sapiens	SINGLE PROTEIN	CHEMBL4334548	1	Scientific Literature	ACS Med Chem Lett	2020	None				6.3
CHEMBL1511440		None	401.89	0	3.68	4	CCOC(=O)N1CCN(C(=O)c2ccc3c(Cl)c4c(nc3c2)CCCC4)CC1	IC50	'='	4780	nM	5.32			UO_0000065	13.24	0.26	1.64	8.48	0	CHEMBL4306860	Inhibition of SMYD3 (unknown origin) using MAP3K2 peptide as substrate pretreated for 30 mins followed by substrate addition and measured after 30 mins by MTase Glo reagent based luminescence assay	B	BAO_0000357	single protein format	Homo sapiens	None	None	None	None				CHEMBL2321643	Histone-lysine N-methyltransferase SMYD3	Homo sapiens	SINGLE PROTEIN	CHEMBL4304770	1	Scientific Literature	ACS Med Chem Lett	2019	None				4.78
CHEMBL4584168		None	444.96	0	3.26	20	CCCOC(=O)N1CCN(C(=O)c2ccc3c(Cl)c4c(nc3c2)CC(CN)CC4)CC1	IC50	'='	380	nM	6.42			UO_0000065	14.43	0.28	3.16	7.23	0	CHEMBL4306860	Inhibition of SMYD3 (unknown origin) using MAP3K2 peptide as substrate pretreated for 30 mins followed by substrate addition and measured after 30 mins by MTase Glo reagent based luminescence assay	B	BAO_0000357	single protein format	Homo sapiens	None	None	None	None				CHEMBL2321643	Histone-lysine N-methyltransferase SMYD3	Homo sapiens	SINGLE PROTEIN	CHEMBL4304770	1	Scientific Literature	ACS Med Chem Lett	2019	None				0.38
CHEMBL4450161		None	429.95	0	4.63	18	CCCOC(=O)N1CCN(C(=O)c2ccc3c(Cl)c4c(nc3c2)CCCC4C)CC1	IC50	'='	5200	nM	5.28			UO_0000065	12.29	0.24	0.65	8.42	0	CHEMBL4306860	Inhibition of SMYD3 (unknown origin) using MAP3K2 peptide as substrate pretreated for 30 mins followed by substrate addition and measured after 30 mins by MTase Glo reagent based luminescence assay	B	BAO_0000357	single protein format	Homo sapiens	None	None	None	None				CHEMBL2321643	Histone-lysine N-methyltransferase SMYD3	Homo sapiens	SINGLE PROTEIN	CHEMBL4304770	1	Scientific Literature	ACS Med Chem Lett	2019	None				5.2
CHEMBL5745005		None	297.34	0	0.44	BDBM321287	C=CS(=O)(=O)N1CC(NC(=O)c2cc(C3CC3)on2)C1	IC50	'>'	10000	nM			630414	UO_0000065					0	CHEMBL5732212	SMYD3 biochemical assay: The assays were all performed in a buffer consisting of 25 mM Tris-Cl pH 8.0
CHEMBL4584607		None	410.54	0	1.59	12	NC[C@H]1CC[C@H](S(=O)(=O)N2CCC(NC(=O)c3cc(C4CC4)on3)CC2)CC1	IC50	'='	25	nM	7.6			UO_0000065	18.52	0.37	6.01	6.41	0	CHEMBL4338950	Inhibition of recombinant N-terminal FLAG/His-tagged SMYD3 (unknown origin) expressed in baculovirus infected insect cells using 3H-SAM as substrate assessed as 3H-MEKK2 methylation incubated for 40 mins by scintillation proximity assay	B	BAO_0000219	cell-based format	Homo sapiens	None	None	None	None				CHEMBL2321643	Histone-lysine N-methyltransferase SMYD3	Homo sapiens	SINGLE PROTEIN	CHEMBL4334548	1	Scientific Literature	ACS Med Chem Lett	2020	None				25
CHEMBL6052278		None	378.47	0	1.15	BDBM293374	NCCC(=O)N(CCCO)[C@H]1CC[C@H](NC(=O)c2cc(C3CC3)on2)CC1	IC50	'='	1200	nM	5.92		559191	UO_0000065	15.64	0.3	4.77	4.87	0	CHEMBL5731515	SMYD3 Biochemical Assay: S-adenosylmethionine (SAM)
CHEMBL5748260		None	311.36	0	0.83	BDBM321296	C=CS(=O)(=O)N1CCC(NC(=O)c2cc(C3CC3)on2)C1	IC50	'>'	50000	nM			630423	UO_0000065					0	CHEMBL5732212	SMYD3 biochemical assay: The assays were all performed in a buffer consisting of 25 mM Tris-Cl pH 8.0
CHEMBL5819941		None	319.41	0	0.37	BDBM378227	CC(NC(=O)c1ccc(N)cn1)C1CCN(C(=O)[C@H](C)N)CC1	IC50	'>'	100000	nM			756233	UO_0000065					0	CHEMBL5733491	SMYD3 Biochemical Assay: The assays were all performed in a buffer consisting of 25 mM Tris-Cl pH 8.0
CHEMBL5994769		None	320.74	0	3.36	BDBM378228	N[C@H]1CC[C@H](NC(=O)c2ccc(Cl)cc2C(F)(F)F)CC1	IC50	'>'	100000	nM			756234	UO_0000065					0	CHEMBL5733491	SMYD3 Biochemical Assay: The assays were all performed in a buffer consisting of 25 mM Tris-Cl pH 8.0
CHEMBL5884790		None	439.6	0	3.04	BDBM378210	Cc1cccc(Cn2nc(C(C)(C)C)cc2C(=O)N[C@H]2CC[C@H](NC(=O)CCN)CC2)c1	IC50	'>'	100000	nM			756216	UO_0000065					0	CHEMBL5733491	SMYD3 Biochemical Assay: The assays were all performed in a buffer consisting of 25 mM Tris-Cl pH 8.0
CHEMBL6002288		None	272.35	0	1.49	BDBM378277	N[C@H]1CC[C@H](NC(=O)Cc2c[nH]c3cccnc23)CC1	IC50	'>'	100000	nM			756283	UO_0000065					0	CHEMBL5733491	SMYD3 Biochemical Assay: The assays were all performed in a buffer consisting of 25 mM Tris-Cl pH 8.0
CHEMBL5839803		None	239.36	0	0.89	BDBM378174	N[C@H]1CC[C@H](NC(=O)[C@H]2CC[C@H](N)CC2)CC1	IC50	'>'	100000	nM			756180	UO_0000065					0	CHEMBL5733491	SMYD3 Biochemical Assay: The assays were all performed in a buffer consisting of 25 mM Tris-Cl pH 8.0
CHEMBL5966155		None	358.44	0	1.08	BDBM378322	C[C@@H](N)CC(=O)N[C@H]1CC[C@H](NC(=O)c2ccc3c(c2)CC(=O)N3)CC1	IC50	'='	260	nM	6.58		756328	UO_0000065	18.37	0.35	5.51	5.81	0	CHEMBL5733491	SMYD3 Biochemical Assay: The assays were all performed in a buffer consisting of 25 mM Tris-Cl pH 8.0
CHEMBL5914873		None	276.37	0	1.69	BDBM378400	N[C@H]1CC[C@H](NC(=O)c2nc3ccncc3s2)CC1	IC50	'>'	50000	nM			756406	UO_0000065					0	CHEMBL5733491	SMYD3 Biochemical Assay: The assays were all performed in a buffer consisting of 25 mM Tris-Cl pH 8.0
CHEMBL5803967		None	378.47	0	1.15	BDBM293386	C[C@@H](N)CC(=O)N[C@H]1CC[C@H](N(CCO)C(=O)c2cc(C3CC3)on2)CC1	IC50	'='	14470	nM	4.84		559203	UO_0000065	12.79	0.24	3.69	3.98	0	CHEMBL5731515	SMYD3 Biochemical Assay: S-adenosylmethionine (SAM)
CHEMBL5775241		None	402.54	0	2.96	BDBM432566	C[C@H]1C[C@H](NC(=O)c2cc(C3CC3)on2)CCN1C(=O)CC1(CN)CCCCC1	IC50	'>'	10000	nM			877449	UO_0000065					0	CHEMBL5734901	SMYD3 Biochemical Assay: The assays were all performed in a buffer consisting of 25 mM Tris-Cl pH 8.0
CHEMBL5918027		None	388.51	0	2.3	BDBM432605	C[C@H](C(=O)N1CC[C@@H](NC(=O)c2cc(C3CC3)on2)C[C@H]1C)C1CCNCC1	IC50	'='	1168	nM	5.93		877488	UO_0000065	15.27	0.29	3.63	6.78	0	CHEMBL5734901	SMYD3 Biochemical Assay: The assays were all performed in a buffer consisting of 25 mM Tris-Cl pH 8.0
CHEMBL5813468		None	374.49	0	2.15	BDBM432370	C[C@H]1CC(NC(=O)c2cc(C3CC3)on2)CCN1C(=O)CCN1CCCC1	IC50	'='	12439	nM	4.91		877253	UO_0000065	13.1	0.25	2.76	6.23	0	CHEMBL5734901	SMYD3 Biochemical Assay: The assays were all performed in a buffer consisting of 25 mM Tris-Cl pH 8.0
CHEMBL5778379		None	341.43	0	1.48	BDBM432376	CCS(=O)(=O)N1CCC(NC(=O)c2cc(C3CC3)on2)C[C@H]1C	IC50	'='	7307	nM	5.14		877259	UO_0000065	15.04	0.3	3.66	5.55	0	CHEMBL5734901	SMYD3 Biochemical Assay: The assays were all performed in a buffer consisting of 25 mM Tris-Cl pH 8.0
CHEMBL5984092		None	306.37	0	0.62	BDBM432382	C[C@@H]1CC(NC(=O)c2cc(C3CC3)on2)CCN1C(=O)CN	IC50	'='	22111	nM	4.66		877265	UO_0000065	15.2	0.29	4.04	4.59	0	CHEMBL5734901	SMYD3 Biochemical Assay: The assays were all performed in a buffer consisting of 25 mM Tris-Cl pH 8.0
CHEMBL5935350		None	412.49	0	1.94	BDBM432307	C[C@@H]1CC(NC(=O)c2cc(C3CC3)on2)CCN1C(=O)[C@@H](N)Cc1ccc(O)cc1	IC50	'='	2969	nM	5.53		877192	UO_0000065	13.4	0.25	3.59	4.54	0	CHEMBL5734901	SMYD3 Biochemical Assay: The assays were all performed in a buffer consisting of 25 mM Tris-Cl pH 8.0
CHEMBL5867425		None	374.49	0	2	BDBM432321	CN1CCC(CC(=O)N2CCC(NC(=O)c3cc(C4CC4)on3)CC2)CC1	IC50	'='	5080	nM	5.29		877204	UO_0000065	14.14	0.27	3.29	6.73	0	CHEMBL5734901	SMYD3 Biochemical Assay: The assays were all performed in a buffer consisting of 25 mM Tris-Cl pH 8.0
CHEMBL5954740		None	424.91	0	2.57	BDBM432618	C[C@H]1C[C@@H](NC(=O)c2cc(C3CC3)on2)CCN1S(=O)(=O)c1ccc(Cl)nc1	IC50	'='	1884	nM	5.72		877501	UO_0000065	13.47	0.28	3.15	5.43	0	CHEMBL5734901	SMYD3 Biochemical Assay: The assays were all performed in a buffer consisting of 25 mM Tris-Cl pH 8.0
CHEMBL5784244		None	376.5	0	2.43	BDBM432519	CC(C)(C)C1CC(NC(=O)c2cc(C3CC3)on2)CCN1C(=O)CCCN	IC50	'='	6316	nM	5.2		877402	UO_0000065	13.81	0.26	2.77	5.12	0	CHEMBL5734901	SMYD3 Biochemical Assay: The assays were all performed in a buffer consisting of 25 mM Tris-Cl pH 8.0
CHEMBL5981771		None	388.51	0	2.57	BDBM432526	C[C@H]1CC(NC(=O)c2cc(C3CC3)on2)CCN1C(=O)CC1CCCC(N)C1	IC50	'='	2384	nM	5.62		877409	UO_0000065	14.47	0.27	3.05	5.54	0	CHEMBL5734901	SMYD3 Biochemical Assay: The assays were all performed in a buffer consisting of 25 mM Tris-Cl pH 8.0
CHEMBL5825783		None	399.51	0	1.89	BDBM432537	CC(C)OCCS(=O)(=O)N1CC[C@H](NC(=O)c2cc(C3CC3)on2)C[C@@H]1C	IC50	'='	3465	nM	5.46		877420	UO_0000065	13.67	0.28	3.57	5.37	0	CHEMBL5734901	SMYD3 Biochemical Assay: The assays were all performed in a buffer consisting of 25 mM Tris-Cl pH 8.0
CHEMBL5813839		None	369.49	0	2.26	BDBM432540	CCCCS(=O)(=O)N1CC[C@H](NC(=O)c2cc(C3CC3)on2)C[C@H]1C	IC50	'>'	10000	nM			877423	UO_0000065					0	CHEMBL5734901	SMYD3 Biochemical Assay: The assays were all performed in a buffer consisting of 25 mM Tris-Cl pH 8.0
CHEMBL6063699		None	371.46	0	1.11	BDBM432548	COCCS(=O)(=O)N1CC[C@@H](NC(=O)c2cc(C3CC3)on2)C[C@@H]1C	IC50	'>'	10000	nM			877431	UO_0000065					0	CHEMBL5734901	SMYD3 Biochemical Assay: The assays were all performed in a buffer consisting of 25 mM Tris-Cl pH 8.0
CHEMBL5929731		None	369.49	0	2.12	BDBM432550	CC(C)CS(=O)(=O)N1CC[C@@H](NC(=O)c2cc(C3CC3)on2)C[C@H]1C	IC50	'='	9447	nM	5.03		877433	UO_0000065	13.6	0.27	2.9	5.43	0	CHEMBL5734901	SMYD3 Biochemical Assay: The assays were all performed in a buffer consisting of 25 mM Tris-Cl pH 8.0
CHEMBL5809029		None	390.47	0	1.92	BDBM432575	C[C@H]1C[C@@H](NC(=O)c2cc(C3CC3)on2)CCN1S(=O)(=O)c1ccccn1	IC50	'='	154	nM	6.81		877458	UO_0000065	17.45	0.34	4.89	6.46	0	CHEMBL5734901	SMYD3 Biochemical Assay: The assays were all performed in a buffer consisting of 25 mM Tris-Cl pH 8.0
CHEMBL5917972		None	353.44	0	1.63	BDBM432576	C[C@H]1C[C@@H](NC(=O)c2cc(C3CC3)on2)CCN1S(=O)(=O)C1CC1	IC50	'='	3634	nM	5.44		877459	UO_0000065	15.39	0.31	3.81	5.88	0	CHEMBL5734901	SMYD3 Biochemical Assay: The assays were all performed in a buffer consisting of 25 mM Tris-Cl pH 8.0
CHEMBL5845047		None	382.49	0	1.48	BDBM432577	C[C@H]1C[C@@H](NC(=O)c2cc(C3CC3)on2)CCN1S(=O)(=O)N1CCCC1	IC50	'='	654	nM	6.18		877460	UO_0000065	16.17	0.32	4.7	6.46	0	CHEMBL5734901	SMYD3 Biochemical Assay: The assays were all performed in a buffer consisting of 25 mM Tris-Cl pH 8.0
CHEMBL5942279		None	342.42	0	0.6	BDBM432578	CNS(=O)(=O)N1CC[C@H](NC(=O)c2cc(C3CC3)on2)C[C@@H]1C	IC50	'='	2893	nM	5.54		877461	UO_0000065	16.18	0.33	4.94	5.3	0	CHEMBL5734901	SMYD3 Biochemical Assay: The assays were all performed in a buffer consisting of 25 mM Tris-Cl pH 8.0
CHEMBL5759170		None	386.5	0	2.18	BDBM432431	C[C@H]1CC(NC(=O)c2cc(C3CC3)on2)CCN1C(=O)C1CC2(CC(N)C2)C1	IC50	'='	1304	nM	5.88		877314	UO_0000065	15.23	0.29	3.7	5.8	0	CHEMBL5734901	SMYD3 Biochemical Assay: The assays were all performed in a buffer consisting of 25 mM Tris-Cl pH 8.0
CHEMBL6046732		None	399.51	0	1.89	BDBM432585	CC(C)OCCS(=O)(=O)N1CC[C@H](NC(=O)c2cc(C3CC3)on2)C[C@H]1C	IC50	'>'	10000	nM			877468	UO_0000065					0	CHEMBL5734901	SMYD3 Biochemical Assay: The assays were all performed in a buffer consisting of 25 mM Tris-Cl pH 8.0
CHEMBL5846925		None	486.64	0	2.78	BDBM433045	CN(CCc1ccccc1)CCS(=O)(=O)N1[C@@H]2CC[C@H]1C[C@@H](NC(=O)c1cc(C3CC3)on1)C2	IC50	'='	584	nM	6.23		877928	UO_0000065	12.81	0.25	3.45	6.51	0	CHEMBL5734901	SMYD3 Biochemical Assay: The assays were all performed in a buffer consisting of 25 mM Tris-Cl pH 8.0
CHEMBL5817493		None	553.73	1	3.16	BDBM433065	O=C(N[C@H]1C[C@H]2CC[C@@H](C1)N2S(=O)(=O)N1CC2(CCN(CCc3ccccc3)CC2)C1)c1cc(C2CC2)on1	IC50	'='	0.76	nM	9.12		877948	UO_0000065	16.47	0.32	5.96	9.21	0	CHEMBL5734901	SMYD3 Biochemical Assay: The assays were all performed in a buffer consisting of 25 mM Tris-Cl pH 8.0
CHEMBL5989847		None	410.54	0	1.73	BDBM433069	C[C@H]1C[C@@H](NC(=O)c2cc(C3CC3)on2)CCN1S(=O)(=O)[C@H]1CC[C@H](N)CC1	IC50	'='	1.03	nM	8.99		877952	UO_0000065	21.89	0.44	7.26	7.58	0	CHEMBL5734901	SMYD3 Biochemical Assay: The assays were all performed in a buffer consisting of 25 mM Tris-Cl pH 8.0
CHEMBL5941012		None	467.59	0	0.57	BDBM433088	O=C(N[C@H]1C[C@H]2CC[C@@H](C1)N2S(=O)(=O)N1CCC(NCCO)CC1)c1cc(C2CC2)on1	IC50	'='	1.85	nM	8.73		877971	UO_0000065	18.68	0.37	8.16	6.82	0	CHEMBL5734901	SMYD3 Biochemical Assay: The assays were all performed in a buffer consisting of 25 mM Tris-Cl pH 8.0
CHEMBL5871188		None	437.57	0	1.34	BDBM433092	CC1(N)CCN(S(=O)(=O)N2[C@@H]3CC[C@H]2C[C@@H](NC(=O)c2cc(C4CC4)on2)C3)CC1	IC50	'='	1.9	nM	8.72		877975	UO_0000065	19.93	0.4	7.38	7.16	0	CHEMBL5734901	SMYD3 Biochemical Assay: The assays were all performed in a buffer consisting of 25 mM Tris-Cl pH 8.0
CHEMBL4576240		None	404.49	0	1.59	14	NCc1ccc(S(=O)(=O)N2CCC(NC(=O)c3cc(C4CC4)on3)CC2)cc1	IC50	'='	63	nM	7.2			UO_0000065	17.8	0.35	5.61	6.07	0	CHEMBL4338950	Inhibition of recombinant N-terminal FLAG/His-tagged SMYD3 (unknown origin) expressed in baculovirus infected insect cells using 3H-SAM as substrate assessed as 3H-MEKK2 methylation incubated for 40 mins by scintillation proximity assay	B	BAO_0000219	cell-based format	Homo sapiens	None	None	None	None				CHEMBL2321643	Histone-lysine N-methyltransferase SMYD3	Homo sapiens	SINGLE PROTEIN	CHEMBL4334548	1	Scientific Literature	ACS Med Chem Lett	2020	None				63
CHEMBL4455165		None	501.65	1	2.82	43	O=C(NC1CCN(S(=O)(=O)C[C@H]2CC[C@H](NCc3ccccn3)CC2)CC1)c1cc(C2CC2)on1	IC50	'='	25	nM	7.6			UO_0000065	15.15	0.3	4.78	6.47	0	CHEMBL4338950	Inhibition of recombinant N-terminal FLAG/His-tagged SMYD3 (unknown origin) expressed in baculovirus infected insect cells using 3H-SAM as substrate assessed as 3H-MEKK2 methylation incubated for 40 mins by scintillation proximity assay	B	BAO_0000219	cell-based format	Homo sapiens	None	None	None	None				CHEMBL2321643	Histone-lysine N-methyltransferase SMYD3	Homo sapiens	SINGLE PROTEIN	CHEMBL4334548	1	Scientific Literature	ACS Med Chem Lett	2020	None				25
CHEMBL4549988		None	536.1	1	3.47	44	O=C(NC1CCN(S(=O)(=O)C[C@H]2CC[C@H](NCc3ccc(Cl)cn3)CC2)CC1)c1cc(C2CC2)on1	IC50	'<'	1	nM				UO_0000065					0	CHEMBL4338950	Inhibition of recombinant N-terminal FLAG/His-tagged SMYD3 (unknown origin) expressed in baculovirus infected insect cells using 3H-SAM as substrate assessed as 3H-MEKK2 methylation incubated for 40 mins by scintillation proximity assay	B	BAO_0000219	cell-based format	Homo sapiens	None	None	None	None				CHEMBL2321643	Histone-lysine N-methyltransferase SMYD3	Homo sapiens	SINGLE PROTEIN	CHEMBL4334548	1	Scientific Literature	ACS Med Chem Lett	2020	None				1
CHEMBL3797575		None	481.02	0	1.89	10	O=C1Cc2cc(C(=O)N[C@H]3C[C@H]4CC[C@@H](C3)N4S(=O)(=O)C[C@@H]3CCCNC3)c(Cl)cc2N1	IC50	'='	5	nM	8.3			UO_0000065	17.26	0.35	6.41	7.71	0	CHEMBL3803119	Inhibition of full length N-terminal His-tagged SMYD3 (1 to 428 residues) (unknown origin) expressed in Escherichia coli using N-terminal GST-tagged MEKK2 as substrate preincubated for 30 mins followed by substrate addition by scintillation proximity assay in presence of [3H]SAM	B	BAO_0000019	assay format	Homo sapiens	None	None	None	None				CHEMBL2321643	Histone-lysine N-methyltransferase SMYD3	Homo sapiens	SINGLE PROTEIN	CHEMBL3797202	1	Scientific Literature	ACS Med Chem Lett	2016	None				5
CHEMBL3798404		None	461.59	0	0.88	17	Cc1cc2c(cc1C(=O)N[C@H]1C[C@H]3CC[C@@H](C1)N3S(=O)(=O)N1CCC(N)CC1)CC(=O)N2	IC50	'='	410	nM	6.39			UO_0000065	13.84	0.27	5.51	5.12	0	CHEMBL3803120	Inhibition of human SMYD3 expressed in HEK293T/17 cells using FLAG-tagged MEKK2 as substrate incubated for 30 mins in low air flow area followed by incubation for 24 hrs at 37 degC by Western blot analysis	B	BAO_0000219	cell-based format	Homo sapiens	None	None	HEK-293T	None				CHEMBL2321643	Histone-lysine N-methyltransferase SMYD3	Homo sapiens	SINGLE PROTEIN	CHEMBL3797202	1	Scientific Literature	ACS Med Chem Lett	2016	CHEMBL3706569				410
CHEMBL3798468		None	572.13	1	3.06	EPZ030456	O=C1Cc2cc(C(=O)N[C@H]3C[C@H]4CC[C@@H](C3)N4S(=O)(=O)N3CCC(NCc4ccccc4)CC3)c(Cl)cc2N1	IC50	'='	48	nM	7.32			UO_0000065	12.79	0.26	4.26	6.6	0	CHEMBL3803120	Inhibition of human SMYD3 expressed in HEK293T/17 cells using FLAG-tagged MEKK2 as substrate incubated for 30 mins in low air flow area followed by incubation for 24 hrs at 37 degC by Western blot analysis	B	BAO_0000219	cell-based format	Homo sapiens	None	None	HEK-293T	None				CHEMBL2321643	Histone-lysine N-methyltransferase SMYD3	Homo sapiens	SINGLE PROTEIN	CHEMBL3797202	1	Scientific Literature	ACS Med Chem Lett	2016	CHEMBL3706569				48
CHEMBL3797419		None	380.47	0	0.05	2	NCCCS(=O)(=O)N1CCC(NC(=O)c2ccc3c(c2)CC(=O)N3)CC1	IC50	'>'	10000	nM				UO_0000065					0	CHEMBL3803120	Inhibition of human SMYD3 expressed in HEK293T/17 cells using FLAG-tagged MEKK2 as substrate incubated for 30 mins in low air flow area followed by incubation for 24 hrs at 37 degC by Western blot analysis	B	BAO_0000219	cell-based format	Homo sapiens	None	None	HEK-293T	None				CHEMBL2321643	Histone-lysine N-methyltransferase SMYD3	Homo sapiens	SINGLE PROTEIN	CHEMBL3797202	1	Scientific Literature	ACS Med Chem Lett	2016	CHEMBL3706569				10000
CHEMBL3798745		None	481.02	0	1.89	11	O=C1Cc2cc(C(=O)N[C@H]3C[C@H]4CC[C@@H](C3)N4S(=O)(=O)C[C@H]3CCCNC3)c(Cl)cc2N1	IC50	'='	4	nM	8.4			UO_0000065	17.46	0.36	6.51	7.8	0	CHEMBL3803119	Inhibition of full length N-terminal His-tagged SMYD3 (1 to 428 residues) (unknown origin) expressed in Escherichia coli using N-terminal GST-tagged MEKK2 as substrate preincubated for 30 mins followed by substrate addition by scintillation proximity assay in presence of [3H]SAM	B	BAO_0000019	assay format	Homo sapiens	None	None	None	None				CHEMBL2321643	Histone-lysine N-methyltransferase SMYD3	Homo sapiens	SINGLE PROTEIN	CHEMBL3797202	1	Scientific Literature	ACS Med Chem Lett	2016	None				4
CHEMBL4472455		None	451.95	1	5.25	25	CCCOC(=O)N1CCN(C(=O)c2ccc3c(Cl)cc(-c4ccccc4)nc3c2)C[C@H]1C	IC50	'='	170	nM	6.77			UO_0000065	14.98	0.29	1.52	10.79	0	CHEMBL4306860	Inhibition of SMYD3 (unknown origin) using MAP3K2 peptide as substrate pretreated for 30 mins followed by substrate addition and measured after 30 mins by MTase Glo reagent based luminescence assay	B	BAO_0000357	single protein format	Homo sapiens	None	None	None	None				CHEMBL2321643	Histone-lysine N-methyltransferase SMYD3	Homo sapiens	SINGLE PROTEIN	CHEMBL4304770	1	Scientific Literature	ACS Med Chem Lett	2019	None				0.17
CHEMBL4551647		None	437.93	0	4.86	24	CCCOC(=O)N1CCN(C(=O)c2ccc3c(Cl)cc(-c4ccccc4)nc3c2)CC1	IC50	'='	300	nM	6.52			UO_0000065	14.89	0.29	1.66	10.4	0	CHEMBL4306860	Inhibition of SMYD3 (unknown origin) using MAP3K2 peptide as substrate pretreated for 30 mins followed by substrate addition and measured after 30 mins by MTase Glo reagent based luminescence assay	B	BAO_0000357	single protein format	Homo sapiens	None	None	None	None				CHEMBL2321643	Histone-lysine N-methyltransferase SMYD3	Homo sapiens	SINGLE PROTEIN	CHEMBL4304770	1	Scientific Literature	ACS Med Chem Lett	2019	None				0.3
CHEMBL4521324		None	458.99	0	3.64	21	CCCOC(=O)N1CCN(C(=O)c2ccc3c(Cl)c4c(nc3c2)CC(CN)CC4)[C@@H](C)C1	IC50	'='	67	nM	7.17			UO_0000065	15.63	0.31	3.53	8.08	0	CHEMBL4306860	Inhibition of SMYD3 (unknown origin) using MAP3K2 peptide as substrate pretreated for 30 mins followed by substrate addition and measured after 30 mins by MTase Glo reagent based luminescence assay	B	BAO_0000357	single protein format	Homo sapiens	None	None	None	None				CHEMBL2321643	Histone-lysine N-methyltransferase SMYD3	Homo sapiens	SINGLE PROTEIN	CHEMBL4304770	1	Scientific Literature	ACS Med Chem Lett	2019	None				0.067
CHEMBL4532072		None	429.95	0	4.32	19	CCCOC(=O)N1CCN(C(=O)c2ccc3c(Cl)c4c(nc3c2)CC(C)CC4)CC1	IC50	'='	1000	nM	6			UO_0000065	13.96	0.27	1.68	9.56	0	CHEMBL4306860	Inhibition of SMYD3 (unknown origin) using MAP3K2 peptide as substrate pretreated for 30 mins followed by substrate addition and measured after 30 mins by MTase Glo reagent based luminescence assay	B	BAO_0000357	single protein format	Homo sapiens	None	None	None	None				CHEMBL2321643	Histone-lysine N-methyltransferase SMYD3	Homo sapiens	SINGLE PROTEIN	CHEMBL4304770	1	Scientific Literature	ACS Med Chem Lett	2019	None				1
CHEMBL4448008		None	429.95	0	4.46	7	CCCCOC(=O)N1CCN(C(=O)c2ccc3c(Cl)c4c(nc3c2)CCCC4)CC1	IC50	'='	360	nM	6.44			UO_0000065	14.99	0.29	1.98	10.27	0	CHEMBL4306860	Inhibition of SMYD3 (unknown origin) using MAP3K2 peptide as substrate pretreated for 30 mins followed by substrate addition and measured after 30 mins by MTase Glo reagent based luminescence assay	B	BAO_0000357	single protein format	Homo sapiens	None	None	None	None				CHEMBL2321643	Histone-lysine N-methyltransferase SMYD3	Homo sapiens	SINGLE PROTEIN	CHEMBL4304770	1	Scientific Literature	ACS Med Chem Lett	2019	None				0.36
CHEMBL4461007		None	313.38	0	0.71	1	CS(=O)(=O)N1CCC(NC(=O)c2cc(C3CC3)on2)CC1	IC50	'='	5010	nM	5.3			UO_0000065	16.91	0.34	4.59	5.73	0	CHEMBL4338950	Inhibition of recombinant N-terminal FLAG/His-tagged SMYD3 (unknown origin) expressed in baculovirus infected insect cells using 3H-SAM as substrate assessed as 3H-MEKK2 methylation incubated for 40 mins by scintillation proximity assay	B	BAO_0000219	cell-based format	Homo sapiens	None	None	None	None				CHEMBL2321643	Histone-lysine N-methyltransferase SMYD3	Homo sapiens	SINGLE PROTEIN	CHEMBL4334548	1	Scientific Literature	ACS Med Chem Lett	2020	None				5010
CHEMBL4459722		None	327.41	0	1.1	2	CCS(=O)(=O)N1CCC(NC(=O)c2cc(C3CC3)on2)CC1	IC50	'='	7940	nM	5.1			UO_0000065	15.58	0.32	4	5.51	0	CHEMBL4338950	Inhibition of recombinant N-terminal FLAG/His-tagged SMYD3 (unknown origin) expressed in baculovirus infected insect cells using 3H-SAM as substrate assessed as 3H-MEKK2 methylation incubated for 40 mins by scintillation proximity assay	B	BAO_0000219	cell-based format	Homo sapiens	None	None	None	None				CHEMBL2321643	Histone-lysine N-methyltransferase SMYD3	Homo sapiens	SINGLE PROTEIN	CHEMBL4334548	1	Scientific Literature	ACS Med Chem Lett	2020	None				7940
CHEMBL4536672		None	458.58	0	2.73	17	O=C(NC1CCN(S(=O)(=O)c2ccc(CN3CCCC3)cc2)CC1)c1cc(C2CC2)on1	IC50	'='	16	nM	7.8			UO_0000065	17	0.33	5.07	8.14	0	CHEMBL4338950	Inhibition of recombinant N-terminal FLAG/His-tagged SMYD3 (unknown origin) expressed in baculovirus infected insect cells using 3H-SAM as substrate assessed as 3H-MEKK2 methylation incubated for 40 mins by scintillation proximity assay	B	BAO_0000219	cell-based format	Homo sapiens	None	None	None	None				CHEMBL2321643	Histone-lysine N-methyltransferase SMYD3	Homo sapiens	SINGLE PROTEIN	CHEMBL4334548	1	Scientific Literature	ACS Med Chem Lett	2020	None				16
CHEMBL4563960		None	466.65	0	2.88	24	CC(C)CN[C@H]1CC[C@H](CS(=O)(=O)N2CCC(NC(=O)c3cc(C4CC4)on3)CC2)CC1	IC50	'='	16	nM	7.8			UO_0000065	16.71	0.33	4.92	7.46	0	CHEMBL4338950	Inhibition of recombinant N-terminal FLAG/His-tagged SMYD3 (unknown origin) expressed in baculovirus infected insect cells using 3H-SAM as substrate assessed as 3H-MEKK2 methylation incubated for 40 mins by scintillation proximity assay	B	BAO_0000219	cell-based format	Homo sapiens	None	None	None	None				CHEMBL2321643	Histone-lysine N-methyltransferase SMYD3	Homo sapiens	SINGLE PROTEIN	CHEMBL4334548	1	Scientific Literature	ACS Med Chem Lett	2020	None				16
CHEMBL5748084		None	303.36	0	1.9	BDBM321289	C=CC(=O)N[C@H]1CC[C@H](NC(=O)c2cc(C3CC3)on2)CC1	IC50	'='	74141	nM	4.13		630416	UO_0000065	13.61	0.26	2.23	4.9	0	CHEMBL5732212	SMYD3 biochemical assay: The assays were all performed in a buffer consisting of 25 mM Tris-Cl pH 8.0
CHEMBL5859229		None	558.75	1	3.44	BDBM433047	COCCCN1CCC(CS(=O)(=O)N2CC[C@H](NC(=O)c3cc(C4CC4)on3)C[C@@H]2Cc2ccccc2)CC1	IC50	'='	625	nM	6.2		877930	UO_0000065	11.1	0.22	2.76	5.91	0	CHEMBL5734901	SMYD3 Biochemical Assay: The assays were all performed in a buffer consisting of 25 mM Tris-Cl pH 8.0
CHEMBL6023390		None	453.57	0	0.13	BDBM432981	CN1CCN(S(=O)(=O)N2[C@@H]3CC[C@H]2C[C@@H](NC(=O)c2cc(C4CC4)on2)C3)CC1CO	IC50	'='	122	nM	6.91		877864	UO_0000065	15.24	0.3	6.78	5.8	0	CHEMBL5734901	SMYD3 Biochemical Assay: The assays were all performed in a buffer consisting of 25 mM Tris-Cl pH 8.0
CHEMBL5775435		None	581.66	1	3.8	BDBM433188	O=C(N[C@H]1C[C@H]2CC[C@@H](C1)N2S(=O)(=O)N1CCC(NCc2ccc(C(F)(F)F)cc2)CC1)c1cc(C2CC2)on1	IC50	'='	13.5	nM	7.87		878071	UO_0000065	13.53	0.27	4.07	7.3	0	CHEMBL5734901	SMYD3 Biochemical Assay: The assays were all performed in a buffer consisting of 25 mM Tris-Cl pH 8.0
CHEMBL5936874		None	422.55	0	1.7	BDBM433221	CN1CCC[C@@H](S(=O)(=O)N2[C@@H]3CC[C@H]2C[C@@H](NC(=O)c2cc(C4CC4)on2)C3)C1	IC50	'='	30	nM	7.52		878104	UO_0000065	17.8	0.35	5.82	7.86	0	CHEMBL5734901	SMYD3 Biochemical Assay: The assays were all performed in a buffer consisting of 25 mM Tris-Cl pH 8.0
CHEMBL5831933		None	408.52	0	1.36	BDBM433225	O=C(N[C@H]1C[C@H]2CC[C@@H](C1)N2S(=O)(=O)C[C@@H]1CCCN1)c1cc(C2CC2)on1	IC50	'='	37.1	nM	7.43		878108	UO_0000065	18.19	0.36	6.07	7.11	0	CHEMBL5734901	SMYD3 Biochemical Assay: The assays were all performed in a buffer consisting of 25 mM Tris-Cl pH 8.0
CHEMBL5913552		None	437.57	0	1.05	BDBM433227	C[C@H]1C[C@@H](NC(=O)c2cc(C3CC3)on2)CCN1S(=O)(=O)N1C[C@H]2CC[C@@H](C1)[C@@H]2N	IC50	'='	38.7	nM	7.41		878110	UO_0000065	16.94	0.34	6.36	6.09	0	CHEMBL5734901	SMYD3 Biochemical Assay: The assays were all performed in a buffer consisting of 25 mM Tris-Cl pH 8.0
CHEMBL5902011		None	474.58	0	1.75	BDBM433241	O=C(N[C@H]1C[C@H]2CC[C@@H](C1)N2S(=O)(=O)c1ccc(CNCCO)cc1)c1cc(C2CC2)on1	IC50	'='	51	nM	7.29		878124	UO_0000065	15.37	0.3	5.54	5.84	0	CHEMBL5734901	SMYD3 Biochemical Assay: The assays were all performed in a buffer consisting of 25 mM Tris-Cl pH 8.0
CHEMBL6037612		None	465.62	0	1.94	BDBM433015	CN1CCC(N(C)S(=O)(=O)N2[C@@H]3CCC[C@H]2C[C@H](NC(=O)c2cc(C4CC4)on2)C3)CC1	IC50	'='	309	nM	6.51		877898	UO_0000065	13.98	0.28	4.57	6.58	0	CHEMBL5734901	SMYD3 Biochemical Assay: The assays were all performed in a buffer consisting of 25 mM Tris-Cl pH 8.0
CHEMBL5971215		None	437.57	0	1.21	BDBM433108	CNC1CCN(S(=O)(=O)N2[C@@H]3CC[C@H]2C[C@@H](NC(=O)c2cc(C4CC4)on2)C3)CC1	IC50	'='	2.65	nM	8.58		877991	UO_0000065	19.6	0.39	7.37	7.96	0	CHEMBL5734901	SMYD3 Biochemical Assay: The assays were all performed in a buffer consisting of 25 mM Tris-Cl pH 8.0
CHEMBL6044509		None	431.52	0	2.03	BDBM433037	Nc1cccc(S(=O)(=O)N2C3CCC[C@@H]2C[C@@H](NC(=O)c2cc(C4CC4)on2)C3)n1	IC50	'='	498	nM	6.3		877920	UO_0000065	14.61	0.29	4.27	4.8	0	CHEMBL5734901	SMYD3 Biochemical Assay: The assays were all performed in a buffer consisting of 25 mM Tris-Cl pH 8.0
CHEMBL6059478		None	425.56	0	1.02	BDBM433275	C[C@H]1C[C@@H](NC(=O)c2cc(C3CC3)on2)CCN1S(=O)(=O)N1CCN(C)C[C@@H]1C	IC50	'='	120	nM	6.92		878158	UO_0000065	16.26	0.33	5.9	6.99	0	CHEMBL5734901	SMYD3 Biochemical Assay: The assays were all performed in a buffer consisting of 25 mM Tris-Cl pH 8.0
CHEMBL5792889		None	452.62	0	2.27	BDBM433288	CC(C)Cc1cc(C(=O)N[C@H]2C[C@H]3CC[C@@H](C2)N3S(=O)(=O)CC2CCN(C)CC2)no1	IC50	'='	206	nM	6.69		878171	UO_0000065	14.77	0.29	4.42	6.98	0	CHEMBL5734901	SMYD3 Biochemical Assay: The assays were all performed in a buffer consisting of 25 mM Tris-Cl pH 8.0
CHEMBL5908357		None	437.57	0	1.19	BDBM433127	CC1CN(S(=O)(=O)N2[C@@H]3CC[C@H]2C[C@@H](NC(=O)c2cc(C4CC4)on2)C3)CCC1N	IC50	'='	4.36	nM	8.36		878010	UO_0000065	19.11	0.38	7.17	6.87	0	CHEMBL5734901	SMYD3 Biochemical Assay: The assays were all performed in a buffer consisting of 25 mM Tris-Cl pH 8.0
CHEMBL5754664		None	495.65	0	1.3	BDBM433130	CN(CCCO)C1CCN(S(=O)(=O)N2[C@@H]3CC[C@H]2C[C@@H](NC(=O)c2cc(C4CC4)on2)C3)CC1	IC50	'='	4.57	nM	8.34		878013	UO_0000065	16.83	0.34	7.04	7	0	CHEMBL5734901	SMYD3 Biochemical Assay: The assays were all performed in a buffer consisting of 25 mM Tris-Cl pH 8.0
CHEMBL5857198		None	491.66	0	2.33	BDBM433162	CC(C)CN1C2CCC1CN(S(=O)(=O)N1[C@@H]3CC[C@H]1C[C@@H](NC(=O)c1cc(C4CC4)on1)C3)C2	IC50	'='	8.63	nM	8.06		878045	UO_0000065	16.4	0.32	5.73	8.15	0	CHEMBL5734901	SMYD3 Biochemical Assay: The assays were all performed in a buffer consisting of 25 mM Tris-Cl pH 8.0
CHEMBL5767519		None	481.6	0	2.26	BDBM433061	C[C@@H]1C[C@H](NC(=O)c2cc(C3CC3)on2)CCN1C(=O)c1ccc(OCCN2CCNCC2)cc1	IC50	'='	806	nM	6.09		877944	UO_0000065	12.65	0.24	3.83	6.1	0	CHEMBL5734901	SMYD3 Biochemical Assay: The assays were all performed in a buffer consisting of 25 mM Tris-Cl pH 8.0
CHEMBL5984539		None	520.62	1	3.35	BDBM433075	CCc1cc(C(=O)N[C@H]2C[C@H]3CC[C@@H](C2)N3S(=O)(=O)CC2CCN(CCCC(F)(F)F)CC2)no1	IC50	'='	1.2	nM	8.92		877958	UO_0000065	17.13	0.35	5.57	9.32	0	CHEMBL5734901	SMYD3 Biochemical Assay: The assays were all performed in a buffer consisting of 25 mM Tris-Cl pH 8.0
CHEMBL5961592		None	410.54	0	1.56	BDBM433085	CCc1cc(C(=O)N[C@H]2C[C@H]3CC[C@@H](C2)N3S(=O)(=O)[C@H]2CC[C@H](N)CC2)no1	IC50	'='	1.59	nM	8.8		877968	UO_0000065	21.43	0.43	7.24	7.42	0	CHEMBL5734901	SMYD3 Biochemical Assay: The assays were all performed in a buffer consisting of 25 mM Tris-Cl pH 8.0
CHEMBL5971131		None	425.56	0	0.87	BDBM433028	C[C@H]1CN(S(=O)(=O)N2CCN(C)CC2)[C@@H](C)C[C@H]1NC(=O)c1cc(C2CC2)on1	IC50	'='	418	nM	6.38		877911	UO_0000065	14.99	0.3	5.51	6.44	0	CHEMBL5734901	SMYD3 Biochemical Assay: The assays were all performed in a buffer consisting of 25 mM Tris-Cl pH 8.0
CHEMBL5870831		None	492.94	0	2.75	BDBM432791	O=C(N[C@H]1C[C@H]2CC[C@@H](C1)N2S(=O)(=O)c1cc2oc(=O)[nH]c2cc1Cl)c1cc(C2CC2)on1	IC50	'>'	10000	nM			877674	UO_0000065					0	CHEMBL5734901	SMYD3 Biochemical Assay: The assays were all performed in a buffer consisting of 25 mM Tris-Cl pH 8.0
CHEMBL5749196		None	411.53	0	0.8	BDBM432826	C[C@H]1C[C@@H](NC(=O)c2cc(C3CC3)on2)CCN1S(=O)(=O)N1CCC(N)CC1	IC50	'='	0.8	nM	9.1		877709	UO_0000065	22.11	0.44	8.3	7.47	0	CHEMBL5734901	SMYD3 Biochemical Assay: The assays were all performed in a buffer consisting of 25 mM Tris-Cl pH 8.0
CHEMBL5785817		None	409.51	0	0.43	BDBM432867	C[C@H]1C[C@@H](NC(=O)c2cc(C3CC3)on2)CCN1S(=O)(=O)N1CC2CC1CN2	IC50	'='	6.7	nM	8.17		877750	UO_0000065	19.96	0.4	7.74	7.58	0	CHEMBL5734901	SMYD3 Biochemical Assay: The assays were all performed in a buffer consisting of 25 mM Tris-Cl pH 8.0
CHEMBL6041639		None	453.61	0	1.15	BDBM432887	CN(C)CCNCCCS(=O)(=O)N1[C@@H]2CC[C@H]1C[C@@H](NC(=O)c1cc(C3CC3)on1)C2	IC50	'='	10.9	nM	7.96		877770	UO_0000065	17.55	0.35	6.81	7.39	0	CHEMBL5734901	SMYD3 Biochemical Assay: The assays were all performed in a buffer consisting of 25 mM Tris-Cl pH 8.0
CHEMBL5880073		None	422.55	0	1.61	BDBM432840	O=C(N[C@H]1C[C@H]2CC[C@@H](C1)N2S(=O)(=O)CC1CCNCC1)c1cc(C2CC2)on1	IC50	'='	1	nM	9		877706	UO_0000065	21.3	0.42	7.39	8.61	0	CHEMBL5734901	SMYD3 Biochemical Assay: The assays were all performed in a buffer consisting of 25 mM Tris-Cl pH 8.0
CHEMBL5763132		None	382.49	0	0.83	BDBM432946	CNCCS(=O)(=O)N1[C@@H]2CC[C@H]1C[C@@H](NC(=O)c1cc(C3CC3)on1)C2	IC50	'='	47.2	nM	7.33		877829	UO_0000065	19.15	0.38	6.5	7.01	0	CHEMBL5734901	SMYD3 Biochemical Assay: The assays were all performed in a buffer consisting of 25 mM Tris-Cl pH 8.0
CHEMBL5820943		None	411.53	0	0.63	BDBM432543	C[C@@H]1C[C@@H](NC(=O)c2cc(C3CC3)on2)CCN1S(=O)(=O)N1CCN(C)CC1	IC50	'='	1758	nM	5.75		877426	UO_0000065	13.98	0.28	5.12	5.81	0	CHEMBL5734901	SMYD3 Biochemical Assay: The assays were all performed in a buffer consisting of 25 mM Tris-Cl pH 8.0
CHEMBL5761423		None	403.5	0	2.66	BDBM432544	C[C@H]1C[C@H](NC(=O)c2cc(C3CC3)on2)CCN1S(=O)(=O)Cc1ccccc1	IC50	'>'	10000	nM			877427	UO_0000065					0	CHEMBL5734901	SMYD3 Biochemical Assay: The assays were all performed in a buffer consisting of 25 mM Tris-Cl pH 8.0
CHEMBL5873130		None	450.58	0	3.4	BDBM432609	N[C@H]1CC[C@H](C(=O)N2CC[C@@H](NC(=O)c3cc(C4CC4)on3)C[C@H]2Cc2ccccc2)CC1	IC50	'='	1180	nM	5.93		877492	UO_0000065	13.16	0.25	2.53	5.84	0	CHEMBL5734901	SMYD3 Biochemical Assay: The assays were all performed in a buffer consisting of 25 mM Tris-Cl pH 8.0
CHEMBL6006819		None	334.42	0	1.26	BDBM432496	C[C@@H]1CN(C(=O)CCCN)CC[C@H]1NC(=O)c1cc(C2CC2)on1	IC50	'>'	10000	nM			877379	UO_0000065					0	CHEMBL5734901	SMYD3 Biochemical Assay: The assays were all performed in a buffer consisting of 25 mM Tris-Cl pH 8.0
CHEMBL5895737		None	376.46	0	0.63	BDBM432436	C[C@@H]1CC(NC(=O)c2cc(C3CC3)on2)CCN1C(=O)C1CNCC(O)C1	IC50	'='	2486	nM	5.6		877319	UO_0000065	14.89	0.28	4.97	5.2	0	CHEMBL5734901	SMYD3 Biochemical Assay: The assays were all performed in a buffer consisting of 25 mM Tris-Cl pH 8.0
CHEMBL5915853		None	385.51	0	3.32	BDBM432457	NC1CCC(C(=O)C2CCC(NC(=O)c3cc(C4CC4)on3)C3(CC3)C2)CC1	IC50	'='	245	nM	6.61		877340	UO_0000065	17.15	0.32	3.29	6.73	0	CHEMBL5734901	SMYD3 Biochemical Assay: The assays were all performed in a buffer consisting of 25 mM Tris-Cl pH 8.0
CHEMBL5832801		None	609.47	1	1.91	BDBM432335	NCCC(=O)NC[C@@H](Cc1ccc(O)c(I)c1)C(=O)N1CCC(NC(=O)c2cc(C3CC3)on2)CC1	IC50	'='	1637	nM	5.79		877218	UO_0000065	9.49	0.22	3.88	3.84	0	CHEMBL5734901	SMYD3 Biochemical Assay: The assays were all performed in a buffer consisting of 25 mM Tris-Cl pH 8.0
CHEMBL5826634		None	595.48	1	2.27	BDBM432343	C[C@@H](N)C(=O)NC[C@@H](Cc1ccc(O)c(I)c1)C(=O)N1CCC(NCc2cc(C3CC3)on2)CC1	IC50	'='	8391	nM	5.08		877226	UO_0000065	8.52	0.2	2.81	3.8	0	CHEMBL5734901	SMYD3 Biochemical Assay: The assays were all performed in a buffer consisting of 25 mM Tris-Cl pH 8.0
CHEMBL5785519		None	412.49	0	1.79	BDBM432349	C[C@@H]1CN(C(=O)[C@H](N)Cc2ccc(O)cc2)CCC1NC(=O)c1cc(C2CC2)on1	IC50	'='	14918	nM	4.83		877232	UO_0000065	11.7	0.22	3.04	3.97	0	CHEMBL5734901	SMYD3 Biochemical Assay: The assays were all performed in a buffer consisting of 25 mM Tris-Cl pH 8.0
CHEMBL6036612		None	306.37	0	0.62	BDBM432353	C[C@H]1CC(NC(=O)c2cc(C3CC3)on2)CCN1C(=O)CN	IC50	'='	32523	nM	4.49		877236	UO_0000065	14.65	0.28	3.87	4.42	0	CHEMBL5734901	SMYD3 Biochemical Assay: The assays were all performed in a buffer consisting of 25 mM Tris-Cl pH 8.0
CHEMBL5864389		None	436.56	0	3.53	BDBM432464	N[C@H]1CC[C@H](C(=O)N2CCC(NC(=O)c3cc(C4CC4)on3)C[C@@H]2c2ccccc2)CC1	IC50	'='	7166	nM	5.14		877347	UO_0000065	11.78	0.22	1.61	5.07	0	CHEMBL5734901	SMYD3 Biochemical Assay: The assays were all performed in a buffer consisting of 25 mM Tris-Cl pH 8.0
CHEMBL5778109		None	388.51	0	2.44	BDBM432467	CC1CC(CC(=O)N2CCC(NC(=O)c3cc(C4CC4)on3)C[C@H]2C)CCN1	IC50	'='	506	nM	6.3		877350	UO_0000065	16.21	0.31	3.86	7.2	0	CHEMBL5734901	SMYD3 Biochemical Assay: The assays were all performed in a buffer consisting of 25 mM Tris-Cl pH 8.0
CHEMBL5919100		None	388.51	0	2.44	BDBM432469	CCC1(C(=O)N2CCC(NC(=O)c3cc(C4CC4)on3)C[C@H]2C)CCNCC1	IC50	'='	3178	nM	5.5		877352	UO_0000065	14.15	0.27	3.06	6.29	0	CHEMBL5734901	SMYD3 Biochemical Assay: The assays were all performed in a buffer consisting of 25 mM Tris-Cl pH 8.0
CHEMBL5863545		None	350.42	0	0.37	BDBM432473	C[C@@H]1C[C@H](NC(=O)c2cc(C3CC3)on2)CCN1C(=O)CC(O)CN	IC50	'='	6778	nM	5.17		877356	UO_0000065	14.75	0.28	4.8	4.25	0	CHEMBL5734901	SMYD3 Biochemical Assay: The assays were all performed in a buffer consisting of 25 mM Tris-Cl pH 8.0
CHEMBL3798717		None	259.31	0	0.66	BDBM377919	O=C1Cc2cc(C(=O)NC3CCNCC3)ccc2N1	IC50	'='	12150	nM	4.92		755930	UO_0000065	18.96	0.35	4.26	7	0	CHEMBL5733491	SMYD3 Biochemical Assay: The assays were all performed in a buffer consisting of 25 mM Tris-Cl pH 8.0
CHEMBL5913182		None	261.32	0	2.07	BDBM377927	Cc1cc2[nH]c(C(=O)N[C@H]3CC[C@H](N)CC3)cc2o1	IC50	'='	134080	nM		Outside typical range	755937	UO_0000065					0	CHEMBL5733491	SMYD3 Biochemical Assay: The assays were all performed in a buffer consisting of 25 mM Tris-Cl pH 8.0
CHEMBL5961942		None	235.29	0	0.7	BDBM377935	CC(=O)c1c[nH]c(C(=O)NC2CCNCC2)c1	IC50	'='	45830	nM	4.34		755945	UO_0000065	18.44	0.35	3.64	5.86	0	CHEMBL5733491	SMYD3 Biochemical Assay: The assays were all performed in a buffer consisting of 25 mM Tris-Cl pH 8.0
CHEMBL6022958		None	354.45	0	1.94	BDBM378066	CC(NC(=O)c1ccc2cnccc2c1)C1CCN(C(=O)[C@H](C)N)CC1	IC50	'>'	100000	nM			756072	UO_0000065					0	CHEMBL5733491	SMYD3 Biochemical Assay: The assays were all performed in a buffer consisting of 25 mM Tris-Cl pH 8.0
CHEMBL5949297		None	428.58	0	0.67	BDBM378498	C[C@H]1C[C@H](NC(=O)c2nnc(C3CC3)s2)CCN1S(=O)(=O)N1CCC(N)CC1	IC50	'='	470	nM	6.33		756504	UO_0000065	14.76	0.31	5.66	5.21	0	CHEMBL5733491	SMYD3 Biochemical Assay: The assays were all performed in a buffer consisting of 25 mM Tris-Cl pH 8.0
CHEMBL5753650		None	432.95	0	2.46	BDBM378507	C[C@H]1CC(NC(=O)c2cc3c(cc2Cl)NC(=O)C3)CCN1C(=O)[C@H]1CC[C@H](N)CC1	IC50	'='	2041	nM	5.69		756513	UO_0000065	13.14	0.26	3.23	5.44	0	CHEMBL5733491	SMYD3 Biochemical Assay: The assays were all performed in a buffer consisting of 25 mM Tris-Cl pH 8.0
CHEMBL5939462		None	259.31	0	0.52	BDBM378085	O=C1Cc2cc(C(=O)NC[C@@H]3CCNC3)ccc2N1	IC50	'='	17950	nM	4.75		756091	UO_0000065	18.3	0.34	4.23	6.76	0	CHEMBL5733491	SMYD3 Biochemical Assay: The assays were all performed in a buffer consisting of 25 mM Tris-Cl pH 8.0
CHEMBL6054708		None	344.42	0	0.64	BDBM378086	CN(C(=O)CN)C1CCC(NC(=O)c2ccc3c(c2)CC(=O)N3)CC1	IC50	'='	1250	nM	5.9		756092	UO_0000065	17.14	0.32	5.26	5.65	0	CHEMBL5733491	SMYD3 Biochemical Assay: The assays were all performed in a buffer consisting of 25 mM Tris-Cl pH 8.0
CHEMBL5748691		None	349.46	0	1.1	BDBM378111	CC(NC(=O)c1cn2ccsc2n1)C1CCN(C(=O)[C@H](C)N)CC1	IC50	'>'	100000	nM			756117	UO_0000065					0	CHEMBL5733491	SMYD3 Biochemical Assay: The assays were all performed in a buffer consisting of 25 mM Tris-Cl pH 8.0
CHEMBL5836655		None	262.31	0	1.41	BDBM378020	N[C@H]1CC[C@H](NC(=O)c2ccc3c(c2)OCO3)CC1	IC50	'>'	100000	nM			756026	UO_0000065					0	CHEMBL5733491	SMYD3 Biochemical Assay: The assays were all performed in a buffer consisting of 25 mM Tris-Cl pH 8.0
CHEMBL5781661		None	326.44	0	3.34	BDBM378042	COc1ccc2cc(C(C)C(=O)N[C@H]3CC[C@H](N)CC3)ccc2c1	IC50	'='	76380	nM	4.12		756048	UO_0000065	12.61	0.23	0.78	6.4	0	CHEMBL5733491	SMYD3 Biochemical Assay: The assays were all performed in a buffer consisting of 25 mM Tris-Cl pH 8.0
CHEMBL5812564		None	326.44	0	2.68	BDBM377899	CCn1nc(C)cc1C(=O)NC(c1ccccc1)C1CCNCC1	IC50	'='	69190	nM	4.16		755911	UO_0000065	12.74	0.24	1.48	7.06	0	CHEMBL5733491	SMYD3 Biochemical Assay: The assays were all performed in a buffer consisting of 25 mM Tris-Cl pH 8.0
CHEMBL6057782		None	344.42	0	0.69	BDBM378000	NCCC(=O)NC1CCC(NC(=O)c2ccc3c(c2)CC(=O)N3)CC1	IC50	'='	290	nM	6.54		756008	UO_0000065	18.98	0.36	5.85	5.77	0	CHEMBL5733491	SMYD3 Biochemical Assay: The assays were all performed in a buffer consisting of 25 mM Tris-Cl pH 8.0
CHEMBL5770818		None	345.4	0	0.84	BDBM378001	CCOC(=O)C1(CNC(=O)c2ccc3c(c2)CC(=O)N3)CCNCC1	IC50	'='	56280	nM	4.25		756009	UO_0000065	12.3	0.23	3.41	4.4	0	CHEMBL5733491	SMYD3 Biochemical Assay: The assays were all performed in a buffer consisting of 25 mM Tris-Cl pH 8.0
CHEMBL5928386		None	299.38	0	1.46	BDBM377913	Nc1cc(C(=O)NC(c2ccccc2)C2CCNCC2)n[nH]1	IC50	'='	137240	nM		Outside typical range	755925	UO_0000065					0	CHEMBL5733491	SMYD3 Biochemical Assay: The assays were all performed in a buffer consisting of 25 mM Tris-Cl pH 8.0
CHEMBL5855243		None	422.49	0	1.18	BDBM377918	N[C@@H](Cc1ccc(O)cc1)C(=O)N1CCC(NC(=O)c2ccc3c(c2)CC(=O)N3)CC1	IC50	'='	860	nM	6.07		755929	UO_0000065	14.36	0.27	4.89	4.86	0	CHEMBL5733491	SMYD3 Biochemical Assay: The assays were all performed in a buffer consisting of 25 mM Tris-Cl pH 8.0
CHEMBL5975765		None	247.3	0	1.55	BDBM377928	Cc1cc2[nH]c(C(=O)NC3CCNCC3)cc2o1	IC50	'='	76140	nM	4.12		755938	UO_0000065	16.65	0.31	2.57	5.88	0	CHEMBL5733491	SMYD3 Biochemical Assay: The assays were all performed in a buffer consisting of 25 mM Tris-Cl pH 8.0
CHEMBL4460836		None	438.59	0	2.2	23	CN(C)[C@H]1CC[C@H](CS(=O)(=O)N2CCC(NC(=O)c3cc(C4CC4)on3)CC2)CC1	IC50	'<'	1	nM				UO_0000065					0	CHEMBL4338950	Inhibition of recombinant N-terminal FLAG/His-tagged SMYD3 (unknown origin) expressed in baculovirus infected insect cells using 3H-SAM as substrate assessed as 3H-MEKK2 methylation incubated for 40 mins by scintillation proximity assay	B	BAO_0000219	cell-based format	Homo sapiens	None	None	None	None				CHEMBL2321643	Histone-lysine N-methyltransferase SMYD3	Homo sapiens	SINGLE PROTEIN	CHEMBL4334548	1	Scientific Literature	ACS Med Chem Lett	2020	None				1
CHEMBL4584383		None	506.59	1	3.18	27	O=C(NC1CCN(S(=O)(=O)C[C@H]2CC[C@H](NCCC(F)(F)F)CC2)CC1)c1cc(C2CC2)on1	IC50	'<'	1	nM				UO_0000065					0	CHEMBL4338950	Inhibition of recombinant N-terminal FLAG/His-tagged SMYD3 (unknown origin) expressed in baculovirus infected insect cells using 3H-SAM as substrate assessed as 3H-MEKK2 methylation incubated for 40 mins by scintillation proximity assay	B	BAO_0000219	cell-based format	Homo sapiens	None	None	None	None				CHEMBL2321643	Histone-lysine N-methyltransferase SMYD3	Homo sapiens	SINGLE PROTEIN	CHEMBL4334548	1	Scientific Literature	ACS Med Chem Lett	2020	None				1
CHEMBL4472528		None	518.66	1	3.56	33	O=C(NC1CCN(S(=O)(=O)C[C@H]2CC[C@H](NCc3cccc(F)c3)CC2)CC1)c1cc(C2CC2)on1	IC50	'<'	1	nM				UO_0000065					0	CHEMBL4338950	Inhibition of recombinant N-terminal FLAG/His-tagged SMYD3 (unknown origin) expressed in baculovirus infected insect cells using 3H-SAM as substrate assessed as 3H-MEKK2 methylation incubated for 40 mins by scintillation proximity assay	B	BAO_0000219	cell-based format	Homo sapiens	None	None	None	None				CHEMBL2321643	Histone-lysine N-methyltransferase SMYD3	Homo sapiens	SINGLE PROTEIN	CHEMBL4334548	1	Scientific Literature	ACS Med Chem Lett	2020	None				1
CHEMBL4559031		None	535.11	1	4.08	35	O=C(NC1CCN(S(=O)(=O)C[C@H]2CC[C@H](NCc3ccc(Cl)cc3)CC2)CC1)c1cc(C2CC2)on1	IC50	'<'	1	nM				UO_0000065					0	CHEMBL4338950	Inhibition of recombinant N-terminal FLAG/His-tagged SMYD3 (unknown origin) expressed in baculovirus infected insect cells using 3H-SAM as substrate assessed as 3H-MEKK2 methylation incubated for 40 mins by scintillation proximity assay	B	BAO_0000219	cell-based format	Homo sapiens	None	None	None	None				CHEMBL2321643	Histone-lysine N-methyltransferase SMYD3	Homo sapiens	SINGLE PROTEIN	CHEMBL4334548	1	Scientific Literature	ACS Med Chem Lett	2020	None				1
CHEMBL4460507		None	519.64	1	2.96	46	O=C(NC1CCN(S(=O)(=O)C[C@H]2CC[C@H](NCc3ccc(F)cn3)CC2)CC1)c1cc(C2CC2)on1	IC50	'<'	1	nM				UO_0000065					0	CHEMBL4338950	Inhibition of recombinant N-terminal FLAG/His-tagged SMYD3 (unknown origin) expressed in baculovirus infected insect cells using 3H-SAM as substrate assessed as 3H-MEKK2 methylation incubated for 40 mins by scintillation proximity assay	B	BAO_0000219	cell-based format	Homo sapiens	None	None	None	None				CHEMBL2321643	Histone-lysine N-methyltransferase SMYD3	Homo sapiens	SINGLE PROTEIN	CHEMBL4334548	1	Scientific Literature	ACS Med Chem Lett	2020	None				1
CHEMBL4544590		None	370.48	0	0.81	4	NCCCCS(=O)(=O)N1CCC(NC(=O)c2cc(C3CC3)on2)CC1	IC50	'='	25	nM	7.6			UO_0000065	20.52	0.42	6.79	6.41	0	CHEMBL4338950	Inhibition of recombinant N-terminal FLAG/His-tagged SMYD3 (unknown origin) expressed in baculovirus infected insect cells using 3H-SAM as substrate assessed as 3H-MEKK2 methylation incubated for 40 mins by scintillation proximity assay	B	BAO_0000219	cell-based format	Homo sapiens	None	None	None	None				CHEMBL2321643	Histone-lysine N-methyltransferase SMYD3	Homo sapiens	SINGLE PROTEIN	CHEMBL4334548	1	Scientific Literature	ACS Med Chem Lett	2020	None				25
CHEMBL4437408		None	396.51	0	1.35	11	N[C@H]1CC[C@@H](S(=O)(=O)N2CCC(NC(=O)c3cc(C4CC4)on3)CC2)CC1	IC50	'='	10	nM	8			UO_0000065	20.18	0.4	6.65	6.75	0	CHEMBL4338950	Inhibition of recombinant N-terminal FLAG/His-tagged SMYD3 (unknown origin) expressed in baculovirus infected insect cells using 3H-SAM as substrate assessed as 3H-MEKK2 methylation incubated for 40 mins by scintillation proximity assay	B	BAO_0000219	cell-based format	Homo sapiens	None	None	None	None				CHEMBL2321643	Histone-lysine N-methyltransferase SMYD3	Homo sapiens	SINGLE PROTEIN	CHEMBL4334548	1	Scientific Literature	ACS Med Chem Lett	2020	None				10
CHEMBL5665412		None	411.48	0	4.12	Compound 8	CCCCCNC(=O)c1ccc2c(c1)NC(=O)CC(C)N2C(=O)c1ccccc1F	IC50	'='	24000	nM	4.62			UO_0000065	11.23	0.21	0.5	5.88	0	CHEMBL5665262	Binding affinity to recombinant human SMYD3 expressed in Escherichia coli assessed as catalytic inhibition using DYDNPIFEKFGKGGTYPRRYHVSYHGK-Biotin as substrate by scintillation proximity assay	B	BAO_0000019	assay format	Homo sapiens	None	None	None	None	EFO_ID: MONDO:0004992 | EFO_TERM: cancer			CHEMBL2321643	Histone-lysine N-methyltransferase SMYD3	Homo sapiens	SINGLE PROTEIN	CHEMBL5661986	72	Chemical Probe data from Scientific Literature	SLAS Discov	2021	None		INHIBITOR		2.4
CHEMBL5665411		None	413.52	0	2.22	Compound 22	C[C@H]1CC(=O)Nc2cc(C(=O)NCCC3CC3)ccc2N1C(=O)NC1CCNCC1	IC50	'='	396	nM	6.4			UO_0000065	15.48	0.29	4.18	6.24	0	CHEMBL5665262	Binding affinity to recombinant human SMYD3 expressed in Escherichia coli assessed as catalytic inhibition using DYDNPIFEKFGKGGTYPRRYHVSYHGK-Biotin as substrate by scintillation proximity assay	B	BAO_0000019	assay format	Homo sapiens	None	None	None	None	EFO_ID: MONDO:0004992 | EFO_TERM: cancer			CHEMBL2321643	Histone-lysine N-methyltransferase SMYD3	Homo sapiens	SINGLE PROTEIN	CHEMBL5661986	72	Chemical Probe data from Scientific Literature	SLAS Discov	2021	None		INHIBITOR		3.96
CHEMBL3797749		None	482.01	0	1.23	13	NC1CCN(S(=O)(=O)N2[C@@H]3CC[C@H]2C[C@@H](NC(=O)c2cc4c(cc2Cl)NC(=O)C4)C3)CC1	IC50	'='	1100	nM	5.96			UO_0000065	12.36	0.25	4.73	4.77	0	CHEMBL3803120	Inhibition of human SMYD3 expressed in HEK293T/17 cells using FLAG-tagged MEKK2 as substrate incubated for 30 mins in low air flow area followed by incubation for 24 hrs at 37 degC by Western blot analysis	B	BAO_0000219	cell-based format	Homo sapiens	None	None	HEK-293T	None				CHEMBL2321643	Histone-lysine N-methyltransferase SMYD3	Homo sapiens	SINGLE PROTEIN	CHEMBL3797202	1	Scientific Literature	ACS Med Chem Lett	2016	CHEMBL3706569				1100
CHEMBL3797524		None	460.6	0	1.26	8	CN1C(=O)Cc2cc(C(=O)N[C@H]3C[C@H]4CC[C@@H](C3)N4S(=O)(=O)CC3CCNCC3)ccc21	IC50	'='	3900	nM	5.41			UO_0000065	11.74	0.23	4.15	5.47	0	CHEMBL3803120	Inhibition of human SMYD3 expressed in HEK293T/17 cells using FLAG-tagged MEKK2 as substrate incubated for 30 mins in low air flow area followed by incubation for 24 hrs at 37 degC by Western blot analysis	B	BAO_0000219	cell-based format	Homo sapiens	None	None	HEK-293T	None				CHEMBL2321643	Histone-lysine N-methyltransferase SMYD3	Homo sapiens	SINGLE PROTEIN	CHEMBL3797202	1	Scientific Literature	ACS Med Chem Lett	2016	CHEMBL3706569				3900
CHEMBL3798404		None	461.59	0	0.88	17	Cc1cc2c(cc1C(=O)N[C@H]1C[C@H]3CC[C@@H](C1)N3S(=O)(=O)N1CCC(N)CC1)CC(=O)N2	IC50	'='	16	nM	7.8			UO_0000065	16.89	0.33	6.92	6.24	0	CHEMBL3803119	Inhibition of full length N-terminal His-tagged SMYD3 (1 to 428 residues) (unknown origin) expressed in Escherichia coli using N-terminal GST-tagged MEKK2 as substrate preincubated for 30 mins followed by substrate addition by scintillation proximity assay in presence of [3H]SAM	B	BAO_0000019	assay format	Homo sapiens	None	None	None	None				CHEMBL2321643	Histone-lysine N-methyltransferase SMYD3	Homo sapiens	SINGLE PROTEIN	CHEMBL3797202	1	Scientific Literature	ACS Med Chem Lett	2016	None				16
CHEMBL3798468		None	572.13	1	3.06	EPZ030456	O=C1Cc2cc(C(=O)N[C@H]3C[C@H]4CC[C@@H](C3)N4S(=O)(=O)N3CCC(NCc4ccccc4)CC3)c(Cl)cc2N1	IC50	'='	4	nM	8.4			UO_0000065	14.68	0.29	5.34	7.58	0	CHEMBL3803119	Inhibition of full length N-terminal His-tagged SMYD3 (1 to 428 residues) (unknown origin) expressed in Escherichia coli using N-terminal GST-tagged MEKK2 as substrate preincubated for 30 mins followed by substrate addition by scintillation proximity assay in presence of [3H]SAM	B	BAO_0000019	assay format	Homo sapiens	None	None	None	None				CHEMBL2321643	Histone-lysine N-methyltransferase SMYD3	Homo sapiens	SINGLE PROTEIN	CHEMBL3797202	1	Scientific Literature	ACS Med Chem Lett	2016	None				4
CHEMBL3797949		None	496.03	0	1.49	14	CNC1CCN(S(=O)(=O)N2[C@@H]3CC[C@H]2C[C@@H](NC(=O)c2cc4c(cc2Cl)NC(=O)C4)C3)CC1	IC50	'='	2	nM	8.7			UO_0000065	17.54	0.36	7.21	7.85	0	CHEMBL3803119	Inhibition of full length N-terminal His-tagged SMYD3 (1 to 428 residues) (unknown origin) expressed in Escherichia coli using N-terminal GST-tagged MEKK2 as substrate preincubated for 30 mins followed by substrate addition by scintillation proximity assay in presence of [3H]SAM	B	BAO_0000019	assay format	Homo sapiens	None	None	None	None				CHEMBL2321643	Histone-lysine N-methyltransferase SMYD3	Homo sapiens	SINGLE PROTEIN	CHEMBL3797202	1	Scientific Literature	ACS Med Chem Lett	2016	None				2
CHEMBL5978434		None	438.55	0	0.94	BDBM432741	O=C(N[C@H]1C[C@H]2CC[C@@H](C1)N2S(=O)(=O)CCN1CCOCC1)c1cc(C2CC2)on1	IC50	'='	1611	nM	5.79		877624	UO_0000065	13.21	0.26	4.85	5.52	0	CHEMBL5734901	SMYD3 Biochemical Assay: The assays were all performed in a buffer consisting of 25 mM Tris-Cl pH 8.0
CHEMBL5799155		None	477.59	0	2	BDBM432755	COCCN(C)c1ccc(S(=O)(=O)N2CC[C@@H](NC(=O)c3cc(C4CC4)on3)C[C@H]2C)cn1	IC50	'>'	10000	nM			877638	UO_0000065					0	CHEMBL5734901	SMYD3 Biochemical Assay: The assays were all performed in a buffer consisting of 25 mM Tris-Cl pH 8.0
CHEMBL5983493		None	518.64	1	1.66	BDBM432758	C[C@H]1C[C@@H](NC(=O)c2cc(C3CC3)on2)CCN1S(=O)(=O)c1ccc(NCCN2CCOCC2)nc1	IC50	'='	132	nM	6.88		877641	UO_0000065	13.26	0.26	5.22	5.3	0	CHEMBL5734901	SMYD3 Biochemical Assay: The assays were all performed in a buffer consisting of 25 mM Tris-Cl pH 8.0
CHEMBL5891463		None	424.91	0	2.57	BDBM432766	C[C@H]1C[C@@H](NC(=O)c2cc(C3CC3)on2)CCN1S(=O)(=O)c1ccc(Cl)cn1	IC50	'='	121	nM	6.92		877649	UO_0000065	16.28	0.34	4.35	6.56	0	CHEMBL5734901	SMYD3 Biochemical Assay: The assays were all performed in a buffer consisting of 25 mM Tris-Cl pH 8.0
CHEMBL5814983		None	379.44	0	1.25	BDBM432728	C[C@@H]1C[C@H](NC(=O)c2cc(C3CC3)on2)CCN1S(=O)(=O)c1c[nH]cn1	IC50	'='	732	nM	6.13		877611	UO_0000065	16.17	0.32	4.89	5.06	0	CHEMBL5734901	SMYD3 Biochemical Assay: The assays were all performed in a buffer consisting of 25 mM Tris-Cl pH 8.0
CHEMBL6011145		None	477.59	0	2	BDBM432801	COCCN(C)c1ccc(S(=O)(=O)N2CC[C@H](NC(=O)c3cc(C4CC4)on3)C[C@H]2C)cn1	IC50	'>'	10000	nM			877684	UO_0000065					0	CHEMBL5734901	SMYD3 Biochemical Assay: The assays were all performed in a buffer consisting of 25 mM Tris-Cl pH 8.0
CHEMBL5761630		None	480.63	0	1.97	BDBM432853	COCCN1CCC(CS(=O)(=O)N2[C@@H]3CC[C@H]2C[C@@H](NC(=O)c2cc(C4CC4)on2)C3)CC1	IC50	'='	3.9	nM	8.41		877736	UO_0000065	17.5	0.35	6.44	8.01	0	CHEMBL5734901	SMYD3 Biochemical Assay: The assays were all performed in a buffer consisting of 25 mM Tris-Cl pH 8.0
CHEMBL6026475		None	518.64	1	1.66	BDBM432804	C[C@H]1C[C@H](NC(=O)c2cc(C3CC3)on2)CCN1S(=O)(=O)c1ccc(NCCN2CCOCC2)nc1	IC50	'='	5540	nM	5.26		877687	UO_0000065	10.14	0.2	3.6	4.05	0	CHEMBL5734901	SMYD3 Biochemical Assay: The assays were all performed in a buffer consisting of 25 mM Tris-Cl pH 8.0
CHEMBL5963478		None	369.47	0	1.52	BDBM378084	CC(NC(=O)c1ccc2nccc(N)c2c1)C1CCN(C(=O)[C@H](C)N)CC1	IC50	'='	15160	nM	4.82		756090	UO_0000065	13.04	0.24	3.3	4.21	0	CHEMBL5733491	SMYD3 Biochemical Assay: The assays were all performed in a buffer consisting of 25 mM Tris-Cl pH 8.0
CHEMBL5934423		None	470	0	0.94	BDBM378475	C[C@@H]1CN(S(=O)(=O)N2CCC(N)CC2)CC[C@H]1NC(=O)c1cc2c(cc1Cl)NC(=O)C2	IC50	'='	21.4	nM	7.67		756481	UO_0000065	16.32	0.34	6.73	6.14	0	CHEMBL5733491	SMYD3 Biochemical Assay: The assays were all performed in a buffer consisting of 25 mM Tris-Cl pH 8.0
CHEMBL5744856		None	349.48	0	1.22	BDBM378221	Cn1nc(C(C)(C)C)cc1C(=O)N[C@H]1CC[C@H](NC(=O)CCN)CC1	IC50	'>'	100000	nM			756227	UO_0000065					0	CHEMBL5733491	SMYD3 Biochemical Assay: The assays were all performed in a buffer consisting of 25 mM Tris-Cl pH 8.0
CHEMBL6065511		None	234.34	0	1.58	BDBM378286	N[C@H]1CC[C@H](NC(=O)C2C[C@@H]3C=C[C@H]2C3)CC1	IC50	'>'	100000	nM			756292	UO_0000065					0	CHEMBL5733491	SMYD3 Biochemical Assay: The assays were all performed in a buffer consisting of 25 mM Tris-Cl pH 8.0
CHEMBL5880433		None	470.6	0	2.35	BDBM378451	C[C@H]1CC(NC(=O)c2ccc3c(c2)CC(=O)N3)CCN1S(=O)(=O)c1ccc(C(C)(C)N)cc1	IC50	'='	1.47	nM	8.83		756457	UO_0000065	18.77	0.37	6.48	7.26	0	CHEMBL5733491	SMYD3 Biochemical Assay: The assays were all performed in a buffer consisting of 25 mM Tris-Cl pH 8.0
CHEMBL3800480		None	481.02	0	1.89	BDBM378463	O=C1Cc2cc(C(=O)N[C@H]3C[C@H]4CC[C@@H](C3)N4S(=O)(=O)CC3CCNCC3)c(Cl)cc2N1	IC50	'='	3.6	nM	8.44		756469	UO_0000065	17.55	0.36	6.55	7.85	0	CHEMBL5733491	SMYD3 Biochemical Assay: The assays were all performed in a buffer consisting of 25 mM Tris-Cl pH 8.0
CHEMBL5925387		None	453.63	0	3.24	BDBM378169	Cc1cccc(Cn2nc(C(C)(C)C)cc2C(=O)NC(C)C2CCN(C(=O)[C@H](C)N)CC2)c1	IC50	'>'	100000	nM			756175	UO_0000065					0	CHEMBL5733491	SMYD3 Biochemical Assay: The assays were all performed in a buffer consisting of 25 mM Tris-Cl pH 8.0
CHEMBL6028078		None	334.42	0	0.79	BDBM378171	COc1cccc(C(=O)NC(C)C2CCN(C(=O)[C@H](C)N)CC2)n1	IC50	'>'	100000	nM			756177	UO_0000065					0	CHEMBL5733491	SMYD3 Biochemical Assay: The assays were all performed in a buffer consisting of 25 mM Tris-Cl pH 8.0
CHEMBL6001423		None	271.36	0	2.48	BDBM378213	Cc1cccc2cc(C(=O)N[C@H]3CC[C@H](N)CC3)[nH]c12	IC50	'='	68490	nM	4.16		756219	UO_0000065	15.35	0.28	1.68	5.87	0	CHEMBL5733491	SMYD3 Biochemical Assay: The assays were all performed in a buffer consisting of 25 mM Tris-Cl pH 8.0
CHEMBL5908954		None	273.34	0	1.64	BDBM378297	N[C@H]1CC[C@H](C(=O)Nc2ccc3c(c2)CC(=O)N3)CC1	IC50	'='	30600	nM	4.51		756303	UO_0000065	16.52	0.31	2.87	5.36	0	CHEMBL5733491	SMYD3 Biochemical Assay: The assays were all performed in a buffer consisting of 25 mM Tris-Cl pH 8.0
CHEMBL6052617		None	309.39	0	0.73	BDBM378298	N[C@H]1CC[C@H](NS(=O)(=O)c2ccc3c(c2)CC(=O)N3)CC1	IC50	'='	14500	nM	4.84		756304	UO_0000065	15.64	0.31	4.11	4.78	0	CHEMBL5733491	SMYD3 Biochemical Assay: The assays were all performed in a buffer consisting of 25 mM Tris-Cl pH 8.0
CHEMBL5892082		None	306.37	0	0.29	BDBM378164	NCCC(=O)N[C@H]1CC[C@H](NC(=O)c2ccc(O)nc2)CC1	IC50	'>'	100000	nM			756170	UO_0000065					0	CHEMBL5733491	SMYD3 Biochemical Assay: The assays were all performed in a buffer consisting of 25 mM Tris-Cl pH 8.0
CHEMBL5821954		None	290.37	0	0.59	BDBM378167	NCCC(=O)NC1CCC(NC(=O)c2ccccn2)CC1	IC50	'='	44240	nM	4.35		756173	UO_0000065	15	0.28	3.76	4.48	0	CHEMBL5733491	SMYD3 Biochemical Assay: The assays were all performed in a buffer consisting of 25 mM Tris-Cl pH 8.0
CHEMBL5985796		None	523.7	1	1.51	BDBM432973	C[C@@H]1C[C@H](NC(=O)c2cc(C3CC3)on2)CCN1S(=O)(=O)CC1CCN(CCN2CCOCC2)CC1	IC50	'='	111	nM	6.96		877856	UO_0000065	13.28	0.26	5.44	6.43	0	CHEMBL5734901	SMYD3 Biochemical Assay: The assays were all performed in a buffer consisting of 25 mM Tris-Cl pH 8.0
CHEMBL5984145		None	349.43	0	2.65	BDBM377912	O=C1Cc2cc(C(=O)NC(c3ccccc3)C3CCNCC3)ccc2N1	IC50	'='	14080	nM	4.85		755924	UO_0000065	13.88	0.25	2.2	6.91	0	CHEMBL5733491	SMYD3 Biochemical Assay: The assays were all performed in a buffer consisting of 25 mM Tris-Cl pH 8.0
CHEMBL5785562		None	451.59	0	1.55	BDBM432903	CN1CCC(N(C)S(=O)(=O)N2[C@@H]3CC[C@H]2C[C@@H](NC(=O)c2cc(C4CC4)on2)C3)CC1	IC50	'='	17.7	nM	7.75		877786	UO_0000065	17.17	0.34	6.2	7.83	0	CHEMBL5734901	SMYD3 Biochemical Assay: The assays were all performed in a buffer consisting of 25 mM Tris-Cl pH 8.0
CHEMBL5813170		None	410.52	0	3.17	BDBM432668	C[C@@H]1C[C@H](NC(=O)c2cc(C3CC3)on2)CCN1C(=O)c1ccc(C(C)(C)N)cc1	IC50	'='	122	nM	6.91		877551	UO_0000065	16.84	0.31	3.74	6.81	0	CHEMBL5734901	SMYD3 Biochemical Assay: The assays were all performed in a buffer consisting of 25 mM Tris-Cl pH 8.0
CHEMBL5980645		None	399.51	0	1.89	BDBM432694	CC(C)OCCS(=O)(=O)N1CC[C@@H](NC(=O)c2cc(C3CC3)on2)C[C@@H]1C	IC50	'>'	10000	nM			877577	UO_0000065					0	CHEMBL5734901	SMYD3 Biochemical Assay: The assays were all performed in a buffer consisting of 25 mM Tris-Cl pH 8.0
CHEMBL5812450		None	344.42	0	0.44	BDBM378372	NCCC(=O)N[C@H]1CC[C@H](NC(=O)c2ccc3c(c2)CNC3=O)CC1	IC50	'>'	100000	nM			756378	UO_0000065					0	CHEMBL5733491	SMYD3 Biochemical Assay: The assays were all performed in a buffer consisting of 25 mM Tris-Cl pH 8.0
CHEMBL6009682		None	432.52	0	1.44	BDBM432768	COC(=O)C1CN(C(=O)[C@H]2CC[C@H](N)CC2)CC(C)C1NC(=O)c1cc(C2CC2)on1	IC50	'='	1225	nM	5.91		877651	UO_0000065	13.67	0.26	4.47	4.63	0	CHEMBL5734901	SMYD3 Biochemical Assay: The assays were all performed in a buffer consisting of 25 mM Tris-Cl pH 8.0
CHEMBL5865386		None	434.56	0	1.4	BDBM432787	O=C(NC1CC2CC3(S(=O)(=O)CC4CCCNC4)CC(C1)N23)c1cc(C2CC2)on1	IC50	'='	45	nM	7.35		877670	UO_0000065	16.91	0.33	5.95	7.03	0	CHEMBL5734901	SMYD3 Biochemical Assay: The assays were all performed in a buffer consisting of 25 mM Tris-Cl pH 8.0
CHEMBL5794421		None	374.49	0	2.18	BDBM432505	C[C@@H]1CC(NC(=O)c2cc(C3CC3)on2)CCN1C(=O)CC1(CN)CCC1	IC50	'='	1991	nM	5.7		877388	UO_0000065	15.22	0.29	3.52	5.62	0	CHEMBL5734901	SMYD3 Biochemical Assay: The assays were all performed in a buffer consisting of 25 mM Tris-Cl pH 8.0
CHEMBL5961651		None	456.52	0	1.72	BDBM378510	CC(=O)Nc1ccc(S(=O)(=O)N2CCC(NC(=O)c3ccc4c(c3)CC(=O)N4)CC2)cc1	IC50	'='	16853	nM	4.77		756516	UO_0000065	10.46	0.2	3.05	3.83	0	CHEMBL5733491	SMYD3 Biochemical Assay: The assays were all performed in a buffer consisting of 25 mM Tris-Cl pH 8.0
CHEMBL5805621		None	423.54	0	0.95	BDBM378511	NC1CCN(S(=O)(=O)N2[C@@H]3CC[C@H]2C[C@@H](NC(=O)c2cc(C4CC4)no2)C3)CC1	IC50	'='	18.5	nM	7.73		756517	UO_0000065	18.26	0.36	6.78	6.35	0	CHEMBL5733491	SMYD3 Biochemical Assay: The assays were all performed in a buffer consisting of 25 mM Tris-Cl pH 8.0
CHEMBL5861401		None	339.42	0	1.61	BDBM321292	C=CS(=O)(=O)N1CCC(NC(=O)c2cc(C3CC3)on2)C[C@@H]1C	IC50	'='	5275	nM	5.28		630419	UO_0000065	15.55	0.31	3.67	5.71	0	CHEMBL5732212	SMYD3 biochemical assay: The assays were all performed in a buffer consisting of 25 mM Tris-Cl pH 8.0
CHEMBL5665422		None	385.51	0	3.86	Compound 10	CCCCCNC(=O)c1ccc2c(c1)NC(=O)CC(C)N2C(=O)C1CCCC1	IC50	'='	27000	nM	4.57			UO_0000065	11.85	0.22	0.71	5.82	0	CHEMBL5665262	Binding affinity to recombinant human SMYD3 expressed in Escherichia coli assessed as catalytic inhibition using DYDNPIFEKFGKGGTYPRRYHVSYHGK-Biotin as substrate by scintillation proximity assay	B	BAO_0000019	assay format	Homo sapiens	None	None	None	None	EFO_ID: MONDO:0004992 | EFO_TERM: cancer			CHEMBL2321643	Histone-lysine N-methyltransferase SMYD3	Homo sapiens	SINGLE PROTEIN	CHEMBL5661986	72	Chemical Probe data from Scientific Literature	SLAS Discov	2021	None		INHIBITOR		2.7
CHEMBL4449691		None	501.65	1	2.82	42	O=C(NC1CCN(S(=O)(=O)C[C@H]2CC[C@H](NCc3cccnc3)CC2)CC1)c1cc(C2CC2)on1	IC50	'='	40	nM	7.4			UO_0000065	14.75	0.29	4.58	6.3	0	CHEMBL4338950	Inhibition of recombinant N-terminal FLAG/His-tagged SMYD3 (unknown origin) expressed in baculovirus infected insect cells using 3H-SAM as substrate assessed as 3H-MEKK2 methylation incubated for 40 mins by scintillation proximity assay	B	BAO_0000219	cell-based format	Homo sapiens	None	None	None	None				CHEMBL2321643	Histone-lysine N-methyltransferase SMYD3	Homo sapiens	SINGLE PROTEIN	CHEMBL4334548	1	Scientific Literature	ACS Med Chem Lett	2020	None				40
CHEMBL4459513		None	413.95	0	4.24	8	CCCCC(=O)N1CCN(C(=O)c2ccc3c(Cl)c4c(nc3c2)CCCC4)CC1	IC50	'='	1520	nM	5.82			UO_0000065	14.06	0.27	1.58	10.87	0	CHEMBL4306860	Inhibition of SMYD3 (unknown origin) using MAP3K2 peptide as substrate pretreated for 30 mins followed by substrate addition and measured after 30 mins by MTase Glo reagent based luminescence assay	B	BAO_0000357	single protein format	Homo sapiens	None	None	None	None				CHEMBL2321643	Histone-lysine N-methyltransferase SMYD3	Homo sapiens	SINGLE PROTEIN	CHEMBL4304770	1	Scientific Literature	ACS Med Chem Lett	2019	None				1.52
CHEMBL5758531		None	337.42	0	3.54	BDBM377982	Cc1cc2[nH]c(C(=O)NC(c3ccccc3)C3CCNCC3)cc2o1	IC50	'='	82750	nM	4.08		755990	UO_0000065	12.1	0.22	0.54	5.83	0	CHEMBL5733491	SMYD3 Biochemical Assay: The assays were all performed in a buffer consisting of 25 mM Tris-Cl pH 8.0
CHEMBL6040357		None	360.41	0	-0.39	BDBM377984	C[C@H](N)C(=O)N1CCC(O)(CNC(=O)c2ccc3c(c2)CC(=O)N3)CC1	IC50	'='	3040	nM	5.52		755992	UO_0000065	15.31	0.29	5.91	4.42	0	CHEMBL5733491	SMYD3 Biochemical Assay: The assays were all performed in a buffer consisting of 25 mM Tris-Cl pH 8.0
CHEMBL5946589		None	289.34	0	1.02	BDBM377987	N[C@H]1CC[C@H](NC(=O)c2cccc3c2OCC(=O)N3)CC1	IC50	'='	61180	nM	4.21		755995	UO_0000065	14.56	0.27	3.19	4.51	0	CHEMBL5733491	SMYD3 Biochemical Assay: The assays were all performed in a buffer consisting of 25 mM Tris-Cl pH 8.0
CHEMBL6065710		None	298.18	0	1.84	BDBM377988	N[C@H]1CC[C@H](NC(=O)c2cncc(Br)c2)CC1	IC50	'='	51000	nM	4.29		755996	UO_0000065	14.4	0.34	2.45	6.31	0	CHEMBL5733491	SMYD3 Biochemical Assay: The assays were all performed in a buffer consisting of 25 mM Tris-Cl pH 8.0
CHEMBL5964227		None	370.45	0	1.64	BDBM377992	CC(NC(=O)c1ccc2ccc(O)nc2c1)C1CCN(C(=O)[C@H](C)N)CC1	IC50	'='	86890	nM	4.06		756000	UO_0000065	10.96	0.21	2.42	3.74	0	CHEMBL5733491	SMYD3 Biochemical Assay: The assays were all performed in a buffer consisting of 25 mM Tris-Cl pH 8.0
CHEMBL5742894		None	260.3	0	0.06	BDBM377938	O=C1Cc2cc(C(=O)NC3CCNCC3)cnc2N1	IC50	'='	86060	nM	4.07		755948	UO_0000065	15.62	0.29	4.01	4.89	0	CHEMBL5733491	SMYD3 Biochemical Assay: The assays were all performed in a buffer consisting of 25 mM Tris-Cl pH 8.0
CHEMBL5928314		None	297.38	0	0.33	BDBM378062	NS(=O)(=O)c1ccc(C(=O)N[C@H]2CC[C@H](N)CC2)cc1	IC50	'>'	100000	nM			756068	UO_0000065					0	CHEMBL5733491	SMYD3 Biochemical Assay: The assays were all performed in a buffer consisting of 25 mM Tris-Cl pH 8.0
CHEMBL5744396		None	321.38	0	-0.11	BDBM378063	CC(NC(=O)c1ccc(O)nn1)C1CCN(C(=O)[C@H](C)N)CC1	IC50	'>'	100000	nM			756069	UO_0000065					0	CHEMBL5733491	SMYD3 Biochemical Assay: The assays were all performed in a buffer consisting of 25 mM Tris-Cl pH 8.0
CHEMBL5866969		None	360.43	0	2.01	BDBM378070	CC(NC(=O)c1cc2cc(F)ccc2[nH]1)C1CCN(C(=O)[C@H](C)N)CC1	IC50	'='	41660	nM	4.38		756076	UO_0000065	12.15	0.23	2.37	4.8	0	CHEMBL5733491	SMYD3 Biochemical Assay: The assays were all performed in a buffer consisting of 25 mM Tris-Cl pH 8.0
CHEMBL5829773		None	328.42	0	1.67	BDBM378105	NCCC(=O)N[C@H]1CC[C@H](NC(=O)c2cc3ccccc3[nH]2)CC1	IC50	'>'	100000	nM			756111	UO_0000065					0	CHEMBL5733491	SMYD3 Biochemical Assay: The assays were all performed in a buffer consisting of 25 mM Tris-Cl pH 8.0
CHEMBL5768410		None	328.42	0	1.67	BDBM378107	NCCC(=O)N[C@H]1CC[C@H](NC(=O)c2ccc3[nH]ccc3c2)CC1	IC50	'='	13440	nM	4.87		756113	UO_0000065	14.83	0.28	3.2	4.87	0	CHEMBL5733491	SMYD3 Biochemical Assay: The assays were all performed in a buffer consisting of 25 mM Tris-Cl pH 8.0
CHEMBL5989523		None	321.42	0	0.56	BDBM378245	NCCC(=O)N[C@H]1CC[C@H](NC(=O)CCCn2ccnc2)CC1	IC50	'>'	100000	nM			756251	UO_0000065					0	CHEMBL5733491	SMYD3 Biochemical Assay: The assays were all performed in a buffer consisting of 25 mM Tris-Cl pH 8.0
CHEMBL6065917		None	428.58	0	0.67	BDBM378474	C[C@H]1C[C@@H](NC(=O)c2nnc(C3CC3)s2)CCN1S(=O)(=O)N1CCC(N)CC1	IC50	'='	18.1	nM	7.74		756480	UO_0000065	18.07	0.38	7.07	6.37	0	CHEMBL5733491	SMYD3 Biochemical Assay: The assays were all performed in a buffer consisting of 25 mM Tris-Cl pH 8.0
CHEMBL5940570		None	485.55	0	2.4	BDBM378497	CN1CCC(CS(=O)(=O)N2[C@@H]3CC[C@H]2C[C@@H](NC(=O)c2ccc4c(c2)OC(F)(F)O4)C3)CC1	IC50	'='	361	nM	6.44		756503	UO_0000065	13.27	0.27	4.04	7.31	0	CHEMBL5733491	SMYD3 Biochemical Assay: The assays were all performed in a buffer consisting of 25 mM Tris-Cl pH 8.0
CHEMBL5855783		None	308.39	0	-0.13	BDBM378403	CCc1nnc(C(=O)N[C@H]2CC[C@H](NC(=O)CCN)CC2)[nH]1	IC50	'>'	50000	nM			756409	UO_0000065					0	CHEMBL5733491	SMYD3 Biochemical Assay: The assays were all performed in a buffer consisting of 25 mM Tris-Cl pH 8.0
CHEMBL6023780		None	310.36	0	-1.2	BDBM378413	CC(NC(=O)c1n[nH]c(=O)[nH]1)C1CCN(C(=O)[C@H](C)N)CC1	IC50	'='	9760	nM	5.01		756419	UO_0000065	16.14	0.31	6.21	3.66	0	CHEMBL5733491	SMYD3 Biochemical Assay: The assays were all performed in a buffer consisting of 25 mM Tris-Cl pH 8.0
CHEMBL5956736		None	253.37	0	1.71	BDBM378421	CCc1cnc(C(=O)N[C@H]2CC[C@H](N)CC2)s1	IC50	'>'	50000	nM			756427	UO_0000065					0	CHEMBL5733491	SMYD3 Biochemical Assay: The assays were all performed in a buffer consisting of 25 mM Tris-Cl pH 8.0
CHEMBL6022516		None	280.33	0	-0.74	BDBM378427	NCCCC(=O)N1CCC(NC(=O)c2nnc[nH]2)CC1	IC50	'>'	10000	nM			756433	UO_0000065					0	CHEMBL5733491	SMYD3 Biochemical Assay: The assays were all performed in a buffer consisting of 25 mM Tris-Cl pH 8.0
CHEMBL5954332		None	343.47	0	2.31	BDBM378438	C[C@H]1C[C@H](NC(=O)c2ccccc2)CCN1C(=O)C1CCC(N)CC1	IC50	'>'	10000	nM			756444	UO_0000065					0	CHEMBL5733491	SMYD3 Biochemical Assay: The assays were all performed in a buffer consisting of 25 mM Tris-Cl pH 8.0
CHEMBL5765517		None	305.38	0	0.29	BDBM378056	Cc1ncc(C(=O)N[C@H]2CC[C@H](NC(=O)CCN)CC2)cn1	IC50	'='	35780	nM	4.45		756062	UO_0000065	14.56	0.28	4.16	4.04	0	CHEMBL5733491	SMYD3 Biochemical Assay: The assays were all performed in a buffer consisting of 25 mM Tris-Cl pH 8.0
CHEMBL5926167		None	379.5	0	3.06	BDBM378061	CC(NC(=O)c1ccc(-c2ccccc2)cc1)C1CCN(C(=O)[C@H](C)N)CC1	IC50	'>'	100000	nM			756067	UO_0000065					0	CHEMBL5733491	SMYD3 Biochemical Assay: The assays were all performed in a buffer consisting of 25 mM Tris-Cl pH 8.0
CHEMBL5926305		None	318.42	0	1.09	BDBM378125	Cc1cnccc1C(=O)NC(C)C1CCN(C(=O)[C@H](C)N)CC1	IC50	'>'	100000	nM			756131	UO_0000065					0	CHEMBL5733491	SMYD3 Biochemical Assay: The assays were all performed in a buffer consisting of 25 mM Tris-Cl pH 8.0
CHEMBL6052553		None	318.42	0	1.09	BDBM378126	Cc1ccncc1C(=O)NC(C)C1CCN(C(=O)[C@H](C)N)CC1	IC50	'='	73380	nM	4.13		756132	UO_0000065	12.98	0.25	3.04	4.68	0	CHEMBL5733491	SMYD3 Biochemical Assay: The assays were all performed in a buffer consisting of 25 mM Tris-Cl pH 8.0
CHEMBL5746983		None	318.42	0	1.09	BDBM378128	Cc1ccc(C(=O)NC(C)C2CCN(C(=O)[C@H](C)N)CC2)cn1	IC50	'>'	100000	nM			756134	UO_0000065					0	CHEMBL5733491	SMYD3 Biochemical Assay: The assays were all performed in a buffer consisting of 25 mM Tris-Cl pH 8.0
CHEMBL5632319		None	354.46	0	1.04	22	NC1CCN(c2ncnc3cc(C(=O)NC4CCNCC4)ccc23)CC1	IC50	'>'	200000	nM		Outside typical range		UO_0000065					0	CHEMBL5628408	Displacement of 3H-SAM from SMYD3 (unknown origin) using biotinylated-MAP3K2 as substrate incubated for 45 mins by SPA assay	B	BAO_0000357	single protein format	Homo sapiens	None	None	None	None				CHEMBL2321643	Histone-lysine N-methyltransferase SMYD3	Homo sapiens	SINGLE PROTEIN	CHEMBL5625232	1	Scientific Literature	Eur J Med Chem	2023	None	TIME = 0.75 hr			200
CHEMBL5631287		None	383.5	0	0.19	23	NC1CCN(c2ncnc3cc(C(=O)NCCN4CCNCC4)ccc23)CC1	IC50	'>'	200000	nM		Outside typical range		UO_0000065					0	CHEMBL5628408	Displacement of 3H-SAM from SMYD3 (unknown origin) using biotinylated-MAP3K2 as substrate incubated for 45 mins by SPA assay	B	BAO_0000357	single protein format	Homo sapiens	None	None	None	None				CHEMBL2321643	Histone-lysine N-methyltransferase SMYD3	Homo sapiens	SINGLE PROTEIN	CHEMBL5625232	1	Scientific Literature	Eur J Med Chem	2023	None	TIME = 0.75 hr			200
CHEMBL3798468		None	572.13	1	3.06	Chemical probe: EPZ030456	O=C1Cc2cc(C(=O)N[C@H]3C[C@H]4CC[C@@H](C3)N4S(=O)(=O)N3CCC(NCc4ccccc4)CC3)c(Cl)cc2N1	IC50	'='	4	nM	8.4			UO_0000065	14.68	0.29	5.34	7.58	1	CHEMBL5676603	Inhibition of SMYD3 (unknown origin)	B	BAO_0000357	single protein format	Homo sapiens	None	None	None	None	EFO_ID: MONDO:0004992 | EFO_TERM: cancer			CHEMBL2321643	Histone-lysine N-methyltransferase SMYD3	Homo sapiens	SINGLE PROTEIN	CHEMBL5674880	72	Chemical Probe data from Scientific Literature	PLoS One	2018	None		INHIBITOR		4
CHEMBL3800480		None	481.02	0	1.89	6	O=C1Cc2cc(C(=O)N[C@H]3C[C@H]4CC[C@@H](C3)N4S(=O)(=O)CC3CCNCC3)c(Cl)cc2N1	IC50	'='	3200	nM	5.5			UO_0000065	11.42	0.23	3.6	5.11	0	CHEMBL3803120	Inhibition of human SMYD3 expressed in HEK293T/17 cells using FLAG-tagged MEKK2 as substrate incubated for 30 mins in low air flow area followed by incubation for 24 hrs at 37 degC by Western blot analysis	B	BAO_0000219	cell-based format	Homo sapiens	None	None	HEK-293T	None				CHEMBL2321643	Histone-lysine N-methyltransferase SMYD3	Homo sapiens	SINGLE PROTEIN	CHEMBL3797202	1	Scientific Literature	ACS Med Chem Lett	2016	CHEMBL3706569				3200
CHEMBL5760330		None	347.42	0	0.55	BDBM378332	CC(=O)Nc1ccc(C(=O)N[C@H]2CC[C@H](NC(=O)CCN)CC2)nc1	IC50	'>'	100000	nM			756338	UO_0000065					0	CHEMBL5733491	SMYD3 Biochemical Assay: The assays were all performed in a buffer consisting of 25 mM Tris-Cl pH 8.0
CHEMBL5936545		None	368.46	0	-0.05	BDBM378337	CC(C)(CNC(=O)CCN)CNS(=O)(=O)c1ccc2c(c1)CC(=O)N2	IC50	'='	18320	nM	4.74		756343	UO_0000065	12.86	0.26	4.79	3.63	0	CHEMBL5733491	SMYD3 Biochemical Assay: The assays were all performed in a buffer consisting of 25 mM Tris-Cl pH 8.0
CHEMBL3798745		None	481.02	0	1.89	11	O=C1Cc2cc(C(=O)N[C@H]3C[C@H]4CC[C@@H](C3)N4S(=O)(=O)C[C@H]3CCCNC3)c(Cl)cc2N1	IC50	'='	1300	nM	5.89			UO_0000065	12.24	0.25	4	5.47	0	CHEMBL3803120	Inhibition of human SMYD3 expressed in HEK293T/17 cells using FLAG-tagged MEKK2 as substrate incubated for 30 mins in low air flow area followed by incubation for 24 hrs at 37 degC by Western blot analysis	B	BAO_0000219	cell-based format	Homo sapiens	None	None	HEK-293T	None				CHEMBL2321643	Histone-lysine N-methyltransferase SMYD3	Homo sapiens	SINGLE PROTEIN	CHEMBL3797202	1	Scientific Literature	ACS Med Chem Lett	2016	CHEMBL3706569				1300
CHEMBL3798488		None	420.54	0	0.7	4	O=C1Cc2cc(C(=O)NC3CCN(S(=O)(=O)CC4CCNCC4)CC3)ccc2N1	IC50	'>'	10000	nM				UO_0000065					0	CHEMBL3803120	Inhibition of human SMYD3 expressed in HEK293T/17 cells using FLAG-tagged MEKK2 as substrate incubated for 30 mins in low air flow area followed by incubation for 24 hrs at 37 degC by Western blot analysis	B	BAO_0000219	cell-based format	Homo sapiens	None	None	HEK-293T	None				CHEMBL2321643	Histone-lysine N-methyltransferase SMYD3	Homo sapiens	SINGLE PROTEIN	CHEMBL3797202	1	Scientific Literature	ACS Med Chem Lett	2016	CHEMBL3706569				10000
CHEMBL3797749		None	482.01	0	1.23	13	NC1CCN(S(=O)(=O)N2[C@@H]3CC[C@H]2C[C@@H](NC(=O)c2cc4c(cc2Cl)NC(=O)C4)C3)CC1	IC50	'='	1	nM	9			UO_0000065	18.67	0.38	7.77	7.21	0	CHEMBL3803119	Inhibition of full length N-terminal His-tagged SMYD3 (1 to 428 residues) (unknown origin) expressed in Escherichia coli using N-terminal GST-tagged MEKK2 as substrate preincubated for 30 mins followed by substrate addition by scintillation proximity assay in presence of [3H]SAM	B	BAO_0000019	assay format	Homo sapiens	None	None	None	None				CHEMBL2321643	Histone-lysine N-methyltransferase SMYD3	Homo sapiens	SINGLE PROTEIN	CHEMBL3797202	1	Scientific Literature	ACS Med Chem Lett	2016	None				1
CHEMBL3797708		None	460.6	0	1.58	7	CN1CCC(CS(=O)(=O)N2[C@@H]3CC[C@H]2C[C@@H](NC(=O)c2ccc4c(c2)CC(=O)N4)C3)CC1	IC50	'='	1	nM	9			UO_0000065	19.54	0.38	7.42	9.11	0	CHEMBL3803119	Inhibition of full length N-terminal His-tagged SMYD3 (1 to 428 residues) (unknown origin) expressed in Escherichia coli using N-terminal GST-tagged MEKK2 as substrate preincubated for 30 mins followed by substrate addition by scintillation proximity assay in presence of [3H]SAM	B	BAO_0000019	assay format	Homo sapiens	None	None	None	None				CHEMBL2321643	Histone-lysine N-methyltransferase SMYD3	Homo sapiens	SINGLE PROTEIN	CHEMBL3797202	1	Scientific Literature	ACS Med Chem Lett	2016	None				1
CHEMBL3799643		None	510.06	1	1.83	BDBM378461	CN(C)C1CCN(S(=O)(=O)N2[C@@H]3CC[C@H]2C[C@@H](NC(=O)c2cc4c(cc2Cl)NC(=O)C4)C3)CC1	IC50	'='	3.46	nM	8.46		756467	UO_0000065	16.59	0.34	6.63	8.29	0	CHEMBL5733491	SMYD3 Biochemical Assay: The assays were all performed in a buffer consisting of 25 mM Tris-Cl pH 8.0
CHEMBL4535915		None	382.49	0	0.83	7	O=C(NC1CCN(S(=O)(=O)C2CCNCC2)CC1)c1cc(C2CC2)on1	IC50	'='	32	nM	7.5			UO_0000065	19.59	0.39	6.66	7.17	0	CHEMBL4338950	Inhibition of recombinant N-terminal FLAG/His-tagged SMYD3 (unknown origin) expressed in baculovirus infected insect cells using 3H-SAM as substrate assessed as 3H-MEKK2 methylation incubated for 40 mins by scintillation proximity assay	B	BAO_0000219	cell-based format	Homo sapiens	None	None	None	None				CHEMBL2321643	Histone-lysine N-methyltransferase SMYD3	Homo sapiens	SINGLE PROTEIN	CHEMBL4334548	1	Scientific Literature	ACS Med Chem Lett	2020	None				32
CHEMBL4558640		None	396.51	0	1.17	8	CN1CCC(S(=O)(=O)N2CCC(NC(=O)c3cc(C4CC4)on3)CC2)CC1	IC50	'='	50	nM	7.3			UO_0000065	18.41	0.37	6.13	7.63	0	CHEMBL4338950	Inhibition of recombinant N-terminal FLAG/His-tagged SMYD3 (unknown origin) expressed in baculovirus infected insect cells using 3H-SAM as substrate assessed as 3H-MEKK2 methylation incubated for 40 mins by scintillation proximity assay	B	BAO_0000219	cell-based format	Homo sapiens	None	None	None	None				CHEMBL2321643	Histone-lysine N-methyltransferase SMYD3	Homo sapiens	SINGLE PROTEIN	CHEMBL4334548	1	Scientific Literature	ACS Med Chem Lett	2020	None				50
CHEMBL4573978		None	396.51	0	1.35	10	N[C@H]1CC[C@H](S(=O)(=O)N2CCC(NC(=O)c3cc(C4CC4)on3)CC2)CC1	IC50	'='	1.6	nM	8.8			UO_0000065	22.18	0.44	7.45	7.42	0	CHEMBL4338950	Inhibition of recombinant N-terminal FLAG/His-tagged SMYD3 (unknown origin) expressed in baculovirus infected insect cells using 3H-SAM as substrate assessed as 3H-MEKK2 methylation incubated for 40 mins by scintillation proximity assay	B	BAO_0000219	cell-based format	Homo sapiens	None	None	None	None				CHEMBL2321643	Histone-lysine N-methyltransferase SMYD3	Homo sapiens	SINGLE PROTEIN	CHEMBL4334548	1	Scientific Literature	ACS Med Chem Lett	2020	None				1.6
CHEMBL4527316		None	501.65	1	2.82	41	O=C(NC1CCN(S(=O)(=O)C[C@H]2CC[C@H](NCc3ccncc3)CC2)CC1)c1cc(C2CC2)on1	IC50	'='	158	nM	6.8			UO_0000065	13.56	0.27	3.98	5.79	0	CHEMBL4338950	Inhibition of recombinant N-terminal FLAG/His-tagged SMYD3 (unknown origin) expressed in baculovirus infected insect cells using 3H-SAM as substrate assessed as 3H-MEKK2 methylation incubated for 40 mins by scintillation proximity assay	B	BAO_0000219	cell-based format	Homo sapiens	None	None	None	None				CHEMBL2321643	Histone-lysine N-methyltransferase SMYD3	Homo sapiens	SINGLE PROTEIN	CHEMBL4334548	1	Scientific Literature	ACS Med Chem Lett	2020	None				158
CHEMBL6064723		None	398.51	0	1.81	BDBM378509	C[C@H]1C[C@@H](NC(=O)c2ccc3c(c2)CC(=O)N3)CCN1C(=O)[C@H]1CC[C@H](N)CC1	IC50	'='	6811	nM	5.17		756515	UO_0000065	12.97	0.24	3.36	4.94	0	CHEMBL5733491	SMYD3 Biochemical Assay: The assays were all performed in a buffer consisting of 25 mM Tris-Cl pH 8.0
CHEMBL5768972		None	309.37	0	-0.86	BDBM378350	NCCC(=O)N[C@H]1CC[C@H](NC(=O)C2=NNC(=O)CC2)CC1	IC50	'='	15100	nM	4.82		756356	UO_0000065	15.58	0.3	5.68	3.84	0	CHEMBL5733491	SMYD3 Biochemical Assay: The assays were all performed in a buffer consisting of 25 mM Tris-Cl pH 8.0
CHEMBL5925679		None	372.43	0	0.53	BDBM378357	CC(NC(=O)c1ccc2c(c1)C(=O)C(=O)N2)C1CCN(C(=O)[C@H](C)N)CC1	IC50	'='	14080	nM	4.85		756363	UO_0000065	13.03	0.25	4.32	3.99	0	CHEMBL5733491	SMYD3 Biochemical Assay: The assays were all performed in a buffer consisting of 25 mM Tris-Cl pH 8.0
CHEMBL5911286		None	378.47	0	2.14	BDBM378367	CC(NC(=O)c1nc2ccc(F)cc2s1)C1CCN(C(=O)[C@H](C)N)CC1	IC50	'='	51000	nM	4.29		756373	UO_0000065	11.34	0.23	2.15	4.86	0	CHEMBL5733491	SMYD3 Biochemical Assay: The assays were all performed in a buffer consisting of 25 mM Tris-Cl pH 8.0
CHEMBL5942321		None	294.36	0	-0.3	BDBM378407	NCCCC(=O)N[C@H]1CC[C@H](NC(=O)c2nnc[nH]2)CC1	IC50	'>'	50000	nM			756413	UO_0000065					0	CHEMBL5733491	SMYD3 Biochemical Assay: The assays were all performed in a buffer consisting of 25 mM Tris-Cl pH 8.0
CHEMBL5998637		None	448.55	0	1.18	BDBM378468	O=C(N[C@H]1C[C@H]2CC[C@@H](C1)N2S(=O)(=O)CC1CCNCC1)c1ccc2[nH]c(=O)oc2c1	IC50	'='	5.21	nM	8.28		756474	UO_0000065	18.47	0.36	7.1	6.65	0	CHEMBL5733491	SMYD3 Biochemical Assay: The assays were all performed in a buffer consisting of 25 mM Tris-Cl pH 8.0
CHEMBL6065476		None	242.71	0	1.06	BDBM378412	N[C@H]1CC[C@H](NC(=O)c2cc(Cl)[nH]n2)CC1	IC50	'>'	50000	nM			756418	UO_0000065					0	CHEMBL5733491	SMYD3 Biochemical Assay: The assays were all performed in a buffer consisting of 25 mM Tris-Cl pH 8.0
CHEMBL5922677		None	223.28	0	0.11	BDBM378417	Cc1nc(C(=O)N[C@H]2CC[C@H](N)CC2)n[nH]1	IC50	'='	14710	nM	4.83		756423	UO_0000065	21.64	0.41	4.72	5	0	CHEMBL5733491	SMYD3 Biochemical Assay: The assays were all performed in a buffer consisting of 25 mM Tris-Cl pH 8.0
CHEMBL5870588		None	424.55	0	2.92	BDBM293375	C[C@@H](N)CC(=O)N[C@H]1CC[C@H](NC(=O)c2cc(C3CC3)on2)[C@H](Cc2ccccc2)C1	IC50	'='	28.6	nM	7.54		559192	UO_0000065	17.77	0.33	4.62	6.84	0	CHEMBL5731515	SMYD3 Biochemical Assay: S-adenosylmethionine (SAM)
CHEMBL5925653		None	417.53	0	2.71	BDBM432644	C[C@@H]1C[C@@H](NC(=O)c2cc(C3CC3)on2)CCN1S(=O)(=O)CCc1ccccc1	IC50	'>'	10000	nM			877527	UO_0000065					0	CHEMBL5734901	SMYD3 Biochemical Assay: The assays were all performed in a buffer consisting of 25 mM Tris-Cl pH 8.0
CHEMBL5948819		None	388.51	0	2.43	BDBM432673	C[C@H]1C[C@@H](NC(=O)c2cc(C3CC3)on2)CCN1C(=O)C1CCCC(CN)C1	IC50	'='	2467	nM	5.61		877556	UO_0000065	14.43	0.27	3.18	5.53	0	CHEMBL5734901	SMYD3 Biochemical Assay: The assays were all performed in a buffer consisting of 25 mM Tris-Cl pH 8.0
CHEMBL5829318		None	370.48	0	0.67	BDBM432685	C[C@H]1CN(S(=O)(=O)CCCN)CC[C@@H]1NC(=O)c1cc(C2CC2)on1	IC50	'='	88.2	nM	7.05		877568	UO_0000065	19.04	0.39	6.38	5.95	0	CHEMBL5734901	SMYD3 Biochemical Assay: The assays were all performed in a buffer consisting of 25 mM Tris-Cl pH 8.0
CHEMBL5845044		None	464.59	0	1.12	BDBM432710	O=C(NC1CC2CC3(S(=O)(=O)CCCN4CCOCC4)CC(C1)N23)c1cc(C2CC2)on1	IC50	'='	6322	nM	5.2		877593	UO_0000065	11.19	0.22	4.08	4.95	0	CHEMBL5734901	SMYD3 Biochemical Assay: The assays were all performed in a buffer consisting of 25 mM Tris-Cl pH 8.0
CHEMBL5984708		None	472.57	0	1.23	BDBM432776	NCCNc1ncccc1S(=O)(=O)C12CC3CC(NC(=O)c4cc(C5CC5)on4)CC(C1)N32	IC50	'='	1309	nM	5.88		877659	UO_0000065	12.45	0.24	4.65	4.1	0	CHEMBL5734901	SMYD3 Biochemical Assay: The assays were all performed in a buffer consisting of 25 mM Tris-Cl pH 8.0
CHEMBL5858309		None	432.5	0	1.62	BDBM432777	C[C@H]1C[C@@H](NC(=O)c2cc(C3CC3)on2)CCN1S(=O)(=O)c1cccc(C(N)=O)c1	IC50	'='	932	nM	6.03		877660	UO_0000065	13.94	0.27	4.41	4.45	0	CHEMBL5734901	SMYD3 Biochemical Assay: The assays were all performed in a buffer consisting of 25 mM Tris-Cl pH 8.0
CHEMBL5874210		None	439.58	0	1.41	BDBM432971	C[C@H]1C[C@@H](NC(=O)c2cc(C3CC3)on2)CCN1S(=O)(=O)N(C)C1CCN(C)CC1	IC50	'='	108	nM	6.97		877854	UO_0000065	15.85	0.32	5.56	7.04	0	CHEMBL5734901	SMYD3 Biochemical Assay: The assays were all performed in a buffer consisting of 25 mM Tris-Cl pH 8.0
CHEMBL6005192		None	398.53	0	1.45	BDBM432799	CC(C)[C@@H]1C[C@H](NC(=O)c2cc(C3CC3)on2)CCN1S(=O)(=O)CCCN	IC50	'='	766	nM	6.12		877682	UO_0000065	15.35	0.31	4.67	5.16	0	CHEMBL5734901	SMYD3 Biochemical Assay: The assays were all performed in a buffer consisting of 25 mM Tris-Cl pH 8.0
CHEMBL5827944		None	409.51	0	0.43	BDBM432824	O=C(N[C@H]1C[C@H]2CC[C@@H](C1)N2S(=O)(=O)N1CCNCC1)c1cc(C2CC2)on1	IC50	'='	3	nM	8.52		877707	UO_0000065	20.81	0.42	8.09	7.91	0	CHEMBL5734901	SMYD3 Biochemical Assay: The assays were all performed in a buffer consisting of 25 mM Tris-Cl pH 8.0
CHEMBL5976948		None	424.57	0	1.81	BDBM432830	C[C@H]1C[C@@H](NC(=O)c2cc(C3CC3)on2)CCN1S(=O)(=O)CC1CCN(C)CC1	IC50	'='	1	nM	9		877713	UO_0000065	21.2	0.42	7.19	9.4	0	CHEMBL5734901	SMYD3 Biochemical Assay: The assays were all performed in a buffer consisting of 25 mM Tris-Cl pH 8.0
CHEMBL5894057		None	454.59	0	1.17	BDBM432835	C[C@H]1C[C@@H](NC(=O)c2cc(C3CC3)on2)CCN1S(=O)(=O)CC1CCN(CCO)CC1	IC50	'='	1.3	nM	8.89		877718	UO_0000065	19.55	0.39	7.72	7.66	0	CHEMBL5734901	SMYD3 Biochemical Assay: The assays were all performed in a buffer consisting of 25 mM Tris-Cl pH 8.0
CHEMBL5779357		None	384.5	0	1.2	BDBM432845	C[C@H]1C[C@@H](NC(=O)c2cc(C3CC3)on2)CCN1S(=O)(=O)CCCCN	IC50	'='	2.4	nM	8.62		877728	UO_0000065	22.42	0.45	7.42	7.27	0	CHEMBL5734901	SMYD3 Biochemical Assay: The assays were all performed in a buffer consisting of 25 mM Tris-Cl pH 8.0
CHEMBL6042411		None	425.56	0	0.55	BDBM432861	NCCNCCCS(=O)(=O)N1[C@@H]2CC[C@H]1C[C@@H](NC(=O)c1cc(C3CC3)on1)C2	IC50	'='	5.3	nM	8.28		877744	UO_0000065	19.45	0.39	7.73	6.34	0	CHEMBL5734901	SMYD3 Biochemical Assay: The assays were all performed in a buffer consisting of 25 mM Tris-Cl pH 8.0
CHEMBL5894409		None	411.53	0	0.66	BDBM432864	C[C@H]1CN(S(=O)(=O)N2CCC(N)CC2)CC[C@H]1NC(=O)c1cc(C2CC2)on1	IC50	'='	6.1	nM	8.21		877747	UO_0000065	19.96	0.4	7.55	6.75	0	CHEMBL5734901	SMYD3 Biochemical Assay: The assays were all performed in a buffer consisting of 25 mM Tris-Cl pH 8.0
CHEMBL5954587		None	422.55	0	1.61	BDBM432866	O=C(N[C@H]1C[C@H]2CC[C@@H](C1)N2S(=O)(=O)C[C@@H]1CCCNC1)c1cc(C2CC2)on1	IC50	'='	6.6	nM	8.18		877749	UO_0000065	19.36	0.39	6.57	7.83	0	CHEMBL5734901	SMYD3 Biochemical Assay: The assays were all performed in a buffer consisting of 25 mM Tris-Cl pH 8.0
CHEMBL6014348		None	435.55	0	0.86	BDBM432891	O=C(N[C@H]1C[C@H]2CC[C@@H](C1)N2S(=O)(=O)NC1CC2(CNC2)C1)c1cc(C2CC2)on1	IC50	'='	12	nM	7.92		877774	UO_0000065	18.19	0.36	7.06	6.79	0	CHEMBL5734901	SMYD3 Biochemical Assay: The assays were all performed in a buffer consisting of 25 mM Tris-Cl pH 8.0
CHEMBL6052505		None	411.53	0	0.53	BDBM432892	C[C@@H]1CN(S(=O)(=O)N2CCNCC2)[C@H](C)C[C@@H]1NC(=O)c1cc(C2CC2)on1	IC50	'='	12.6	nM	7.9		877775	UO_0000065	19.2	0.39	7.37	7.33	0	CHEMBL5734901	SMYD3 Biochemical Assay: The assays were all performed in a buffer consisting of 25 mM Tris-Cl pH 8.0
CHEMBL6038985		None	425.56	0	0.92	BDBM432964	C[C@H]1CN(S(=O)(=O)NC2CCN(C)CC2)CC[C@H]1NC(=O)c1cc(C2CC2)on1	IC50	'='	96.9	nM	7.01		877847	UO_0000065	16.48	0.33	6.09	6.51	0	CHEMBL5734901	SMYD3 Biochemical Assay: The assays were all performed in a buffer consisting of 25 mM Tris-Cl pH 8.0
CHEMBL6056091		None	439.58	0	1.26	BDBM432965	C[C@H]1CN(S(=O)(=O)N(C)C2CCN(C)CC2)CC[C@H]1NC(=O)c1cc(C2CC2)on1	IC50	'='	101	nM	7		877848	UO_0000065	15.91	0.32	5.74	7.07	0	CHEMBL5734901	SMYD3 Biochemical Assay: The assays were all performed in a buffer consisting of 25 mM Tris-Cl pH 8.0
CHEMBL6062842		None	470.55	0	2.11	BDBM378499	CC(=O)Nc1ccc(S(=O)(=O)N2CC[C@H](NC(=O)c3ccc4c(c3)CC(=O)N4)C[C@@H]2C)cc1	IC50	'='	526	nM	6.28		756505	UO_0000065	13.34	0.26	4.17	5.04	0	CHEMBL5733491	SMYD3 Biochemical Assay: The assays were all performed in a buffer consisting of 25 mM Tris-Cl pH 8.0
CHEMBL3798404		None	461.59	0	0.88	BDBM378473	Cc1cc2c(cc1C(=O)N[C@H]1C[C@H]3CC[C@@H](C1)N3S(=O)(=O)N1CCC(N)CC1)CC(=O)N2	IC50	'='	15.6	nM	7.81		756479	UO_0000065	16.91	0.33	6.93	6.25	1	CHEMBL5733491	SMYD3 Biochemical Assay: The assays were all performed in a buffer consisting of 25 mM Tris-Cl pH 8.0
CHEMBL6052033		None	476.6	0	1.46	BDBM378492	C[C@H]1Oc2ccc(C(=O)N[C@H]3C[C@H]4CC[C@@H](C3)N4S(=O)(=O)CC3CCNCC3)cc2NC1=O	IC50	'='	185	nM	6.73		756498	UO_0000065	14.13	0.28	5.27	5.76	0	CHEMBL5733491	SMYD3 Biochemical Assay: The assays were all performed in a buffer consisting of 25 mM Tris-Cl pH 8.0
CHEMBL5988184		None	304.39	0	0.9	BDBM378248	Cc1cnccc1C(=O)N[C@H]1CC[C@H](NC(=O)CCN)CC1	IC50	'>'	100000	nM			756254	UO_0000065					0	CHEMBL5733491	SMYD3 Biochemical Assay: The assays were all performed in a buffer consisting of 25 mM Tris-Cl pH 8.0
CHEMBL5784618		None	328.42	0	1.67	BDBM378260	NCCC(=O)N[C@H]1CC[C@H](NC(=O)c2c[nH]c3ccccc23)CC1	IC50	'>'	100000	nM			756266	UO_0000065					0	CHEMBL5733491	SMYD3 Biochemical Assay: The assays were all performed in a buffer consisting of 25 mM Tris-Cl pH 8.0
CHEMBL5745006		None	360.48	0	2	BDBM378264	CC(NC(=O)c1nc2ccccc2s1)C1CCN(C(=O)[C@H](C)N)CC1	IC50	'>'	100000	nM			756270	UO_0000065					0	CHEMBL5733491	SMYD3 Biochemical Assay: The assays were all performed in a buffer consisting of 25 mM Tris-Cl pH 8.0
CHEMBL5867055		None	307.4	0	0.12	BDBM378282	CC(NC(=O)c1ccnn1C)C1CCN(C(=O)[C@H](C)N)CC1	IC50	'>'	100000	nM			756288	UO_0000065					0	CHEMBL5733491	SMYD3 Biochemical Assay: The assays were all performed in a buffer consisting of 25 mM Tris-Cl pH 8.0
CHEMBL6030408		None	320.39	0	0.49	BDBM378180	CC(NC(=O)c1ccc(O)cn1)C1CCN(C(=O)[C@H](C)N)CC1	IC50	'>'	100000	nM			756186	UO_0000065					0	CHEMBL5733491	SMYD3 Biochemical Assay: The assays were all performed in a buffer consisting of 25 mM Tris-Cl pH 8.0
CHEMBL6050369		None	305.38	0	-0.09	BDBM378234	NCCC(=O)N[C@H]1CC[C@H](NC(=O)Cc2cncnc2)CC1	IC50	'>'	100000	nM			756240	UO_0000065					0	CHEMBL5733491	SMYD3 Biochemical Assay: The assays were all performed in a buffer consisting of 25 mM Tris-Cl pH 8.0
CHEMBL5759889		None	270.34	0	1.63	BDBM378274	N[C@H]1CC[C@H](NC(=O)c2cnc3ccccc3n2)CC1	IC50	'>'	100000	nM			756280	UO_0000065					0	CHEMBL5733491	SMYD3 Biochemical Assay: The assays were all performed in a buffer consisting of 25 mM Tris-Cl pH 8.0
CHEMBL5959515		None	343.43	0	1	BDBM378276	NCCC(=O)N[C@H]1CC[C@H](NC(=O)Cc2c[nH]c3cccnc23)CC1	IC50	'>'	100000	nM			756282	UO_0000065					0	CHEMBL5733491	SMYD3 Biochemical Assay: The assays were all performed in a buffer consisting of 25 mM Tris-Cl pH 8.0
CHEMBL5909379		None	250.35	0	1.05	BDBM378203	N[C@H]1CC[C@H](NC(=O)CCCn2ccnc2)CC1	IC50	'>'	100000	nM			756209	UO_0000065					0	CHEMBL5733491	SMYD3 Biochemical Assay: The assays were all performed in a buffer consisting of 25 mM Tris-Cl pH 8.0
CHEMBL5778784		None	222.29	0	0.42	BDBM378207	Cn1ccnc1C(=O)N[C@H]1CC[C@H](N)CC1	IC50	'>'	100000	nM			756213	UO_0000065					0	CHEMBL5733491	SMYD3 Biochemical Assay: The assays were all performed in a buffer consisting of 25 mM Tris-Cl pH 8.0
CHEMBL6037950		None	238.29	0	0.13	BDBM377937	Cn1nc(O)cc1C(=O)N[C@H]1CC[C@H](N)CC1	IC50	'='	129100	nM		Outside typical range	755947	UO_0000065					0	CHEMBL5733491	SMYD3 Biochemical Assay: The assays were all performed in a buffer consisting of 25 mM Tris-Cl pH 8.0
CHEMBL5853837		None	330.39	0	0.11	BDBM378005	C[C@H](N)C(=O)N1CC[C@H](CNC(=O)c2ccc3c(c2)CC(=O)N3)C1	IC50	'='	13620	nM	4.87		756013	UO_0000065	14.73	0.28	4.76	4.65	0	CHEMBL5733491	SMYD3 Biochemical Assay: The assays were all performed in a buffer consisting of 25 mM Tris-Cl pH 8.0
CHEMBL5991671		None	291.36	0	-0.02	BDBM378017	NCCC(=O)N[C@H]1CC[C@H](NC(=O)c2ncccn2)CC1	IC50	'>'	100000	nM			756023	UO_0000065					0	CHEMBL5733491	SMYD3 Biochemical Assay: The assays were all performed in a buffer consisting of 25 mM Tris-Cl pH 8.0
CHEMBL5911441		None	274.32	0	0.53	BDBM377908	O=C1CNc2cc(C(=O)NC3CCNCC3)ccc2N1	IC50	'='	23860	nM	4.62		755920	UO_0000065	16.85	0.32	4.09	5.62	0	CHEMBL5733491	SMYD3 Biochemical Assay: The assays were all performed in a buffer consisting of 25 mM Tris-Cl pH 8.0
CHEMBL5968421		None	344.42	0	1.14	BDBM378336	NCCC(=O)N[C@H]1CC[C@H](C(=O)Nc2ccc3c(c2)CC(=O)N3)CC1	IC50	'='	4460	nM	5.35		756342	UO_0000065	15.54	0.29	4.21	4.72	0	CHEMBL5733491	SMYD3 Biochemical Assay: The assays were all performed in a buffer consisting of 25 mM Tris-Cl pH 8.0
CHEMBL6021396		None	358.44	0	0.63	BDBM378338	CC(NC(=O)c1ccc2c(c1)CNC2=O)C1CCN(C(=O)[C@H](C)N)CC1	IC50	'>'	100000	nM			756344	UO_0000065					0	CHEMBL5733491	SMYD3 Biochemical Assay: The assays were all performed in a buffer consisting of 25 mM Tris-Cl pH 8.0
CHEMBL5998013		None	370.46	0	0.97	BDBM378341	CC(NC(=O)c1ccc(-n2cncn2)cc1)C1CCN(C(=O)[C@H](C)N)CC1	IC50	'>'	100000	nM			756347	UO_0000065					0	CHEMBL5733491	SMYD3 Biochemical Assay: The assays were all performed in a buffer consisting of 25 mM Tris-Cl pH 8.0
CHEMBL6063520		None	305.38	0	0.32	BDBM378351	NCCC(=O)N[C@H]1CC[C@H](NC(=O)/C=C/c2c[nH]cn2)CC1	IC50	'='	71060	nM	4.15		756357	UO_0000065	13.58	0.26	3.83	3.67	0	CHEMBL5733491	SMYD3 Biochemical Assay: The assays were all performed in a buffer consisting of 25 mM Tris-Cl pH 8.0
CHEMBL5882607		None	271.36	0	2.1	BDBM378040	N[C@H]1CC[C@H](NC(=O)Cc2c[nH]c3ccccc23)CC1	IC50	'>'	100000	nM			756046	UO_0000065					0	CHEMBL5733491	SMYD3 Biochemical Assay: The assays were all performed in a buffer consisting of 25 mM Tris-Cl pH 8.0
CHEMBL5857360		None	250.35	0	1.21	BDBM377896	CCn1nc(C)cc1C(=O)N[C@H]1CC[C@H](N)CC1	IC50	'='	101580	nM		Outside typical range	755908	UO_0000065					0	CHEMBL5733491	SMYD3 Biochemical Assay: The assays were all performed in a buffer consisting of 25 mM Tris-Cl pH 8.0
CHEMBL5771341		None	339.42	0	1.66	BDBM321294	C=CS(=O)(=O)N[C@H]1CC[C@@H](NC(=O)c2cc(C3CC3)on2)CC1	IC50	'>'	10000	nM			630421	UO_0000065					0	CHEMBL5732212	SMYD3 biochemical assay: The assays were all performed in a buffer consisting of 25 mM Tris-Cl pH 8.0
CHEMBL5794654		None	463.56	0	0.41	BDBM378476	NC1CCN(S(=O)(=O)N2[C@@H]3CC[C@H]2C[C@@H](NC(=O)c2ccc4c(c2)NC(=O)CO4)C3)CC1	IC50	'='	23.7	nM	7.62		756482	UO_0000065	16.45	0.33	7.22	5.69	0	CHEMBL5733491	SMYD3 Biochemical Assay: The assays were all performed in a buffer consisting of 25 mM Tris-Cl pH 8.0
CHEMBL5859338		None	303.34	0	2.08	BDBM377996	N[C@H]1CC[C@H](NC(=O)c2cc(O)nc3cc(F)ccc23)CC1	IC50	'='	91680	nM	4.04		756004	UO_0000065	13.31	0.25	1.96	4.58	0	CHEMBL5733491	SMYD3 Biochemical Assay: The assays were all performed in a buffer consisting of 25 mM Tris-Cl pH 8.0
CHEMBL5916026		None	330.39	0	0.11	BDBM378003	C[C@@H](N)C(=O)N1CC[C@@H](CNC(=O)c2ccc3c(c2)CC(=O)N3)C1	IC50	'='	10670	nM	4.97		756011	UO_0000065	15.05	0.28	4.86	4.76	0	CHEMBL5733491	SMYD3 Biochemical Assay: The assays were all performed in a buffer consisting of 25 mM Tris-Cl pH 8.0
CHEMBL5798048		None	312.42	0	2.24	BDBM377898	Cc1cc(C(=O)N[C@H]2CC[C@H](N)CC2)n(Cc2ccccc2)n1	IC50	'='	13990	nM	4.85		755910	UO_0000065	15.54	0.29	2.61	6.66	0	CHEMBL5733491	SMYD3 Biochemical Assay: The assays were all performed in a buffer consisting of 25 mM Tris-Cl pH 8.0
CHEMBL5786641		None	370.45	0	1.64	BDBM378071	CC(NC(=O)c1cc(O)nc2ccccc12)C1CCN(C(=O)[C@H](C)N)CC1	IC50	'>'	100000	nM			756077	UO_0000065					0	CHEMBL5733491	SMYD3 Biochemical Assay: The assays were all performed in a buffer consisting of 25 mM Tris-Cl pH 8.0
CHEMBL6060333		None	343.47	0	2.07	BDBM378075	NCCC(=O)N[C@H]1CC[C@H](NC(=O)c2ccc3c(c2)CCCC3)CC1	IC50	'='	11210	nM	4.95		756081	UO_0000065	14.41	0.27	2.88	5.88	0	CHEMBL5733491	SMYD3 Biochemical Assay: The assays were all performed in a buffer consisting of 25 mM Tris-Cl pH 8.0
CHEMBL5806034		None	235.29	0	0.32	BDBM378082	N[C@H]1CC[C@H](NC(=O)c2cc[n+]([O-])cc2)CC1	IC50	'>'	100000	nM			756088	UO_0000065					0	CHEMBL5733491	SMYD3 Biochemical Assay: The assays were all performed in a buffer consisting of 25 mM Tris-Cl pH 8.0
CHEMBL5854929		None	384.48	0	1.28	BDBM378089	Cc1c(C(=O)NC(C)C2CCN(C(=O)[C@H](C)N)CC2)nnn1-c1ccccc1	IC50	'>'	100000	nM			756095	UO_0000065					0	CHEMBL5733491	SMYD3 Biochemical Assay: The assays were all performed in a buffer consisting of 25 mM Tris-Cl pH 8.0
CHEMBL5795812		None	383.49	0	2.55	BDBM378092	COc1ccc2cc(C(=O)NC(C)C3CCN(C(=O)[C@H](C)N)CC3)ccc2c1	IC50	'>'	100000	nM			756098	UO_0000065					0	CHEMBL5733491	SMYD3 Biochemical Assay: The assays were all performed in a buffer consisting of 25 mM Tris-Cl pH 8.0
CHEMBL5917154		None	384.48	0	1.95	BDBM378093	COc1cc(C(=O)NC(C)C2CCN(C(=O)[C@H](C)N)CC2)c2ccccc2n1	IC50	'>'	100000	nM			756099	UO_0000065					0	CHEMBL5733491	SMYD3 Biochemical Assay: The assays were all performed in a buffer consisting of 25 mM Tris-Cl pH 8.0
CHEMBL5991665		None	370.45	0	1.75	BDBM378094	COc1cc(C(=O)N[C@H]2CC[C@H](NC(=O)CCN)CC2)c2ccccc2n1	IC50	'>'	100000	nM			756100	UO_0000065					0	CHEMBL5733491	SMYD3 Biochemical Assay: The assays were all performed in a buffer consisting of 25 mM Tris-Cl pH 8.0
CHEMBL5940448		None	291.78	0	2.82	BDBM378103	N[C@H]1CC[C@H](NC(=O)c2cc3cc(Cl)ccc3[nH]2)CC1	IC50	'='	91530	nM	4.04		756109	UO_0000065	13.84	0.28	1.22	5.7	0	CHEMBL5733491	SMYD3 Biochemical Assay: The assays were all performed in a buffer consisting of 25 mM Tris-Cl pH 8.0
CHEMBL5761836		None	343.43	0	1.27	BDBM378114	CC(NC(=O)c1nc2ccccc2[nH]1)C1CCN(C(=O)[C@H](C)N)CC1	IC50	'='	72930	nM	4.14		756120	UO_0000065	12.05	0.23	2.87	3.97	0	CHEMBL5733491	SMYD3 Biochemical Assay: The assays were all performed in a buffer consisting of 25 mM Tris-Cl pH 8.0
CHEMBL5835102		None	247.34	0	1.64	BDBM377891	CCc1cncc(C(=O)N[C@H]2CC[C@H](N)CC2)c1	IC50	'='	31290	nM	4.5		755903	UO_0000065	18.21	0.34	2.86	6.62	0	CHEMBL5733491	SMYD3 Biochemical Assay: The assays were all performed in a buffer consisting of 25 mM Tris-Cl pH 8.0
CHEMBL5958545		None	248.33	0	1.18	BDBM377895	N[C@H]1CC[C@H](NC(=O)c2cccc(CO)c2)CC1	IC50	'='	86010	nM	4.07		755907	UO_0000065	16.37	0.31	2.89	5.4	0	CHEMBL5733491	SMYD3 Biochemical Assay: The assays were all performed in a buffer consisting of 25 mM Tris-Cl pH 8.0
CHEMBL5752416		None	481.02	0	1.99	BDBM378481	O=C1Cc2cc(C(=O)N[C@H]3C[C@H]4CC[C@@H](C3)N4S(=O)(=O)CCN3CCCC3)c(Cl)cc2N1	IC50	'='	46	nM	7.34		756487	UO_0000065	15.25	0.31	5.35	7.42	0	CHEMBL5733491	SMYD3 Biochemical Assay: The assays were all performed in a buffer consisting of 25 mM Tris-Cl pH 8.0
CHEMBL5806778		None	472.51	0	1.4	BDBM378493	NC1CCN(S(=O)(=O)N2[C@@H]3CC[C@H]2C[C@@H](NC(=O)c2ccc4c(c2)OC(F)(F)O4)C3)CC1	IC50	'='	222	nM	6.65		756499	UO_0000065	14.08	0.28	5.25	5.83	0	CHEMBL5733491	SMYD3 Biochemical Assay: The assays were all performed in a buffer consisting of 25 mM Tris-Cl pH 8.0
CHEMBL5936112		None	623.49	1	2.3	BDBM432334	C[C@H](N)CC(=O)NC[C@H](Cc1ccc(O)c(I)c1)C(=O)N1CCC(NC(=O)c2cc(C3CC3)on2)CC1	IC50	'='	473	nM	6.33		877217	UO_0000065	10.14	0.23	4.03	4.19	0	CHEMBL5734901	SMYD3 Biochemical Assay: The assays were all performed in a buffer consisting of 25 mM Tris-Cl pH 8.0
CHEMBL6022433		None	374.49	0	2.18	BDBM432358	C[C@@H]1C[C@H](NC(=O)c2cc(C3CC3)on2)CCN1C(=O)[C@H]1CC[C@H](N)CC1	IC50	'='	71.6	nM	7.14		877241	UO_0000065	19.08	0.36	4.97	7.04	0	CHEMBL5734901	SMYD3 Biochemical Assay: The assays were all performed in a buffer consisting of 25 mM Tris-Cl pH 8.0
CHEMBL5910850		None	438.59	0	2.2	BDBM433071	CC[C@@H]1C[C@H](NC(=O)c2cc(C3CC3)on2)CCN1S(=O)(=O)CC1CCN(C)CC1	IC50	'='	1.07	nM	8.97		877954	UO_0000065	20.45	0.41	6.77	9.37	0	CHEMBL5734901	SMYD3 Biochemical Assay: The assays were all performed in a buffer consisting of 25 mM Tris-Cl pH 8.0
CHEMBL5861292		None	396.49	0	2.99	BDBM432976	C[C@H](N)c1ccc(C(=O)N2CC[C@@H](NC(=O)c3cc(C4CC4)on3)C[C@H]2C)cc1	IC50	'='	113	nM	6.95		877859	UO_0000065	17.52	0.33	3.96	6.85	0	CHEMBL5734901	SMYD3 Biochemical Assay: The assays were all performed in a buffer consisting of 25 mM Tris-Cl pH 8.0
CHEMBL5845495		None	410.54	0	1.59	BDBM433079	C[C@H]1C[C@@H](NC(=O)c2cc(C3CC3)on2)CCN1S(=O)(=O)C1CCC(CN)C1	IC50	'='	1.24	nM	8.91		877962	UO_0000065	21.69	0.43	7.32	7.51	0	CHEMBL5734901	SMYD3 Biochemical Assay: The assays were all performed in a buffer consisting of 25 mM Tris-Cl pH 8.0
CHEMBL5930979		None	450.61	0	2.34	BDBM433081	CCN1CCC(CS(=O)(=O)N2[C@@H]3CC[C@H]2C[C@@H](NC(=O)c2cc(C4CC4)on2)C3)CC1	IC50	'='	1.36	nM	8.87		877964	UO_0000065	19.68	0.39	6.53	9.26	0	CHEMBL5734901	SMYD3 Biochemical Assay: The assays were all performed in a buffer consisting of 25 mM Tris-Cl pH 8.0
CHEMBL5970492		None	446.57	0	2.55	BDBM433001	C[C@@H]1C[C@@H](NC(=O)c2cc(C3CC3)on2)CCN1S(=O)(=O)C(CCN)c1ccccc1	IC50	'='	218	nM	6.66		877884	UO_0000065	14.92	0.29	4.11	5.62	0	CHEMBL5734901	SMYD3 Biochemical Assay: The assays were all performed in a buffer consisting of 25 mM Tris-Cl pH 8.0
CHEMBL6014571		None	465.62	0	1.94	BDBM433006	CN1CCC(N(C)S(=O)(=O)N2[C@@H]3CCC[C@@H]2CC(NC(=O)c2cc(C4CC4)on2)C3)CC1	IC50	'='	258	nM	6.59		877889	UO_0000065	14.15	0.28	4.65	6.66	0	CHEMBL5734901	SMYD3 Biochemical Assay: The assays were all performed in a buffer consisting of 25 mM Tris-Cl pH 8.0
CHEMBL5918115		None	374.49	0	2.04	BDBM432325	C[C@H]1CN(C(=O)[C@H]2CC[C@H](N)CC2)CCC1NC(=O)c1cc(C2CC2)on1	IC50	'='	1997	nM	5.7		877208	UO_0000065	15.22	0.29	3.66	5.62	0	CHEMBL5734901	SMYD3 Biochemical Assay: The assays were all performed in a buffer consisting of 25 mM Tris-Cl pH 8.0
CHEMBL5772046		None	538.39	1	2.4	BDBM432329	NC[C@@H](Cc1ccc(O)c(I)c1)C(=O)N1CCC(NC(=O)c2cc(C3CC3)on2)CC1	IC50	'='	2043	nM	5.69		877212	UO_0000065	10.57	0.25	3.29	4.68	0	CHEMBL5734901	SMYD3 Biochemical Assay: The assays were all performed in a buffer consisting of 25 mM Tris-Cl pH 8.0
CHEMBL5801122		None	396.44	0	2.04	BDBM432453	N[C@H]1CC[C@H](C(=O)N2CCC(NC(=O)c3cc(C4CC4)on3)C(F)(F)C2)CC1	IC50	'='	2247	nM	5.65		877336	UO_0000065	14.25	0.28	3.61	5.57	0	CHEMBL5734901	SMYD3 Biochemical Assay: The assays were all performed in a buffer consisting of 25 mM Tris-Cl pH 8.0
CHEMBL5964993		None	446.57	0	2.97	BDBM432994	C[C@H]1C[C@@H](NC(=O)c2cc(C3CC3)on2)CCN1S(=O)(=O)CCCNc1ccccc1	IC50	'='	178	nM	6.75		877877	UO_0000065	15.11	0.3	3.78	6.46	0	CHEMBL5734901	SMYD3 Biochemical Assay: The assays were all performed in a buffer consisting of 25 mM Tris-Cl pH 8.0
CHEMBL5866471		None	466.6	0	1.72	BDBM433059	COCC1CCCN1CCS(=O)(=O)N1[C@@H]2CC[C@H]1C[C@@H](NC(=O)c1cc(C3CC3)on1)C2	IC50	'='	770	nM	6.11		877942	UO_0000065	13.1	0.26	4.39	5.82	0	CHEMBL5734901	SMYD3 Biochemical Assay: The assays were all performed in a buffer consisting of 25 mM Tris-Cl pH 8.0
CHEMBL5930708		None	466.6	0	1.5	BDBM433063	O=C(N[C@H]1C[C@H]2CC[C@@H](C1)N2S(=O)(=O)[C@H]1CC[C@@H](NCCO)CC1)c1cc(C2CC2)on1	IC50	'='	0.4	nM	9.4		877946	UO_0000065	20.14	0.4	7.9	7.53	0	CHEMBL5734901	SMYD3 Biochemical Assay: The assays were all performed in a buffer consisting of 25 mM Tris-Cl pH 8.0
CHEMBL5777063		None	450.61	0	2.48	BDBM433067	CN(C)[C@H]1CC[C@@H](S(=O)(=O)N2[C@@H]3CC[C@H]2C[C@@H](NC(=O)c2cc(C4CC4)on2)C3)CC1	IC50	'='	0.94	nM	9.03		877950	UO_0000065	20.03	0.4	6.55	9.43	0	CHEMBL5734901	SMYD3 Biochemical Assay: The assays were all performed in a buffer consisting of 25 mM Tris-Cl pH 8.0
CHEMBL5759159		None	410.54	0	1.59	BDBM433068	C[C@H]1C[C@@H](NC(=O)c2cc(C3CC3)on2)CCN1S(=O)(=O)C[C@H]1CC[C@H](N)C1	IC50	'='	0.95	nM	9.02		877951	UO_0000065	21.98	0.44	7.43	7.61	0	CHEMBL5734901	SMYD3 Biochemical Assay: The assays were all performed in a buffer consisting of 25 mM Tris-Cl pH 8.0
CHEMBL5795016		None	396.49	0	2.09	BDBM432311	NC[C@@H](Cc1ccccc1)C(=O)N1CCC(NC(=O)c2cc(C3CC3)on2)CC1	IC50	'='	319	nM	6.5		877196	UO_0000065	16.38	0.31	4.41	6.4	0	CHEMBL5734901	SMYD3 Biochemical Assay: The assays were all performed in a buffer consisting of 25 mM Tris-Cl pH 8.0
CHEMBL5814702		None	426.52	0	2.1	BDBM432339	Cc1ccc(C[C@H](CN)C(=O)N2CCC(NC(=O)c3cc(C4CC4)on3)CC2)cc1O	IC50	'='	518	nM	6.29		877222	UO_0000065	14.74	0.28	4.19	5.17	0	CHEMBL5734901	SMYD3 Biochemical Assay: The assays were all performed in a buffer consisting of 25 mM Tris-Cl pH 8.0
CHEMBL5971426		None	410.52	0	3.17	BDBM432669	C[C@H]1C[C@H](NC(=O)c2cc(C3CC3)on2)CCN1C(=O)c1ccc(C(C)(C)N)cc1	IC50	'='	5870	nM	5.23		877552	UO_0000065	12.74	0.24	2.06	5.16	0	CHEMBL5734901	SMYD3 Biochemical Assay: The assays were all performed in a buffer consisting of 25 mM Tris-Cl pH 8.0
CHEMBL5866706		None	404.49	0	2.06	BDBM432674	C[C@@H]1C[C@@H](NC(=O)c2cc(C3CC3)on2)CCN1S(=O)(=O)Cc1cccnc1	IC50	'>'	10000	nM			877557	UO_0000065					0	CHEMBL5734901	SMYD3 Biochemical Assay: The assays were all performed in a buffer consisting of 25 mM Tris-Cl pH 8.0
CHEMBL6023718		None	339.42	0	1.61	BDBM321293	C=CS(=O)(=O)N1CCC(NC(=O)c2cc(C3CC3)on2)C[C@H]1C	IC50	'='	3676	nM	5.43		630420	UO_0000065	16.01	0.32	3.82	5.87	0	CHEMBL5732212	SMYD3 biochemical assay: The assays were all performed in a buffer consisting of 25 mM Tris-Cl pH 8.0
CHEMBL5812926		None	289.34	0	1.46	BDBM321291	C=CC(=O)N1CCC(NC(=O)c2cc(C3CC3)on2)CC1	IC50	'>'	100000	nM			912548	UO_0000065					1	CHEMBL5735277	SMYD3 Enzyme Assays on MEKK2 Protein Substrate : The assays were an performed in a buffer consisting of 25 mM Tris-Cl pH 8.0
CHEMBL5771341		None	339.42	0	1.66	BDBM321294	C=CS(=O)(=O)N[C@H]1CC[C@@H](NC(=O)c2cc(C3CC3)on2)CC1	IC50	'>'	10000	nM			912551	UO_0000065					1	CHEMBL5735277	SMYD3 Enzyme Assays on MEKK2 Protein Substrate : The assays were an performed in a buffer consisting of 25 mM Tris-Cl pH 8.0
CHEMBL5862235		None	402.48	0	1.62	BDBM377873	CC(=O)Nc1ccc(S(=O)(=O)N2CCC(NC(=O)c3ccncc3)CC2)cc1	IC50	'>'	100000	nM			755885	UO_0000065					0	CHEMBL5733491	SMYD3 Biochemical Assay: The assays were all performed in a buffer consisting of 25 mM Tris-Cl pH 8.0
CHEMBL5908987		None	432.51	0	1.15	BDBM377879	CC(=O)Nc1ccc(S(=O)(=O)N2CCC(NC(=O)c3cn(C4CC4)nn3)CC2)cc1	IC50	'='	16980	nM	4.77		755891	UO_0000065	11.03	0.22	3.62	3.78	0	CHEMBL5733491	SMYD3 Biochemical Assay: The assays were all performed in a buffer consisting of 25 mM Tris-Cl pH 8.0
CHEMBL6008294		None	462.62	0	2.04	BDBM377881	CC(=O)Nc1ccc(S(=O)(=O)N2CCC(NC(=O)C3CCN(CC4CC4)CC3)CC2)cc1	IC50	'='	45940	nM	4.34		755893	UO_0000065	9.38	0.19	2.3	4.39	0	CHEMBL5733491	SMYD3 Biochemical Assay: The assays were all performed in a buffer consisting of 25 mM Tris-Cl pH 8.0
CHEMBL5743915		None	362.41	0	0.59	BDBM377985	C[C@H](N)C(=O)N1CCC(F)(CNC(=O)c2ccc3c(c2)CC(=O)N3)CC1	IC50	'='	3860	nM	5.41		755993	UO_0000065	14.94	0.28	4.82	5.18	0	CHEMBL5733491	SMYD3 Biochemical Assay: The assays were all performed in a buffer consisting of 25 mM Tris-Cl pH 8.0
CHEMBL5779532		None	253.73	0	1.73	BDBM377989	N[C@H]1CC[C@H](NC(=O)c2cncc(Cl)c2)CC1	IC50	'='	86990	nM	4.06		755997	UO_0000065	16	0.33	2.33	5.97	0	CHEMBL5733491	SMYD3 Biochemical Assay: The assays were all performed in a buffer consisting of 25 mM Tris-Cl pH 8.0
CHEMBL6048286		None	269.3	0	2.78	BDBM377952	Cc1cc2[nH]c(C(=O)Nc3ccc(CN)cc3)cc2o1	IC50	'='	25900	nM	4.59		755961	UO_0000065	17.03	0.31	1.81	5.46	0	CHEMBL5733491	SMYD3 Biochemical Assay: The assays were all performed in a buffer consisting of 25 mM Tris-Cl pH 8.0
CHEMBL5955791		None	329.47	0	3.18	BDBM377930	CCc1ncc(C(=O)NC(c2ccccc2)C2CCNCC2)s1	IC50	'='	149920	nM		Outside typical range	755940	UO_0000065					0	CHEMBL5733491	SMYD3 Biochemical Assay: The assays were all performed in a buffer consisting of 25 mM Tris-Cl pH 8.0
CHEMBL5993940		None	415.59	0	0.96	BDBM378496	CCc1cc(C(=O)N[C@@H]2CCN(S(=O)(=O)N3CCC(N)CC3)[C@@H](C)C2)ns1	IC50	'='	326	nM	6.49		756502	UO_0000065	15.61	0.33	5.53	5.97	0	CHEMBL5733491	SMYD3 Biochemical Assay: The assays were all performed in a buffer consisting of 25 mM Tris-Cl pH 8.0
CHEMBL5788627		None	327.82	0	0.77	BDBM378394	CC(NC(=O)c1cc(Cl)[nH]n1)C1CCN(C(=O)[C@H](C)N)CC1	IC50	'>'	50000	nM			756400	UO_0000065					0	CHEMBL5733491	SMYD3 Biochemical Assay: The assays were all performed in a buffer consisting of 25 mM Tris-Cl pH 8.0
CHEMBL5742286		None	273.34	0	0.93	BDBM378356	N[C@H]1CC[C@H](NC(=O)c2ccc3c(c2)CNC3=O)CC1	IC50	'='	37890	nM	4.42		756362	UO_0000065	16.18	0.3	3.49	5.25	0	CHEMBL5733491	SMYD3 Biochemical Assay: The assays were all performed in a buffer consisting of 25 mM Tris-Cl pH 8.0
CHEMBL5980745		None	293.37	0	2.44	BDBM378369	N[C@H]1CC[C@H](NC(=O)c2nc3ccc(F)cc3s2)CC1	IC50	'>'	100000	nM			756375	UO_0000065					0	CHEMBL5733491	SMYD3 Biochemical Assay: The assays were all performed in a buffer consisting of 25 mM Tris-Cl pH 8.0
CHEMBL6055424		None	371.46	0	1.11	BDBM432515	COCCS(=O)(=O)N1CC[C@H](NC(=O)c2cc(C3CC3)on2)C[C@H]1C	IC50	'>'	10000	nM			877398	UO_0000065					0	CHEMBL5734901	SMYD3 Biochemical Assay: The assays were all performed in a buffer consisting of 25 mM Tris-Cl pH 8.0
CHEMBL5740080		None	390.48	0	1.17	BDBM432523	C[C@H]1CC(NC(=O)c2cc(C3CC3)on2)CCN1C(=O)CC1(O)CCNCC1	IC50	'='	7189	nM	5.14		877406	UO_0000065	13.17	0.25	3.97	4.78	0	CHEMBL5734901	SMYD3 Biochemical Assay: The assays were all performed in a buffer consisting of 25 mM Tris-Cl pH 8.0
CHEMBL5994122		None	336.39	0	0.03	BDBM293363	NCC(O)C(=O)N[C@H]1CC[C@H](NC(=O)c2cc(C3CC3)on2)CC1	IC50	'='	567	nM	6.25		559180	UO_0000065	18.57	0.36	6.22	4.79	0	CHEMBL5731515	SMYD3 Biochemical Assay: S-adenosylmethionine (SAM)
CHEMBL5928001		None	378.47	0	1.42	BDBM293380	COCCN(C(=O)c1cc(C2CC2)on1)[C@H]1CC[C@H](NC(=O)CCN)CC1	IC50	'='	16360	nM	4.79		559197	UO_0000065	12.65	0.24	3.37	4.32	0	CHEMBL5731515	SMYD3 Biochemical Assay: S-adenosylmethionine (SAM)
CHEMBL5951417		None	424.55	0	3.36	BDBM293381	C[C@@H](N)CC(=O)N[C@H]1CC[C@H](N(Cc2ccccc2)C(=O)c2cc(C3CC3)on2)CC1	IC50	'='	8220	nM	5.08		559198	UO_0000065	11.98	0.22	1.73	5.01	0	CHEMBL5731515	SMYD3 Biochemical Assay: S-adenosylmethionine (SAM)
CHEMBL5742143		None	325.39	0	1.22	BDBM321295	C=CS(=O)(=O)N1CCC(NC(=O)c2cc(C3CC3)on2)CC1	IC50	'='	31657	nM	4.5		912552	UO_0000065	13.83	0.28	3.28	4.86	1	CHEMBL5735277	SMYD3 Enzyme Assays on MEKK2 Protein Substrate : The assays were an performed in a buffer consisting of 25 mM Tris-Cl pH 8.0
CHEMBL5763577		None	320.39	0	0.49	BDBM378380	CC(NC(=O)c1ncccc1O)C1CCN(C(=O)[C@H](C)N)CC1	IC50	'>'	50000	nM			756386	UO_0000065					0	CHEMBL5733491	SMYD3 Biochemical Assay: The assays were all performed in a buffer consisting of 25 mM Tris-Cl pH 8.0
CHEMBL5966924		None	235.29	0	0.79	BDBM378384	N[C@H]1CC[C@H](NC(=O)c2cncc(O)c2)CC1	IC50	'>'	50000	nM			756390	UO_0000065					0	CHEMBL5733491	SMYD3 Biochemical Assay: The assays were all performed in a buffer consisting of 25 mM Tris-Cl pH 8.0
CHEMBL6046017		None	296.33	0	-1.4	BDBM378397	NCCC(=O)N[C@H]1CC[C@H](NC(=O)c2n[nH]c(=O)[nH]2)CC1	IC50	'>'	50000	nM			756403	UO_0000065					0	CHEMBL5733491	SMYD3 Biochemical Assay: The assays were all performed in a buffer consisting of 25 mM Tris-Cl pH 8.0
CHEMBL5932293		None	223.28	0	-0.19	BDBM378411	Cn1cnc(C(=O)N[C@H]2CC[C@H](N)CC2)n1	IC50	'>'	50000	nM			756417	UO_0000065					0	CHEMBL5733491	SMYD3 Biochemical Assay: The assays were all performed in a buffer consisting of 25 mM Tris-Cl pH 8.0
CHEMBL6046941		None	368.53	0	3.54	BDBM378211	Cc1cccc(Cn2nc(C(C)(C)C)cc2C(=O)N[C@H]2CC[C@H](N)CC2)c1	IC50	'>'	100000	nM			756217	UO_0000065					0	CHEMBL5733491	SMYD3 Biochemical Assay: The assays were all performed in a buffer consisting of 25 mM Tris-Cl pH 8.0
CHEMBL5850361		None	223.28	0	0.15	BDBM378428	CN(C(=O)c1ncn[nH]1)[C@H]1CC[C@H](N)CC1	IC50	'>'	10000	nM			756434	UO_0000065					0	CHEMBL5733491	SMYD3 Biochemical Assay: The assays were all performed in a buffer consisting of 25 mM Tris-Cl pH 8.0
CHEMBL5768061		None	359.43	0	0.56	BDBM377964	CC(NC(=O)c1ccc2[nH]c(=O)[nH]c2c1)C1CCN(C(=O)[C@H](C)N)CC1	IC50	'='	6760	nM	5.17		755973	UO_0000065	14.38	0.27	4.61	4.17	0	CHEMBL5733491	SMYD3 Biochemical Assay: The assays were all performed in a buffer consisting of 25 mM Tris-Cl pH 8.0
CHEMBL5819892		None	371.44	0	1.04	BDBM377970	CC(NC(=O)c1ccc2ncc(O)nc2c1)C1CCN(C(=O)[C@H](C)N)CC1	IC50	'='	35730	nM	4.45		755979	UO_0000065	11.97	0.22	3.41	3.66	0	CHEMBL5733491	SMYD3 Biochemical Assay: The assays were all performed in a buffer consisting of 25 mM Tris-Cl pH 8.0
CHEMBL5951885		None	287.36	0	1.21	BDBM377955	CN1C(=O)Cc2cc(C(=O)N[C@H]3CC[C@H](N)CC3)ccc21	IC50	'='	16660	nM	4.78		755964	UO_0000065	16.63	0.31	3.57	6.33	0	CHEMBL5733491	SMYD3 Biochemical Assay: The assays were all performed in a buffer consisting of 25 mM Tris-Cl pH 8.0
CHEMBL5757525		None	235.29	0	0.79	BDBM378292	N[C@H]1CC[C@H](NC(=O)c2ccc(O)cn2)CC1	IC50	'>'	100000	nM			756298	UO_0000065					0	CHEMBL5733491	SMYD3 Biochemical Assay: The assays were all performed in a buffer consisting of 25 mM Tris-Cl pH 8.0
CHEMBL5963646		None	357.41	0	1.3	BDBM378197	NCCC(=O)N[C@H]1CC[C@H](NC(=O)c2cc(=O)c3ccccc3o2)CC1	IC50	'>'	100000	nM			756203	UO_0000065					0	CHEMBL5733491	SMYD3 Biochemical Assay: The assays were all performed in a buffer consisting of 25 mM Tris-Cl pH 8.0
CHEMBL5794687		None	274.32	0	0.58	BDBM377915	N[C@H]1CC[C@H](NC(=O)c2cnc3c(c2)CC(=O)N3)CC1	IC50	'='	11940	nM	4.92		755927	UO_0000065	17.95	0.34	4.34	5.07	0	CHEMBL5733491	SMYD3 Biochemical Assay: The assays were all performed in a buffer consisting of 25 mM Tris-Cl pH 8.0
CHEMBL5907822		None	321.38	0	-0.11	BDBM378378	CC(NC(=O)c1cncnc1O)C1CCN(C(=O)[C@H](C)N)CC1	IC50	'>'	50000	nM			756384	UO_0000065					0	CHEMBL5733491	SMYD3 Biochemical Assay: The assays were all performed in a buffer consisting of 25 mM Tris-Cl pH 8.0
CHEMBL5898960		None	306.37	0	0.29	BDBM378383	NCCC(=O)N[C@H]1CC[C@H](NC(=O)c2cncc(O)c2)CC1	IC50	'>'	50000	nM			756389	UO_0000065					0	CHEMBL5733491	SMYD3 Biochemical Assay: The assays were all performed in a buffer consisting of 25 mM Tris-Cl pH 8.0
CHEMBL6008317		None	279.34	0	-0.08	BDBM378387	NCCC(=O)NC1CCC(NC(=O)c2ncc[nH]2)CC1	IC50	'>'	50000	nM			756393	UO_0000065					0	CHEMBL5733491	SMYD3 Biochemical Assay: The assays were all performed in a buffer consisting of 25 mM Tris-Cl pH 8.0
CHEMBL4527547		None	514.69	1	3.73	38	Cc1ccc(CN[C@H]2CC[C@H](CS(=O)(=O)N3CCC(NC(=O)c4cc(C5CC5)on4)CC3)CC2)cc1	IC50	'='	20	nM	7.7			UO_0000065	14.96	0.29	3.97	7.36	0	CHEMBL4338950	Inhibition of recombinant N-terminal FLAG/His-tagged SMYD3 (unknown origin) expressed in baculovirus infected insect cells using 3H-SAM as substrate assessed as 3H-MEKK2 methylation incubated for 40 mins by scintillation proximity assay	B	BAO_0000219	cell-based format	Homo sapiens	None	None	None	None				CHEMBL2321643	Histone-lysine N-methyltransferase SMYD3	Homo sapiens	SINGLE PROTEIN	CHEMBL4334548	1	Scientific Literature	ACS Med Chem Lett	2020	None				20
CHEMBL5933290		None	260.34	0	1.89	BDBM377892	CC(=O)c1cccc(C(=O)N[C@H]2CC[C@H](N)CC2)c1	IC50	'='	91550	nM	4.04		755904	UO_0000065	15.51	0.29	2.15	5.59	0	CHEMBL5733491	SMYD3 Biochemical Assay: The assays were all performed in a buffer consisting of 25 mM Tris-Cl pH 8.0
CHEMBL5801917		None	405.48	0	0.96	BDBM377878	CC(=O)Nc1ccc(S(=O)(=O)N2CCC(NC(=O)c3cn(C)cn3)CC2)cc1	IC50	'='	60500	nM	4.22		755890	UO_0000065	10.4	0.21	3.26	3.72	0	CHEMBL5733491	SMYD3 Biochemical Assay: The assays were all performed in a buffer consisting of 25 mM Tris-Cl pH 8.0
CHEMBL5886581		None	253.37	0	1.71	BDBM377886	CCc1cc(C(=O)N[C@H]2CC[C@H](N)CC2)ns1	IC50	'='	13520	nM	4.87		755898	UO_0000065	19.22	0.39	3.16	7.16	0	CHEMBL5733491	SMYD3 Biochemical Assay: The assays were all performed in a buffer consisting of 25 mM Tris-Cl pH 8.0
CHEMBL5784537		None	371.44	0	1.55	BDBM378006	Cc1nc(-c2ccc(C(=O)N[C@H]3CC[C@H](NC(=O)CCN)CC3)cc2)no1	IC50	'>'	100000	nM			756014	UO_0000065					0	CHEMBL5733491	SMYD3 Biochemical Assay: The assays were all performed in a buffer consisting of 25 mM Tris-Cl pH 8.0
CHEMBL5902154		None	320.39	0	0.02	BDBM378081	CC(NC(=O)c1cc[n+]([O-])cc1)C1CCN(C(=O)[C@H](C)N)CC1	IC50	'>'	100000	nM			756087	UO_0000065					0	CHEMBL5733491	SMYD3 Biochemical Assay: The assays were all performed in a buffer consisting of 25 mM Tris-Cl pH 8.0
CHEMBL5832074		None	372.51	0	1.99	BDBM378099	CC(NC(=O)c1ccc(N2CCCC2)cc1)C1CCN(C(=O)[C@H](C)N)CC1	IC50	'='	29170	nM	4.54		756105	UO_0000065	12.17	0.23	2.55	5.76	0	CHEMBL5733491	SMYD3 Biochemical Assay: The assays were all performed in a buffer consisting of 25 mM Tris-Cl pH 8.0
CHEMBL5882284		None	376.89	0	2.53	BDBM378101	CC(NC(=O)c1cc2cc(Cl)ccc2[nH]1)C1CCN(C(=O)[C@H](C)N)CC1	IC50	'='	77900	nM	4.11		756107	UO_0000065	10.9	0.22	1.58	4.5	0	CHEMBL5733491	SMYD3 Biochemical Assay: The assays were all performed in a buffer consisting of 25 mM Tris-Cl pH 8.0
CHEMBL5957763		None	257.34	0	2.17	BDBM378106	N[C@H]1CC[C@H](NC(=O)c2cc3ccccc3[nH]2)CC1	IC50	'>'	100000	nM			756112	UO_0000065					0	CHEMBL5733491	SMYD3 Biochemical Assay: The assays were all performed in a buffer consisting of 25 mM Tris-Cl pH 8.0
CHEMBL5978700		None	346.46	0	1.8	BDBM378152	NCCC(=O)N[C@H]1CC[C@H](NC(=O)c2ccc3ncsc3c2)CC1	IC50	'='	28960	nM	4.54		756158	UO_0000065	13.1	0.26	2.74	4.67	0	CHEMBL5733491	SMYD3 Biochemical Assay: The assays were all performed in a buffer consisting of 25 mM Tris-Cl pH 8.0
CHEMBL5956372		None	329.49	0	2.58	BDBM377981	CC(CN1CCCC1)C(=O)NC(c1ccccc1)C1CCNCC1	IC50	'='	79040	nM	4.1		755989	UO_0000065	12.45	0.23	1.52	9.25	0	CHEMBL5733491	SMYD3 Biochemical Assay: The assays were all performed in a buffer consisting of 25 mM Tris-Cl pH 8.0
CHEMBL6003338		None	257.34	0	2.17	BDBM378064	N[C@H]1CC[C@H](NC(=O)c2ccc3[nH]ccc3c2)CC1	IC50	'>'	100000	nM			756070	UO_0000065					0	CHEMBL5733491	SMYD3 Biochemical Assay: The assays were all performed in a buffer consisting of 25 mM Tris-Cl pH 8.0
CHEMBL5837274		None	340.43	0	1.74	BDBM378068	NCCC(=O)N[C@H]1CC[C@H](NC(=O)c2nccc3ccccc23)CC1	IC50	'>'	100000	nM			756074	UO_0000065					0	CHEMBL5733491	SMYD3 Biochemical Assay: The assays were all performed in a buffer consisting of 25 mM Tris-Cl pH 8.0
CHEMBL5990725		None	335.42	0	1.46	BDBM378078	CC(NC(=O)Cc1ccc(F)cc1)C1CCN(C(=O)[C@H](C)N)CC1	IC50	'>'	100000	nM			756084	UO_0000065					0	CHEMBL5733491	SMYD3 Biochemical Assay: The assays were all performed in a buffer consisting of 25 mM Tris-Cl pH 8.0
CHEMBL5799425		None	290.37	0	0.59	BDBM378135	NCCC(=O)N[C@H]1CC[C@H](NC(=O)c2ccncc2)CC1	IC50	'>'	100000	nM			756141	UO_0000065					0	CHEMBL5733491	SMYD3 Biochemical Assay: The assays were all performed in a buffer consisting of 25 mM Tris-Cl pH 8.0
CHEMBL5901998		None	342.44	0	1.87	BDBM378139	CC(NC(=O)c1c[nH]c2ccccc12)C1CCN(C(=O)[C@H](C)N)CC1	IC50	'>'	100000	nM			756145	UO_0000065					0	CHEMBL5733491	SMYD3 Biochemical Assay: The assays were all performed in a buffer consisting of 25 mM Tris-Cl pH 8.0
CHEMBL5894497		None	345.4	0	0.93	BDBM378109	CC(NC(=O)c1ccc2nonc2c1)C1CCN(C(=O)[C@H](C)N)CC1	IC50	'>'	100000	nM			756115	UO_0000065					0	CHEMBL5733491	SMYD3 Biochemical Assay: The assays were all performed in a buffer consisting of 25 mM Tris-Cl pH 8.0
CHEMBL5773708		None	356.47	0	1.88	BDBM378115	CC(NC(=O)c1cc2ccccc2n1C)C1CCN(C(=O)[C@H](C)N)CC1	IC50	'>'	100000	nM			756121	UO_0000065					0	CHEMBL5733491	SMYD3 Biochemical Assay: The assays were all performed in a buffer consisting of 25 mM Tris-Cl pH 8.0
CHEMBL6061268		None	388.51	0	2.3	BDBM432660	C[C@H](C(=O)N1CC[C@H](NC(=O)c2cc(C3CC3)on2)C[C@@H]1C)C1CCNCC1	IC50	'='	792	nM	6.1		877543	UO_0000065	15.7	0.3	3.8	6.98	0	CHEMBL5734901	SMYD3 Biochemical Assay: The assays were all performed in a buffer consisting of 25 mM Tris-Cl pH 8.0
CHEMBL6043868		None	370.48	0	0.67	BDBM432686	C[C@H]1CN(S(=O)(=O)CCCN)CC[C@H]1NC(=O)c1cc(C2CC2)on1	IC50	'='	28.2	nM	7.55		877569	UO_0000065	20.38	0.41	6.88	6.37	0	CHEMBL5734901	SMYD3 Biochemical Assay: The assays were all performed in a buffer consisting of 25 mM Tris-Cl pH 8.0
CHEMBL5843754		None	370.48	0	0.67	BDBM432688	C[C@@H]1CN(S(=O)(=O)CCCN)CC[C@H]1NC(=O)c1cc(C2CC2)on1	IC50	'='	462	nM	6.33		877571	UO_0000065	17.1	0.35	5.67	5.34	0	CHEMBL5734901	SMYD3 Biochemical Assay: The assays were all performed in a buffer consisting of 25 mM Tris-Cl pH 8.0
CHEMBL5951484		None	410.54	0	1.46	BDBM432717	C[C@H]1C[C@@H](NC(=O)c2cc(C3CC3)on2)CCN1S(=O)(=O)CC1CCNCC1	IC50	'='	3.07	nM	8.51		877600	UO_0000065	20.74	0.42	7.05	8.14	0	CHEMBL5734901	SMYD3 Biochemical Assay: The assays were all performed in a buffer consisting of 25 mM Tris-Cl pH 8.0
CHEMBL5885599		None	412.56	0	1.85	BDBM432930	CC(C)NCCCS(=O)(=O)N1CC[C@H](NC(=O)c2cc(C3CC3)on2)C[C@@H]1C	IC50	'='	30.4	nM	7.52		877813	UO_0000065	18.22	0.37	5.67	7.19	0	CHEMBL5734901	SMYD3 Biochemical Assay: The assays were all performed in a buffer consisting of 25 mM Tris-Cl pH 8.0
CHEMBL5880956		None	384.5	0	1.06	BDBM432939	C[C@@H]1CN(S(=O)(=O)CCCN)[C@H](C)C[C@@H]1NC(=O)c1cc(C2CC2)on1	IC50	'='	37.6	nM	7.42		877822	UO_0000065	19.31	0.39	6.36	6.26	0	CHEMBL5734901	SMYD3 Biochemical Assay: The assays were all performed in a buffer consisting of 25 mM Tris-Cl pH 8.0
CHEMBL5899121		None	530.69	1	2.39	BDBM432959	O=C(N[C@H]1CCN(S(=O)(=O)CC2CCN(CCO)CC2)[C@@H](Cc2ccccc2)C1)c1cc(C2CC2)on1	IC50	'='	80.1	nM	7.1		877842	UO_0000065	13.37	0.26	4.71	6.12	0	CHEMBL5734901	SMYD3 Biochemical Assay: The assays were all performed in a buffer consisting of 25 mM Tris-Cl pH 8.0
CHEMBL5777425		None	348.45	0	1.79	BDBM432480	C[C@@H]1C[C@@H](NC(=O)c2cc(C3CC3)on2)CCN1C(=O)CCCCN	IC50	'='	1422	nM	5.85		877363	UO_0000065	16.78	0.32	4.06	5.76	0	CHEMBL5734901	SMYD3 Biochemical Assay: The assays were all performed in a buffer consisting of 25 mM Tris-Cl pH 8.0
CHEMBL5846147		None	394.5	0	0.75	BDBM432482	NCCCS(=O)(=O)C12CC3CC(NC(=O)c4cc(C5CC5)on4)CC(C1)N32	IC50	'='	92.7	nM	7.03		877365	UO_0000065	17.83	0.36	6.28	5.93	0	CHEMBL5734901	SMYD3 Biochemical Assay: The assays were all performed in a buffer consisting of 25 mM Tris-Cl pH 8.0
CHEMBL5994821		None	374.49	0	2.18	BDBM432451	CC1(NC(=O)c2cc(C3CC3)on2)CCN(C(=O)[C@H]2CC[C@H](N)CC2)CC1	IC50	'='	910	nM	6.04		877334	UO_0000065	16.13	0.31	3.86	5.95	0	CHEMBL5734901	SMYD3 Biochemical Assay: The assays were all performed in a buffer consisting of 25 mM Tris-Cl pH 8.0
CHEMBL5969502		None	374.49	0	2.05	BDBM432454	CC1(NC(=O)c2cc(C3CC3)on2)CCN(C(=O)CC2CCNCC2)CC1	IC50	'='	848	nM	6.07		877337	UO_0000065	16.21	0.31	4.02	6.94	0	CHEMBL5734901	SMYD3 Biochemical Assay: The assays were all performed in a buffer consisting of 25 mM Tris-Cl pH 8.0
CHEMBL5833442		None	358.44	0	0.89	BDBM377957	CC(NC(=O)c1ccc2c(c1)CC(=O)N2)C1CCN(C(=O)[C@H](C)N)CC1	IC50	'='	1430	nM	5.84		755966	UO_0000065	16.31	0.31	4.95	5.59	0	CHEMBL5733491	SMYD3 Biochemical Assay: The assays were all performed in a buffer consisting of 25 mM Tris-Cl pH 8.0
CHEMBL5843959		None	262.38	0	0.2	BDBM377949	CCS(=O)(=O)C(C)C(=O)N[C@H]1CC[C@H](N)CC1	IC50	'='	35190	nM	4.45		755958	UO_0000065	16.97	0.36	4.25	4.99	0	CHEMBL5733491	SMYD3 Biochemical Assay: The assays were all performed in a buffer consisting of 25 mM Tris-Cl pH 8.0
CHEMBL5796059		None	275.31	0	1.12	BDBM377960	N[C@H]1CC[C@H](NC(=O)c2ccc3oc(=O)[nH]c3c2)CC1	IC50	'='	140170	nM		Outside typical range	755969	UO_0000065					0	CHEMBL5733491	SMYD3 Biochemical Assay: The assays were all performed in a buffer consisting of 25 mM Tris-Cl pH 8.0
CHEMBL6032878		None	287.36	0	1.57	BDBM377962	N[C@H]1CC[C@H](NC(=O)c2ccc3c(c2)NC(=O)CC3)CC1	IC50	'='	89470	nM	4.05		755971	UO_0000065	14.09	0.26	2.48	4.81	0	CHEMBL5733491	SMYD3 Biochemical Assay: The assays were all performed in a buffer consisting of 25 mM Tris-Cl pH 8.0
CHEMBL5739708		None	372.47	0	1.28	BDBM377963	CC(NC(=O)c1ccc2c(c1)NC(=O)CC2)C1CCN(C(=O)[C@H](C)N)CC1	IC50	'='	49950	nM	4.3		755972	UO_0000065	11.55	0.22	3.02	4.12	0	CHEMBL5733491	SMYD3 Biochemical Assay: The assays were all performed in a buffer consisting of 25 mM Tris-Cl pH 8.0
CHEMBL6058782		None	374.49	0	3.65	BDBM377900	Cc1cc(C(=O)NC(c2ccccc2)C2CCNCC2)n(-c2ccccc2)n1	IC50	'='	56660	nM	4.25		755912	UO_0000065	11.34	0.21	0.6	7.2	0	CHEMBL5733491	SMYD3 Biochemical Assay: The assays were all performed in a buffer consisting of 25 mM Tris-Cl pH 8.0
CHEMBL5935430		None	269.35	0	2.23	BDBM378038	N[C@H]1CC[C@H](NC(=O)c2ccc3cnccc3c2)CC1	IC50	'='	20700	nM	4.68		756044	UO_0000065	17.39	0.32	2.45	6.89	0	CHEMBL5733491	SMYD3 Biochemical Assay: The assays were all performed in a buffer consisting of 25 mM Tris-Cl pH 8.0
CHEMBL5758840		None	356.47	0	1.8	BDBM378039	CC(NC(=O)Cc1c[nH]c2ccccc12)C1CCN(C(=O)[C@H](C)N)CC1	IC50	'>'	100000	nM			756045	UO_0000065					0	CHEMBL5733491	SMYD3 Biochemical Assay: The assays were all performed in a buffer consisting of 25 mM Tris-Cl pH 8.0
CHEMBL6013518		None	363.51	0	1.42	BDBM378131	CC(NC(=O)c1cc(C(C)(C)C)nn1C)C1CCN(C(=O)[C@H](C)N)CC1	IC50	'>'	100000	nM			756137	UO_0000065					0	CHEMBL5733491	SMYD3 Biochemical Assay: The assays were all performed in a buffer consisting of 25 mM Tris-Cl pH 8.0
CHEMBL4473729		None	452.62	0	2.63	21	CCCN[C@H]1CC[C@H](CS(=O)(=O)N2CCC(NC(=O)c3cc(C4CC4)on3)CC2)CC1	IC50	'='	32	nM	7.5			UO_0000065	16.56	0.33	4.86	7.17	0	CHEMBL4338950	Inhibition of recombinant N-terminal FLAG/His-tagged SMYD3 (unknown origin) expressed in baculovirus infected insect cells using 3H-SAM as substrate assessed as 3H-MEKK2 methylation incubated for 40 mins by scintillation proximity assay	B	BAO_0000219	cell-based format	Homo sapiens	None	None	None	None				CHEMBL2321643	Histone-lysine N-methyltransferase SMYD3	Homo sapiens	SINGLE PROTEIN	CHEMBL4334548	1	Scientific Literature	ACS Med Chem Lett	2020	None				32
CHEMBL4460946		None	520.62	1	3.57	28	O=C(NC1CCN(S(=O)(=O)C[C@H]2CC[C@H](NCCCC(F)(F)F)CC2)CC1)c1cc(C2CC2)on1	IC50	'='	3.2	nM	8.49			UO_0000065	16.32	0.33	4.92	8.13	0	CHEMBL4338950	Inhibition of recombinant N-terminal FLAG/His-tagged SMYD3 (unknown origin) expressed in baculovirus infected insect cells using 3H-SAM as substrate assessed as 3H-MEKK2 methylation incubated for 40 mins by scintillation proximity assay	B	BAO_0000219	cell-based format	Homo sapiens	None	None	None	None				CHEMBL2321643	Histone-lysine N-methyltransferase SMYD3	Homo sapiens	SINGLE PROTEIN	CHEMBL4334548	1	Scientific Literature	ACS Med Chem Lett	2020	None				3.2
CHEMBL4452997		None	534.65	1	3.91	29	CN(CCCC(F)(F)F)[C@H]1CC[C@H](CS(=O)(=O)N2CCC(NC(=O)c3cc(C4CC4)on3)CC2)CC1	IC50	'<'	1	nM				UO_0000065					0	CHEMBL4338950	Inhibition of recombinant N-terminal FLAG/His-tagged SMYD3 (unknown origin) expressed in baculovirus infected insect cells using 3H-SAM as substrate assessed as 3H-MEKK2 methylation incubated for 40 mins by scintillation proximity assay	B	BAO_0000219	cell-based format	Homo sapiens	None	None	None	None				CHEMBL2321643	Histone-lysine N-methyltransferase SMYD3	Homo sapiens	SINGLE PROTEIN	CHEMBL4334548	1	Scientific Literature	ACS Med Chem Lett	2020	None				1
CHEMBL5633117		None	376.46	0	2.31	40	NCc1ccc(Nc2ncnc3cc(C(=O)NC4CCNCC4)ccc23)cc1	IC50	'>'	100000	nM				UO_0000065					0	CHEMBL5628408	Displacement of 3H-SAM from SMYD3 (unknown origin) using biotinylated-MAP3K2 as substrate incubated for 45 mins by SPA assay	B	BAO_0000357	single protein format	Homo sapiens	None	None	None	None				CHEMBL2321643	Histone-lysine N-methyltransferase SMYD3	Homo sapiens	SINGLE PROTEIN	CHEMBL5625232	1	Scientific Literature	Eur J Med Chem	2023	None	TIME = 0.75 hr			100
CHEMBL5991469		None	410.52	0	2.79	BDBM432613	C[C@@H]1C[C@@H](NC(=O)c2cc(C3CC3)on2)CCN1C(=O)CC(CN)c1ccccc1	IC50	'='	5024	nM	5.3		877496	UO_0000065	12.91	0.24	2.51	5.22	0	CHEMBL5734901	SMYD3 Biochemical Assay: The assays were all performed in a buffer consisting of 25 mM Tris-Cl pH 8.0
CHEMBL6020220		None	355.5	0	2.62	BDBM432616	CCCCS(=O)(=O)N1CC[C@H](NCc2cc(C3CC3)on2)C[C@@H]1C	IC50	'='	237	nM	6.62		877499	UO_0000065	18.64	0.38	4.01	8.78	0	CHEMBL5734901	SMYD3 Biochemical Assay: The assays were all performed in a buffer consisting of 25 mM Tris-Cl pH 8.0
CHEMBL5834698		None	404.49	0	2.06	BDBM432625	C[C@H]1C[C@H](NC(=O)c2cc(C3CC3)on2)CCN1S(=O)(=O)Cc1cccnc1	IC50	'>'	10000	nM			877508	UO_0000065					0	CHEMBL5734901	SMYD3 Biochemical Assay: The assays were all performed in a buffer consisting of 25 mM Tris-Cl pH 8.0
CHEMBL5743351		None	385.49	0	1.5	BDBM432627	COCCCS(=O)(=O)N1CC[C@@H](NC(=O)c2cc(C3CC3)on2)C[C@@H]1C	IC50	'>'	10000	nM			877510	UO_0000065					0	CHEMBL5734901	SMYD3 Biochemical Assay: The assays were all performed in a buffer consisting of 25 mM Tris-Cl pH 8.0
CHEMBL5923516		None	410.52	0	2.62	BDBM432633	NCCCC(=O)N1CC[C@@H](NC(=O)c2cc(C3CC3)on2)C[C@H]1Cc1ccccc1	IC50	'>'	10000	nM			877516	UO_0000065					0	CHEMBL5734901	SMYD3 Biochemical Assay: The assays were all performed in a buffer consisting of 25 mM Tris-Cl pH 8.0
CHEMBL5965741		None	374.49	0	2.04	BDBM432449	C[C@@H]1CN(C(=O)[C@H]2CC[C@H](N)CC2)CC[C@@H]1NC(=O)c1cc(C2CC2)on1	IC50	'='	282	nM	6.55		877332	UO_0000065	17.49	0.33	4.51	6.46	0	CHEMBL5734901	SMYD3 Biochemical Assay: The assays were all performed in a buffer consisting of 25 mM Tris-Cl pH 8.0
CHEMBL5865274		None	374.49	0	1.91	BDBM432450	C[C@@H]1CN(C(=O)CC2CCNCC2)CC[C@@H]1NC(=O)c1cc(C2CC2)on1	IC50	'='	291	nM	6.54		877333	UO_0000065	17.45	0.33	4.63	7.47	0	CHEMBL5734901	SMYD3 Biochemical Assay: The assays were all performed in a buffer consisting of 25 mM Tris-Cl pH 8.0
CHEMBL6035034		None	342.42	0	0.6	BDBM432517	CNS(=O)(=O)N1CC[C@@H](NC(=O)c2cc(C3CC3)on2)C[C@H]1C	IC50	'='	6758	nM	5.17		877400	UO_0000065	15.1	0.31	4.57	4.95	0	CHEMBL5734901	SMYD3 Biochemical Assay: The assays were all performed in a buffer consisting of 25 mM Tris-Cl pH 8.0
CHEMBL5812903		None	360.46	0	1.61	BDBM432319	CN1CCC(C(=O)N2CCC(NC(=O)c3cc(C4CC4)on3)CC2)CC1	IC50	'='	10042	nM	5		877202	UO_0000065	13.87	0.26	3.39	6.35	0	CHEMBL5734901	SMYD3 Biochemical Assay: The assays were all performed in a buffer consisting of 25 mM Tris-Cl pH 8.0
CHEMBL5949936		None	353.44	0	1.63	BDBM432547	C[C@H]1C[C@H](NC(=O)c2cc(C3CC3)on2)CCN1S(=O)(=O)C1CC1	IC50	'>'	10000	nM			877430	UO_0000065					0	CHEMBL5734901	SMYD3 Biochemical Assay: The assays were all performed in a buffer consisting of 25 mM Tris-Cl pH 8.0
CHEMBL5790886		None	388.51	0	2.3	BDBM432658	C[C@H](C(=O)N1CC[C@@H](NC(=O)c2cc(C3CC3)on2)C[C@@H]1C)C1CCNCC1	IC50	'='	3399	nM	5.47		877541	UO_0000065	14.08	0.27	3.17	6.25	0	CHEMBL5734901	SMYD3 Biochemical Assay: The assays were all performed in a buffer consisting of 25 mM Tris-Cl pH 8.0
CHEMBL5968591		None	390.48	0	1.15	BDBM432663	N[C@H]1CC[C@H](C(=O)N2CC[C@@H](NC(=O)c3cc(C4CC4)on3)C[C@@H]2CO)CC1	IC50	'='	1985	nM	5.7		877546	UO_0000065	14.6	0.28	4.55	4.69	0	CHEMBL5734901	SMYD3 Biochemical Assay: The assays were all performed in a buffer consisting of 25 mM Tris-Cl pH 8.0
CHEMBL5770016		None	414.49	0	2.4	BDBM432654	C[C@@H]1C[C@H](NC(=O)c2cc(C3CC3)on2)CCN1S(=O)(=O)c1cccc(C#N)c1	IC50	'='	1137	nM	5.94		877537	UO_0000065	14.34	0.28	3.54	5.11	0	CHEMBL5734901	SMYD3 Biochemical Assay: The assays were all performed in a buffer consisting of 25 mM Tris-Cl pH 8.0
CHEMBL6016638		None	450.58	0	3.4	BDBM432664	N[C@H]1CC[C@H](C(=O)N2CC[C@H](NC(=O)c3cc(C4CC4)on3)C[C@H]2Cc2ccccc2)CC1	IC50	'='	4567	nM	5.34		877547	UO_0000065	11.85	0.22	1.94	5.26	0	CHEMBL5734901	SMYD3 Biochemical Assay: The assays were all performed in a buffer consisting of 25 mM Tris-Cl pH 8.0
CHEMBL5747401		None	458.5	0	2.1	BDBM432704	O=C(N[C@@H]1C[C@H]2CC[C@@H](C1)N2S(=O)(=O)c1ccc2[nH]c(=O)oc2c1)c1cc(C2CC2)on1	IC50	'='	1401	nM	5.85		877587	UO_0000065	12.77	0.25	3.75	4.23	0	CHEMBL5734901	SMYD3 Biochemical Assay: The assays were all performed in a buffer consisting of 25 mM Tris-Cl pH 8.0
CHEMBL5859052		None	477.59	0	2	BDBM432712	COCCN(C)c1ccc(S(=O)(=O)N2CC[C@H](NC(=O)c3cc(C4CC4)on3)C[C@@H]2C)cn1	IC50	'='	2123	nM	5.67		877595	UO_0000065	11.88	0.23	3.67	4.81	0	CHEMBL5734901	SMYD3 Biochemical Assay: The assays were all performed in a buffer consisting of 25 mM Tris-Cl pH 8.0
CHEMBL6001726		None	386.5	0	2.32	BDBM432492	N[C@H]1CC[C@H](C(=O)N2C3CCC2CC(NC(=O)c2cc(C4CC4)on2)C3)CC1	IC50	'>'	10000	nM			877375	UO_0000065					0	CHEMBL5734901	SMYD3 Biochemical Assay: The assays were all performed in a buffer consisting of 25 mM Tris-Cl pH 8.0
CHEMBL5978807		None	437.57	0	1.16	BDBM433245	CC1CN(C)CCN1S(=O)(=O)N1[C@@H]2CC[C@H]1C[C@@H](NC(=O)c1cc(C3CC3)on1)C2	IC50	'='	52.9	nM	7.28		878128	UO_0000065	16.63	0.33	6.12	7.35	0	CHEMBL5734901	SMYD3 Biochemical Assay: The assays were all performed in a buffer consisting of 25 mM Tris-Cl pH 8.0
CHEMBL5798480		None	484.62	0	3.26	BDBM433248	O=C(N[C@H]1C[C@H]2CC[C@@H](C1)N2S(=O)(=O)c1ccc(CN2CCCC2)cc1)c1cc(C2CC2)on1	IC50	'='	57	nM	7.24		878131	UO_0000065	14.95	0.29	3.98	7.57	0	CHEMBL5734901	SMYD3 Biochemical Assay: The assays were all performed in a buffer consisting of 25 mM Tris-Cl pH 8.0
CHEMBL5800944		None	444.56	0	2.17	BDBM433254	NCCc1ccc(S(=O)(=O)N2[C@@H]3CC[C@H]2C[C@@H](NC(=O)c2cc(C4CC4)on2)C3)cc1	IC50	'='	79.7	nM	7.1		878137	UO_0000065	15.97	0.31	4.93	5.99	0	CHEMBL5734901	SMYD3 Biochemical Assay: The assays were all performed in a buffer consisting of 25 mM Tris-Cl pH 8.0
CHEMBL6063309		None	396.51	0	1.22	BDBM433208	C[C@H]1C[C@@H](NC(=O)c2cc(C3CC3)on2)CCN1S(=O)(=O)[C@H]1CCCNC1	IC50	'='	21.6	nM	7.67		878091	UO_0000065	19.33	0.39	6.45	7.33	0	CHEMBL5734901	SMYD3 Biochemical Assay: The assays were all performed in a buffer consisting of 25 mM Tris-Cl pH 8.0
CHEMBL5952237		None	545.63	1	3.01	BDBM433209	O=C(N[C@H]1C[C@H]2CC[C@@H](C1)N2S(=O)(=O)N1CC2CCC(C1)N2CCCC(F)(F)F)c1cc(C2CC2)on1	IC50	'='	22.9	nM	7.64		878092	UO_0000065	14	0.28	4.63	7.72	0	CHEMBL5734901	SMYD3 Biochemical Assay: The assays were all performed in a buffer consisting of 25 mM Tris-Cl pH 8.0
CHEMBL5849181		None	535.71	1	1.84	BDBM433215	O=C(N[C@H]1C[C@H]2CC[C@@H](C1)N2S(=O)(=O)[C@H]1CC[C@@H](NCCN2CCOCC2)CC1)c1cc(C2CC2)on1	IC50	'='	26.6	nM	7.58		878098	UO_0000065	14.14	0.28	5.74	6.47	0	CHEMBL5734901	SMYD3 Biochemical Assay: The assays were all performed in a buffer consisting of 25 mM Tris-Cl pH 8.0
CHEMBL5765927		None	495.65	0	0.61	BDBM433216	CN(CCO)C1CCN(CCS(=O)(=O)N2[C@@H]3CC[C@H]2C[C@@H](NC(=O)c2cc(C4CC4)on2)C3)C1	IC50	'='	27.7	nM	7.56		878099	UO_0000065	15.25	0.3	6.95	6.34	0	CHEMBL5734901	SMYD3 Biochemical Assay: The assays were all performed in a buffer consisting of 25 mM Tris-Cl pH 8.0
CHEMBL5749001		None	233.31	0	1.39	BDBM378263	Cc1cc(C(=O)N[C@H]2CC[C@H](N)CC2)ccn1	IC50	'>'	100000	nM			756269	UO_0000065					0	CHEMBL5733491	SMYD3 Biochemical Assay: The assays were all performed in a buffer consisting of 25 mM Tris-Cl pH 8.0
CHEMBL5774361		None	310.42	0	0.96	BDBM378266	Cc1cnc(C(=O)N[C@H]2CC[C@H](NC(=O)CCN)CC2)s1	IC50	'='	27420	nM	4.56		756272	UO_0000065	14.7	0.3	3.6	4.7	0	CHEMBL5733491	SMYD3 Biochemical Assay: The assays were all performed in a buffer consisting of 25 mM Tris-Cl pH 8.0
CHEMBL6006777		None	436.58	0	2.09	BDBM432986	CC1CCCN1CCS(=O)(=O)N1[C@@H]2CC[C@H]1C[C@@H](NC(=O)c1cc(C3CC3)on1)C2	IC50	'='	131	nM	6.88		877869	UO_0000065	15.77	0.31	4.79	7.19	0	CHEMBL5734901	SMYD3 Biochemical Assay: The assays were all performed in a buffer consisting of 25 mM Tris-Cl pH 8.0
CHEMBL5802043		None	437.57	0	1.2	BDBM432989	CC1CN(S(=O)(=O)N2[C@@H]3CC[C@H]2C[C@@H](NC(=O)c2cc(C4CC4)on2)C3)CC(C)N1	IC50	'='	148	nM	6.83		877872	UO_0000065	15.61	0.31	5.63	6.34	0	CHEMBL5734901	SMYD3 Biochemical Assay: The assays were all performed in a buffer consisting of 25 mM Tris-Cl pH 8.0
CHEMBL6001561		None	382.49	0	0.96	BDBM432784	NCCCS(=O)(=O)N1[C@@H]2CC[C@H]1C[C@H](NC(=O)c1cc(C3CC3)on1)C2	IC50	'='	79.2	nM	7.1		877667	UO_0000065	18.57	0.37	6.14	5.99	0	CHEMBL5734901	SMYD3 Biochemical Assay: The assays were all performed in a buffer consisting of 25 mM Tris-Cl pH 8.0
CHEMBL5999112		None	423.54	0	0.77	BDBM432889	C[C@H]1C[C@@H](NC(=O)c2cc(C3CC3)on2)CCN1S(=O)(=O)N1C[C@@H]2C[C@H]1CN2C	IC50	'='	11.6	nM	7.94		877772	UO_0000065	18.74	0.37	7.17	8.02	0	CHEMBL5734901	SMYD3 Biochemical Assay: The assays were all performed in a buffer consisting of 25 mM Tris-Cl pH 8.0
CHEMBL5930066		None	410.54	0	1.56	BDBM432890	CN(C)CCCS(=O)(=O)N1[C@@H]2CC[C@H]1C[C@@H](NC(=O)c1cc(C3CC3)on1)C2	IC50	'='	11.8	nM	7.93		877773	UO_0000065	19.31	0.39	6.37	8.28	0	CHEMBL5734901	SMYD3 Biochemical Assay: The assays were all performed in a buffer consisting of 25 mM Tris-Cl pH 8.0
CHEMBL5875449		None	425.56	0	0.5	BDBM432895	CN(CCN)CCS(=O)(=O)N1[C@@H]2CC[C@H]1C[C@@H](NC(=O)c1cc(C3CC3)on1)C2	IC50	'='	13.1	nM	7.88		877778	UO_0000065	18.52	0.37	7.38	6.47	0	CHEMBL5734901	SMYD3 Biochemical Assay: The assays were all performed in a buffer consisting of 25 mM Tris-Cl pH 8.0
CHEMBL5743240		None	453.61	0	1.1	BDBM432900	CN(C)CCN(C)CCS(=O)(=O)N1[C@@H]2CC[C@H]1C[C@@H](NC(=O)c1cc(C3CC3)on1)C2	IC50	'='	14.7	nM	7.83		877783	UO_0000065	17.27	0.35	6.73	7.91	0	CHEMBL5734901	SMYD3 Biochemical Assay: The assays were all performed in a buffer consisting of 25 mM Tris-Cl pH 8.0
CHEMBL5900905		None	397.5	0	0.14	BDBM432918	C[C@H]1CN(S(=O)(=O)N2CCNCC2)CC[C@H]1NC(=O)c1cc(C2CC2)on1	IC50	'='	23.4	nM	7.63		877801	UO_0000065	19.2	0.39	7.49	7.08	0	CHEMBL5734901	SMYD3 Biochemical Assay: The assays were all performed in a buffer consisting of 25 mM Tris-Cl pH 8.0
CHEMBL5991278		None	346.43	0	1.45	BDBM293334	NC1CCC1C(=O)N[C@H]1CC[C@H](NC(=O)c2cc(C3CC3)on2)CC1	IC50	'='	545	nM	6.26		559156	UO_0000065	18.08	0.34	4.81	5.68	0	CHEMBL5731515	SMYD3 Biochemical Assay: S-adenosylmethionine (SAM)
CHEMBL5911240		None	378.47	0	1.15	BDBM293372	NCCCN(C(=O)CCO)[C@H]1CC[C@H](NC(=O)c2cc(C3CC3)on2)CC1	IC50	'='	7028	nM	5.15		559189	UO_0000065	13.62	0.26	4	4.23	0	CHEMBL5731515	SMYD3 Biochemical Assay: S-adenosylmethionine (SAM)
CHEMBL6051932		None	312.41	0	-1.2	BDBM378302	CC(NC(=O)[C@H]1C[C@H](O)CN1)C1CCN(C(=O)[C@H](C)N)CC1	IC50	'='	45650	nM	4.34		756308	UO_0000065	13.89	0.27	5.54	4.03	0	CHEMBL5733491	SMYD3 Biochemical Assay: The assays were all performed in a buffer consisting of 25 mM Tris-Cl pH 8.0
CHEMBL5853130		None	374.49	0	2.23	BDBM293344	N[C@H]1CC[C@@H](C(=O)N[C@H]2CC[C@H](NC(=O)c3cc(C4CC4)on3)CC2)CC1	IC50	'='	352	nM	6.45		559166	UO_0000065	17.23	0.33	4.22	5.85	0	CHEMBL5731515	SMYD3 Biochemical Assay: S-adenosylmethionine (SAM)
CHEMBL5741561		None	360.46	0	1.84	BDBM293356	N[C@@H]1CC[C@H](C(=O)N[C@H]2CC[C@H](NC(=O)c3cc(C4CC4)on3)CC2)C1	IC50	'='	511	nM	6.29		559174	UO_0000065	17.45	0.33	4.45	5.71	0	CHEMBL5731515	SMYD3 Biochemical Assay: S-adenosylmethionine (SAM)
CHEMBL5665365		None	413.52	0	2.17	Compound 18	C[C@H]1CC(=O)Nc2cc(C(=O)NCCC3CC3)ccc2N1C(=O)N1CCCNCC1	IC50	'='	54.2	nM	7.27			UO_0000065	17.57	0.33	5.1	7.75	0	CHEMBL5665262	Binding affinity to recombinant human SMYD3 expressed in Escherichia coli assessed as catalytic inhibition using DYDNPIFEKFGKGGTYPRRYHVSYHGK-Biotin as substrate by scintillation proximity assay	B	BAO_0000019	assay format	Homo sapiens	None	None	None	None	EFO_ID: MONDO:0004992 | EFO_TERM: cancer			CHEMBL2321643	Histone-lysine N-methyltransferase SMYD3	Homo sapiens	SINGLE PROTEIN	CHEMBL5661986	72	Chemical Probe data from Scientific Literature	SLAS Discov	2021	None		INHIBITOR		5.42
CHEMBL5665397		None	396.49	0	2.83	Compound 32	C[C@@H]1CC(=O)Nc2cc(C(=O)NCCC3CC3)ccc2N1C(=O)N1CC2CC2C1	IC50	'='	2530	nM	5.6			UO_0000065	14.12	0.26	2.77	6.85	0	CHEMBL5665262	Binding affinity to recombinant human SMYD3 expressed in Escherichia coli assessed as catalytic inhibition using DYDNPIFEKFGKGGTYPRRYHVSYHGK-Biotin as substrate by scintillation proximity assay	B	BAO_0000019	assay format	Homo sapiens	None	None	None	None	EFO_ID: MONDO:0004992 | EFO_TERM: cancer			CHEMBL2321643	Histone-lysine N-methyltransferase SMYD3	Homo sapiens	SINGLE PROTEIN	CHEMBL5661986	72	Chemical Probe data from Scientific Literature	SLAS Discov	2021	None		INHIBITOR		2.53
CHEMBL5402316		None	390.19	0	3.23	Z795161988	O=C(COC(=O)c1cc(-c2ccoc2)n[nH]1)Nc1ccc(Br)cc1	IC50	'='	8000	nM	5.1			UO_0000065	13.06	0.29	1.87	5.24	0	CHEMBL5344242	Inhibition of human SMYD3 using biotin-tagged MAP3K2 and 3H-SAM as substrate incubated for 1 hrs by TopCount scintillation proximity assay	B	BAO_0000357	single protein format	Homo sapiens	None	None	None	None				CHEMBL2321643	Histone-lysine N-methyltransferase SMYD3	Homo sapiens	SINGLE PROTEIN	CHEMBL5338825	1	Scientific Literature	J Med Chem	2023	None	TIME = 1.0 hr	INHIBITOR		8
CHEMBL5830650		None	391.82	0	2.86	BDBM378308	NCCC(=O)N[C@H]1CC[C@H](NC(=O)c2ccc(Cl)cc2C(F)(F)F)CC1	IC50	'>'	100000	nM			756314	UO_0000065					0	CHEMBL5733491	SMYD3 Biochemical Assay: The assays were all performed in a buffer consisting of 25 mM Tris-Cl pH 8.0
CHEMBL5952778		None	344.42	0	0.43	BDBM378314	CC(NC(=O)c1cn2ncccc2n1)C1CCN(C(=O)[C@H](C)N)CC1	IC50	'>'	100000	nM			756320	UO_0000065					0	CHEMBL5733491	SMYD3 Biochemical Assay: The assays were all performed in a buffer consisting of 25 mM Tris-Cl pH 8.0
CHEMBL5998688		None	330.39	0	0.24	BDBM378315	NCCC(=O)N[C@H]1CC[C@H](NC(=O)c2cn3ncccc3n2)CC1	IC50	'>'	100000	nM			756321	UO_0000065					0	CHEMBL5733491	SMYD3 Biochemical Assay: The assays were all performed in a buffer consisting of 25 mM Tris-Cl pH 8.0
CHEMBL6004277		None	304.39	0	0.9	BDBM378250	Cc1ccncc1C(=O)N[C@H]1CC[C@H](NC(=O)CCN)CC1	IC50	'>'	100000	nM			756256	UO_0000065					0	CHEMBL5733491	SMYD3 Biochemical Assay: The assays were all performed in a buffer consisting of 25 mM Tris-Cl pH 8.0
CHEMBL5938605		None	304.39	0	0.9	BDBM378251	Cc1ccc(C(=O)N[C@H]2CC[C@H](NC(=O)CCN)CC2)cn1	IC50	'>'	100000	nM			756257	UO_0000065					0	CHEMBL5733491	SMYD3 Biochemical Assay: The assays were all performed in a buffer consisting of 25 mM Tris-Cl pH 8.0
CHEMBL5941705		None	334.42	0	0.48	BDBM378406	N[C@H]1CC[C@H](C(=O)N[C@H]2CC[C@H](NC(=O)c3ncn[nH]3)CC2)CC1	IC50	'>'	50000	nM			756412	UO_0000065					0	CHEMBL5733491	SMYD3 Biochemical Assay: The assays were all performed in a buffer consisting of 25 mM Tris-Cl pH 8.0
CHEMBL5805725		None	243.7	0	0.46	BDBM378408	N[C@H]1CC[C@H](NC(=O)c2n[nH]c(Cl)n2)CC1	IC50	'>'	50000	nM			756414	UO_0000065					0	CHEMBL5733491	SMYD3 Biochemical Assay: The assays were all performed in a buffer consisting of 25 mM Tris-Cl pH 8.0
CHEMBL5885150		None	222.29	0	0.72	BDBM378429	Cc1c[nH]c(C(=O)N[C@H]2CC[C@H](N)CC2)n1	IC50	'>'	10000	nM			756435	UO_0000065					0	CHEMBL5733491	SMYD3 Biochemical Assay: The assays were all performed in a buffer consisting of 25 mM Tris-Cl pH 8.0
CHEMBL3798134		None	465.55	0	0.71	BDBM378443	NC1CCN(S(=O)(=O)N2[C@@H]3CC[C@H]2C[C@@H](NC(=O)c2cc4c(cc2F)NC(=O)C4)C3)CC1	IC50	'='	0.49	nM	9.31		756449	UO_0000065	20	0.4	8.6	7.46	0	CHEMBL5733491	SMYD3 Biochemical Assay: The assays were all performed in a buffer consisting of 25 mM Tris-Cl pH 8.0
CHEMBL6012342		None	504.65	1	1.33	BDBM378448	O=C1Cc2cc(C(=O)N[C@H]3C[C@H]4CC[C@@H](C3)N4S(=O)(=O)CC3CCN(CCCO)CC3)ccc2N1	IC50	'='	0.95	nM	9.02		756454	UO_0000065	17.88	0.35	7.69	7.58	0	CHEMBL5733491	SMYD3 Biochemical Assay: The assays were all performed in a buffer consisting of 25 mM Tris-Cl pH 8.0
CHEMBL5829268		None	375.47	0	0.57	BDBM432392	C[C@H]1CC(NC(=O)c2cc(C3CC3)on2)CCN1C(=O)CN1CCNCC1	IC50	'='	3913	nM	5.41		877275	UO_0000065	14.4	0.27	4.84	5.96	0	CHEMBL5734901	SMYD3 Biochemical Assay: The assays were all performed in a buffer consisting of 25 mM Tris-Cl pH 8.0
CHEMBL6031574		None	360.46	0	1.79	BDBM432396	C[C@@H]1CC(NC(=O)c2cc(C3CC3)on2)CCN1C(=O)[C@@H]1CC[C@@H](N)C1	IC50	'='	532	nM	6.27		877279	UO_0000065	17.41	0.33	4.48	6.18	0	CHEMBL5734901	SMYD3 Biochemical Assay: The assays were all performed in a buffer consisting of 25 mM Tris-Cl pH 8.0
CHEMBL5856258		None	395.4	0	2.03	BDBM432487	C[C@@H]1C[C@@H](NC(=O)c2cc(C3CC3)on2)CCN1S(=O)(=O)CC(F)(F)F	IC50	'>'	10000	nM			877370	UO_0000065					0	CHEMBL5734901	SMYD3 Biochemical Assay: The assays were all performed in a buffer consisting of 25 mM Tris-Cl pH 8.0
CHEMBL5788417		None	550.73	1	1.25	BDBM433268	CN(CCN1CCOCC1)C1CCN(S(=O)(=O)N2[C@@H]3CC[C@H]2C[C@@H](NC(=O)c2cc(C4CC4)on2)C3)CC1	IC50	'='	95.3	nM	7.02		878151	UO_0000065	12.75	0.25	5.77	6.3	0	CHEMBL5734901	SMYD3 Biochemical Assay: The assays were all performed in a buffer consisting of 25 mM Tris-Cl pH 8.0
CHEMBL5938787		None	422.55	0	1.7	BDBM433274	CN1CCC[C@H]1CS(=O)(=O)N1[C@@H]2CC[C@H]1C[C@@H](NC(=O)c1cc(C3CC3)on1)C2	IC50	'='	119	nM	6.92		878157	UO_0000065	16.39	0.33	5.22	7.23	0	CHEMBL5734901	SMYD3 Biochemical Assay: The assays were all performed in a buffer consisting of 25 mM Tris-Cl pH 8.0
CHEMBL5860431		None	452.58	0	1.06	BDBM433276	O=C(N[C@H]1C[C@H]2CC[C@@H](C1)N2S(=O)(=O)[C@@H]1CCCN(CCO)C1)c1cc(C2CC2)on1	IC50	'='	127	nM	6.9		878159	UO_0000065	15.24	0.3	5.84	5.95	0	CHEMBL5734901	SMYD3 Biochemical Assay: The assays were all performed in a buffer consisting of 25 mM Tris-Cl pH 8.0
CHEMBL5812793		None	273.34	0	0.91	BDBM377971	O=C1Cc2cc(C(=O)NCC3CCNCC3)ccc2N1	IC50	'='	20040	nM	4.7		755980	UO_0000065	17.19	0.32	3.79	6.69	0	CHEMBL5733491	SMYD3 Biochemical Assay: The assays were all performed in a buffer consisting of 25 mM Tris-Cl pH 8.0
CHEMBL5962623		None	318.38	0	0.15	BDBM377979	C[C@H](N)C(=O)NCCCCNC(=O)c1ccc2c(c1)CC(=O)N2	IC50	'='	13950	nM	4.86		755987	UO_0000065	15.25	0.29	4.71	4.28	0	CHEMBL5733491	SMYD3 Biochemical Assay: The assays were all performed in a buffer consisting of 25 mM Tris-Cl pH 8.0
CHEMBL5741475		None	237.3	0	1.24	BDBM377883	CCc1cc(C(=O)N[C@H]2CC[C@H](N)CC2)on1	IC50	'='	104430	nM		Outside typical range	755895	UO_0000065					0	CHEMBL5733491	SMYD3 Biochemical Assay: The assays were all performed in a buffer consisting of 25 mM Tris-Cl pH 8.0
CHEMBL5971233		None	300.36	0	1.73	BDBM377951	Nc1nc(C(=O)NC(c2ccccc2)C2CCNCC2)co1	IC50	'='	97110	nM	4.01		755960	UO_0000065	13.36	0.25	2.28	4.31	0	CHEMBL5733491	SMYD3 Biochemical Assay: The assays were all performed in a buffer consisting of 25 mM Tris-Cl pH 8.0
CHEMBL5998086		None	459.55	0	1.98	BDBM377954	CN1C(=O)Cc2cc(C(=O)NC3CCN(C(=O)[C@@H](N)Cc4c[nH]c5ccccc45)CC3)ccc21	IC50	'='	12940	nM	4.89		755963	UO_0000065	10.64	0.2	2.91	4.38	0	CHEMBL5733491	SMYD3 Biochemical Assay: The assays were all performed in a buffer consisting of 25 mM Tris-Cl pH 8.0
CHEMBL5998518		None	289.33	0	0.03	BDBM377977	O=C1Cc2cc(C(=O)NCC3(O)CCNCC3)ccc2N1	IC50	'='	40390	nM	4.39		755985	UO_0000065	15.19	0.29	4.36	4.86	0	CHEMBL5733491	SMYD3 Biochemical Assay: The assays were all performed in a buffer consisting of 25 mM Tris-Cl pH 8.0
CHEMBL5787605		None	382.49	0	1.48	BDBM432588	C[C@H]1C[C@H](NC(=O)c2cc(C3CC3)on2)CCN1S(=O)(=O)N1CCCC1	IC50	'>'	10000	nM			877471	UO_0000065					0	CHEMBL5734901	SMYD3 Biochemical Assay: The assays were all performed in a buffer consisting of 25 mM Tris-Cl pH 8.0
CHEMBL5939956		None	348.45	0	1.65	BDBM432597	CC[C@@H]1CN(C(=O)CCCN)CC[C@@H]1NC(=O)c1cc(C2CC2)on1	IC50	'='	1805	nM	5.74		877480	UO_0000065	16.48	0.31	4.09	5.66	0	CHEMBL5734901	SMYD3 Biochemical Assay: The assays were all performed in a buffer consisting of 25 mM Tris-Cl pH 8.0
CHEMBL5963435		None	370.48	0	0.81	BDBM432488	C[C@H]1C[C@@H](NC(=O)c2cc(C3CC3)on2)CCN1S(=O)(=O)CCCN	IC50	'='	4.09	nM	8.39		877371	UO_0000065	22.64	0.46	7.58	7.08	0	CHEMBL5734901	SMYD3 Biochemical Assay: The assays were all performed in a buffer consisting of 25 mM Tris-Cl pH 8.0
CHEMBL5952018		None	335.41	0	0.19	BDBM378132	COc1cncc(C(=O)NC(C)C2CCN(C(=O)[C@H](C)N)CC2)n1	IC50	'>'	100000	nM			756138	UO_0000065					0	CHEMBL5733491	SMYD3 Biochemical Assay: The assays were all performed in a buffer consisting of 25 mM Tris-Cl pH 8.0
CHEMBL5955680		None	322.38	0	0.92	BDBM378138	CC(NC(=O)c1ccncc1F)C1CCN(C(=O)[C@H](C)N)CC1	IC50	'>'	100000	nM			756144	UO_0000065					0	CHEMBL5733491	SMYD3 Biochemical Assay: The assays were all performed in a buffer consisting of 25 mM Tris-Cl pH 8.0
CHEMBL5885575		None	424.57	0	1.85	BDBM433098	CNC1CCC(CS(=O)(=O)N2CC[C@H](NC(=O)c3cc(C4CC4)on3)C[C@@H]2C)C1	IC50	'='	2.3	nM	8.64		877981	UO_0000065	20.35	0.41	6.79	8.26	0	CHEMBL5734901	SMYD3 Biochemical Assay: The assays were all performed in a buffer consisting of 25 mM Tris-Cl pH 8.0
CHEMBL6060517		None	455.58	0	0.43	BDBM433104	C[C@H]1C[C@@H](NC(=O)c2cc(C3CC3)on2)CCN1S(=O)(=O)N1CCC(NCCO)CC1	IC50	'='	2.47	nM	8.61		877987	UO_0000065	18.89	0.38	8.18	6.72	0	CHEMBL5734901	SMYD3 Biochemical Assay: The assays were all performed in a buffer consisting of 25 mM Tris-Cl pH 8.0
CHEMBL5862145		None	437.57	0	1.19	BDBM433126	NCC1CCN(S(=O)(=O)N2[C@@H]3CC[C@H]2C[C@@H](NC(=O)c2cc(C4CC4)on2)C3)CC1	IC50	'='	4.34	nM	8.36		878009	UO_0000065	19.11	0.38	7.17	6.87	0	CHEMBL5734901	SMYD3 Biochemical Assay: The assays were all performed in a buffer consisting of 25 mM Tris-Cl pH 8.0
CHEMBL5851963		None	463.6	0	1.74	BDBM433131	O=C(N[C@H]1C[C@H]2CC[C@@H](C1)N2S(=O)(=O)N1CCC2(CCCN2)CC1)c1cc(C2CC2)on1	IC50	'='	4.63	nM	8.33		878014	UO_0000065	17.98	0.36	6.59	7.73	0	CHEMBL5734901	SMYD3 Biochemical Assay: The assays were all performed in a buffer consisting of 25 mM Tris-Cl pH 8.0
CHEMBL5956016		None	382.49	0	0.96	BDBM432785	NCCCS(=O)(=O)N1[C@@H]2CC[C@H]1C[C@@H](NC(=O)c1cc(C3CC3)on1)C2	IC50	'='	5.07	nM	8.29		877668	UO_0000065	21.69	0.44	7.33	7	0	CHEMBL5734901	SMYD3 Biochemical Assay: The assays were all performed in a buffer consisting of 25 mM Tris-Cl pH 8.0
CHEMBL5952603		None	421.52	0	0.57	BDBM432868	O=C(N[C@H]1C[C@H]2CC[C@@H](C1)N2S(=O)(=O)N1CC2CC(C1)N2)c1cc(C2CC2)on1	IC50	'='	7.5	nM	8.12		877751	UO_0000065	19.28	0.38	7.55	7.54	0	CHEMBL5734901	SMYD3 Biochemical Assay: The assays were all performed in a buffer consisting of 25 mM Tris-Cl pH 8.0
CHEMBL5877644		None	388.51	0	3.71	BDBM377901	Cc1cc(C(=O)NC(c2ccccc2)C2CCNCC2)n(Cc2ccccc2)n1	IC50	'='	91270	nM	4.04		755913	UO_0000065	10.4	0.19	0.33	6.85	0	CHEMBL5733491	SMYD3 Biochemical Assay: The assays were all performed in a buffer consisting of 25 mM Tris-Cl pH 8.0
CHEMBL5866007		None	371.44	0	1.5	BDBM378096	CC(NC(=O)c1cc(=O)c2ccccc2o1)C1CCN(C(=O)[C@H](C)N)CC1	IC50	'>'	100000	nM			756102	UO_0000065					0	CHEMBL5733491	SMYD3 Biochemical Assay: The assays were all performed in a buffer consisting of 25 mM Tris-Cl pH 8.0
CHEMBL5868344		None	360.48	0	2	BDBM378100	CC(NC(=O)c1ccc2ncsc2c1)C1CCN(C(=O)[C@H](C)N)CC1	IC50	'>'	100000	nM			756106	UO_0000065					0	CHEMBL5733491	SMYD3 Biochemical Assay: The assays were all performed in a buffer consisting of 25 mM Tris-Cl pH 8.0
CHEMBL5750715		None	355.44	0	1.33	BDBM378110	CC(NC(=O)c1cnc2ccccc2n1)C1CCN(C(=O)[C@H](C)N)CC1	IC50	'>'	100000	nM			756116	UO_0000065					0	CHEMBL5733491	SMYD3 Biochemical Assay: The assays were all performed in a buffer consisting of 25 mM Tris-Cl pH 8.0
CHEMBL5863555		None	236.32	0	1.03	BDBM378054	Cc1n[nH]c(C)c1C(=O)N[C@H]1CC[C@H](N)CC1	IC50	'>'	100000	nM			756060	UO_0000065					0	CHEMBL5733491	SMYD3 Biochemical Assay: The assays were all performed in a buffer consisting of 25 mM Tris-Cl pH 8.0
CHEMBL6052443		None	383.4	0	1.71	BDBM378137	CC(NC(=O)c1cccc2c1OC(F)(F)O2)C1CCN(C(=O)[C@H](C)N)CC1	IC50	'>'	100000	nM			756143	UO_0000065					0	CHEMBL5733491	SMYD3 Biochemical Assay: The assays were all performed in a buffer consisting of 25 mM Tris-Cl pH 8.0
CHEMBL5955332		None	328.42	0	1.67	BDBM378143	NCCC(=O)N[C@H]1CC[C@H](NC(=O)c2ccc3cc[nH]c3c2)CC1	IC50	'='	37250	nM	4.43		756149	UO_0000065	13.49	0.25	2.76	4.43	0	CHEMBL5733491	SMYD3 Biochemical Assay: The assays were all performed in a buffer consisting of 25 mM Tris-Cl pH 8.0
CHEMBL5938246		None	435.57	0	4.32	BDBM432390	N[C@H]1CC[C@H](C(=O)C2CCC(NC(=O)c3cc(C4CC4)on3)CC2c2ccccc2)CC1	IC50	'='	3386	nM	5.47		877273	UO_0000065	12.56	0.23	1.15	5.57	0	CHEMBL5734901	SMYD3 Biochemical Assay: The assays were all performed in a buffer consisting of 25 mM Tris-Cl pH 8.0
CHEMBL5892641		None	388.51	0	2.44	BDBM432391	CN[C@H]1CC[C@H](C(=O)N2CCC(NC(=O)c3cc(C4CC4)on3)C[C@@H]2C)CC1	IC50	'='	5330	nM	5.27		877274	UO_0000065	13.57	0.26	2.83	6.03	0	CHEMBL5734901	SMYD3 Biochemical Assay: The assays were all performed in a buffer consisting of 25 mM Tris-Cl pH 8.0
CHEMBL5939226		None	285.35	0	1.27	BDBM378149	N[C@H]1CC[C@H](NC(=O)c2ccc(-n3cnnc3)cc2)CC1	IC50	'>'	100000	nM			756155	UO_0000065					0	CHEMBL5733491	SMYD3 Biochemical Assay: The assays were all performed in a buffer consisting of 25 mM Tris-Cl pH 8.0
CHEMBL5816491		None	358.49	0	1.79	BDBM378150	NCCC(=O)N[C@H]1CC[C@H](NC(=O)c2ccc(N3CCCC3)cc2)CC1	IC50	'='	43650	nM	4.36		756156	UO_0000065	12.16	0.23	2.57	4.99	0	CHEMBL5733491	SMYD3 Biochemical Assay: The assays were all performed in a buffer consisting of 25 mM Tris-Cl pH 8.0
CHEMBL5845179		None	260.3	0	1.22	BDBM378157	N[C@H]1CC[C@H](NC(=O)c2ccc3nonc3c2)CC1	IC50	'>'	100000	nM			756163	UO_0000065					0	CHEMBL5733491	SMYD3 Biochemical Assay: The assays were all performed in a buffer consisting of 25 mM Tris-Cl pH 8.0
CHEMBL5838928		None	224.35	0	1.81	BDBM377932	CC(CC(=O)N[C@H]1CC[C@H](N)CC1)C1CC1	IC50	'='	155290	nM		Outside typical range	755942	UO_0000065					0	CHEMBL5733491	SMYD3 Biochemical Assay: The assays were all performed in a buffer consisting of 25 mM Tris-Cl pH 8.0
CHEMBL5830727		None	357.5	0	2.27	BDBM378074	CC(NC(=O)c1ccc2c(c1)CCCC2)C1CCN(C(=O)[C@H](C)N)CC1	IC50	'='	59000	nM	4.23		756080	UO_0000065	11.83	0.22	1.96	5.61	0	CHEMBL5733491	SMYD3 Biochemical Assay: The assays were all performed in a buffer consisting of 25 mM Tris-Cl pH 8.0
CHEMBL5748707		None	306.37	0	2.89	BDBM377905	Cc1cc(C(=O)Nc2ccc(CN)cc2)n(-c2ccccc2)n1	IC50	'='	123930	nM		Outside typical range	755917	UO_0000065					0	CHEMBL5733491	SMYD3 Biochemical Assay: The assays were all performed in a buffer consisting of 25 mM Tris-Cl pH 8.0
CHEMBL5989895		None	273.34	0	1.18	BDBM377909	N[C@H]1CC[C@H](NC(=O)c2ccc3c(c2)CC(=O)N3)CC1	IC50	'='	3310	nM	5.48		755922	UO_0000065	20.05	0.37	4.3	6.51	0	CHEMBL5733491	SMYD3 Biochemical Assay: The assays were all performed in a buffer consisting of 25 mM Tris-Cl pH 8.0
CHEMBL5851455		None	238.38	0	2.2	BDBM377923	CCCCC1CC1C(=O)N[C@H]1CC[C@H](N)CC1	IC50	'='	121580	nM		Outside typical range	755933	UO_0000065					0	CHEMBL5733491	SMYD3 Biochemical Assay: The assays were all performed in a buffer consisting of 25 mM Tris-Cl pH 8.0
CHEMBL6041678		None	253.37	0	1.71	BDBM377929	CCc1ncc(C(=O)N[C@H]2CC[C@H](N)CC2)s1	IC50	'='	184110	nM		Outside typical range	755939	UO_0000065					0	CHEMBL5733491	SMYD3 Biochemical Assay: The assays were all performed in a buffer consisting of 25 mM Tris-Cl pH 8.0
CHEMBL5856079		None	347.42	0	1.12	BDBM378018	CC(NC(=O)c1ccc2c(c1)OCO2)C1CCN(C(=O)[C@H](C)N)CC1	IC50	'>'	100000	nM			756024	UO_0000065					0	CHEMBL5733491	SMYD3 Biochemical Assay: The assays were all performed in a buffer consisting of 25 mM Tris-Cl pH 8.0
CHEMBL5879523		None	381.5	0	0.79	BDBM378021	CC(NC(=O)c1cccc(S(C)(=O)=O)c1)C1CCN(C(=O)[C@H](C)N)CC1	IC50	'>'	100000	nM			756027	UO_0000065					0	CHEMBL5733491	SMYD3 Biochemical Assay: The assays were all performed in a buffer consisting of 25 mM Tris-Cl pH 8.0
CHEMBL5772837		None	354.45	0	1.94	BDBM378034	CC(NC(=O)c1ccc2ccccc2n1)C1CCN(C(=O)[C@H](C)N)CC1	IC50	'>'	100000	nM			756040	UO_0000065					0	CHEMBL5733491	SMYD3 Biochemical Assay: The assays were all performed in a buffer consisting of 25 mM Tris-Cl pH 8.0
CHEMBL5979647		None	402.54	0	2.96	BDBM432691	C[C@H]1C[C@@H](NC(=O)c2cc(C3CC3)on2)CCN1C(=O)CC1(CN)CCCCC1	IC50	'='	5723	nM	5.24		877574	UO_0000065	13.02	0.25	2.28	5.17	0	CHEMBL5734901	SMYD3 Biochemical Assay: The assays were all performed in a buffer consisting of 25 mM Tris-Cl pH 8.0
CHEMBL6006577		None	410.52	0	3.17	BDBM432692	C[C@@H]1C[C@@H](NC(=O)c2cc(C3CC3)on2)CCN1C(=O)c1cccc(C(C)(C)N)c1	IC50	'>'	10000	nM			877575	UO_0000065					0	CHEMBL5734901	SMYD3 Biochemical Assay: The assays were all performed in a buffer consisting of 25 mM Tris-Cl pH 8.0
CHEMBL5865694		None	458.5	0	2.1	BDBM432705	O=C(N[C@H]1C[C@H]2CC[C@@H](C1)N2S(=O)(=O)c1ccc2[nH]c(=O)oc2c1)c1cc(C2CC2)on1	IC50	'='	9393	nM	5.03		877588	UO_0000065	10.96	0.21	2.93	3.63	0	CHEMBL5734901	SMYD3 Biochemical Assay: The assays were all performed in a buffer consisting of 25 mM Tris-Cl pH 8.0
CHEMBL5851068		None	461.59	0	2.99	BDBM432753	CC(C)CNc1ccc(S(=O)(=O)N2CC[C@@H](NC(=O)c3cc(C4CC4)on3)C[C@H]2C)cn1	IC50	'='	7193	nM	5.14		877636	UO_0000065	11.14	0.22	2.15	4.38	0	CHEMBL5734901	SMYD3 Biochemical Assay: The assays were all performed in a buffer consisting of 25 mM Tris-Cl pH 8.0
CHEMBL5665403		None	399.5	0	1.78	Compound 17	C[C@H]1CC(=O)Nc2cc(C(=O)NCCC3CC3)ccc2N1C(=O)N1CCNCC1	IC50	'='	252	nM	6.6			UO_0000065	16.52	0.31	4.82	7.04	0	CHEMBL5665262	Binding affinity to recombinant human SMYD3 expressed in Escherichia coli assessed as catalytic inhibition using DYDNPIFEKFGKGGTYPRRYHVSYHGK-Biotin as substrate by scintillation proximity assay	B	BAO_0000019	assay format	Homo sapiens	None	None	None	None	EFO_ID: MONDO:0004992 | EFO_TERM: cancer			CHEMBL2321643	Histone-lysine N-methyltransferase SMYD3	Homo sapiens	SINGLE PROTEIN	CHEMBL5661986	72	Chemical Probe data from Scientific Literature	SLAS Discov	2021	None		INHIBITOR		2.52
CHEMBL5997115		None	473.6	0	1.51	BDBM433261	O=C(N[C@H]1CCN(S(=O)(=O)N2CCNCC2)[C@@H](Cc2ccccc2)C1)c1cc(C2CC2)on1	IC50	'='	86.8	nM	7.06		878144	UO_0000065	14.91	0.29	5.55	6.55	0	CHEMBL5734901	SMYD3 Biochemical Assay: The assays were all performed in a buffer consisting of 25 mM Tris-Cl pH 8.0
CHEMBL5985062		None	464.98	0	2.78	BDBM433263	NCc1ccc(S(=O)(=O)N2[C@@H]3CC[C@H]2C[C@@H](NC(=O)c2cc(C4CC4)on2)C3)c(Cl)c1	IC50	'='	88.3	nM	7.05		878146	UO_0000065	15.17	0.31	4.27	5.95	0	CHEMBL5734901	SMYD3 Biochemical Assay: The assays were all performed in a buffer consisting of 25 mM Tris-Cl pH 8.0
CHEMBL5979672		None	488.61	0	2.4	BDBM433281	COCCNCc1ccc(S(=O)(=O)N2[C@@H]3CC[C@H]2C[C@@H](NC(=O)c2cc(C4CC4)on2)C3)cc1	IC50	'='	156	nM	6.81		878164	UO_0000065	13.93	0.27	4.41	5.98	0	CHEMBL5734901	SMYD3 Biochemical Assay: The assays were all performed in a buffer consisting of 25 mM Tris-Cl pH 8.0
CHEMBL5926298		None	434.56	0	2.4	BDBM433282	CCc1cc(C(=O)N[C@@H]2CCN(S(=O)(=O)c3ccc(C(C)(C)N)cc3)[C@@H](C)C2)no1	IC50	'='	158	nM	6.8		878165	UO_0000065	15.65	0.31	4.4	5.74	0	CHEMBL5734901	SMYD3 Biochemical Assay: The assays were all performed in a buffer consisting of 25 mM Tris-Cl pH 8.0
CHEMBL5876069		None	536.7	1	0.91	BDBM433242	O=C(N[C@H]1C[C@H]2CC[C@@H](C1)N2S(=O)(=O)N1CCC(NCCN2CCOCC2)CC1)c1cc(C2CC2)on1	IC50	'='	52.3	nM	7.28		878125	UO_0000065	13.57	0.27	6.37	6.06	0	CHEMBL5734901	SMYD3 Biochemical Assay: The assays were all performed in a buffer consisting of 25 mM Tris-Cl pH 8.0
CHEMBL5956804		None	356.43	0	1.45	BDBM378273	NCCC(=O)N[C@H]1CC[C@H](NC(=O)c2cc(O)c3ccccc3n2)CC1	IC50	'>'	100000	nM			756279	UO_0000065					0	CHEMBL5733491	SMYD3 Biochemical Assay: The assays were all performed in a buffer consisting of 25 mM Tris-Cl pH 8.0
CHEMBL5740084		None	460.56	0	2.16	BDBM433058	CC(=O)NCc1ccc(S(=O)(=O)N2CC[C@H](NC(=O)c3cc(C4CC4)on3)C[C@@H]2C)cc1	IC50	'='	751	nM	6.12		877941	UO_0000065	13.3	0.26	3.96	5.04	0	CHEMBL5734901	SMYD3 Biochemical Assay: The assays were all performed in a buffer consisting of 25 mM Tris-Cl pH 8.0
CHEMBL6040217		None	452.62	0	2.59	BDBM433073	CCC[C@@H]1C[C@H](NC(=O)c2cc(C3CC3)on2)CCN1S(=O)(=O)CC1CCN(C)CC1	IC50	'='	1.14	nM	8.94		877956	UO_0000065	19.76	0.39	6.35	9.34	0	CHEMBL5734901	SMYD3 Biochemical Assay: The assays were all performed in a buffer consisting of 25 mM Tris-Cl pH 8.0
CHEMBL5874030		None	530.67	1	3.66	BDBM433074	O=C(N[C@H]1C[C@H]2CC[C@@H](C1)N2S(=O)(=O)CC1CCN(Cc2ccc(F)cc2)CC1)c1cc(C2CC2)on1	IC50	'='	1.18	nM	8.93		877957	UO_0000065	16.82	0.33	5.27	9.32	0	CHEMBL5734901	SMYD3 Biochemical Assay: The assays were all performed in a buffer consisting of 25 mM Tris-Cl pH 8.0
CHEMBL6020373		None	464.63	0	2.73	BDBM433077	CCCN1CCC(CS(=O)(=O)N2[C@@H]3CC[C@H]2C[C@@H](NC(=O)c2cc(C4CC4)on2)C3)CC1	IC50	'='	1.22	nM	8.91		877960	UO_0000065	19.18	0.38	6.18	9.31	0	CHEMBL5734901	SMYD3 Biochemical Assay: The assays were all performed in a buffer consisting of 25 mM Tris-Cl pH 8.0
CHEMBL6056942		None	388.51	0	2.43	BDBM432643	C[C@@H]1C[C@@H](NC(=O)c2cc(C3CC3)on2)CCN1C(=O)C1CCCC(CN)C1	IC50	'='	1067	nM	5.97		877526	UO_0000065	15.37	0.29	3.54	5.89	0	CHEMBL5734901	SMYD3 Biochemical Assay: The assays were all performed in a buffer consisting of 25 mM Tris-Cl pH 8.0
CHEMBL5772978		None	356.45	0	0.94	BDBM432646	C[C@H]1C[C@H](NC(=O)c2cc(C3CC3)on2)CCN1S(=O)(=O)N(C)C	IC50	'>'	10000	nM			877529	UO_0000065					0	CHEMBL5734901	SMYD3 Biochemical Assay: The assays were all performed in a buffer consisting of 25 mM Tris-Cl pH 8.0
CHEMBL5849806		None	509.67	1	1.26	BDBM433000	CN(CCCS(=O)(=O)N1[C@@H]2CC[C@H]1C[C@@H](NC(=O)c1cc(C3CC3)on1)C2)CCN1CCOCC1	IC50	'='	217	nM	6.66		877883	UO_0000065	13.07	0.26	5.4	6.16	0	CHEMBL5734901	SMYD3 Biochemical Assay: The assays were all performed in a buffer consisting of 25 mM Tris-Cl pH 8.0
CHEMBL5991156		None	492.94	0	2.75	BDBM432790	O=C(N[C@@H]1C[C@H]2CC[C@@H](C1)N2S(=O)(=O)c1cc2oc(=O)[nH]c2cc1Cl)c1cc(C2CC2)on1	IC50	'>'	10000	nM			877673	UO_0000065					0	CHEMBL5734901	SMYD3 Biochemical Assay: The assays were all performed in a buffer consisting of 25 mM Tris-Cl pH 8.0
CHEMBL5996546		None	516.66	1	2.41	BDBM432795	O=C(N[C@H]1CCN(S(=O)(=O)CCCN2CCOCC2)[C@@H](Cc2ccccc2)C1)c1cc(C2CC2)on1	IC50	'>'	10000	nM			877678	UO_0000065					0	CHEMBL5734901	SMYD3 Biochemical Assay: The assays were all performed in a buffer consisting of 25 mM Tris-Cl pH 8.0
CHEMBL6064272		None	436.58	0	2.09	BDBM432894	O=C(N[C@H]1C[C@H]2CC[C@@H](C1)N2S(=O)(=O)CCCN1CCCC1)c1cc(C2CC2)on1	IC50	'='	12.9	nM	7.89		877777	UO_0000065	18.07	0.36	5.8	8.24	0	CHEMBL5734901	SMYD3 Biochemical Assay: The assays were all performed in a buffer consisting of 25 mM Tris-Cl pH 8.0
CHEMBL5755859		None	466.65	0	3.02	BDBM432909	C[C@H]1C[C@@H](NC(=O)c2cc(C3CC3)on2)CCN1S(=O)(=O)CCCNCC1CCCCC1	IC50	'='	20.7	nM	7.68		877792	UO_0000065	16.47	0.33	4.66	7.35	0	CHEMBL5734901	SMYD3 Biochemical Assay: The assays were all performed in a buffer consisting of 25 mM Tris-Cl pH 8.0
CHEMBL5771558		None	456.52	0	2.16	BDBM432733	O=C1Cc2cc(S(=O)(=O)N3[C@@H]4CC[C@H]3C[C@@H](NC(=O)c3cc(C5CC5)on3)C4)ccc2N1	IC50	'='	4192	nM	5.38		877616	UO_0000065	11.78	0.23	3.22	4.42	0	CHEMBL5734901	SMYD3 Biochemical Assay: The assays were all performed in a buffer consisting of 25 mM Tris-Cl pH 8.0
CHEMBL5985173		None	457.51	0	1.84	BDBM432734	O=C(N[C@H]1C[C@H]2CC[C@@H](C1)N2S(=O)(=O)c1ccc2[nH]c(=O)[nH]c2c1)c1cc(C2CC2)on1	IC50	'='	2408	nM	5.62		877617	UO_0000065	12.28	0.24	3.78	3.98	0	CHEMBL5734901	SMYD3 Biochemical Assay: The assays were all performed in a buffer consisting of 25 mM Tris-Cl pH 8.0
CHEMBL5715928		None	566.54	1	-1.92	EUB0002243aAD	CN(C)CCCN(CC[C@H](N)C(=O)O)C[C@H]1O[C@@H](n2cnc3c(N)ncnc32)[C@H](O)[C@@H]1O.O=C(O)C(F)(F)F	IC50	'='	130	nM	6.89			UO_0000065					0	CHEMBL5723139	Affinity Biochemical interaction: (inhibition of methylation activity
CHEMBL4746525		None	396.49	0	2.83	Chemical probe: BAY-6035; Compound 31	C[C@H]1CC(=O)Nc2cc(C(=O)NCCC3CC3)ccc2N1C(=O)N1CC2CC2C1	IC50	'='	88	nM	7.06			UO_0000065	17.79	0.33	4.23	8.63	0	CHEMBL5665262	Binding affinity to recombinant human SMYD3 expressed in Escherichia coli assessed as catalytic inhibition using DYDNPIFEKFGKGGTYPRRYHVSYHGK-Biotin as substrate by scintillation proximity assay	B	BAO_0000019	assay format	Homo sapiens	None	None	None	None	EFO_ID: MONDO:0004992 | EFO_TERM: cancer			CHEMBL2321643	Histone-lysine N-methyltransferase SMYD3	Homo sapiens	SINGLE PROTEIN	CHEMBL5661986	72	Chemical Probe data from Scientific Literature	SLAS Discov	2021	None		INHIBITOR		8.8
CHEMBL5665383		None	391.47	0	3.59	Compound 13	CC1CC(=O)Nc2cc(C(=O)NCCC3CC3)ccc2N1C(=O)c1ccccc1	IC50	'='	1970	nM	5.71			UO_0000065	14.57	0.27	2.12	7.27	0	CHEMBL5665262	Binding affinity to recombinant human SMYD3 expressed in Escherichia coli assessed as catalytic inhibition using DYDNPIFEKFGKGGTYPRRYHVSYHGK-Biotin as substrate by scintillation proximity assay	B	BAO_0000019	assay format	Homo sapiens	None	None	None	None	EFO_ID: MONDO:0004992 | EFO_TERM: cancer			CHEMBL2321643	Histone-lysine N-methyltransferase SMYD3	Homo sapiens	SINGLE PROTEIN	CHEMBL5661986	72	Chemical Probe data from Scientific Literature	SLAS Discov	2021	None		INHIBITOR		1.97
CHEMBL3798012		None	539.1	1	1.98	9	O=C1Cc2cc(C(=O)N[C@H]3C[C@H]4CC[C@@H](C3)N4S(=O)(=O)CC3CCN(CCCO)CC3)c(Cl)cc2N1	IC50	'='	2	nM	8.7			UO_0000065	16.14	0.33	6.72	7.31	0	CHEMBL3803119	Inhibition of full length N-terminal His-tagged SMYD3 (1 to 428 residues) (unknown origin) expressed in Escherichia coli using N-terminal GST-tagged MEKK2 as substrate preincubated for 30 mins followed by substrate addition by scintillation proximity assay in presence of [3H]SAM	B	BAO_0000019	assay format	Homo sapiens	None	None	None	None				CHEMBL2321643	Histone-lysine N-methyltransferase SMYD3	Homo sapiens	SINGLE PROTEIN	CHEMBL3797202	1	Scientific Literature	ACS Med Chem Lett	2016	None				2
CHEMBL3798006		None	447.56	0	0.57	18	NC1CCN(S(=O)(=O)N2[C@@H]3CC[C@H]2C[C@@H](NC(=O)c2ccc4c(c2)CC(=O)N4)C3)CC1	IC50	'='	1	nM	9			UO_0000065	20.11	0.4	8.43	7.21	0	CHEMBL3803119	Inhibition of full length N-terminal His-tagged SMYD3 (1 to 428 residues) (unknown origin) expressed in Escherichia coli using N-terminal GST-tagged MEKK2 as substrate preincubated for 30 mins followed by substrate addition by scintillation proximity assay in presence of [3H]SAM	B	BAO_0000019	assay format	Homo sapiens	None	None	None	None				CHEMBL2321643	Histone-lysine N-methyltransferase SMYD3	Homo sapiens	SINGLE PROTEIN	CHEMBL3797202	1	Scientific Literature	ACS Med Chem Lett	2016	None				1
CHEMBL3798134		None	465.55	0	0.71	16	NC1CCN(S(=O)(=O)N2[C@@H]3CC[C@H]2C[C@@H](NC(=O)c2cc4c(cc2F)NC(=O)C4)C3)CC1	IC50	'='	5	nM	8.3			UO_0000065	17.83	0.35	7.59	6.65	0	CHEMBL3803119	Inhibition of full length N-terminal His-tagged SMYD3 (1 to 428 residues) (unknown origin) expressed in Escherichia coli using N-terminal GST-tagged MEKK2 as substrate preincubated for 30 mins followed by substrate addition by scintillation proximity assay in presence of [3H]SAM	B	BAO_0000019	assay format	Homo sapiens	None	None	None	None				CHEMBL2321643	Histone-lysine N-methyltransferase SMYD3	Homo sapiens	SINGLE PROTEIN	CHEMBL3797202	1	Scientific Literature	ACS Med Chem Lett	2016	None				5
CHEMBL3798717		None	259.31	0	0.66	1	O=C1Cc2cc(C(=O)NC3CCNCC3)ccc2N1	IC50	'='	17000	nM	4.77			UO_0000065	18.39	0.34	4.11	6.79	0	CHEMBL3803119	Inhibition of full length N-terminal His-tagged SMYD3 (1 to 428 residues) (unknown origin) expressed in Escherichia coli using N-terminal GST-tagged MEKK2 as substrate preincubated for 30 mins followed by substrate addition by scintillation proximity assay in presence of [3H]SAM	B	BAO_0000019	assay format	Homo sapiens	None	None	None	None				CHEMBL2321643	Histone-lysine N-methyltransferase SMYD3	Homo sapiens	SINGLE PROTEIN	CHEMBL3797202	1	Scientific Literature	ACS Med Chem Lett	2016	None				17000
CHEMBL5901256		None	372.47	0	1.88	BDBM378240	COc1cccc2[nH]cc(C(=O)NC(C)C3CCN(C(=O)[C@H](C)N)CC3)c12	IC50	'>'	100000	nM			756246	UO_0000065					0	CHEMBL5733491	SMYD3 Biochemical Assay: The assays were all performed in a buffer consisting of 25 mM Tris-Cl pH 8.0
CHEMBL6036823		None	287.36	0	2.18	BDBM378242	COc1cccc2[nH]cc(C(=O)N[C@H]3CC[C@H](N)CC3)c12	IC50	'>'	100000	nM			756248	UO_0000065					0	CHEMBL5733491	SMYD3 Biochemical Assay: The assays were all performed in a buffer consisting of 25 mM Tris-Cl pH 8.0
CHEMBL4541197		None	429.95	0	4.32	16	CCCOC(=O)N1CCN(C(=O)c2ccc3c(Cl)c4c(nc3c2)CCC(C)C4)CC1	IC50	'='	1300	nM	5.89			UO_0000065	13.69	0.27	1.57	9.38	0	CHEMBL4306860	Inhibition of SMYD3 (unknown origin) using MAP3K2 peptide as substrate pretreated for 30 mins followed by substrate addition and measured after 30 mins by MTase Glo reagent based luminescence assay	B	BAO_0000357	single protein format	Homo sapiens	None	None	None	None				CHEMBL2321643	Histone-lysine N-methyltransferase SMYD3	Homo sapiens	SINGLE PROTEIN	CHEMBL4304770	1	Scientific Literature	ACS Med Chem Lett	2019	None				1.3
CHEMBL5791191		None	465.62	0	1.94	BDBM433148	CCN(C)C1CCN(S(=O)(=O)N2[C@@H]3CC[C@H]2C[C@@H](NC(=O)c2cc(C4CC4)on2)C3)CC1	IC50	'='	6.5	nM	8.19		878031	UO_0000065	17.58	0.35	6.25	8.27	0	CHEMBL5734901	SMYD3 Biochemical Assay: The assays were all performed in a buffer consisting of 25 mM Tris-Cl pH 8.0
CHEMBL5938367		None	516.66	1	2.41	BDBM432796	O=C(N[C@H]1CCN(S(=O)(=O)CCCN2CCOCC2)[C@H](Cc2ccccc2)C1)c1cc(C2CC2)on1	IC50	'='	9960	nM	5		877679	UO_0000065	9.68	0.19	2.59	4.76	0	CHEMBL5734901	SMYD3 Biochemical Assay: The assays were all performed in a buffer consisting of 25 mM Tris-Cl pH 8.0
CHEMBL6019055		None	500.63	1	1.64	BDBM432814	CN(CCCN)c1ccc(S(=O)(=O)C23CC4CC(NC(=O)c5cc(C6CC6)on5)CC(C2)N43)cn1	IC50	'='	80.3	nM	7.09		877697	UO_0000065	14.17	0.28	5.46	5.27	0	CHEMBL5734901	SMYD3 Biochemical Assay: The assays were all performed in a buffer consisting of 25 mM Tris-Cl pH 8.0
CHEMBL6010190		None	405.48	0	1.5	BDBM432820	C[C@H]1C[C@@H](NC(=O)c2cc(C3CC3)on2)CCN1S(=O)(=O)c1cccnc1N	IC50	'='	1084	nM	5.96		877703	UO_0000065	14.71	0.29	4.46	4.54	0	CHEMBL5734901	SMYD3 Biochemical Assay: The assays were all performed in a buffer consisting of 25 mM Tris-Cl pH 8.0
CHEMBL5847089		None	512.68	1	3.52	BDBM432833	O=C(N[C@H]1C[C@H]2CC[C@@H](C1)N2S(=O)(=O)CC1CCN(Cc2ccccc2)CC1)c1cc(C2CC2)on1	IC50	'='	1.2	nM	8.92		877716	UO_0000065	17.4	0.34	5.4	9.32	0	CHEMBL5734901	SMYD3 Biochemical Assay: The assays were all performed in a buffer consisting of 25 mM Tris-Cl pH 8.0
CHEMBL5888247		None	501.65	1	2.63	BDBM432843	C[C@H]1C[C@@H](NC(=O)c2cc(C3CC3)on2)CCN1S(=O)(=O)N1CCC(NCc2ccccc2)CC1	IC50	'='	2.1	nM	8.68		877726	UO_0000065	17.3	0.34	6.05	8.05	0	CHEMBL5734901	SMYD3 Biochemical Assay: The assays were all performed in a buffer consisting of 25 mM Tris-Cl pH 8.0
CHEMBL5762527		None	453.61	0	1.84	BDBM432878	CC(C)NC1CCN(S(=O)(=O)N2CC[C@H](NC(=O)c3cc(C4CC4)on3)C[C@@H]2C)CC1	IC50	'='	10.1	nM	8		877761	UO_0000065	17.63	0.35	6.16	7.42	0	CHEMBL5734901	SMYD3 Biochemical Assay: The assays were all performed in a buffer consisting of 25 mM Tris-Cl pH 8.0
CHEMBL6015027		None	466.65	0	2.83	BDBM432908	CC(C)CN1CCC(CS(=O)(=O)N2CC[C@@H](NC(=O)c3cc(C4CC4)on3)C[C@H]2C)CC1	IC50	'='	20	nM	7.7		877791	UO_0000065	16.5	0.33	4.87	8.04	0	CHEMBL5734901	SMYD3 Biochemical Assay: The assays were all performed in a buffer consisting of 25 mM Tris-Cl pH 8.0
CHEMBL5877938		None	410.54	0	1.32	BDBM432915	C[C@H]1CN(S(=O)(=O)CC2CCNCC2)CC[C@H]1NC(=O)c1cc(C2CC2)on1	IC50	'='	23.2	nM	7.63		877798	UO_0000065	18.6	0.37	6.31	7.3	0	CHEMBL5734901	SMYD3 Biochemical Assay: The assays were all performed in a buffer consisting of 25 mM Tris-Cl pH 8.0
CHEMBL5838704		None	439.58	0	0.76	BDBM432917	CNCCN(C)CCS(=O)(=O)N1[C@@H]2CC[C@H]1C[C@@H](NC(=O)c1cc(C3CC3)on1)C2	IC50	'='	23.3	nM	7.63		877800	UO_0000065	17.36	0.35	6.87	7.08	0	CHEMBL5734901	SMYD3 Biochemical Assay: The assays were all performed in a buffer consisting of 25 mM Tris-Cl pH 8.0
CHEMBL5814972		None	370.48	0	0.67	BDBM432687	C[C@@H]1CN(S(=O)(=O)CCCN)CC[C@@H]1NC(=O)c1cc(C2CC2)on1	IC50	'='	70	nM	7.16		877570	UO_0000065	19.31	0.39	6.48	6.04	0	CHEMBL5734901	SMYD3 Biochemical Assay: The assays were all performed in a buffer consisting of 25 mM Tris-Cl pH 8.0
CHEMBL5964694		None	450.58	0	3.4	BDBM432689	N[C@H]1CC[C@H](C(=O)N2CC[C@@H](NC(=O)c3cc(C4CC4)on3)C[C@@H]2Cc2ccccc2)CC1	IC50	'>'	10000	nM			877572	UO_0000065					0	CHEMBL5734901	SMYD3 Biochemical Assay: The assays were all performed in a buffer consisting of 25 mM Tris-Cl pH 8.0
CHEMBL6062720		None	458.54	0	2.62	BDBM432703	CC(=O)Nc1ccc(S(=O)(=O)N2[C@@H]3CC[C@H]2C[C@@H](NC(=O)c2cc(C4CC4)on2)C3)cc1	IC50	'='	10000	nM	5		877586	UO_0000065	10.9	0.21	2.38	4.11	0	CHEMBL5734901	SMYD3 Biochemical Assay: The assays were all performed in a buffer consisting of 25 mM Tris-Cl pH 8.0
CHEMBL5833080		None	422.56	0	0.61	BDBM378504	NC1CCN(S(=O)(=O)N2[C@@H]3CC[C@H]2C[C@@H](NC(=O)c2cnn(C4CC4)c2)C3)CC1	IC50	'='	839	nM	6.08		756510	UO_0000065	14.38	0.29	5.47	5.35	0	CHEMBL5733491	SMYD3 Biochemical Assay: The assays were all performed in a buffer consisting of 25 mM Tris-Cl pH 8.0
CHEMBL5804737		None	320.39	0	0.49	BDBM378382	CC(NC(=O)c1cncc(O)c1)C1CCN(C(=O)[C@H](C)N)CC1	IC50	'>'	50000	nM			756388	UO_0000065					0	CHEMBL5733491	SMYD3 Biochemical Assay: The assays were all performed in a buffer consisting of 25 mM Tris-Cl pH 8.0
CHEMBL5975793		None	533.62	1	2.92	BDBM433090	O=C(N[C@H]1C[C@H]2CC[C@@H](C1)N2S(=O)(=O)N1CCC(NCCCC(F)(F)F)CC1)c1cc(C2CC2)on1	IC50	'='	1.87	nM	8.73		877973	UO_0000065	16.36	0.33	5.81	8.1	0	CHEMBL5734901	SMYD3 Biochemical Assay: The assays were all performed in a buffer consisting of 25 mM Tris-Cl pH 8.0
CHEMBL5768086		None	424.57	0	1.63	BDBM433093	CCc1cc(C(=O)N[C@H]2C[C@H]3CC[C@@H](C2)N3S(=O)(=O)CC2CCN(C)CC2)no1	IC50	'='	1.9	nM	8.72		877976	UO_0000065	20.54	0.41	7.09	9.11	0	CHEMBL5734901	SMYD3 Biochemical Assay: The assays were all performed in a buffer consisting of 25 mM Tris-Cl pH 8.0
CHEMBL6027958		None	439.58	0	1.4	BDBM433052	C[C@@H]1CN(S(=O)(=O)N2CC[C@H](NC(=O)c3cc(C4CC4)on3)C[C@@H]2C)C[C@H](C)N1C	IC50	'='	677	nM	6.17		877935	UO_0000065	14.03	0.28	4.77	6.23	0	CHEMBL5734901	SMYD3 Biochemical Assay: The assays were all performed in a buffer consisting of 25 mM Tris-Cl pH 8.0
CHEMBL5810336		None	360.46	0	1.66	BDBM433057	CC1(C(=O)N2CCC(NC(=O)c3cc(C4CC4)on3)CC2)CCNCC1	IC50	'='	742	nM	6.13		877940	UO_0000065	17	0.32	4.47	7.01	0	CHEMBL5734901	SMYD3 Biochemical Assay: The assays were all performed in a buffer consisting of 25 mM Tris-Cl pH 8.0
CHEMBL5777827		None	463.6	0	1.55	BDBM433078	CN1CCC2(CC1)CN(S(=O)(=O)N1[C@@H]3CC[C@H]1C[C@@H](NC(=O)c1cc(C4CC4)on1)C3)C2	IC50	'='	1.23	nM	8.91		877961	UO_0000065	19.22	0.38	7.36	9	0	CHEMBL5734901	SMYD3 Biochemical Assay: The assays were all performed in a buffer consisting of 25 mM Tris-Cl pH 8.0
CHEMBL6058468		None	385.49	0	0.27	BDBM432974	C[C@H]1C[C@@H](NC(=O)c2cc(C3CC3)on2)CCN1S(=O)(=O)N(C)CCN	IC50	'='	111	nM	6.96		877857	UO_0000065	18.04	0.37	6.68	5.71	0	CHEMBL5734901	SMYD3 Biochemical Assay: The assays were all performed in a buffer consisting of 25 mM Tris-Cl pH 8.0
CHEMBL5748732		None	500.67	1	3.03	BDBM432979	CN1CCC(CS(=O)(=O)N2CC[C@H](NC(=O)c3cc(C4CC4)on3)C[C@@H]2Cc2ccccc2)CC1	IC50	'='	121	nM	6.92		877862	UO_0000065	13.82	0.27	3.89	7.22	0	CHEMBL5734901	SMYD3 Biochemical Assay: The assays were all performed in a buffer consisting of 25 mM Tris-Cl pH 8.0
CHEMBL6051802		None	438.53	0	1.78	BDBM432980	C[C@@H]1C[C@H](NC(=O)c2cc(C3CC3)on2)CCN1C(=O)c1ccc(N2CCNCC2)nc1	IC50	'='	122	nM	6.91		877863	UO_0000065	15.77	0.3	5.13	6.67	0	CHEMBL5734901	SMYD3 Biochemical Assay: The assays were all performed in a buffer consisting of 25 mM Tris-Cl pH 8.0
CHEMBL5960161		None	397.5	0	0.28	BDBM432949	C[C@@H]1C[C@@H](NC(=O)c2cc(C3CC3)on2)CCN1S(=O)(=O)N1CCNCC1	IC50	'='	51.1	nM	7.29		877832	UO_0000065	18.34	0.37	7.01	6.77	0	CHEMBL5734901	SMYD3 Biochemical Assay: The assays were all performed in a buffer consisting of 25 mM Tris-Cl pH 8.0
CHEMBL5971384		None	424.57	0	1.81	BDBM433029	C[C@H]1CN(S(=O)(=O)CCN2CCCC2)[C@@H](C)C[C@H]1NC(=O)c1cc(C2CC2)on1	IC50	'='	431	nM	6.37		877912	UO_0000065	14.99	0.3	4.56	6.65	0	CHEMBL5734901	SMYD3 Biochemical Assay: The assays were all performed in a buffer consisting of 25 mM Tris-Cl pH 8.0
CHEMBL5989207		None	481.62	0	0.53	BDBM433040	O=C(N[C@H]1C[C@H]2CC[C@@H](C1)N2S(=O)(=O)CCNCCN1CCOCC1)c1cc(C2CC2)on1	IC50	'='	514	nM	6.29		877923	UO_0000065	13.06	0.26	5.76	5.37	0	CHEMBL5734901	SMYD3 Biochemical Assay: The assays were all performed in a buffer consisting of 25 mM Tris-Cl pH 8.0
CHEMBL5827944		None	409.51	0	0.43	BDBM433152	O=C(N[C@H]1C[C@H]2CC[C@@H](C1)N2S(=O)(=O)N1CCNCC1)c1cc(C2CC2)on1	IC50	'='	7.09	nM	8.15		878035	UO_0000065	19.9	0.4	7.72	7.56	0	CHEMBL5734901	SMYD3 Biochemical Assay: The assays were all performed in a buffer consisting of 25 mM Tris-Cl pH 8.0
CHEMBL5808327		None	449.58	0	1.3	BDBM433191	CN1CC2CCC1CN2S(=O)(=O)N1[C@@H]2CC[C@H]1C[C@@H](NC(=O)c1cc(C3CC3)on1)C2	IC50	'='	13.9	nM	7.86		878074	UO_0000065	17.48	0.35	6.56	7.94	0	CHEMBL5734901	SMYD3 Biochemical Assay: The assays were all performed in a buffer consisting of 25 mM Tris-Cl pH 8.0
CHEMBL5853825		None	396.49	0	2.69	BDBM432972	CNCc1ccc(C(=O)N2CC[C@@H](NC(=O)c3cc(C4CC4)on3)C[C@H]2C)cc1	IC50	'='	110	nM	6.96		877855	UO_0000065	17.55	0.33	4.27	7.96	0	CHEMBL5734901	SMYD3 Biochemical Assay: The assays were all performed in a buffer consisting of 25 mM Tris-Cl pH 8.0
CHEMBL6062859		None	469.61	0	1.08	BDBM433157	COCCNC1CCN(S(=O)(=O)N2CC[C@H](NC(=O)c3cc(C4CC4)on3)C[C@@H]2C)CC1	IC50	'='	7.65	nM	8.12		878040	UO_0000065	17.28	0.35	7.04	6.94	0	CHEMBL5734901	SMYD3 Biochemical Assay: The assays were all performed in a buffer consisting of 25 mM Tris-Cl pH 8.0
CHEMBL6023358		None	481.62	0	1.22	BDBM433166	COCCNC1CCN(S(=O)(=O)N2[C@@H]3CC[C@H]2C[C@@H](NC(=O)c2cc(C4CC4)on2)C3)CC1	IC50	'='	9.34	nM	8.03		878049	UO_0000065	16.67	0.33	6.81	6.86	0	CHEMBL5734901	SMYD3 Biochemical Assay: The assays were all performed in a buffer consisting of 25 mM Tris-Cl pH 8.0
CHEMBL5940522		None	437.57	0	1.25	BDBM433173	C[C@@H]1C[C@@H](NS(=O)(=O)N2[C@@H]3CC[C@H]2C[C@@H](NC(=O)c2cc(C4CC4)on2)C3)CCN1	IC50	'='	10	nM	8		878056	UO_0000065	18.28	0.36	6.75	6.86	0	CHEMBL5734901	SMYD3 Biochemical Assay: The assays were all performed in a buffer consisting of 25 mM Tris-Cl pH 8.0
CHEMBL5828843		None	479.6	0	0.66	BDBM433177	O=C(N[C@H]1C[C@H]2CC[C@@H](C1)N2S(=O)(=O)N1CC2CCC(C1)N2CCO)c1cc(C2CC2)on1	IC50	'='	10.9	nM	7.96		878060	UO_0000065	16.6	0.33	7.3	6.68	0	CHEMBL5734901	SMYD3 Biochemical Assay: The assays were all performed in a buffer consisting of 25 mM Tris-Cl pH 8.0
CHEMBL5959865		None	526.7	1	3.56	BDBM433190	CN1CCC([C@@H](Cc2ccccc2)S(=O)(=O)N2[C@@H]3CC[C@H]2C[C@@H](NC(=O)c2cc(C4CC4)on2)C3)CC1	IC50	'='	13.9	nM	7.86		878073	UO_0000065	14.92	0.29	4.3	8.21	0	CHEMBL5734901	SMYD3 Biochemical Assay: The assays were all performed in a buffer consisting of 25 mM Tris-Cl pH 8.0
CHEMBL5792217		None	401.49	0	2.67	BDBM432700	O=C(N[C@H]1C[C@H]2CC[C@@H](C1)N2S(=O)(=O)c1ccccc1)c1cc(C2CC2)on1	IC50	'='	4131	nM	5.38		877583	UO_0000065	13.41	0.26	2.71	5.82	0	CHEMBL5734901	SMYD3 Biochemical Assay: The assays were all performed in a buffer consisting of 25 mM Tris-Cl pH 8.0
CHEMBL5993048		None	470.55	0	2.42	BDBM432702	CC(=O)Nc1ccc(S(=O)(=O)C23CC4CC(NC(=O)c5cc(C6CC6)on5)CC(C2)N43)cc1	IC50	'='	4924	nM	5.31		877585	UO_0000065	11.28	0.22	2.89	4.36	0	CHEMBL5734901	SMYD3 Biochemical Assay: The assays were all performed in a buffer consisting of 25 mM Tris-Cl pH 8.0
CHEMBL6038790		None	388.51	0	2.42	BDBM432719	C[C@H]1CN(C(=O)[C@H]2CC[C@H](N)CC2)[C@@H](C)C[C@H]1NC(=O)c1cc(C2CC2)on1	IC50	'='	1955	nM	5.71		877602	UO_0000065	14.69	0.28	3.29	5.63	0	CHEMBL5734901	SMYD3 Biochemical Assay: The assays were all performed in a buffer consisting of 25 mM Tris-Cl pH 8.0
CHEMBL5937891		None	446.57	0	2.04	BDBM432723	NCCCS(=O)(=O)N1CC[C@H](NC(=O)c2cc(C3CC3)on2)C[C@H]1Cc1ccccc1	IC50	'='	250	nM	6.6		877606	UO_0000065	14.78	0.29	4.56	5.57	0	CHEMBL5734901	SMYD3 Biochemical Assay: The assays were all performed in a buffer consisting of 25 mM Tris-Cl pH 8.0
CHEMBL5777614		None	458.54	0	2.62	BDBM432730	CC(=O)Nc1ccc(S(=O)(=O)N2[C@@H]3CC[C@H]2C[C@H](NC(=O)c2cc(C4CC4)on2)C3)cc1	IC50	'='	3658	nM	5.44		877613	UO_0000065	11.86	0.23	2.82	4.47	0	CHEMBL5734901	SMYD3 Biochemical Assay: The assays were all performed in a buffer consisting of 25 mM Tris-Cl pH 8.0
CHEMBL5880121		None	227.31	0	-0.9	BDBM378304	N[C@H]1CC[C@H](NC(=O)[C@H]2C[C@H](O)CN2)CC1	IC50	'>'	100000	nM			756310	UO_0000065					0	CHEMBL5733491	SMYD3 Biochemical Assay: The assays were all performed in a buffer consisting of 25 mM Tris-Cl pH 8.0
CHEMBL5818843		None	273.38	0	1.8	BDBM378305	N[C@H]1CC[C@H](NC(=O)[C@H]2CCc3ccccc3N2)CC1	IC50	'='	12510	nM	4.9		756311	UO_0000065	17.93	0.33	3.1	7.3	0	CHEMBL5733491	SMYD3 Biochemical Assay: The assays were all performed in a buffer consisting of 25 mM Tris-Cl pH 8.0
CHEMBL5852989		None	296.4	0	0.65	BDBM378311	NCCC(=O)N[C@H]1CC[C@H](NC(=O)c2cncs2)CC1	IC50	'>'	100000	nM			756317	UO_0000065					0	CHEMBL5733491	SMYD3 Biochemical Assay: The assays were all performed in a buffer consisting of 25 mM Tris-Cl pH 8.0
CHEMBL5818684		None	388.47	0	1.11	BDBM378319	CC1Oc2ccc(C(=O)NC(C)C3CCN(C(=O)[C@H](C)N)CC3)cc2NC1=O	IC50	'='	25370	nM	4.6		756325	UO_0000065	11.83	0.22	3.49	4.04	0	CHEMBL5733491	SMYD3 Biochemical Assay: The assays were all performed in a buffer consisting of 25 mM Tris-Cl pH 8.0
CHEMBL5885707		None	324.45	0	1.16	BDBM378129	Cc1nscc1C(=O)NC(C)C1CCN(C(=O)[C@H](C)N)CC1	IC50	'>'	100000	nM			756135	UO_0000065					0	CHEMBL5733491	SMYD3 Biochemical Assay: The assays were all performed in a buffer consisting of 25 mM Tris-Cl pH 8.0
CHEMBL6064026		None	244.25	0	0.89	BDBM377902	NCc1ccc(NC(=O)c2ccc(O)nn2)cc1	IC50	'='	130630	nM		Outside typical range	755914	UO_0000065					0	CHEMBL5733491	SMYD3 Biochemical Assay: The assays were all performed in a buffer consisting of 25 mM Tris-Cl pH 8.0
CHEMBL6059971		None	224.26	0	-0.39	BDBM377939	Cn1nc(O)cc1C(=O)NC1CCNCC1	IC50	'='	19720	nM	4.71		755949	UO_0000065	20.98	0.4	5.1	5.94	0	CHEMBL5733491	SMYD3 Biochemical Assay: The assays were all performed in a buffer consisting of 25 mM Tris-Cl pH 8.0
CHEMBL5786308		None	283.38	0	2.42	BDBM377946	Nc1ccc2cc(C(=O)N[C@H]3CC[C@H](N)CC3)ccc2c1	IC50	'='	62500	nM	4.2		755955	UO_0000065	14.84	0.27	1.78	5.18	0	CHEMBL5733491	SMYD3 Biochemical Assay: The assays were all performed in a buffer consisting of 25 mM Tris-Cl pH 8.0
CHEMBL6057336		None	285.35	0	1.94	BDBM377947	N[C@H]1CC[C@H](NC(=O)c2ccc3nc(O)ccc3c2)CC1	IC50	'='	115320	nM		Outside typical range	755956	UO_0000065					0	CHEMBL5733491	SMYD3 Biochemical Assay: The assays were all performed in a buffer consisting of 25 mM Tris-Cl pH 8.0
CHEMBL5925011		None	285.35	0	1.94	BDBM378073	N[C@H]1CC[C@H](NC(=O)c2cc(O)nc3ccccc23)CC1	IC50	'>'	100000	nM			756079	UO_0000065					0	CHEMBL5733491	SMYD3 Biochemical Assay: The assays were all performed in a buffer consisting of 25 mM Tris-Cl pH 8.0
CHEMBL5986406		None	362.86	0	2.33	BDBM378102	NCCC(=O)N[C@H]1CC[C@H](NC(=O)c2cc3cc(Cl)ccc3[nH]2)CC1	IC50	'='	37470	nM	4.43		756108	UO_0000065	12.2	0.24	2.1	4.43	0	CHEMBL5733491	SMYD3 Biochemical Assay: The assays were all performed in a buffer consisting of 25 mM Tris-Cl pH 8.0
CHEMBL5761510		None	275.33	0	2.31	BDBM378113	N[C@H]1CC[C@H](NC(=O)c2cc3cc(F)ccc3[nH]2)CC1	IC50	'>'	100000	nM			756119	UO_0000065					0	CHEMBL5733491	SMYD3 Biochemical Assay: The assays were all performed in a buffer consisting of 25 mM Tris-Cl pH 8.0
CHEMBL6017864		None	470	0	0.94	BDBM378501	C[C@@H]1CN(S(=O)(=O)N2CCC(N)CC2)CC[C@@H]1NC(=O)c1cc2c(cc1Cl)NC(=O)C2	IC50	'='	529	nM	6.28		756507	UO_0000065	13.35	0.28	5.34	5.03	0	CHEMBL5733491	SMYD3 Biochemical Assay: The assays were all performed in a buffer consisting of 25 mM Tris-Cl pH 8.0
CHEMBL5983633		None	371.44	0	1.76	BDBM378348	NCCC(=O)N[C@H]1CC[C@H](NC(=O)c2cc3cccc(O)c3cc2O)CC1	IC50	'='	5020	nM	5.3		756354	UO_0000065	14.27	0.27	3.54	4.25	0	CHEMBL5733491	SMYD3 Biochemical Assay: The assays were all performed in a buffer consisting of 25 mM Tris-Cl pH 8.0
CHEMBL5865336		None	336.44	0	-0.3	BDBM378352	NCCC(=O)N1CCC(CC(=O)N2CCC3NC(=O)CC3C2)CC1	IC50	'='	10250	nM	4.99		756358	UO_0000065	14.83	0.28	5.29	5.21	0	CHEMBL5733491	SMYD3 Biochemical Assay: The assays were all performed in a buffer consisting of 25 mM Tris-Cl pH 8.0
CHEMBL5828713		None	321.38	0	0.45	BDBM378354	NCCC(=O)N[C@H]1CC[C@H](NC(=O)c2noc(C3CC3)n2)CC1	IC50	'='	12920	nM	4.89		756360	UO_0000065	15.21	0.29	4.44	3.97	0	CHEMBL5733491	SMYD3 Biochemical Assay: The assays were all performed in a buffer consisting of 25 mM Tris-Cl pH 8.0
CHEMBL5874190		None	383.5	0	1.83	BDBM378358	Cc1nc2ccccc2c(C(=O)NC(C)C2CCN(C(=O)[C@H](C)N)CC2)c1N	IC50	'='	31620	nM	4.5		756364	UO_0000065	11.73	0.22	2.67	3.94	0	CHEMBL5733491	SMYD3 Biochemical Assay: The assays were all performed in a buffer consisting of 25 mM Tris-Cl pH 8.0
CHEMBL5896546		None	234.3	0	0.81	BDBM378364	N[C@H]1CC[C@H](NC(=O)/C=C/c2c[nH]cn2)CC1	IC50	'>'	100000	nM			756370	UO_0000065					0	CHEMBL5733491	SMYD3 Biochemical Assay: The assays were all performed in a buffer consisting of 25 mM Tris-Cl pH 8.0
CHEMBL5805392		None	344.42	0	0.66	BDBM378365	CC(NC(=O)c1cc2cn[nH]c2cn1)C1CCN(C(=O)[C@H](C)N)CC1	IC50	'='	6570	nM	5.18		756371	UO_0000065	15.05	0.28	4.52	4.43	0	CHEMBL5733491	SMYD3 Biochemical Assay: The assays were all performed in a buffer consisting of 25 mM Tris-Cl pH 8.0
CHEMBL5758392		None	358.4	0	0.33	BDBM378373	NCCC(=O)N[C@H]1CC[C@H](NC(=O)c2ccc3c(c2)C(=O)C(=O)N3)CC1	IC50	'='	5380	nM	5.27		756379	UO_0000065	14.7	0.28	4.94	4.04	0	CHEMBL5733491	SMYD3 Biochemical Assay: The assays were all performed in a buffer consisting of 25 mM Tris-Cl pH 8.0
CHEMBL5814827		None	306.37	0	0.29	BDBM378381	NCCC(=O)N[C@H]1CC[C@H](NC(=O)c2ncccc2O)CC1	IC50	'>'	50000	nM			756387	UO_0000065					0	CHEMBL5733491	SMYD3 Biochemical Assay: The assays were all performed in a buffer consisting of 25 mM Tris-Cl pH 8.0
CHEMBL5778274		None	208.26	0	0.41	BDBM378386	NC1CCC(NC(=O)c2c[nH]cn2)CC1	IC50	'>'	50000	nM			756392	UO_0000065					0	CHEMBL5733491	SMYD3 Biochemical Assay: The assays were all performed in a buffer consisting of 25 mM Tris-Cl pH 8.0
CHEMBL5890126		None	294.36	0	-0.49	BDBM378392	CC(NC(=O)c1nnc[nH]1)C1CCN(C(=O)[C@H](C)N)CC1	IC50	'>'	50000	nM			756398	UO_0000065					0	CHEMBL5733491	SMYD3 Biochemical Assay: The assays were all performed in a buffer consisting of 25 mM Tris-Cl pH 8.0
CHEMBL5742438		None	330.39	0	0.46	BDBM378396	NCCC(=O)N[C@H]1CC[C@H](NC(=O)c2cc3cn[nH]c3cn2)CC1	IC50	'='	4450	nM	5.35		756402	UO_0000065	16.2	0.3	4.89	4.25	0	CHEMBL5733491	SMYD3 Biochemical Assay: The assays were all performed in a buffer consisting of 25 mM Tris-Cl pH 8.0
CHEMBL5942846		None	222.29	0	0.72	BDBM378409	Cc1[nH]cnc1C(=O)N[C@H]1CC[C@H](N)CC1	IC50	'>'	50000	nM			756415	UO_0000065					0	CHEMBL5733491	SMYD3 Biochemical Assay: The assays were all performed in a buffer consisting of 25 mM Tris-Cl pH 8.0
CHEMBL6042938		None	320.4	0	-0.08	BDBM378414	O=C(NC1CCN(C(=O)CC2CCNCC2)CC1)c1nnc[nH]1	IC50	'>'	50000	nM			756420	UO_0000065					0	CHEMBL5733491	SMYD3 Biochemical Assay: The assays were all performed in a buffer consisting of 25 mM Tris-Cl pH 8.0
CHEMBL6059414		None	339.46	0	0.95	BDBM378431	C[C@@H]1C[C@H](NC(=O)c2ccccc2)CCN1S(=O)(=O)CCCN	IC50	'>'	10000	nM			756437	UO_0000065					0	CHEMBL5733491	SMYD3 Biochemical Assay: The assays were all performed in a buffer consisting of 25 mM Tris-Cl pH 8.0
CHEMBL3799083		None	446.57	0	1.51	BDBM378442	N[C@H]1CC[C@H](S(=O)(=O)N2[C@@H]3CC[C@H]2C[C@@H](NC(=O)c2ccc4c(c2)CC(=O)N4)C3)CC1	IC50	'='	0.44	nM	9.36		756448	UO_0000065	20.95	0.41	7.85	7.69	0	CHEMBL5733491	SMYD3 Biochemical Assay: The assays were all performed in a buffer consisting of 25 mM Tris-Cl pH 8.0
CHEMBL5768604		None	481.02	0	1.89	BDBM378465	O=C1Cc2cc(C(=O)N[C@H]3C[C@H]4CC[C@@H](C3)N4S(=O)(=O)CC3CCCNC3)c(Cl)cc2N1	IC50	'='	4.12	nM	8.38		756471	UO_0000065	17.43	0.36	6.5	7.79	0	CHEMBL5733491	SMYD3 Biochemical Assay: The assays were all performed in a buffer consisting of 25 mM Tris-Cl pH 8.0
CHEMBL5768604		None	481.02	0	1.89	BDBM378465	O=C1Cc2cc(C(=O)N[C@H]3C[C@H]4CC[C@@H](C3)N4S(=O)(=O)CC3CCCNC3)c(Cl)cc2N1	IC50	'='	4.99	nM	8.3		756473	UO_0000065	17.26	0.35	6.41	7.71	0	CHEMBL5733491	SMYD3 Biochemical Assay: The assays were all performed in a buffer consisting of 25 mM Tris-Cl pH 8.0
CHEMBL6058319		None	471.53	0	2.33	BDBM378489	NC1CCC(S(=O)(=O)N2[C@@H]3CC[C@H]2C[C@@H](NC(=O)c2ccc4c(c2)OC(F)(F)O4)C3)CC1	IC50	'='	131	nM	6.88		756495	UO_0000065	14.6	0.29	4.55	6.2	0	CHEMBL5733491	SMYD3 Biochemical Assay: The assays were all performed in a buffer consisting of 25 mM Tris-Cl pH 8.0
CHEMBL5944019		None	314.4	0	-0.22	BDBM378175	CC(NC(=O)[C@@H]1C[C@H](F)CN1)C1CCN(C(=O)[C@H](C)N)CC1	IC50	'='	55920	nM	4.25		756181	UO_0000065	13.53	0.26	4.47	4.86	0	CHEMBL5733491	SMYD3 Biochemical Assay: The assays were all performed in a buffer consisting of 25 mM Tris-Cl pH 8.0
CHEMBL6002947		None	237.28	0	1.22	BDBM378178	N[C@H]1CC[C@H](NC(=O)c2ccncc2F)CC1	IC50	'>'	100000	nM			756184	UO_0000065					0	CHEMBL5733491	SMYD3 Biochemical Assay: The assays were all performed in a buffer consisting of 25 mM Tris-Cl pH 8.0
CHEMBL5863769		None	323.4	0	-0.66	BDBM378181	CC(NC(=O)C1=NNC(=O)CC1)C1CCN(C(=O)[C@H](C)N)CC1	IC50	'>'	100000	nM			756187	UO_0000065					0	CHEMBL5733491	SMYD3 Biochemical Assay: The assays were all performed in a buffer consisting of 25 mM Tris-Cl pH 8.0
CHEMBL5746142		None	305.42	0	1.09	BDBM378285	NCCC(=O)N[C@H]1CC[C@H](NC(=O)C2C[C@@H]3C=C[C@H]2C3)CC1	IC50	'>'	100000	nM			756291	UO_0000065					0	CHEMBL5733491	SMYD3 Biochemical Assay: The assays were all performed in a buffer consisting of 25 mM Tris-Cl pH 8.0
CHEMBL5810417		None	358.44	0	0.62	BDBM378334	NCCC(=O)N[C@H]1CC[C@H](NC(=O)Cc2ccc3c(c2)CC(=O)N3)CC1	IC50	'='	38810	nM	4.41		756340	UO_0000065	12.31	0.23	3.79	3.89	0	CHEMBL5733491	SMYD3 Biochemical Assay: The assays were all performed in a buffer consisting of 25 mM Tris-Cl pH 8.0
CHEMBL5954092		None	451.57	0	3.07	BDBM432778	C[C@H]1C[C@@H](NC(=O)c2cc(C3CC3)on2)CCN1C(=O)N1CCN(Cc2ccccc2)CC1	IC50	'>'	10000	nM			877661	UO_0000065					0	CHEMBL5734901	SMYD3 Biochemical Assay: The assays were all performed in a buffer consisting of 25 mM Tris-Cl pH 8.0
CHEMBL5803355		None	436.56	0	3.44	BDBM432941	C[C@@H]1C[C@H](NC(=O)c2cc(C3CC3)on2)CCN1C(=O)c1ccc(C2CCNCC2)cc1	IC50	'='	41.3	nM	7.38		877824	UO_0000065	16.91	0.32	3.94	8.44	0	CHEMBL5734901	SMYD3 Biochemical Assay: The assays were all performed in a buffer consisting of 25 mM Tris-Cl pH 8.0
CHEMBL5976516		None	436.58	0	1.95	BDBM433066	CN1CCC(CS(=O)(=O)N2[C@@H]3CC[C@H]2C[C@@H](NC(=O)c2cc(C4CC4)on2)C3)CC1	IC50	'='	0.88	nM	9.06		877949	UO_0000065	20.74	0.41	7.11	9.46	0	CHEMBL5734901	SMYD3 Biochemical Assay: The assays were all performed in a buffer consisting of 25 mM Tris-Cl pH 8.0
CHEMBL6015257		None	430.53	0	2.12	BDBM433224	NCc1ccc(S(=O)(=O)N2[C@@H]3CC[C@H]2C[C@@H](NC(=O)c2cc(C4CC4)on2)C3)cc1	IC50	'='	36.8	nM	7.43		878107	UO_0000065	17.27	0.34	5.31	6.27	0	CHEMBL5734901	SMYD3 Biochemical Assay: The assays were all performed in a buffer consisting of 25 mM Tris-Cl pH 8.0
CHEMBL5928192		None	538.72	1	1.11	BDBM433230	C[C@H]1C[C@@H](NC(=O)c2cc(C3CC3)on2)CCN1S(=O)(=O)N1CCC(N(C)CCN2CCOCC2)CC1	IC50	'='	43	nM	7.37		878113	UO_0000065	13.67	0.27	6.26	6.61	0	CHEMBL5734901	SMYD3 Biochemical Assay: The assays were all performed in a buffer consisting of 25 mM Tris-Cl pH 8.0
CHEMBL5995390		None	499.64	0	2.04	BDBM433235	O=C(N[C@H]1C[C@H]2CC[C@@H](C1)N2S(=O)(=O)N1CCNCC1Cc1ccccc1)c1cc(C2CC2)on1	IC50	'='	47.5	nM	7.32		878118	UO_0000065	14.66	0.29	5.28	6.79	0	CHEMBL5734901	SMYD3 Biochemical Assay: The assays were all performed in a buffer consisting of 25 mM Tris-Cl pH 8.0
CHEMBL5913581		None	506.59	1	2.99	BDBM432995	C[C@H]1CN(S(=O)(=O)CC2CCN(CCC(F)(F)F)CC2)CC[C@H]1NC(=O)c1cc(C2CC2)on1	IC50	'='	179	nM	6.75		877878	UO_0000065	13.32	0.27	3.76	7.05	0	CHEMBL5734901	SMYD3 Biochemical Assay: The assays were all performed in a buffer consisting of 25 mM Tris-Cl pH 8.0
CHEMBL5956248		None	454.59	0	1.03	BDBM432920	C[C@H]1CN(S(=O)(=O)CC2CCN(CCO)CC2)CC[C@H]1NC(=O)c1cc(C2CC2)on1	IC50	'='	23.7	nM	7.62		877803	UO_0000065	16.77	0.34	6.6	6.57	0	CHEMBL5734901	SMYD3 Biochemical Assay: The assays were all performed in a buffer consisting of 25 mM Tris-Cl pH 8.0
CHEMBL5837914		None	425.56	0	1.06	BDBM432935	C[C@H]1C[C@@H](NC(=O)c2cc(C3CC3)on2)CCN1S(=O)(=O)N1CCNC(C)(C)C1	IC50	'='	33.7	nM	7.47		877818	UO_0000065	17.56	0.35	6.41	6.93	0	CHEMBL5734901	SMYD3 Biochemical Assay: The assays were all performed in a buffer consisting of 25 mM Tris-Cl pH 8.0
CHEMBL5785053		None	437.57	0	1.16	BDBM432928	C[C@H]1C[C@@H](NC(=O)c2cc(C3CC3)on2)CCN1S(=O)(=O)N1CC2CCC1CN2C	IC50	'='	29.8	nM	7.53		877811	UO_0000065	17.2	0.34	6.37	7.6	0	CHEMBL5734901	SMYD3 Biochemical Assay: The assays were all performed in a buffer consisting of 25 mM Tris-Cl pH 8.0
CHEMBL6045481		None	458.58	0	2.05	BDBM433014	O=C(N[C@H]1CCN(S(=O)(=O)C2CCNC2)[C@@H](Cc2ccccc2)C1)c1cc(C2CC2)on1	IC50	'='	306	nM	6.51		877897	UO_0000065	14.21	0.28	4.46	6.23	0	CHEMBL5734901	SMYD3 Biochemical Assay: The assays were all performed in a buffer consisting of 25 mM Tris-Cl pH 8.0
CHEMBL5798999		None	437.57	0	1.21	BDBM433021	CN(C1CCNCC1)S(=O)(=O)N1[C@@H]2CC[C@H]1C[C@H](NC(=O)c1cc(C3CC3)on1)C2	IC50	'='	333	nM	6.48		877904	UO_0000065	14.8	0.29	5.27	6.01	0	CHEMBL5734901	SMYD3 Biochemical Assay: The assays were all performed in a buffer consisting of 25 mM Tris-Cl pH 8.0
CHEMBL5957924		None	528.68	1	2.9	BDBM433023	O=C(N[C@H]1C[C@H]2CC[C@@H](C1)N2S(=O)(=O)CCN1CCC(OCc2ccccc2)C1)c1cc(C2CC2)on1	IC50	'='	360	nM	6.44		877906	UO_0000065	12.19	0.24	3.54	6.14	0	CHEMBL5734901	SMYD3 Biochemical Assay: The assays were all performed in a buffer consisting of 25 mM Tris-Cl pH 8.0
CHEMBL5808805		None	408.52	0	1.36	BDBM433026	O=C(N[C@@H]1C[C@H]2CC[C@@H](C1)N2S(=O)(=O)C1CCCNC1)c1cc(C2CC2)on1	IC50	'='	411	nM	6.39		877909	UO_0000065	15.63	0.31	5.03	6.11	0	CHEMBL5734901	SMYD3 Biochemical Assay: The assays were all performed in a buffer consisting of 25 mM Tris-Cl pH 8.0
CHEMBL5741869		None	500.67	1	3.23	BDBM432952	C[C@H]1CN(S(=O)(=O)CC2CCN(Cc3ccccc3)CC2)CC[C@H]1NC(=O)c1cc(C2CC2)on1	IC50	'='	56.4	nM	7.25		877835	UO_0000065	14.48	0.28	4.02	7.57	0	CHEMBL5734901	SMYD3 Biochemical Assay: The assays were all performed in a buffer consisting of 25 mM Tris-Cl pH 8.0
CHEMBL5983928		None	422.55	0	1.88	BDBM432822	NC1CCC(S(=O)(=O)N2[C@@H]3CC[C@H]2C[C@@H](NC(=O)c2cc(C4CC4)on2)C3)CC1	IC50	'='	0.8	nM	9.1		877705	UO_0000065	21.53	0.43	7.22	7.67	0	CHEMBL5734901	SMYD3 Biochemical Assay: The assays were all performed in a buffer consisting of 25 mM Tris-Cl pH 8.0
CHEMBL5799048		None	475.62	0	3.01	BDBM432681	CC(C)CN(C)c1ccc(S(=O)(=O)N2CC[C@H](NC(=O)c3cc(C4CC4)on3)C[C@@H]2C)cn1	IC50	'>'	10000	nM			877564	UO_0000065					0	CHEMBL5734901	SMYD3 Biochemical Assay: The assays were all performed in a buffer consisting of 25 mM Tris-Cl pH 8.0
CHEMBL5849122		None	393.45	0	2.85	BDBM432725	C[C@@H]1C[C@@H](NC(=O)c2cc(C3CC3)on2)CCN1C(=O)c1ccc2[nH]cnc2c1	IC50	'>'	10000	nM			877608	UO_0000065					0	CHEMBL5734901	SMYD3 Biochemical Assay: The assays were all performed in a buffer consisting of 25 mM Tris-Cl pH 8.0
CHEMBL5678791		None	422.55	0	1.88	Chemical probe: EPZ028862	N[C@H]1CC[C@H](S(=O)(=O)N2[C@@H]3CC[C@H]2C[C@@H](NC(=O)c2cc(C4CC4)on2)C3)CC1	IC50	'='	1.8	nM	8.74			UO_0000065	20.7	0.41	6.86	7.38	0	CHEMBL5675949	Inhibition of SMYD3 (unknown origin) N-terminal GST-tagged MAP3K2 and 3H-SAM as substrate for 2 hrs by TopCount NXT plate reader	B	BAO_0000357	single protein format	Homo sapiens	None	None	None	None	EFO_ID: MONDO:0004992 | EFO_TERM: cancer			CHEMBL2321643	Histone-lysine N-methyltransferase SMYD3	Homo sapiens	SINGLE PROTEIN	CHEMBL5674880	72	Chemical Probe data from Scientific Literature	PLoS One	2018	None	TIME = 2.0 hr	INHIBITOR		1.8
CHEMBL6057767		None	407.47	0	2.86	BDBM433044	C[C@@H]1C[C@H](NC(=O)c2cc(C3CC3)on2)CCN1C(=O)c1ccc2c(c1)ncn2C	IC50	'='	583	nM	6.23		877927	UO_0000065	15.3	0.28	3.37	6.68	0	CHEMBL5734901	SMYD3 Biochemical Assay: The assays were all performed in a buffer consisting of 25 mM Tris-Cl pH 8.0
CHEMBL5753497		None	265.36	0	0.11	BDBM378330	O=C1CC2CN(C(=O)CC3CCNCC3)CCC2N1	IC50	'>'	100000	nM			756336	UO_0000065					0	CHEMBL5733491	SMYD3 Biochemical Assay: The assays were all performed in a buffer consisting of 25 mM Tris-Cl pH 8.0
CHEMBL5965260		None	334.42	0	1.26	BDBM432494	C[C@@H]1CN(C(=O)CCCN)CC[C@@H]1NC(=O)c1cc(C2CC2)on1	IC50	'='	2866	nM	5.54		877377	UO_0000065	16.57	0.32	4.28	5.46	0	CHEMBL5734901	SMYD3 Biochemical Assay: The assays were all performed in a buffer consisting of 25 mM Tris-Cl pH 8.0
CHEMBL5943569		None	356.37	0	1.26	BDBM432498	NCCCC(=O)N1CCC(NC(=O)c2cc(C3CC3)on2)C(F)(F)C1	IC50	'>'	10000	nM			877381	UO_0000065					0	CHEMBL5734901	SMYD3 Biochemical Assay: The assays were all performed in a buffer consisting of 25 mM Tris-Cl pH 8.0
CHEMBL5753054		None	477.36	0	2.31	BDBM432310	N[C@@H](Cc1ccc(O)c(Br)c1)C(=O)N1CCC(NC(=O)c2cc(C3CC3)on2)CC1	IC50	'='	214	nM	6.67		877195	UO_0000065	13.97	0.3	4.36	5.48	0	CHEMBL5734901	SMYD3 Biochemical Assay: The assays were all performed in a buffer consisting of 25 mM Tris-Cl pH 8.0
CHEMBL5950789		None	346.43	0	1.27	BDBM432318	O=C(NC1CCN(C(=O)C2CCNCC2)CC1)c1cc(C2CC2)on1	IC50	'='	8545	nM	5.07		877201	UO_0000065	14.63	0.28	3.8	5.79	0	CHEMBL5734901	SMYD3 Biochemical Assay: The assays were all performed in a buffer consisting of 25 mM Tris-Cl pH 8.0
CHEMBL5773287		None	374.49	0	2.18	BDBM432359	C[C@@H]1C[C@@H](NC(=O)c2cc(C3CC3)on2)CCN1C(=O)[C@H]1CC[C@H](N)CC1	IC50	'='	1402	nM	5.85		877242	UO_0000065	15.63	0.3	3.67	5.77	0	CHEMBL5734901	SMYD3 Biochemical Assay: The assays were all performed in a buffer consisting of 25 mM Tris-Cl pH 8.0
CHEMBL5751262		None	356.45	0	0.42	BDBM432378	C[C@@H]1CC(NC(=O)c2cc(C3CC3)on2)CCN1S(=O)(=O)CCN	IC50	'='	633	nM	6.2		877261	UO_0000065	17.39	0.35	5.78	5.23	0	CHEMBL5734901	SMYD3 Biochemical Assay: The assays were all performed in a buffer consisting of 25 mM Tris-Cl pH 8.0
CHEMBL5833630		None	320.39	0	1.01	BDBM432383	C[C@H]1C[C@@H](NC(=O)c2cc(C3CC3)on2)CCN1C(=O)CCN	IC50	'='	10506	nM	4.98		877266	UO_0000065	15.54	0.3	3.97	4.91	0	CHEMBL5734901	SMYD3 Biochemical Assay: The assays were all performed in a buffer consisting of 25 mM Tris-Cl pH 8.0
CHEMBL5832170		None	360.46	0	1.79	BDBM432397	C[C@@H]1CC(NC(=O)c2cc(C3CC3)on2)CCN1C(=O)[C@@H]1CC[C@H](N)C1	IC50	'='	1900	nM	5.72		877280	UO_0000065	15.87	0.3	3.93	5.64	0	CHEMBL5734901	SMYD3 Biochemical Assay: The assays were all performed in a buffer consisting of 25 mM Tris-Cl pH 8.0
CHEMBL5924508		None	362.47	0	2.04	BDBM432404	C[C@H]1CC(NC(=O)c2cc(C3CC3)on2)CCN1C(=O)CC(C)(C)CN	IC50	'='	1445	nM	5.84		877287	UO_0000065	16.11	0.31	3.8	5.76	0	CHEMBL5734901	SMYD3 Biochemical Assay: The assays were all performed in a buffer consisting of 25 mM Tris-Cl pH 8.0
CHEMBL5969701		None	402.54	0	2.78	BDBM432406	C[C@H]1CC(NC(=O)c2cc(C3CC3)on2)CCN1C(=O)[C@H]1CC[C@H](N(C)C)CC1	IC50	'='	19988	nM	4.7		877289	UO_0000065	11.67	0.22	1.92	5.97	0	CHEMBL5734901	SMYD3 Biochemical Assay: The assays were all performed in a buffer consisting of 25 mM Tris-Cl pH 8.0
CHEMBL5757032		None	388.51	0	2.44	BDBM432417	C[C@@H]1CC(NC(=O)c2cc(C3CC3)on2)CCN1C(=O)CC1(C)CCNCC1	IC50	'='	2908	nM	5.54		877300	UO_0000065	14.25	0.27	3.1	6.33	0	CHEMBL5734901	SMYD3 Biochemical Assay: The assays were all performed in a buffer consisting of 25 mM Tris-Cl pH 8.0
CHEMBL5818231		None	374.49	0	2.18	BDBM432418	C[C@H]1CC(NC(=O)c2cc(C3CC3)on2)CCN1C(=O)[C@H]1CCC[C@@H](N)C1	IC50	'='	5603	nM	5.25		877301	UO_0000065	14.02	0.27	3.07	5.18	0	CHEMBL5734901	SMYD3 Biochemical Assay: The assays were all performed in a buffer consisting of 25 mM Tris-Cl pH 8.0
CHEMBL6063395		None	455.56	0	2.95	BDBM432422	CC(C)c1cc(C[C@@H](CO)C(=O)N2CCC(NC(=O)c3cc(C4CC4)on3)CC2)ccc1O	IC50	'='	9.57	nM	8.02		877305	UO_0000065	17.6	0.33	5.07	6.92	0	CHEMBL5734901	SMYD3 Biochemical Assay: The assays were all performed in a buffer consisting of 25 mM Tris-Cl pH 8.0
CHEMBL5956451		None	372.47	0	1.79	BDBM432424	N[C@H]1CC[C@H](C(=O)N2CC3CC2CC3NC(=O)c2cc(C3CC3)on2)CC1	IC50	'='	1168	nM	5.93		877307	UO_0000065	15.93	0.3	4.14	5.85	0	CHEMBL5734901	SMYD3 Biochemical Assay: The assays were all performed in a buffer consisting of 25 mM Tris-Cl pH 8.0
CHEMBL5876141		None	388.51	0	2.44	BDBM432442	CC1CC(CC(=O)N2CCC(NC(=O)c3cc(C4CC4)on3)C[C@@H]2C)CCN1	IC50	'='	3526	nM	5.45		877325	UO_0000065	14.03	0.27	3.01	6.23	0	CHEMBL5734901	SMYD3 Biochemical Assay: The assays were all performed in a buffer consisting of 25 mM Tris-Cl pH 8.0
CHEMBL5922871		None	386.5	0	2.05	BDBM432445	C[C@@H]1CC(NC(=O)c2cc(C3CC3)on2)CCN1C(=O)C1CC2(CCNC2)C1	IC50	'='	546	nM	6.26		877328	UO_0000065	16.2	0.31	4.21	7.16	0	CHEMBL5734901	SMYD3 Biochemical Assay: The assays were all performed in a buffer consisting of 25 mM Tris-Cl pH 8.0
CHEMBL5762646		None	374.49	0	1.91	BDBM432448	C[C@@H]1CN(C(=O)CC2CCNCC2)CC[C@H]1NC(=O)c1cc(C2CC2)on1	IC50	'='	1527	nM	5.82		877331	UO_0000065	15.53	0.29	3.91	6.65	0	CHEMBL5734901	SMYD3 Biochemical Assay: The assays were all performed in a buffer consisting of 25 mM Tris-Cl pH 8.0
CHEMBL6029393		None	396.49	0	2.41	BDBM432520	NCCCC(=O)N1CC[C@@H](NC(=O)c2cc(C3CC3)on2)[C@H](c2ccccc2)C1	IC50	'='	2522	nM	5.6		877403	UO_0000065	14.12	0.26	3.19	5.52	0	CHEMBL5734901	SMYD3 Biochemical Assay: The assays were all performed in a buffer consisting of 25 mM Tris-Cl pH 8.0
CHEMBL6016067		None	350.42	0	0.37	BDBM432525	C[C@@H]1C[C@@H](NC(=O)c2cc(C3CC3)on2)CCN1C(=O)CC(O)CN	IC50	'='	9049	nM	5.04		877408	UO_0000065	14.39	0.28	4.67	4.14	0	CHEMBL5734901	SMYD3 Biochemical Assay: The assays were all performed in a buffer consisting of 25 mM Tris-Cl pH 8.0
CHEMBL5822176		None	412.49	0	1.94	BDBM432308	C[C@H]1CC(NC(=O)c2cc(C3CC3)on2)CCN1C(=O)[C@@H](N)Cc1ccc(O)cc1	IC50	'='	1045	nM	5.98		877193	UO_0000065	14.5	0.27	4.04	4.91	0	CHEMBL5734901	SMYD3 Biochemical Assay: The assays were all performed in a buffer consisting of 25 mM Tris-Cl pH 8.0
CHEMBL6062286		None	595.48	1	2.27	BDBM432344	C[C@@H](N)C(=O)NC[C@H](Cc1ccc(O)c(I)c1)C(=O)N1CCC(NCc2cc(C3CC3)on2)CC1	IC50	'='	1233	nM	5.91		877227	UO_0000065	9.92	0.23	3.64	4.42	0	CHEMBL5734901	SMYD3 Biochemical Assay: The assays were all performed in a buffer consisting of 25 mM Tris-Cl pH 8.0
CHEMBL5818744		None	371.46	0	1.11	BDBM432557	COCCS(=O)(=O)N1CC[C@@H](NC(=O)c2cc(C3CC3)on2)C[C@H]1C	IC50	'='	9291	nM	5.03		877440	UO_0000065	13.55	0.27	3.92	4.95	0	CHEMBL5734901	SMYD3 Biochemical Assay: The assays were all performed in a buffer consisting of 25 mM Tris-Cl pH 8.0
CHEMBL5817744		None	305.42	0	2.84	BDBM293360	CC(C)CN[C@H]1CC[C@H](NC(=O)c2cc(C3CC3)on2)CC1	IC50	'='	2563	nM	5.59		559177	UO_0000065	18.31	0.35	2.75	8.33	0	CHEMBL5731515	SMYD3 Biochemical Assay: S-adenosylmethionine (SAM)
CHEMBL5845175		None	319.45	0	3.23	BDBM293361	CC(C)CCN[C@H]1CC[C@H](NC(=O)c2cc(C3CC3)on2)CC1	IC50	'='	8235	nM	5.08		559178	UO_0000065	15.92	0.3	1.85	7.57	0	CHEMBL5731515	SMYD3 Biochemical Assay: S-adenosylmethionine (SAM)
CHEMBL5932380		None	348.45	0	1.79	BDBM293393	C[C@H](N)CC(=O)N[C@H]1CC[C@@H](N(C)C(=O)c2cc(C3CC3)on2)CC1	IC50	'='	25800	nM	4.59		559210	UO_0000065	13.17	0.25	2.8	4.52	0	CHEMBL5731515	SMYD3 Biochemical Assay: S-adenosylmethionine (SAM)
CHEMBL5814050		None	346.43	0	1.45	BDBM293346	N[C@H]1C[C@@H](C(=O)N[C@H]2CC[C@H](NC(=O)c3cc(C4CC4)on3)CC2)C1	IC50	'='	1182	nM	5.93		559167	UO_0000065	17.11	0.32	4.48	5.38	0	CHEMBL5731515	SMYD3 Biochemical Assay: S-adenosylmethionine (SAM)
CHEMBL5439323		None	311.77	0	1.51	BDBM321290	O=C(NC1CCN(C(=O)CCl)CC1)c1cc(C2CC2)on1	IC50	'='	33495	nM	4.47		912547	UO_0000065	14.35	0.29	2.97	5.93	1	CHEMBL5735277	SMYD3 Enzyme Assays on MEKK2 Protein Substrate : The assays were an performed in a buffer consisting of 25 mM Tris-Cl pH 8.0
CHEMBL5633498		None	340.43	0	0.65	20	NC1CCN(c2ncnc3cc(C(=O)NC4CCNC4)ccc23)CC1	IC50	'='	60000	nM	4.22			UO_0000065	12.4	0.23	3.57	4.39	0	CHEMBL5628408	Displacement of 3H-SAM from SMYD3 (unknown origin) using biotinylated-MAP3K2 as substrate incubated for 45 mins by SPA assay	B	BAO_0000357	single protein format	Homo sapiens	None	None	None	None				CHEMBL2321643	Histone-lysine N-methyltransferase SMYD3	Homo sapiens	SINGLE PROTEIN	CHEMBL5625232	1	Scientific Literature	Eur J Med Chem	2023	None	TIME = 0.75 hr	INHIBITOR		60
CHEMBL4588080		None	410.54	0	1.56	5	O=C(NC1CCN(S(=O)(=O)CCCN2CCCC2)CC1)c1cc(C2CC2)on1	IC50	'='	126	nM	6.9			UO_0000065	16.81	0.34	5.34	7.21	0	CHEMBL4338950	Inhibition of recombinant N-terminal FLAG/His-tagged SMYD3 (unknown origin) expressed in baculovirus infected insect cells using 3H-SAM as substrate assessed as 3H-MEKK2 methylation incubated for 40 mins by scintillation proximity assay	B	BAO_0000219	cell-based format	Homo sapiens	None	None	None	None				CHEMBL2321643	Histone-lysine N-methyltransferase SMYD3	Homo sapiens	SINGLE PROTEIN	CHEMBL4334548	1	Scientific Literature	ACS Med Chem Lett	2020	None				126
CHEMBL4476582		None	444.56	0	2.34	16	O=C(NC1CCN(S(=O)(=O)c2ccc(CN3CCC3)cc2)CC1)c1cc(C2CC2)on1	IC50	'='	20	nM	7.7			UO_0000065	17.32	0.34	5.36	8.04	0	CHEMBL4338950	Inhibition of recombinant N-terminal FLAG/His-tagged SMYD3 (unknown origin) expressed in baculovirus infected insect cells using 3H-SAM as substrate assessed as 3H-MEKK2 methylation incubated for 40 mins by scintillation proximity assay	B	BAO_0000219	cell-based format	Homo sapiens	None	None	None	None				CHEMBL2321643	Histone-lysine N-methyltransferase SMYD3	Homo sapiens	SINGLE PROTEIN	CHEMBL4334548	1	Scientific Literature	ACS Med Chem Lett	2020	None				20
CHEMBL4578574		None	494.7	0	3.66	26	CC(C)(C)CCN[C@H]1CC[C@H](CS(=O)(=O)N2CCC(NC(=O)c3cc(C4CC4)on3)CC2)CC1	IC50	'='	20	nM	7.7			UO_0000065	15.56	0.31	4.04	7.36	0	CHEMBL4338950	Inhibition of recombinant N-terminal FLAG/His-tagged SMYD3 (unknown origin) expressed in baculovirus infected insect cells using 3H-SAM as substrate assessed as 3H-MEKK2 methylation incubated for 40 mins by scintillation proximity assay	B	BAO_0000219	cell-based format	Homo sapiens	None	None	None	None				CHEMBL2321643	Histone-lysine N-methyltransferase SMYD3	Homo sapiens	SINGLE PROTEIN	CHEMBL4334548	1	Scientific Literature	ACS Med Chem Lett	2020	None				20
CHEMBL4532881		None	514.69	1	3.73	40	Cc1ccccc1CN[C@H]1CC[C@H](CS(=O)(=O)N2CCC(NC(=O)c3cc(C4CC4)on3)CC2)CC1	IC50	'<'	1	nM				UO_0000065					0	CHEMBL4338950	Inhibition of recombinant N-terminal FLAG/His-tagged SMYD3 (unknown origin) expressed in baculovirus infected insect cells using 3H-SAM as substrate assessed as 3H-MEKK2 methylation incubated for 40 mins by scintillation proximity assay	B	BAO_0000219	cell-based format	Homo sapiens	None	None	None	None				CHEMBL2321643	Histone-lysine N-methyltransferase SMYD3	Homo sapiens	SINGLE PROTEIN	CHEMBL4334548	1	Scientific Literature	ACS Med Chem Lett	2020	None				1
CHEMBL4551287		None	519.64	1	2.96	47	O=C(NC1CCN(S(=O)(=O)C[C@H]2CC[C@H](NCc3cncc(F)c3)CC2)CC1)c1cc(C2CC2)on1	IC50	'<'	1	nM				UO_0000065					0	CHEMBL4338950	Inhibition of recombinant N-terminal FLAG/His-tagged SMYD3 (unknown origin) expressed in baculovirus infected insect cells using 3H-SAM as substrate assessed as 3H-MEKK2 methylation incubated for 40 mins by scintillation proximity assay	B	BAO_0000219	cell-based format	Homo sapiens	None	None	None	None				CHEMBL2321643	Histone-lysine N-methyltransferase SMYD3	Homo sapiens	SINGLE PROTEIN	CHEMBL4334548	1	Scientific Literature	ACS Med Chem Lett	2020	None				1
CHEMBL5861525		None	424.55	0	3.01	BDBM293378	NCCC(=O)N[C@H]1CC[C@H](N(CCc2ccccc2)C(=O)c2cc(C3CC3)on2)CC1	IC50	'='	10770	nM	4.97		559195	UO_0000065	11.7	0.22	1.96	4.9	0	CHEMBL5731515	SMYD3 Biochemical Assay: S-adenosylmethionine (SAM)
CHEMBL5848959		None	364.45	0	0.76	BDBM293388	NCCC(=O)N[C@H]1CC[C@H](N(CCO)C(=O)c2cc(C3CC3)on2)CC1	IC50	'='	16790	nM	4.78		559205	UO_0000065	13.1	0.25	4.01	3.92	0	CHEMBL5731515	SMYD3 Biochemical Assay: S-adenosylmethionine (SAM)
CHEMBL5859783		None	348.45	0	1.79	BDBM293392	C[C@@H](N)CC(=O)N[C@H]1CC[C@H](N(C)C(=O)c2cc(C3CC3)on2)CC1	IC50	'='	9280	nM	5.03		559209	UO_0000065	14.44	0.27	3.24	4.96	0	CHEMBL5731515	SMYD3 Biochemical Assay: S-adenosylmethionine (SAM)
CHEMBL6044210		None	410.52	0	3.17	BDBM432667	C[C@H]1C[C@@H](NC(=O)c2cc(C3CC3)on2)CCN1C(=O)c1cccc(C(C)(C)N)c1	IC50	'='	4288	nM	5.37		877550	UO_0000065	13.08	0.24	2.2	5.29	0	CHEMBL5734901	SMYD3 Biochemical Assay: The assays were all performed in a buffer consisting of 25 mM Tris-Cl pH 8.0
CHEMBL5798686		None	446.53	0	2.48	BDBM432697	CC(=O)Nc1ccc(S(=O)(=O)N2CC[C@H](NC(=O)c3cc(C4CC4)on3)C[C@H]2C)cc1	IC50	'>'	10000	nM			877580	UO_0000065					0	CHEMBL5734901	SMYD3 Biochemical Assay: The assays were all performed in a buffer consisting of 25 mM Tris-Cl pH 8.0
CHEMBL5885708		None	386.5	0	2.05	BDBM432479	C[C@H]1CC(NC(=O)c2cc(C3CC3)on2)CCN1C(=O)C1CC2(CCNC2)C1	IC50	'='	2023	nM	5.69		877362	UO_0000065	14.73	0.28	3.64	6.51	0	CHEMBL5734901	SMYD3 Biochemical Assay: The assays were all performed in a buffer consisting of 25 mM Tris-Cl pH 8.0
CHEMBL5773222		None	320.39	0	0.6	BDBM378223	COc1cccc(C(=O)N[C@H]2CC[C@H](NC(=O)CCN)CC2)n1	IC50	'>'	100000	nM			756229	UO_0000065					0	CHEMBL5733491	SMYD3 Biochemical Assay: The assays were all performed in a buffer consisting of 25 mM Tris-Cl pH 8.0
CHEMBL5993029		None	276.34	0	1.04	BDBM378313	CC(=O)Nc1ccc(C(=O)N[C@H]2CC[C@H](N)CC2)nc1	IC50	'>'	100000	nM			756319	UO_0000065					0	CHEMBL5733491	SMYD3 Biochemical Assay: The assays were all performed in a buffer consisting of 25 mM Tris-Cl pH 8.0
CHEMBL6020347		None	380.47	0	0.24	BDBM378318	NCCC(=O)N[C@H]1CC[C@H](NS(=O)(=O)c2ccc3c(c2)CC(=O)N3)CC1	IC50	'>'	100000	nM			756324	UO_0000065					0	CHEMBL5733491	SMYD3 Biochemical Assay: The assays were all performed in a buffer consisting of 25 mM Tris-Cl pH 8.0
CHEMBL6025100		None	237.28	0	1.22	BDBM378258	N[C@H]1CC[C@H](NC(=O)c2cccc(F)n2)CC1	IC50	'>'	100000	nM			756264	UO_0000065					0	CHEMBL5733491	SMYD3 Biochemical Assay: The assays were all performed in a buffer consisting of 25 mM Tris-Cl pH 8.0
CHEMBL5863902		None	353.41	0	1.6	BDBM378183	CC(NC(=O)Cc1cc(F)cc(F)c1)C1CCN(C(=O)[C@H](C)N)CC1	IC50	'='	70710	nM	4.15		756189	UO_0000065	11.74	0.23	2.55	5.5	0	CHEMBL5733491	SMYD3 Biochemical Assay: The assays were all performed in a buffer consisting of 25 mM Tris-Cl pH 8.0
CHEMBL5943033		None	307.4	0	-0.03	BDBM378186	CC(NC(=O)Cn1ccnc1)C1CCN(C(=O)[C@H](C)N)CC1	IC50	'>'	100000	nM			756192	UO_0000065					0	CHEMBL5733491	SMYD3 Biochemical Assay: The assays were all performed in a buffer consisting of 25 mM Tris-Cl pH 8.0
CHEMBL5766785		None	335.43	0	0.9	BDBM378187	NCCC(=O)N[C@H]1CC[C@H](NC(=O)c2cn3ccsc3n2)CC1	IC50	'>'	100000	nM			756193	UO_0000065					0	CHEMBL5733491	SMYD3 Biochemical Assay: The assays were all performed in a buffer consisting of 25 mM Tris-Cl pH 8.0
CHEMBL5831030		None	264.35	0	1.4	BDBM378188	N[C@H]1CC[C@H](NC(=O)c2cn3ccsc3n2)CC1	IC50	'>'	100000	nM			756195	UO_0000065					0	CHEMBL5733491	SMYD3 Biochemical Assay: The assays were all performed in a buffer consisting of 25 mM Tris-Cl pH 8.0
CHEMBL5764443		None	396.49	0	2.09	BDBM432313	NC[C@H](Cc1ccccc1)C(=O)N1CCC(NC(=O)c2cc(C3CC3)on2)CC1	IC50	'='	2411	nM	5.62		877197	UO_0000065	14.17	0.26	3.53	5.54	0	CHEMBL5734901	SMYD3 Biochemical Assay: The assays were all performed in a buffer consisting of 25 mM Tris-Cl pH 8.0
CHEMBL5796067		None	388.51	0	2.3	BDBM432606	C[C@@H]1C[C@H](NC(=O)c2cc(C3CC3)on2)CCN1C(=O)[C@H](C)C1CCNCC1	IC50	'='	852	nM	6.07		877489	UO_0000065	15.62	0.3	3.77	6.94	0	CHEMBL5734901	SMYD3 Biochemical Assay: The assays were all performed in a buffer consisting of 25 mM Tris-Cl pH 8.0
CHEMBL6003374		None	362.47	0	2.04	BDBM432612	C[C@@H]1C[C@H](NC(=O)c2cc(C3CC3)on2)CCN1C(=O)CC(C)(C)CN	IC50	'='	416	nM	6.38		877495	UO_0000065	17.6	0.34	4.34	6.29	0	CHEMBL5734901	SMYD3 Biochemical Assay: The assays were all performed in a buffer consisting of 25 mM Tris-Cl pH 8.0
CHEMBL5821614		None	399.47	0	1.03	BDBM432620	CCOC(=O)CS(=O)(=O)N1CC[C@H](NC(=O)c2cc(C3CC3)on2)C[C@H]1C	IC50	'>'	10000	nM			877503	UO_0000065					0	CHEMBL5734901	SMYD3 Biochemical Assay: The assays were all performed in a buffer consisting of 25 mM Tris-Cl pH 8.0
CHEMBL5913384		None	355.46	0	1.87	BDBM432622	CCCS(=O)(=O)N1CC[C@@H](NC(=O)c2cc(C3CC3)on2)C[C@@H]1C	IC50	'>'	10000	nM			877505	UO_0000065					0	CHEMBL5734901	SMYD3 Biochemical Assay: The assays were all performed in a buffer consisting of 25 mM Tris-Cl pH 8.0
CHEMBL5942540		None	531.65	1	2.92	BDBM433144	O=C(N[C@H]1C[C@H]2CC[C@@H](C1)N2S(=O)(=O)N1CCC(NCc2ccc(F)cc2)CC1)c1cc(C2CC2)on1	IC50	'='	5.73	nM	8.24		878027	UO_0000065	15.5	0.3	5.32	7.65	0	CHEMBL5734901	SMYD3 Biochemical Assay: The assays were all performed in a buffer consisting of 25 mM Tris-Cl pH 8.0
CHEMBL5844112		None	548.71	1	1	BDBM433262	O=C(N[C@H]1C[C@H]2CC[C@@H](C1)N2S(=O)(=O)N1CC2CCC(C1)N2CCN1CCOCC1)c1cc(C2CC2)on1	IC50	'='	87	nM	7.06		878145	UO_0000065	12.87	0.25	6.06	6.33	0	CHEMBL5734901	SMYD3 Biochemical Assay: The assays were all performed in a buffer consisting of 25 mM Tris-Cl pH 8.0
CHEMBL5849538		None	474.63	0	2.89	BDBM432978	C[C@@H]1CN(S(=O)(=O)CCCNCc2ccccc2)[C@H](C)C[C@@H]1NC(=O)c1cc(C2CC2)on1	IC50	'='	120	nM	6.92		877861	UO_0000065	14.58	0.29	4.03	6.62	0	CHEMBL5734901	SMYD3 Biochemical Assay: The assays were all performed in a buffer consisting of 25 mM Tris-Cl pH 8.0
CHEMBL5744323		None	438.55	0	0.67	BDBM432987	O=C(N[C@H]1C[C@H]2CC[C@@H](C1)N2S(=O)(=O)CCN1CCC(O)C1)c1cc(C2CC2)on1	IC50	'='	138	nM	6.86		877870	UO_0000065	15.64	0.31	6.19	5.91	0	CHEMBL5734901	SMYD3 Biochemical Assay: The assays were all performed in a buffer consisting of 25 mM Tris-Cl pH 8.0
CHEMBL5775155		None	521.73	1	2.52	BDBM432990	C[C@H]1CN(S(=O)(=O)CC2CCN(CCN3CCCCC3)CC2)CC[C@H]1NC(=O)c1cc(C2CC2)on1	IC50	'='	156	nM	6.81		877873	UO_0000065	13.05	0.26	4.29	6.88	0	CHEMBL5734901	SMYD3 Biochemical Assay: The assays were all performed in a buffer consisting of 25 mM Tris-Cl pH 8.0
CHEMBL5909165		None	424.57	0	1.98	BDBM433115	C[C@H]1C[C@@H](NC(=O)c2cc(C3CC3)on2)CCN1S(=O)(=O)C[C@@H]1CCC[C@@H](N)C1	IC50	'='	3.2	nM	8.49		877998	UO_0000065	20.01	0.4	6.51	7.17	0	CHEMBL5734901	SMYD3 Biochemical Assay: The assays were all performed in a buffer consisting of 25 mM Tris-Cl pH 8.0
CHEMBL5925585		None	481.62	0	0.91	BDBM433116	CN(CCO)C1CCN(S(=O)(=O)N2[C@@H]3CC[C@H]2C[C@@H](NC(=O)c2cc(C4CC4)on2)C3)CC1	IC50	'='	3.27	nM	8.48		877999	UO_0000065	17.62	0.35	7.58	7.12	0	CHEMBL5734901	SMYD3 Biochemical Assay: The assays were all performed in a buffer consisting of 25 mM Tris-Cl pH 8.0
CHEMBL5850056		None	250.35	0	0.98	BDBM377906	CCc1cc(C(=O)N[C@H]2CC[C@H](N)CC2)n(C)n1	IC50	'='	59910	nM	4.22		755918	UO_0000065	16.87	0.32	3.24	5.79	0	CHEMBL5733491	SMYD3 Biochemical Assay: The assays were all performed in a buffer consisting of 25 mM Tris-Cl pH 8.0
CHEMBL5750894		None	237.31	0	0	BDBM377917	Cn1nc(N)cc1C(=O)N[C@H]1CC[C@H](N)CC1	IC50	'='	117120	nM		Outside typical range	755928	UO_0000065					0	CHEMBL5733491	SMYD3 Biochemical Assay: The assays were all performed in a buffer consisting of 25 mM Tris-Cl pH 8.0
CHEMBL5978751		None	271.32	0	2.32	BDBM377922	CCC(=O)c1c[nH]c(C(=O)Nc2ccc(CN)cc2)c1	IC50	'='	107670	nM		Outside typical range	755932	UO_0000065					0	CHEMBL5733491	SMYD3 Biochemical Assay: The assays were all performed in a buffer consisting of 25 mM Tris-Cl pH 8.0
CHEMBL5954979		None	328.48	0	3.78	BDBM377925	CCc1ccc(C(=O)NC(c2ccccc2)C2CCNCC2)s1	IC50	'='	116270	nM		Outside typical range	755935	UO_0000065					0	CHEMBL5733491	SMYD3 Biochemical Assay: The assays were all performed in a buffer consisting of 25 mM Tris-Cl pH 8.0
CHEMBL5865672		None	296.39	0	1.09	BDBM378023	CS(=O)(=O)c1cccc(C(=O)N[C@H]2CC[C@H](N)CC2)c1	IC50	'>'	100000	nM			756029	UO_0000065					0	CHEMBL5733491	SMYD3 Biochemical Assay: The assays were all performed in a buffer consisting of 25 mM Tris-Cl pH 8.0
CHEMBL5849576		None	235.29	0	0.06	BDBM378025	Nc1nccnc1C(=O)N[C@H]1CC[C@H](N)CC1	IC50	'>'	100000	nM			756031	UO_0000065					0	CHEMBL5733491	SMYD3 Biochemical Assay: The assays were all performed in a buffer consisting of 25 mM Tris-Cl pH 8.0
CHEMBL3797585		None	414.92	0	0.71	3	NCCCS(=O)(=O)N1CCC(NC(=O)c2cc3c(cc2Cl)NC(=O)C3)CC1	IC50	'='	80	nM	7.1			UO_0000065	17.1	0.36	6.39	5.84	0	CHEMBL3803119	Inhibition of full length N-terminal His-tagged SMYD3 (1 to 428 residues) (unknown origin) expressed in Escherichia coli using N-terminal GST-tagged MEKK2 as substrate preincubated for 30 mins followed by substrate addition by scintillation proximity assay in presence of [3H]SAM	B	BAO_0000019	assay format	Homo sapiens	None	None	None	None				CHEMBL2321643	Histone-lysine N-methyltransferase SMYD3	Homo sapiens	SINGLE PROTEIN	CHEMBL3797202	1	Scientific Literature	ACS Med Chem Lett	2016	None				80
CHEMBL3797419		None	380.47	0	0.05	2	NCCCS(=O)(=O)N1CCC(NC(=O)c2ccc3c(c2)CC(=O)N3)CC1	IC50	'='	160	nM	6.8			UO_0000065	17.86	0.36	6.75	5.59	0	CHEMBL3803119	Inhibition of full length N-terminal His-tagged SMYD3 (1 to 428 residues) (unknown origin) expressed in Escherichia coli using N-terminal GST-tagged MEKK2 as substrate preincubated for 30 mins followed by substrate addition by scintillation proximity assay in presence of [3H]SAM	B	BAO_0000019	assay format	Homo sapiens	None	None	None	None				CHEMBL2321643	Histone-lysine N-methyltransferase SMYD3	Homo sapiens	SINGLE PROTEIN	CHEMBL3797202	1	Scientific Literature	ACS Med Chem Lett	2016	None				160
CHEMBL5816651		None	403.46	0	1.02	BDBM377874	CC(=O)Nc1ccc(S(=O)(=O)N2CCC(NC(=O)c3cnccn3)CC2)cc1	IC50	'>'	100000	nM			755886	UO_0000065					0	CHEMBL5733491	SMYD3 Biochemical Assay: The assays were all performed in a buffer consisting of 25 mM Tris-Cl pH 8.0
CHEMBL5897757		None	609.51	1	2.66	BDBM432345	C[C@@H](N)CC(=O)NC[C@@H](Cc1ccc(O)c(I)c1)C(=O)N1CCC(NCc2cc(C3CC3)on2)CC1	IC50	'='	13802	nM	4.86		877228	UO_0000065	7.97	0.18	2.2	3.63	0	CHEMBL5734901	SMYD3 Biochemical Assay: The assays were all performed in a buffer consisting of 25 mM Tris-Cl pH 8.0
CHEMBL5796274		None	412.49	0	1.79	BDBM432368	C[C@H]1CN(C(=O)[C@@H](N)Cc2ccc(O)cc2)CCC1NC(=O)c1cc(C2CC2)on1	IC50	'='	2324	nM	5.63		877251	UO_0000065	13.66	0.26	3.84	4.63	0	CHEMBL5734901	SMYD3 Biochemical Assay: The assays were all performed in a buffer consisting of 25 mM Tris-Cl pH 8.0
CHEMBL5753092		None	412.49	0	1.79	BDBM432369	C[C@@H]1CN(C(=O)[C@@H](N)Cc2ccc(O)cc2)CCC1NC(=O)c1cc(C2CC2)on1	IC50	'='	1688	nM	5.77		877252	UO_0000065	13.99	0.26	3.98	4.74	0	CHEMBL5734901	SMYD3 Biochemical Assay: The assays were all performed in a buffer consisting of 25 mM Tris-Cl pH 8.0
CHEMBL6021326		None	400.52	0	2.71	BDBM432374	N[C@H]1CC[C@H](C(=O)N2C3CCCC2CC(NC(=O)c2cc(C4CC4)on2)C3)CC1	IC50	'='	5346	nM	5.27		877257	UO_0000065	13.16	0.25	2.56	5.2	0	CHEMBL5734901	SMYD3 Biochemical Assay: The assays were all performed in a buffer consisting of 25 mM Tris-Cl pH 8.0
CHEMBL5824660		None	454.57	0	2.92	BDBM432413	CC(C)c1cc(C[C@H](CN)C(=O)N2CCC(NC(=O)c3cc(C4CC4)on3)CC2)ccc1O	IC50	'='	1093	nM	5.96		877296	UO_0000065	13.11	0.25	3.04	4.9	0	CHEMBL5734901	SMYD3 Biochemical Assay: The assays were all performed in a buffer consisting of 25 mM Tris-Cl pH 8.0
CHEMBL6039542		None	438.59	0	2.19	BDBM433252	C[C@H]1CN(S(=O)(=O)[C@H]2CC[C@@H](N(C)C)CC2)CC[C@H]1NC(=O)c1cc(C2CC2)on1	IC50	'='	69	nM	7.16		878135	UO_0000065	16.33	0.33	4.97	7.48	0	CHEMBL5734901	SMYD3 Biochemical Assay: The assays were all performed in a buffer consisting of 25 mM Tris-Cl pH 8.0
CHEMBL5866399		None	473.6	0	2.03	BDBM433255	C[C@H]1C[C@@H](NC(=O)c2cc(C3CC3)on2)CCN1S(=O)(=O)N1CCNC[C@H]1c1ccccc1	IC50	'='	80.6	nM	7.09		878138	UO_0000065	14.98	0.29	5.06	6.58	0	CHEMBL5734901	SMYD3 Biochemical Assay: The assays were all performed in a buffer consisting of 25 mM Tris-Cl pH 8.0
CHEMBL5986529		None	438.59	0	2.19	BDBM433133	C[C@H]1CN(S(=O)(=O)[C@H]2CC[C@H](N(C)C)CC2)CC[C@H]1NC(=O)c1cc(C2CC2)on1	IC50	'='	4.82	nM	8.32		878016	UO_0000065	18.96	0.38	6.13	8.69	0	CHEMBL5734901	SMYD3 Biochemical Assay: The assays were all performed in a buffer consisting of 25 mM Tris-Cl pH 8.0
CHEMBL5802724		None	449.58	0	1.35	BDBM433145	O=C(N[C@H]1C[C@H]2CC[C@@H](C1)N2S(=O)(=O)N1CCC2(CCN2)CC1)c1cc(C2CC2)on1	IC50	'='	5.95	nM	8.22		878028	UO_0000065	18.3	0.36	6.88	7.63	0	CHEMBL5734901	SMYD3 Biochemical Assay: The assays were all performed in a buffer consisting of 25 mM Tris-Cl pH 8.0
CHEMBL6000335		None	410.54	0	1.46	BDBM433150	C[C@H]1C[C@@H](NC(=O)c2cc(C3CC3)on2)CCN1S(=O)(=O)C[C@H]1CCCNC1	IC50	'='	6.92	nM	8.16		878033	UO_0000065	19.88	0.4	6.7	7.81	0	CHEMBL5734901	SMYD3 Biochemical Assay: The assays were all performed in a buffer consisting of 25 mM Tris-Cl pH 8.0
CHEMBL6011599		None	435.55	0	0.96	BDBM433151	O=C(N[C@H]1C[C@H]2CC[C@@H](C1)N2S(=O)(=O)N1CC2CCC1CN2)c1cc(C2CC2)on1	IC50	'='	7.06	nM	8.15		878034	UO_0000065	18.71	0.37	7.19	7.56	0	CHEMBL5734901	SMYD3 Biochemical Assay: The assays were all performed in a buffer consisting of 25 mM Tris-Cl pH 8.0
CHEMBL6004914		None	450.61	0	2.38	BDBM433153	CC1CC(CS(=O)(=O)N2[C@@H]3CC[C@H]2C[C@@H](NC(=O)c2cc(C4CC4)on2)C3)CC(C)N1	IC50	'='	7.09	nM	8.15		878036	UO_0000065	18.09	0.36	5.77	7.8	0	CHEMBL5734901	SMYD3 Biochemical Assay: The assays were all performed in a buffer consisting of 25 mM Tris-Cl pH 8.0
CHEMBL5871671		None	374.49	0	2.18	BDBM432475	C[C@@H]1CC(NC(=O)c2cc(C3CC3)on2)CCN1C(=O)[C@H]1CCC[C@H](N)C1	IC50	'='	728	nM	6.14		877358	UO_0000065	16.39	0.31	3.96	6.05	0	CHEMBL5734901	SMYD3 Biochemical Assay: The assays were all performed in a buffer consisting of 25 mM Tris-Cl pH 8.0
CHEMBL5793620		None	374.49	0	2.05	BDBM432477	C[C@H]1CC(NC(=O)c2cc(C3CC3)on2)CCN1C(=O)CCC1CCNC1	IC50	'='	624	nM	6.21		877360	UO_0000065	16.57	0.31	4.15	7.09	0	CHEMBL5734901	SMYD3 Biochemical Assay: The assays were all performed in a buffer consisting of 25 mM Tris-Cl pH 8.0
CHEMBL5750205		None	346.43	0	1.54	BDBM432500	NCCCC(=O)N1C2CCC1CC(NC(=O)c1cc(C3CC3)on1)C2	IC50	'='	678	nM	6.17		877383	UO_0000065	17.81	0.34	4.63	6.08	0	CHEMBL5734901	SMYD3 Biochemical Assay: The assays were all performed in a buffer consisting of 25 mM Tris-Cl pH 8.0
CHEMBL5879267		None	394.48	0	1.11	BDBM432502	C[C@@H]1CC(NC(=O)c2cc(C3CC3)on2)CCN1C(=O)C12C3C4C1C1C2C3C41N	IC50	'='	142	nM	6.85		877385	UO_0000065	17.36	0.32	5.74	6.75	0	CHEMBL5734901	SMYD3 Biochemical Assay: The assays were all performed in a buffer consisting of 25 mM Tris-Cl pH 8.0
CHEMBL6024419		None	374.49	0	2.18	BDBM432504	C[C@H]1CC(NC(=O)c2cc(C3CC3)on2)CCN1C(=O)CC1(CN)CCC1	IC50	'='	4680	nM	5.33		877387	UO_0000065	14.23	0.27	3.15	5.25	0	CHEMBL5734901	SMYD3 Biochemical Assay: The assays were all performed in a buffer consisting of 25 mM Tris-Cl pH 8.0
CHEMBL6002379		None	378.45	0	1.75	BDBM432507	C[C@H]1CC(NC(=O)c2cc(C3CC3)on2)CCN1C(=O)C1(F)CCNCC1	IC50	'='	2601	nM	5.58		877390	UO_0000065	14.76	0.28	3.83	6.38	0	CHEMBL5734901	SMYD3 Biochemical Assay: The assays were all performed in a buffer consisting of 25 mM Tris-Cl pH 8.0
CHEMBL5959042		None	370.48	0	0.81	BDBM432518	CC1(NC(=O)c2cc(C3CC3)on2)CCN(S(=O)(=O)CCCN)CC1	IC50	'='	230	nM	6.64		877401	UO_0000065	17.92	0.36	5.83	5.6	0	CHEMBL5734901	SMYD3 Biochemical Assay: The assays were all performed in a buffer consisting of 25 mM Tris-Cl pH 8.0
CHEMBL5794344		None	399.47	0	1.03	BDBM432531	CCOC(=O)CS(=O)(=O)N1CC[C@H](NC(=O)c2cc(C3CC3)on2)C[C@@H]1C	IC50	'='	1168	nM	5.93		877414	UO_0000065	14.85	0.3	4.9	4.99	0	CHEMBL5734901	SMYD3 Biochemical Assay: The assays were all performed in a buffer consisting of 25 mM Tris-Cl pH 8.0
CHEMBL5931478		None	417.53	0	2.71	BDBM432530	C[C@H]1C[C@@H](NC(=O)c2cc(C3CC3)on2)CCN1S(=O)(=O)CCc1ccccc1	IC50	'='	1333	nM	5.88		877418	UO_0000065	14.07	0.28	3.17	6.35	0	CHEMBL5734901	SMYD3 Biochemical Assay: The assays were all performed in a buffer consisting of 25 mM Tris-Cl pH 8.0
CHEMBL5801645		None	369.49	0	2.12	BDBM432539	CC(C)CS(=O)(=O)N1CC[C@H](NC(=O)c2cc(C3CC3)on2)C[C@H]1C	IC50	'>'	10000	nM			877422	UO_0000065					0	CHEMBL5734901	SMYD3 Biochemical Assay: The assays were all performed in a buffer consisting of 25 mM Tris-Cl pH 8.0
CHEMBL5779719		None	409.43	0	2.42	BDBM432558	C[C@@H]1C[C@H](NC(=O)c2cc(C3CC3)on2)CCN1S(=O)(=O)CCC(F)(F)F	IC50	'='	8372	nM	5.08		877441	UO_0000065	12.4	0.26	2.66	5.49	0	CHEMBL5734901	SMYD3 Biochemical Assay: The assays were all performed in a buffer consisting of 25 mM Tris-Cl pH 8.0
CHEMBL6024400		None	346.43	0	1.4	BDBM432565	NCCCC(=O)N1CC2CCC1CC2NC(=O)c1cc(C2CC2)on1	IC50	'='	5446	nM	5.26		877448	UO_0000065	15.19	0.29	3.86	5.19	0	CHEMBL5734901	SMYD3 Biochemical Assay: The assays were all performed in a buffer consisting of 25 mM Tris-Cl pH 8.0
CHEMBL5789575		None	362.47	0	2.04	BDBM432568	C[C@@H]1C[C@@H](NC(=O)c2cc(C3CC3)on2)CCN1C(=O)CC(C)(C)CN	IC50	'='	3155	nM	5.5		877451	UO_0000065	15.18	0.29	3.46	5.42	0	CHEMBL5734901	SMYD3 Biochemical Assay: The assays were all performed in a buffer consisting of 25 mM Tris-Cl pH 8.0
CHEMBL5976923		None	424.55	0	2.87	BDBM432572	C[C@@H]1C[C@H](NC(=O)c2cc(C3CC3)on2)CCN1C(=O)CC(CN)Cc1ccccc1	IC50	'>'	10000	nM			877455	UO_0000065					0	CHEMBL5734901	SMYD3 Biochemical Assay: The assays were all performed in a buffer consisting of 25 mM Tris-Cl pH 8.0
CHEMBL5820048		None	424.91	0	2.57	BDBM432587	C[C@H]1C[C@H](NC(=O)c2cc(C3CC3)on2)CCN1S(=O)(=O)c1ccc(Cl)nc1	IC50	'>'	10000	nM			877470	UO_0000065					0	CHEMBL5734901	SMYD3 Biochemical Assay: The assays were all performed in a buffer consisting of 25 mM Tris-Cl pH 8.0
CHEMBL5859226		None	342.42	0	0.6	BDBM432589	CNS(=O)(=O)N1CC[C@@H](NC(=O)c2cc(C3CC3)on2)C[C@@H]1C	IC50	'>'	10000	nM			877472	UO_0000065					0	CHEMBL5734901	SMYD3 Biochemical Assay: The assays were all performed in a buffer consisting of 25 mM Tris-Cl pH 8.0
CHEMBL6051960		None	479.65	0	2.33	BDBM433158	CCCN(C)C1CCN(S(=O)(=O)N2[C@@H]3CC[C@H]2C[C@@H](NC(=O)c2cc(C4CC4)on2)C3)CC1	IC50	'='	7.69	nM	8.11		878041	UO_0000065	16.92	0.34	5.78	8.2	0	CHEMBL5734901	SMYD3 Biochemical Assay: The assays were all performed in a buffer consisting of 25 mM Tris-Cl pH 8.0
CHEMBL5942113		None	435.55	0	0.91	BDBM433160	CN1CC2CC1CN2S(=O)(=O)N1[C@@H]2CC[C@H]1C[C@@H](NC(=O)c1cc(C3CC3)on1)C2	IC50	'='	8.22	nM	8.09		878043	UO_0000065	18.56	0.37	7.18	8.17	0	CHEMBL5734901	SMYD3 Biochemical Assay: The assays were all performed in a buffer consisting of 25 mM Tris-Cl pH 8.0
CHEMBL5935343		None	257.34	0	2.17	BDBM378161	N[C@H]1CC[C@H](NC(=O)c2cccc3[nH]ccc23)CC1	IC50	'>'	100000	nM			756167	UO_0000065					0	CHEMBL5733491	SMYD3 Biochemical Assay: The assays were all performed in a buffer consisting of 25 mM Tris-Cl pH 8.0
CHEMBL5992339		None	348.45	0	0.7	BDBM378145	Cc1cc(C)c(C(=O)NC(C)C2CCN(C(=O)[C@H](C)N)CC2)c(=O)[nH]1	IC50	'>'	100000	nM			756151	UO_0000065					0	CHEMBL5733491	SMYD3 Biochemical Assay: The assays were all performed in a buffer consisting of 25 mM Tris-Cl pH 8.0
CHEMBL5973627		None	298.39	0	2.85	BDBM378147	COc1ccc2cc(C(=O)N[C@H]3CC[C@H](N)CC3)ccc2c1	IC50	'>'	100000	nM			756153	UO_0000065					0	CHEMBL5733491	SMYD3 Biochemical Assay: The assays were all performed in a buffer consisting of 25 mM Tris-Cl pH 8.0
CHEMBL5797603		None	342.44	0	1.87	BDBM378153	CC(NC(=O)c1ccc2[nH]ccc2c1)C1CCN(C(=O)[C@H](C)N)CC1	IC50	'>'	100000	nM			756159	UO_0000065					0	CHEMBL5733491	SMYD3 Biochemical Assay: The assays were all performed in a buffer consisting of 25 mM Tris-Cl pH 8.0
CHEMBL5963039		None	305.38	0	0.17	BDBM378158	NCCC(=O)N[C@H]1CC[C@H](NC(=O)c2cnccc2N)CC1	IC50	'>'	100000	nM			756164	UO_0000065					0	CHEMBL5733491	SMYD3 Biochemical Assay: The assays were all performed in a buffer consisting of 25 mM Tris-Cl pH 8.0
CHEMBL5794414		None	344.42	0	0.69	BDBM378299	NCCC(=O)N[C@H]1CC[C@H](NC(=O)c2cccc3c2CC(=O)N3)CC1	IC50	'>'	100000	nM			756305	UO_0000065					0	CHEMBL5733491	SMYD3 Biochemical Assay: The assays were all performed in a buffer consisting of 25 mM Tris-Cl pH 8.0
CHEMBL5863380		None	414.35	0	1.72	BDBM378300	Cc1nn(C(C)C(=O)N[C@H]2CC[C@H](NC(=O)CCN)CC2)c(C)c1Br	IC50	'>'	100000	nM			756306	UO_0000065					0	CHEMBL5733491	SMYD3 Biochemical Assay: The assays were all performed in a buffer consisting of 25 mM Tris-Cl pH 8.0
CHEMBL5951232		None	369.37	0	1.51	BDBM378309	NCCC(=O)N[C@H]1CC[C@H](NC(=O)c2cccc3c2OC(F)(F)O3)CC1	IC50	'>'	100000	nM			756315	UO_0000065					0	CHEMBL5733491	SMYD3 Biochemical Assay: The assays were all performed in a buffer consisting of 25 mM Tris-Cl pH 8.0
CHEMBL6025674		None	298.39	0	2.13	BDBM378327	Cc1nc2ccccc2c(C(=O)N[C@H]2CC[C@H](N)CC2)c1N	IC50	'>'	100000	nM			756333	UO_0000065					0	CHEMBL5733491	SMYD3 Biochemical Assay: The assays were all performed in a buffer consisting of 25 mM Tris-Cl pH 8.0
CHEMBL5744512		None	305.38	0	0.17	BDBM378254	NCCC(=O)N[C@H]1CC[C@H](NC(=O)c2cccc(N)n2)CC1	IC50	'>'	100000	nM			756260	UO_0000065					0	CHEMBL5733491	SMYD3 Biochemical Assay: The assays were all performed in a buffer consisting of 25 mM Tris-Cl pH 8.0
CHEMBL5981798		None	234.3	0	0.66	BDBM378255	Nc1cccc(C(=O)N[C@H]2CC[C@H](N)CC2)n1	IC50	'>'	100000	nM			756261	UO_0000065					0	CHEMBL5733491	SMYD3 Biochemical Assay: The assays were all performed in a buffer consisting of 25 mM Tris-Cl pH 8.0
CHEMBL5842174		None	426.52	0	2.1	BDBM432340	Cc1ccc(C[C@@H](CN)C(=O)N2CCC(NC(=O)c3cc(C4CC4)on3)CC2)cc1O	IC50	'='	13980	nM	4.85		877223	UO_0000065	11.38	0.21	2.75	3.99	0	CHEMBL5734901	SMYD3 Biochemical Assay: The assays were all performed in a buffer consisting of 25 mM Tris-Cl pH 8.0
CHEMBL5878122		None	609.51	1	2.66	BDBM432346	C[C@@H](N)CC(=O)NC[C@H](Cc1ccc(O)c(I)c1)C(=O)N1CCC(NCc2cc(C3CC3)on2)CC1	IC50	'='	479	nM	6.32		877229	UO_0000065	10.37	0.24	3.66	4.73	0	CHEMBL5734901	SMYD3 Biochemical Assay: The assays were all performed in a buffer consisting of 25 mM Tris-Cl pH 8.0
CHEMBL5877819		None	374.49	0	2.05	BDBM432355	C[C@H]1C[C@@H](NC(=O)c2cc(C3CC3)on2)CCN1C(=O)CC1CCNCC1	IC50	'='	2077	nM	5.68		877238	UO_0000065	15.17	0.29	3.63	6.5	0	CHEMBL5734901	SMYD3 Biochemical Assay: The assays were all performed in a buffer consisting of 25 mM Tris-Cl pH 8.0
CHEMBL5964583		None	444.56	0	2.69	BDBM433226	C[C@H](N)c1ccc(S(=O)(=O)N2[C@@H]3CC[C@H]2C[C@@H](NC(=O)c2cc(C4CC4)on2)C3)cc1	IC50	'='	37.2	nM	7.43		878109	UO_0000065	16.71	0.33	4.74	6.27	0	CHEMBL5734901	SMYD3 Biochemical Assay: The assays were all performed in a buffer consisting of 25 mM Tris-Cl pH 8.0
CHEMBL6023336		None	545.68	1	3.48	BDBM433238	C[C@H](NC1CCN(S(=O)(=O)N2[C@@H]3CC[C@H]2C[C@@H](NC(=O)c2cc(C4CC4)on2)C3)CC1)c1ccc(F)cc1	IC50	'='	48.1	nM	7.32		878121	UO_0000065	13.41	0.26	3.84	6.79	0	CHEMBL5734901	SMYD3 Biochemical Assay: The assays were all performed in a buffer consisting of 25 mM Tris-Cl pH 8.0
CHEMBL5908038		None	472.61	0	2.44	BDBM433042	O=C(N[C@H]1CCN(S(=O)(=O)CC2CCCN2)[C@@H](Cc2ccccc2)C1)c1cc(C2CC2)on1	IC50	'='	533	nM	6.27		877925	UO_0000065	13.27	0.26	3.83	6	0	CHEMBL5734901	SMYD3 Biochemical Assay: The assays were all performed in a buffer consisting of 25 mM Tris-Cl pH 8.0
CHEMBL5998284		None	399.52	0	0.49	BDBM433089	CCc1cc(C(=O)N[C@H]2CCN(S(=O)(=O)N3CCC(N)CC3)[C@@H](C)C2)no1	IC50	'='	1.85	nM	8.73		877972	UO_0000065	21.86	0.44	8.24	7.17	0	CHEMBL5734901	SMYD3 Biochemical Assay: The assays were all performed in a buffer consisting of 25 mM Tris-Cl pH 8.0
CHEMBL6037573		None	411.53	0	0.63	BDBM433095	CCc1cc(C(=O)N[C@H]2C[C@H]3CC[C@@H](C2)N3S(=O)(=O)N2CCC(N)CC2)no1	IC50	'='	2.05	nM	8.69		877978	UO_0000065	21.11	0.42	8.06	7.13	0	CHEMBL5734901	SMYD3 Biochemical Assay: The assays were all performed in a buffer consisting of 25 mM Tris-Cl pH 8.0
CHEMBL5986451		None	515.68	1	2.83	BDBM433016	C[C@H]1CN(S(=O)(=O)N(C)C2CCN(Cc3ccccc3)CC2)CC[C@H]1NC(=O)c1cc(C2CC2)on1	IC50	'='	320	nM	6.5		877899	UO_0000065	12.59	0.25	3.66	6.56	0	CHEMBL5734901	SMYD3 Biochemical Assay: The assays were all performed in a buffer consisting of 25 mM Tris-Cl pH 8.0
CHEMBL6039217		None	422.55	0	1.61	BDBM433018	O=C(N[C@@H]1C[C@H]2CC[C@@H](C1)N2S(=O)(=O)CC1CCCNC1)c1cc(C2CC2)on1	IC50	'='	322	nM	6.49		877901	UO_0000065	15.36	0.31	4.88	6.21	0	CHEMBL5734901	SMYD3 Biochemical Assay: The assays were all performed in a buffer consisting of 25 mM Tris-Cl pH 8.0
CHEMBL5755004		None	485.61	0	2.17	BDBM433019	O=C(N[C@H]1C[C@H]2CC[C@@H](C1)N2S(=O)(=O)N1CCNC(c2ccccc2)C1)c1cc(C2CC2)on1	IC50	'='	326	nM	6.49		877902	UO_0000065	13.36	0.26	4.32	6.02	0	CHEMBL5734901	SMYD3 Biochemical Assay: The assays were all performed in a buffer consisting of 25 mM Tris-Cl pH 8.0
CHEMBL5954078		None	472.61	0	2.44	BDBM433022	O=C(N[C@H]1CCN(S(=O)(=O)C2CCCNC2)[C@@H](Cc2ccccc2)C1)c1cc(C2CC2)on1	IC50	'='	340	nM	6.47		877905	UO_0000065	13.69	0.27	4.03	6.19	0	CHEMBL5734901	SMYD3 Biochemical Assay: The assays were all performed in a buffer consisting of 25 mM Tris-Cl pH 8.0
CHEMBL5771843		None	368.46	0	0.81	BDBM433024	CNC/C=C/S(=O)(=O)N1CCC(NC(=O)c2cc(C3CC3)on2)CC1	IC50	'='	363	nM	6.44		877907	UO_0000065	17.48	0.35	5.63	6.16	0	CHEMBL5734901	SMYD3 Biochemical Assay: The assays were all performed in a buffer consisting of 25 mM Tris-Cl pH 8.0
CHEMBL6055338		None	495.65	0	0.87	BDBM433039	CN(CCN1CCOCC1)CCS(=O)(=O)N1[C@@H]2CC[C@H]1C[C@@H](NC(=O)c1cc(C3CC3)on1)C2	IC50	'='	513	nM	6.29		877922	UO_0000065	12.69	0.25	5.42	5.81	0	CHEMBL5734901	SMYD3 Biochemical Assay: The assays were all performed in a buffer consisting of 25 mM Tris-Cl pH 8.0
CHEMBL6005800		None	450.58	0	3.27	BDBM432648	O=C(N[C@H]1CCN(C(=O)CC2CCNCC2)[C@@H](Cc2ccccc2)C1)c1cc(C2CC2)on1	IC50	'='	22.5	nM	7.65		877531	UO_0000065	16.97	0.32	4.38	8.74	0	CHEMBL5734901	SMYD3 Biochemical Assay: The assays were all performed in a buffer consisting of 25 mM Tris-Cl pH 8.0
CHEMBL5962446		None	389.48	0	2.52	BDBM432652	C[C@H]1C[C@@H](NC(=O)c2cc(C3CC3)on2)CCN1S(=O)(=O)c1ccccc1	IC50	'='	152	nM	6.82		877535	UO_0000065	17.51	0.34	4.3	7.37	0	CHEMBL5734901	SMYD3 Biochemical Assay: The assays were all performed in a buffer consisting of 25 mM Tris-Cl pH 8.0
CHEMBL5808376		None	426.52	0	2.18	BDBM432657	C[C@@H]1CC(NC(=O)c2cc(C3CC3)on2)CCN1C(=O)[C@@H](CN)Cc1ccc(O)cc1	IC50	'='	1165	nM	5.93		877540	UO_0000065	13.91	0.26	3.75	4.88	0	CHEMBL5734901	SMYD3 Biochemical Assay: The assays were all performed in a buffer consisting of 25 mM Tris-Cl pH 8.0
CHEMBL6038667		None	410.52	0	3.17	BDBM432666	C[C@H]1C[C@H](NC(=O)c2cc(C3CC3)on2)CCN1C(=O)c1cccc(C(C)(C)N)c1	IC50	'='	2753	nM	5.56		877549	UO_0000065	13.54	0.25	2.39	5.48	0	CHEMBL5734901	SMYD3 Biochemical Assay: The assays were all performed in a buffer consisting of 25 mM Tris-Cl pH 8.0
CHEMBL5796299		None	410.52	0	3.17	BDBM432670	C[C@H]1C[C@@H](NC(=O)c2cc(C3CC3)on2)CCN1C(=O)c1ccc(C(C)(C)N)cc1	IC50	'='	4394	nM	5.36		877553	UO_0000065	13.05	0.24	2.19	5.28	0	CHEMBL5734901	SMYD3 Biochemical Assay: The assays were all performed in a buffer consisting of 25 mM Tris-Cl pH 8.0
CHEMBL5847877		None	388.51	0	2.43	BDBM432672	C[C@H]1C[C@H](NC(=O)c2cc(C3CC3)on2)CCN1C(=O)C1CCCC(CN)C1	IC50	'='	5888	nM	5.23		877555	UO_0000065	13.46	0.26	2.8	5.15	0	CHEMBL5734901	SMYD3 Biochemical Assay: The assays were all performed in a buffer consisting of 25 mM Tris-Cl pH 8.0
CHEMBL6059686		None	389.48	0	2.52	BDBM432679	C[C@H]1C[C@H](NC(=O)c2cc(C3CC3)on2)CCN1S(=O)(=O)c1ccccc1	IC50	'='	3352	nM	5.47		877562	UO_0000065	14.06	0.28	2.95	5.92	0	CHEMBL5734901	SMYD3 Biochemical Assay: The assays were all performed in a buffer consisting of 25 mM Tris-Cl pH 8.0
CHEMBL5997923		None	413.5	0	2.46	BDBM432701	O=C(NC1CC2CC3(S(=O)(=O)c4ccccc4)CC(C1)N23)c1cc(C2CC2)on1	IC50	'='	793	nM	6.1		877584	UO_0000065	14.75	0.29	3.64	6.59	0	CHEMBL5734901	SMYD3 Biochemical Assay: The assays were all performed in a buffer consisting of 25 mM Tris-Cl pH 8.0
CHEMBL6020298		None	434.56	0	1.5	BDBM432742	O=C(NC1CC2CC3(S(=O)(=O)CCN4CCCC4)CC(C1)N23)c1cc(C2CC2)on1	IC50	'='	1112	nM	5.95		877625	UO_0000065	13.7	0.27	4.45	6.22	0	CHEMBL5734901	SMYD3 Biochemical Assay: The assays were all performed in a buffer consisting of 25 mM Tris-Cl pH 8.0
CHEMBL5799968		None	396.51	0	1.35	BDBM432745	NCCCS(=O)(=O)N1CCC(NC(=O)c2cc(C3CC3)on2)CC12CCC2	IC50	'='	130	nM	6.89		877628	UO_0000065	17.37	0.35	5.54	5.81	0	CHEMBL5734901	SMYD3 Biochemical Assay: The assays were all performed in a buffer consisting of 25 mM Tris-Cl pH 8.0
CHEMBL5824911		None	411.53	0	0.67	BDBM432963	C[C@@H]1CNCCN1S(=O)(=O)N1CC[C@H](NC(=O)c2cc(C3CC3)on2)C[C@@H]1C	IC50	'='	90.6	nM	7.04		877846	UO_0000065	17.11	0.34	6.37	6.53	0	CHEMBL5734901	SMYD3 Biochemical Assay: The assays were all performed in a buffer consisting of 25 mM Tris-Cl pH 8.0
CHEMBL5757378		None	495.65	0	0.92	BDBM432967	O=C(N[C@H]1C[C@H]2CC[C@@H](C1)N2S(=O)(=O)CCCNCCN1CCOCC1)c1cc(C2CC2)on1	IC50	'='	103	nM	6.99		877850	UO_0000065	14.1	0.28	6.07	5.97	0	CHEMBL5734901	SMYD3 Biochemical Assay: The assays were all performed in a buffer consisting of 25 mM Tris-Cl pH 8.0
CHEMBL5880593		None	449.58	0	1.3	BDBM433272	CN1CC2CCC(C1)N2S(=O)(=O)N1[C@@H]2CC[C@H]1C[C@@H](NC(=O)c1cc(C3CC3)on1)C2	IC50	'='	107	nM	6.97		878155	UO_0000065	15.5	0.31	5.67	7.04	0	CHEMBL5734901	SMYD3 Biochemical Assay: The assays were all performed in a buffer consisting of 25 mM Tris-Cl pH 8.0
CHEMBL5963803		None	422.55	0	1.7	BDBM433277	CN1CCCC1CS(=O)(=O)N1[C@@H]2CC[C@H]1C[C@@H](NC(=O)c1cc(C3CC3)on1)C2	IC50	'='	134	nM	6.87		878160	UO_0000065	16.27	0.32	5.17	7.18	0	CHEMBL5734901	SMYD3 Biochemical Assay: The assays were all performed in a buffer consisting of 25 mM Tris-Cl pH 8.0
CHEMBL5807347		None	458.58	0	2.05	BDBM433049	O=C(N[C@@H]1CCN(S(=O)(=O)C2CCNC2)[C@H](Cc2ccccc2)C1)c1cc(C2CC2)on1	IC50	'='	667	nM	6.18		877932	UO_0000065	13.47	0.26	4.13	5.91	0	CHEMBL5734901	SMYD3 Biochemical Assay: The assays were all performed in a buffer consisting of 25 mM Tris-Cl pH 8.0
CHEMBL6062421		None	425.56	0	1.06	BDBM432998	CC1CN(S(=O)(=O)N2CC[C@H](NC(=O)c3cc(C4CC4)on3)C[C@@H]2C)CC(C)N1	IC50	'='	210	nM	6.68		877881	UO_0000065	15.69	0.31	5.62	6.2	0	CHEMBL5734901	SMYD3 Biochemical Assay: The assays were all performed in a buffer consisting of 25 mM Tris-Cl pH 8.0
CHEMBL6027520		None	451.59	0	1.55	BDBM432999	CC1CN(S(=O)(=O)N2[C@@H]3CC[C@H]2C[C@@H](NC(=O)c2cc(C4CC4)on2)C3)CC(C)N1C	IC50	'='	215	nM	6.67		877882	UO_0000065	14.76	0.29	5.12	6.74	0	CHEMBL5734901	SMYD3 Biochemical Assay: The assays were all performed in a buffer consisting of 25 mM Tris-Cl pH 8.0
CHEMBL5757541		None	501.65	1	2.29	BDBM433011	CN(C1CCNCC1)S(=O)(=O)N1CC[C@@H](NC(=O)c2cc(C3CC3)on2)C[C@@H]1Cc1ccccc1	IC50	'='	295	nM	6.53		877894	UO_0000065	13.02	0.25	4.24	6.06	0	CHEMBL5734901	SMYD3 Biochemical Assay: The assays were all performed in a buffer consisting of 25 mM Tris-Cl pH 8.0
CHEMBL5762386		None	437.57	0	1.21	BDBM433109	C[C@H]1C[C@@H](NC(=O)c2cc(C3CC3)on2)CCN1S(=O)(=O)N1CCC2(CCN2)CC1	IC50	'='	2.73	nM	8.56		877992	UO_0000065	19.57	0.39	7.35	7.95	0	CHEMBL5734901	SMYD3 Biochemical Assay: The assays were all performed in a buffer consisting of 25 mM Tris-Cl pH 8.0
CHEMBL5741612		None	410.54	0	1.56	BDBM433111	CCc1cc(C(=O)N[C@H]2C[C@H]3CC[C@@H](C2)N3S(=O)(=O)[C@H]2CC[C@@H](N)CC2)no1	IC50	'='	2.78	nM	8.56		877994	UO_0000065	20.84	0.42	7	7.22	0	CHEMBL5734901	SMYD3 Biochemical Assay: The assays were all performed in a buffer consisting of 25 mM Tris-Cl pH 8.0
CHEMBL5849724		None	233.31	0	1.01	BDBM377999	N[C@H]1CC[C@H](NC(=O)Cc2cccnc2)CC1	IC50	'>'	100000	nM			756007	UO_0000065					0	CHEMBL5733491	SMYD3 Biochemical Assay: The assays were all performed in a buffer consisting of 25 mM Tris-Cl pH 8.0
CHEMBL5904514		None	287.36	0	1.3	BDBM377993	CC1(CNC(=O)c2ccc3c(c2)CC(=O)N3)CCNCC1	IC50	'='	65690	nM	4.18		756001	UO_0000065	14.55	0.27	2.88	5.96	0	CHEMBL5733491	SMYD3 Biochemical Assay: The assays were all performed in a buffer consisting of 25 mM Tris-Cl pH 8.0
CHEMBL5964380		None	405.48	0	1.5	BDBM433053	C[C@H]1C[C@@H](NC(=O)c2cc(C3CC3)on2)CCN1S(=O)(=O)c1ccnc(N)c1	IC50	'='	684	nM	6.17		877936	UO_0000065	15.2	0.3	4.66	4.69	0	CHEMBL5734901	SMYD3 Biochemical Assay: The assays were all performed in a buffer consisting of 25 mM Tris-Cl pH 8.0
CHEMBL6064850		None	451.55	0	0.19	BDBM433055	O=C(N[C@H]1C[C@H]2CC[C@@H](C1)N2S(=O)(=O)N1CC2COCC(C1)N2)c1cc(C2CC2)on1	IC50	'='	731	nM	6.14		877938	UO_0000065	13.59	0.27	5.95	5.24	0	CHEMBL5734901	SMYD3 Biochemical Assay: The assays were all performed in a buffer consisting of 25 mM Tris-Cl pH 8.0
CHEMBL5843540		None	469.61	0	0.77	BDBM433076	C[C@H]1C[C@@H](NC(=O)c2cc(C3CC3)on2)CCN1S(=O)(=O)N1CCC(N(C)CCO)CC1	IC50	'='	1.21	nM	8.92		877959	UO_0000065	18.99	0.38	8.15	7.48	0	CHEMBL5734901	SMYD3 Biochemical Assay: The assays were all performed in a buffer consisting of 25 mM Tris-Cl pH 8.0
CHEMBL5792955		None	454.59	0	1.19	BDBM433084	CCc1cc(C(=O)N[C@H]2C[C@H]3CC[C@@H](C2)N3S(=O)(=O)[C@H]2CC[C@H](NCCO)CC2)no1	IC50	'='	1.42	nM	8.85		877967	UO_0000065	19.46	0.39	7.66	7.09	0	CHEMBL5734901	SMYD3 Biochemical Assay: The assays were all performed in a buffer consisting of 25 mM Tris-Cl pH 8.0
CHEMBL5951905		None	527.69	1	2.82	BDBM433087	O=C(N[C@H]1C[C@H]2CC[C@@H](C1)N2S(=O)(=O)N1CCC(NCCc2ccccc2)CC1)c1cc(C2CC2)on1	IC50	'='	1.82	nM	8.74		877970	UO_0000065	16.56	0.32	5.92	8.11	0	CHEMBL5734901	SMYD3 Biochemical Assay: The assays were all performed in a buffer consisting of 25 mM Tris-Cl pH 8.0
CHEMBL5822720		None	425.56	0	1.05	BDBM433096	CC1CN(S(=O)(=O)N2CC[C@H](NC(=O)c3cc(C4CC4)on3)C[C@@H]2C)CCC1N	IC50	'='	2.18	nM	8.66		877979	UO_0000065	20.35	0.41	7.61	7.11	0	CHEMBL5734901	SMYD3 Biochemical Assay: The assays were all performed in a buffer consisting of 25 mM Tris-Cl pH 8.0
CHEMBL5941105		None	398.53	0	1.59	BDBM433102	CCC[C@H]1C[C@@H](NC(=O)c2cc(C3CC3)on2)CCN1S(=O)(=O)CCCN	IC50	'='	2.4	nM	8.62		877985	UO_0000065	21.63	0.44	7.03	7.27	0	CHEMBL5734901	SMYD3 Biochemical Assay: The assays were all performed in a buffer consisting of 25 mM Tris-Cl pH 8.0
CHEMBL6039340		None	450.61	0	2.48	BDBM433103	CN(C)[C@H]1CC[C@H](S(=O)(=O)N2[C@@H]3CC[C@H]2C[C@@H](NC(=O)c2cc(C4CC4)on2)C3)CC1	IC50	'='	2.44	nM	8.61		877986	UO_0000065	19.11	0.38	6.13	8.99	0	CHEMBL5734901	SMYD3 Biochemical Assay: The assays were all performed in a buffer consisting of 25 mM Tris-Cl pH 8.0
CHEMBL5743419		None	478.66	0	2.98	BDBM433105	CC(C)CN1CCC(CS(=O)(=O)N2[C@@H]3CC[C@H]2C[C@@H](NC(=O)c2cc(C4CC4)on2)C3)CC1	IC50	'='	2.49	nM	8.6		877988	UO_0000065	17.97	0.36	5.62	8.99	0	CHEMBL5734901	SMYD3 Biochemical Assay: The assays were all performed in a buffer consisting of 25 mM Tris-Cl pH 8.0
CHEMBL5932627		None	505.69	1	2.58	BDBM433114	CC(C)CN1CCC2(CC1)CN(S(=O)(=O)N1[C@@H]3CC[C@H]1C[C@@H](NC(=O)c1cc(C4CC4)on1)C3)C2	IC50	'='	3.13	nM	8.5		877997	UO_0000065	16.82	0.33	5.92	8.59	0	CHEMBL5734901	SMYD3 Biochemical Assay: The assays were all performed in a buffer consisting of 25 mM Tris-Cl pH 8.0
CHEMBL5816836		None	422.6	0	2.28	BDBM433132	C=S(=O)(C[C@H]1CCC[C@H](N)C1)N1CC[C@H](NC(=O)c2cc(C3CC3)on2)C[C@@H]1C	IC50	'='	4.64	nM	8.33		878015	UO_0000065	19.72	0.39	6.05	8.21	0	CHEMBL5734901	SMYD3 Biochemical Assay: The assays were all performed in a buffer consisting of 25 mM Tris-Cl pH 8.0
CHEMBL5976561		None	515.68	1	2.98	BDBM433135	C[C@H]1C[C@@H](NC(=O)c2cc(C3CC3)on2)CCN1S(=O)(=O)N1CCC(N(C)Cc2ccccc2)CC1	IC50	'='	4.97	nM	8.3		878018	UO_0000065	16.1	0.32	5.32	8.39	0	CHEMBL5734901	SMYD3 Biochemical Assay: The assays were all performed in a buffer consisting of 25 mM Tris-Cl pH 8.0
CHEMBL5749952		None	467.64	0	2.09	BDBM433139	CC(C)CNC1CCN(S(=O)(=O)N2CC[C@H](NC(=O)c3cc(C4CC4)on3)C[C@@H]2C)CC1	IC50	'='	5.11	nM	8.29		878022	UO_0000065	17.73	0.35	6.2	7.69	0	CHEMBL5734901	SMYD3 Biochemical Assay: The assays were all performed in a buffer consisting of 25 mM Tris-Cl pH 8.0
CHEMBL5790933		None	541.72	1	3.16	BDBM433140	CN(CCc1ccccc1)C1CCN(S(=O)(=O)N2[C@@H]3CC[C@H]2C[C@@H](NC(=O)c2cc(C4CC4)on2)C3)CC1	IC50	'='	5.28	nM	8.28		878023	UO_0000065	15.28	0.3	5.12	8.36	0	CHEMBL5734901	SMYD3 Biochemical Assay: The assays were all performed in a buffer consisting of 25 mM Tris-Cl pH 8.0
CHEMBL5890141		None	425.56	0	0.87	BDBM432982	C[C@@H]1CN(S(=O)(=O)N2CCN(C)CC2)[C@H](C)C[C@@H]1NC(=O)c1cc(C2CC2)on1	IC50	'='	124	nM	6.91		877865	UO_0000065	16.23	0.33	6.04	6.98	0	CHEMBL5734901	SMYD3 Biochemical Assay: The assays were all performed in a buffer consisting of 25 mM Tris-Cl pH 8.0
CHEMBL5885792		None	544.72	1	3.05	BDBM433017	COCCN1CCC(CS(=O)(=O)N2CC[C@H](NC(=O)c3cc(C4CC4)on3)C[C@@H]2Cc2ccccc2)CC1	IC50	'='	322	nM	6.49		877900	UO_0000065	11.92	0.23	3.44	6.18	0	CHEMBL5734901	SMYD3 Biochemical Assay: The assays were all performed in a buffer consisting of 25 mM Tris-Cl pH 8.0
CHEMBL6008824		None	431.52	0	2.03	BDBM433027	Nc1cc(S(=O)(=O)N2C3CCC[C@@H]2C[C@H](NC(=O)c2cc(C4CC4)on2)C3)ccn1	IC50	'='	413	nM	6.38		877910	UO_0000065	14.79	0.29	4.35	4.86	0	CHEMBL5734901	SMYD3 Biochemical Assay: The assays were all performed in a buffer consisting of 25 mM Tris-Cl pH 8.0
CHEMBL5757693		None	523.7	1	1.37	BDBM433035	C[C@H]1CN(S(=O)(=O)CC2CCN(CCN3CCOCC3)CC2)CC[C@H]1NC(=O)c1cc(C2CC2)on1	IC50	'='	476	nM	6.32		877918	UO_0000065	12.07	0.24	4.95	5.84	0	CHEMBL5734901	SMYD3 Biochemical Assay: The assays were all performed in a buffer consisting of 25 mM Tris-Cl pH 8.0
CHEMBL5911449		None	404.49	0	2.23	BDBM433038	Cc1ccnc(S(=O)(=O)N2CC[C@H](NC(=O)c3cc(C4CC4)on3)C[C@@H]2C)c1	IC50	'='	512	nM	6.29		877921	UO_0000065	15.55	0.31	4.06	5.97	0	CHEMBL5734901	SMYD3 Biochemical Assay: The assays were all performed in a buffer consisting of 25 mM Tris-Cl pH 8.0
CHEMBL5880261		None	486.64	0	2.69	BDBM433041	O=C(N[C@@H]1CCN(S(=O)(=O)CC2CCNCC2)[C@H](Cc2ccccc2)C1)c1cc(C2CC2)on1	IC50	'='	518	nM	6.29		877924	UO_0000065	12.92	0.25	3.6	6.01	0	CHEMBL5734901	SMYD3 Biochemical Assay: The assays were all performed in a buffer consisting of 25 mM Tris-Cl pH 8.0
CHEMBL5888222		None	481.62	0	0.96	BDBM433141	O=C(N[C@H]1C[C@H]2CC[C@@H](C1)N2S(=O)(=O)N1CCC(NCCCO)CC1)c1cc(C2CC2)on1	IC50	'='	5.3	nM	8.28		878024	UO_0000065	17.18	0.34	7.32	6.46	0	CHEMBL5734901	SMYD3 Biochemical Assay: The assays were all performed in a buffer consisting of 25 mM Tris-Cl pH 8.0
CHEMBL6016304		None	493.63	0	1.05	BDBM433146	O=C(N[C@H]1C[C@H]2CC[C@@H](C1)N2S(=O)(=O)N1CC2CCC(C1)N2CCCO)c1cc(C2CC2)on1	IC50	'='	6.21	nM	8.21		878029	UO_0000065	16.63	0.33	7.16	6.88	0	CHEMBL5734901	SMYD3 Biochemical Assay: The assays were all performed in a buffer consisting of 25 mM Tris-Cl pH 8.0
CHEMBL5973038		None	483.64	0	1.42	BDBM433147	COCCN(C)C1CCN(S(=O)(=O)N2CC[C@H](NC(=O)c3cc(C4CC4)on3)C[C@@H]2C)CC1	IC50	'='	6.44	nM	8.19		878030	UO_0000065	16.94	0.34	6.77	7.57	0	CHEMBL5734901	SMYD3 Biochemical Assay: The assays were all performed in a buffer consisting of 25 mM Tris-Cl pH 8.0
CHEMBL5771961		None	495.65	0	1.61	BDBM433165	COCCCNC1CCN(S(=O)(=O)N2[C@@H]3CC[C@H]2C[C@@H](NC(=O)c2cc(C4CC4)on2)C3)CC1	IC50	'='	9.05	nM	8.04		878048	UO_0000065	16.23	0.32	6.43	6.87	0	CHEMBL5734901	SMYD3 Biochemical Assay: The assays were all performed in a buffer consisting of 25 mM Tris-Cl pH 8.0
CHEMBL5887477		None	467.64	0	2.19	BDBM433168	CCN(CC)C1CCN(S(=O)(=O)N2CC[C@H](NC(=O)c3cc(C4CC4)on3)C[C@@H]2C)CC1	IC50	'='	9.46	nM	8.02		878051	UO_0000065	17.16	0.34	5.83	8.11	0	CHEMBL5734901	SMYD3 Biochemical Assay: The assays were all performed in a buffer consisting of 25 mM Tris-Cl pH 8.0
CHEMBL5835908		None	410.54	0	1.59	BDBM433169	C[C@H]1CN(S(=O)(=O)[C@H]2CC[C@@H](N)CC2)CC[C@H]1NC(=O)c1cc(C2CC2)on1	IC50	'='	9.62	nM	8.02		878052	UO_0000065	19.53	0.39	6.43	6.76	0	CHEMBL5734901	SMYD3 Biochemical Assay: The assays were all performed in a buffer consisting of 25 mM Tris-Cl pH 8.0
CHEMBL5829496		None	438.59	0	2.19	BDBM433175	CC(C)c1cc(C(=O)N[C@H]2C[C@H]3CC[C@@H](C2)N3S(=O)(=O)CC2CCN(C)CC2)no1	IC50	'='	10.7	nM	7.97		878058	UO_0000065	18.17	0.36	5.78	8.32	0	CHEMBL5734901	SMYD3 Biochemical Assay: The assays were all performed in a buffer consisting of 25 mM Tris-Cl pH 8.0
CHEMBL5909830		None	477.63	0	2.08	BDBM433202	O=C(N[C@H]1C[C@H]2CC[C@@H](C1)N2S(=O)(=O)N1CCC(N2CCCC2)CC1)c1cc(C2CC2)on1	IC50	'='	17.1	nM	7.77		878085	UO_0000065	16.26	0.32	5.69	7.85	0	CHEMBL5734901	SMYD3 Biochemical Assay: The assays were all performed in a buffer consisting of 25 mM Tris-Cl pH 8.0
CHEMBL5868854		None	348.45	0	1.79	BDBM432528	C[C@H]1C[C@@H](NC(=O)c2cc(C3CC3)on2)CCN1C(=O)CCCCN	IC50	'='	1283	nM	5.89		877411	UO_0000065	16.91	0.32	4.1	5.81	0	CHEMBL5734901	SMYD3 Biochemical Assay: The assays were all performed in a buffer consisting of 25 mM Tris-Cl pH 8.0
CHEMBL5957860		None	395.4	0	2.03	BDBM432532	C[C@H]1C[C@@H](NC(=O)c2cc(C3CC3)on2)CCN1S(=O)(=O)CC(F)(F)F	IC50	'='	3262	nM	5.49		877415	UO_0000065	13.88	0.29	3.46	5.93	0	CHEMBL5734901	SMYD3 Biochemical Assay: The assays were all performed in a buffer consisting of 25 mM Tris-Cl pH 8.0
CHEMBL5805693		None	411.53	0	0.63	BDBM432555	C[C@@H]1C[C@H](NC(=O)c2cc(C3CC3)on2)CCN1S(=O)(=O)N1CCN(C)CC1	IC50	'='	1195	nM	5.92		877438	UO_0000065	14.39	0.29	5.29	5.98	0	CHEMBL5734901	SMYD3 Biochemical Assay: The assays were all performed in a buffer consisting of 25 mM Tris-Cl pH 8.0
CHEMBL5773942		None	341.43	0	1.48	BDBM432560	CCS(=O)(=O)N1CC[C@H](NC(=O)c2cc(C3CC3)on2)C[C@@H]1C	IC50	'='	2447	nM	5.61		877443	UO_0000065	16.43	0.33	4.13	6.07	0	CHEMBL5734901	SMYD3 Biochemical Assay: The assays were all performed in a buffer consisting of 25 mM Tris-Cl pH 8.0
CHEMBL5899946		None	341.43	0	1.48	BDBM432561	CCS(=O)(=O)N1CC[C@@H](NC(=O)c2cc(C3CC3)on2)C[C@H]1C	IC50	'>'	10000	nM			877444	UO_0000065					0	CHEMBL5734901	SMYD3 Biochemical Assay: The assays were all performed in a buffer consisting of 25 mM Tris-Cl pH 8.0
CHEMBL6065183		None	341.43	0	1.48	BDBM432562	CCS(=O)(=O)N1CC[C@@H](NC(=O)c2cc(C3CC3)on2)C[C@@H]1C	IC50	'>'	10000	nM			877445	UO_0000065					0	CHEMBL5734901	SMYD3 Biochemical Assay: The assays were all performed in a buffer consisting of 25 mM Tris-Cl pH 8.0
CHEMBL5754410		None	388.51	0	2.42	BDBM432563	CC1CN(C(=O)[C@H]2CC[C@H](N)CC2)C(C)CC1NC(=O)c1cc(C2CC2)on1	IC50	'='	32.2	nM	7.49		877446	UO_0000065	19.28	0.37	5.07	7.38	0	CHEMBL5734901	SMYD3 Biochemical Assay: The assays were all performed in a buffer consisting of 25 mM Tris-Cl pH 8.0
CHEMBL5789725		None	388.51	0	2.57	BDBM432564	C[C@@H]1CC(NC(=O)c2cc(C3CC3)on2)CCN1C(=O)CC1CCCC(N)C1	IC50	'='	410	nM	6.39		877447	UO_0000065	16.44	0.31	3.82	6.3	0	CHEMBL5734901	SMYD3 Biochemical Assay: The assays were all performed in a buffer consisting of 25 mM Tris-Cl pH 8.0
CHEMBL5744263		None	424.55	0	2.87	BDBM432571	C[C@H]1C[C@H](NC(=O)c2cc(C3CC3)on2)CCN1C(=O)CC(CN)Cc1ccccc1	IC50	'>'	10000	nM			877454	UO_0000065					0	CHEMBL5734901	SMYD3 Biochemical Assay: The assays were all performed in a buffer consisting of 25 mM Tris-Cl pH 8.0
CHEMBL5761094		None	399.47	0	1.03	BDBM432580	COC(=O)CCS(=O)(=O)N1CC[C@H](NC(=O)c2cc(C3CC3)on2)C[C@@H]1C	IC50	'='	4853	nM	5.31		877463	UO_0000065	13.3	0.27	4.28	4.47	0	CHEMBL5734901	SMYD3 Biochemical Assay: The assays were all performed in a buffer consisting of 25 mM Tris-Cl pH 8.0
CHEMBL5750043		None	390.47	0	1.92	BDBM432593	C[C@@H]1C[C@H](NC(=O)c2cc(C3CC3)on2)CCN1S(=O)(=O)c1ccccn1	IC50	'='	4842	nM	5.32		877476	UO_0000065	13.61	0.27	3.39	5.04	0	CHEMBL5734901	SMYD3 Biochemical Assay: The assays were all performed in a buffer consisting of 25 mM Tris-Cl pH 8.0
CHEMBL5932579		None	348.45	0	1.65	BDBM432598	CC[C@@H]1CN(C(=O)CCCN)CC[C@H]1NC(=O)c1cc(C2CC2)on1	IC50	'='	6097	nM	5.21		877481	UO_0000065	14.97	0.28	3.56	5.14	0	CHEMBL5734901	SMYD3 Biochemical Assay: The assays were all performed in a buffer consisting of 25 mM Tris-Cl pH 8.0
CHEMBL5752159		None	348.45	0	1.65	BDBM432600	CC[C@H]1CN(C(=O)CCCN)CC[C@@H]1NC(=O)c1cc(C2CC2)on1	IC50	'='	3600	nM	5.44		877483	UO_0000065	15.62	0.3	3.79	5.37	0	CHEMBL5734901	SMYD3 Biochemical Assay: The assays were all performed in a buffer consisting of 25 mM Tris-Cl pH 8.0
CHEMBL5777018		None	376.5	0	2.57	BDBM432602	CC[C@@H]1CC(NC(=O)c2cc(C3CC3)on2)C[C@H](CC)N1C(=O)CCCN	IC50	'='	6932	nM	5.16		877485	UO_0000065	13.7	0.26	2.59	5.08	0	CHEMBL5734901	SMYD3 Biochemical Assay: The assays were all performed in a buffer consisting of 25 mM Tris-Cl pH 8.0
CHEMBL6026092		None	595.44	1	1.52	BDBM432337	NCC(=O)NC[C@@H](Cc1ccc(O)c(I)c1)C(=O)N1CCC(NC(=O)c2cc(C3CC3)on2)CC1	IC50	'='	9413	nM	5.03		877220	UO_0000065	8.44	0.2	3.51	3.33	0	CHEMBL5734901	SMYD3 Biochemical Assay: The assays were all performed in a buffer consisting of 25 mM Tris-Cl pH 8.0
CHEMBL6015109		None	595.44	1	1.52	BDBM432338	NCC(=O)NC[C@H](Cc1ccc(O)c(I)c1)C(=O)N1CCC(NC(=O)c2cc(C3CC3)on2)CC1	IC50	'='	623	nM	6.21		877221	UO_0000065	10.42	0.24	4.69	4.12	0	CHEMBL5734901	SMYD3 Biochemical Assay: The assays were all performed in a buffer consisting of 25 mM Tris-Cl pH 8.0
CHEMBL6002213		None	374.49	0	2.05	BDBM432354	C[C@@H]1C[C@@H](NC(=O)c2cc(C3CC3)on2)CCN1C(=O)CC1CCNCC1	IC50	'='	862	nM	6.06		877237	UO_0000065	16.19	0.31	4.01	6.93	0	CHEMBL5734901	SMYD3 Biochemical Assay: The assays were all performed in a buffer consisting of 25 mM Tris-Cl pH 8.0
CHEMBL5765599		None	374.49	0	2.05	BDBM432357	C[C@H]1C[C@H](NC(=O)c2cc(C3CC3)on2)CCN1C(=O)CC1CCNCC1	IC50	'='	172	nM	6.76		877240	UO_0000065	18.06	0.34	4.71	7.73	0	CHEMBL5734901	SMYD3 Biochemical Assay: The assays were all performed in a buffer consisting of 25 mM Tris-Cl pH 8.0
CHEMBL5923241		None	356.45	0	0.28	BDBM432366	C[C@@H]1CN(S(=O)(=O)CCN)CCC1NC(=O)c1cc(C2CC2)on1	IC50	'='	205	nM	6.69		877249	UO_0000065	18.76	0.38	6.41	5.64	0	CHEMBL5734901	SMYD3 Biochemical Assay: The assays were all performed in a buffer consisting of 25 mM Tris-Cl pH 8.0
CHEMBL5748787		None	374.49	0	2.18	BDBM432407	C[C@H]1CC(NC(=O)c2cc(C3CC3)on2)CCN1C(=O)[C@H]1CCC[C@H](N)C1	IC50	'='	3521	nM	5.45		877290	UO_0000065	14.56	0.28	3.27	5.37	0	CHEMBL5734901	SMYD3 Biochemical Assay: The assays were all performed in a buffer consisting of 25 mM Tris-Cl pH 8.0
CHEMBL5983723		None	375.47	0	1.68	BDBM432423	C[C@@H]1CC(NC(=O)c2cc(C3CC3)on2)CCN1C(=O)N1CCC(N)CC1	IC50	'='	851	nM	6.07		877306	UO_0000065	16.17	0.31	4.39	5.8	0	CHEMBL5734901	SMYD3 Biochemical Assay: The assays were all performed in a buffer consisting of 25 mM Tris-Cl pH 8.0
CHEMBL5902357		None	388.51	0	2.44	BDBM432425	CN[C@H]1CC[C@H](C(=O)N2CCC(NC(=O)c3cc(C4CC4)on3)C[C@H]2C)CC1	IC50	'='	274	nM	6.56		877308	UO_0000065	16.89	0.32	4.12	7.5	0	CHEMBL5734901	SMYD3 Biochemical Assay: The assays were all performed in a buffer consisting of 25 mM Tris-Cl pH 8.0
CHEMBL5873473		None	396.44	0	1.91	BDBM432455	O=C(NC1CCN(C(=O)CC2CCNCC2)CC1(F)F)c1cc(C2CC2)on1	IC50	'='	1557	nM	5.81		877338	UO_0000065	14.65	0.28	3.9	6.64	0	CHEMBL5734901	SMYD3 Biochemical Assay: The assays were all performed in a buffer consisting of 25 mM Tris-Cl pH 8.0
CHEMBL6021733		None	388.51	0	2.3	BDBM432458	CC1(C)CN(C(=O)CC2CCNCC2)CCC1NC(=O)c1cc(C2CC2)on1	IC50	'='	521	nM	6.28		877341	UO_0000065	16.17	0.31	3.98	7.18	0	CHEMBL5734901	SMYD3 Biochemical Assay: The assays were all performed in a buffer consisting of 25 mM Tris-Cl pH 8.0
CHEMBL5809329		None	402.54	0	2.69	BDBM432466	C[C@H]1CC(NC(=O)c2cc(C3CC3)on2)CCN1C(=O)C(C)(C)C1CCNCC1	IC50	'='	4732	nM	5.33		877349	UO_0000065	13.23	0.25	2.63	6.09	0	CHEMBL5734901	SMYD3 Biochemical Assay: The assays were all performed in a buffer consisting of 25 mM Tris-Cl pH 8.0
CHEMBL5882273		None	378.45	0	1.75	BDBM432471	C[C@@H]1CC(NC(=O)c2cc(C3CC3)on2)CCN1C(=O)C1(F)CCNCC1	IC50	'='	677	nM	6.17		877354	UO_0000065	16.3	0.31	4.42	7.05	0	CHEMBL5734901	SMYD3 Biochemical Assay: The assays were all performed in a buffer consisting of 25 mM Tris-Cl pH 8.0
CHEMBL5801565		None	334.42	0	1.45	BDBM293332	CC(N)CC(=O)N[C@H]1CC[C@H](NC(=O)c2cc(C3CC3)on2)CC1	IC50	'='	466	nM	6.33		559154	UO_0000065	18.93	0.36	4.88	5.74	0	CHEMBL5731515	SMYD3 Biochemical Assay: S-adenosylmethionine (SAM)
CHEMBL5985484		None	320.39	0	1.06	BDBM293335	NCCC(=O)N[C@H]1CC[C@H](NC(=O)c2cc(C3CC3)on2)CC1	IC50	'='	475	nM	6.32		559157	UO_0000065	19.74	0.38	5.26	5.74	0	CHEMBL5731515	SMYD3 Biochemical Assay: S-adenosylmethionine (SAM)
CHEMBL5785497		None	350.46	0	1.77	BDBM293338	CCc1cc(C(=O)N[C@H]2CC[C@H](NC(=O)C[C@H](C)N)C[C@H]2CC)no1	IC50	'='	170	nM	6.77		559160	UO_0000065	19.32	0.37	5	6.14	0	CHEMBL5731515	SMYD3 Biochemical Assay: S-adenosylmethionine (SAM)
CHEMBL5791261		None	403.53	0	1.35	BDBM293341	CN1CCN(CCC(=O)N[C@H]2CC[C@H](NC(=O)c3cc(C4CC4)on3)CC2)CC1	IC50	'='	7716	nM	5.11		559163	UO_0000065	12.67	0.24	3.76	5.64	0	CHEMBL5731515	SMYD3 Biochemical Assay: S-adenosylmethionine (SAM)
CHEMBL5898160		None	292.38	0	1.14	BDBM293364	NCCN[C@H]1CC[C@H](NC(=O)c2cc(C3CC3)on2)CC1	IC50	'='	853	nM	6.07		559181	UO_0000065	20.76	0.39	4.93	6.51	0	CHEMBL5731515	SMYD3 Biochemical Assay: S-adenosylmethionine (SAM)
CHEMBL5980427		None	438.57	0	3.4	BDBM293377	C[C@@H](N)CC(=O)N[C@H]1CC[C@H](N(CCc2ccccc2)C(=O)c2cc(C3CC3)on2)CC1	IC50	'='	5710	nM	5.24		559194	UO_0000065	11.96	0.22	1.84	5.17	0	CHEMBL5731515	SMYD3 Biochemical Assay: S-adenosylmethionine (SAM)
CHEMBL3800480		None	481.02	0	1.89	6	O=C1Cc2cc(C(=O)N[C@H]3C[C@H]4CC[C@@H](C3)N4S(=O)(=O)CC3CCNCC3)c(Cl)cc2N1	IC50	'='	4	nM	8.4			UO_0000065	17.46	0.36	6.51	7.8	0	CHEMBL3803119	Inhibition of full length N-terminal His-tagged SMYD3 (1 to 428 residues) (unknown origin) expressed in Escherichia coli using N-terminal GST-tagged MEKK2 as substrate preincubated for 30 mins followed by substrate addition by scintillation proximity assay in presence of [3H]SAM	B	BAO_0000019	assay format	Homo sapiens	None	None	None	None				CHEMBL2321643	Histone-lysine N-methyltransferase SMYD3	Homo sapiens	SINGLE PROTEIN	CHEMBL3797202	1	Scientific Literature	ACS Med Chem Lett	2016	None				4
CHEMBL5904286		None	318.42	0	1.09	BDBM378261	Cc1cc(C(=O)NC(C)C2CCN(C(=O)[C@H](C)N)CC2)ccn1	IC50	'>'	100000	nM			756267	UO_0000065					0	CHEMBL5733491	SMYD3 Biochemical Assay: The assays were all performed in a buffer consisting of 25 mM Tris-Cl pH 8.0
CHEMBL4467704		None	415.92	0	4.07	15	CCOC(=O)N1CCN(C(=O)c2ccc3c(Cl)c4c(nc3c2)CCCCC4)CC1	IC50	'='	20400	nM	4.69			UO_0000065	11.28	0.22	0.62	7.48	0	CHEMBL4306860	Inhibition of SMYD3 (unknown origin) using MAP3K2 peptide as substrate pretreated for 30 mins followed by substrate addition and measured after 30 mins by MTase Glo reagent based luminescence assay	B	BAO_0000357	single protein format	Homo sapiens	None	None	None	None				CHEMBL2321643	Histone-lysine N-methyltransferase SMYD3	Homo sapiens	SINGLE PROTEIN	CHEMBL4304770	1	Scientific Literature	ACS Med Chem Lett	2019	None				20.4
CHEMBL5987270		None	306.37	0	0.29	BDBM378279	NCCC(=O)N[C@H]1CC[C@H](NC(=O)c2cccnc2O)CC1	IC50	'='	44480	nM	4.35		756285	UO_0000065	14.2	0.27	4.06	3.71	0	CHEMBL5733491	SMYD3 Biochemical Assay: The assays were all performed in a buffer consisting of 25 mM Tris-Cl pH 8.0
CHEMBL5823543		None	235.29	0	0.79	BDBM378280	N[C@H]1CC[C@H](NC(=O)c2cccnc2O)CC1	IC50	'>'	100000	nM			756286	UO_0000065					0	CHEMBL5733491	SMYD3 Biochemical Assay: The assays were all performed in a buffer consisting of 25 mM Tris-Cl pH 8.0
CHEMBL5776674		None	306.37	0	-0.44	BDBM378289	NCCC(=O)N[C@H]1CC[C@H](NC(=O)c2cncnc2N)CC1	IC50	'>'	100000	nM			756295	UO_0000065					0	CHEMBL5733491	SMYD3 Biochemical Assay: The assays were all performed in a buffer consisting of 25 mM Tris-Cl pH 8.0
CHEMBL5940689		None	310.42	0	0.85	BDBM378179	CC(NC(=O)c1cncs1)C1CCN(C(=O)[C@H](C)N)CC1	IC50	'>'	100000	nM			756185	UO_0000065					0	CHEMBL5733491	SMYD3 Biochemical Assay: The assays were all performed in a buffer consisting of 25 mM Tris-Cl pH 8.0
CHEMBL5832574		None	343.27	0	2.21	BDBM378323	Cc1nn(C(C)C(=O)N[C@H]2CC[C@H](N)CC2)c(C)c1Br	IC50	'>'	100000	nM			756329	UO_0000065					0	CHEMBL5733491	SMYD3 Biochemical Assay: The assays were all performed in a buffer consisting of 25 mM Tris-Cl pH 8.0
CHEMBL5838896		None	298.27	0	2.15	BDBM377903	Cn1nc(C(F)(F)F)cc1C(=O)Nc1ccc(CN)cc1	IC50	'='	153360	nM		Outside typical range	755915	UO_0000065					0	CHEMBL5733491	SMYD3 Biochemical Assay: The assays were all performed in a buffer consisting of 25 mM Tris-Cl pH 8.0
CHEMBL6026969		None	319.41	0	0.49	BDBM378057	Cc1cnc(C(=O)NC(C)C2CCN(C(=O)[C@H](C)N)CC2)cn1	IC50	'>'	100000	nM			756063	UO_0000065					0	CHEMBL5733491	SMYD3 Biochemical Assay: The assays were all performed in a buffer consisting of 25 mM Tris-Cl pH 8.0
CHEMBL5870583		None	320.4	0	-0.24	BDBM378060	CC(NC(=O)c1nccnc1N)C1CCN(C(=O)[C@H](C)N)CC1	IC50	'>'	100000	nM			756066	UO_0000065					0	CHEMBL5733491	SMYD3 Biochemical Assay: The assays were all performed in a buffer consisting of 25 mM Tris-Cl pH 8.0
CHEMBL6047187		None	319.41	0	0.37	BDBM378118	CC(NC(=O)c1cnccc1N)C1CCN(C(=O)[C@H](C)N)CC1	IC50	'>'	100000	nM			756124	UO_0000065					0	CHEMBL5733491	SMYD3 Biochemical Assay: The assays were all performed in a buffer consisting of 25 mM Tris-Cl pH 8.0
CHEMBL5812085		None	342.44	0	1.87	BDBM378119	CC(NC(=O)c1cccc2[nH]ccc12)C1CCN(C(=O)[C@H](C)N)CC1	IC50	'>'	100000	nM			756125	UO_0000065					0	CHEMBL5733491	SMYD3 Biochemical Assay: The assays were all performed in a buffer consisting of 25 mM Tris-Cl pH 8.0
CHEMBL5906304		None	318.42	0	1.09	BDBM378127	Cc1cncc(C(=O)NC(C)C2CCN(C(=O)[C@H](C)N)CC2)c1	IC50	'='	61590	nM	4.21		756133	UO_0000065	13.22	0.25	3.12	4.77	0	CHEMBL5733491	SMYD3 Biochemical Assay: The assays were all performed in a buffer consisting of 25 mM Tris-Cl pH 8.0
CHEMBL5938044		None	236.28	0	0.18	BDBM378142	N[C@H]1CC[C@H](NC(=O)c2ccc(O)nn2)CC1	IC50	'>'	100000	nM			756148	UO_0000065					0	CHEMBL5733491	SMYD3 Biochemical Assay: The assays were all performed in a buffer consisting of 25 mM Tris-Cl pH 8.0
CHEMBL5803653		None	272.35	0	1.57	BDBM378146	Cn1ncc2ccc(C(=O)N[C@H]3CC[C@H](N)CC3)cc21	IC50	'>'	100000	nM			756152	UO_0000065					0	CHEMBL5733491	SMYD3 Biochemical Assay: The assays were all performed in a buffer consisting of 25 mM Tris-Cl pH 8.0
CHEMBL5878461		None	235.29	0	0.79	BDBM378162	N[C@H]1CC[C@H](NC(=O)c2ccnc(O)c2)CC1	IC50	'>'	100000	nM			756168	UO_0000065					0	CHEMBL5733491	SMYD3 Biochemical Assay: The assays were all performed in a buffer consisting of 25 mM Tris-Cl pH 8.0
CHEMBL6047102		None	405.48	0	0.96	BDBM377876	CC(=O)Nc1ccc(S(=O)(=O)N2CCC(NC(=O)c3ccnn3C)CC2)cc1	IC50	'>'	100000	nM			755888	UO_0000065					0	CHEMBL5733491	SMYD3 Biochemical Assay: The assays were all performed in a buffer consisting of 25 mM Tris-Cl pH 8.0
CHEMBL4462956		None	444.96	0	3.26	17	CCCOC(=O)N1CCN(C(=O)c2ccc3c(Cl)c4c(nc3c2)CCC(CN)C4)CC1	IC50	'='	1200	nM	5.92			UO_0000065	13.31	0.26	2.66	6.67	0	CHEMBL4306860	Inhibition of SMYD3 (unknown origin) using MAP3K2 peptide as substrate pretreated for 30 mins followed by substrate addition and measured after 30 mins by MTase Glo reagent based luminescence assay	B	BAO_0000357	single protein format	Homo sapiens	None	None	None	None				CHEMBL2321643	Histone-lysine N-methyltransferase SMYD3	Homo sapiens	SINGLE PROTEIN	CHEMBL4304770	1	Scientific Literature	ACS Med Chem Lett	2019	None				1.2
CHEMBL4475972		None	429.95	0	4.46	(S)-13	CCCOC(=O)N1CCN(C(=O)c2ccc3c(Cl)c4c(nc3c2)CCCC4)[C@@H](C)C1	IC50	'='	140	nM	6.85			UO_0000065	15.94	0.31	2.39	10.92	0	CHEMBL4306860	Inhibition of SMYD3 (unknown origin) using MAP3K2 peptide as substrate pretreated for 30 mins followed by substrate addition and measured after 30 mins by MTase Glo reagent based luminescence assay	B	BAO_0000357	single protein format	Homo sapiens	None	None	None	None				CHEMBL2321643	Histone-lysine N-methyltransferase SMYD3	Homo sapiens	SINGLE PROTEIN	CHEMBL4304770	1	Scientific Literature	ACS Med Chem Lett	2019	None				0.14
CHEMBL4460269		None	387.87	0	3.29	5	COC(=O)N1CCN(C(=O)c2ccc3c(Cl)c4c(nc3c2)CCCC4)CC1	IC50	'='	123000	nM		Outside typical range		UO_0000065					0	CHEMBL4306860	Inhibition of SMYD3 (unknown origin) using MAP3K2 peptide as substrate pretreated for 30 mins followed by substrate addition and measured after 30 mins by MTase Glo reagent based luminescence assay	B	BAO_0000357	single protein format	Homo sapiens	None	None	None	None				CHEMBL2321643	Histone-lysine N-methyltransferase SMYD3	Homo sapiens	SINGLE PROTEIN	CHEMBL4304770	1	Scientific Literature	ACS Med Chem Lett	2019	None				123
CHEMBL5871621		None	404.47	0	0.73	BDBM377969	COc1cc(C(=O)NC(C)C2CCN(C(=O)[C@H](C)N)CC2)cc2c1OCC(=O)N2	IC50	'='	150970	nM		Outside typical range	755978	UO_0000065					0	CHEMBL5733491	SMYD3 Biochemical Assay: The assays were all performed in a buffer consisting of 25 mM Tris-Cl pH 8.0
CHEMBL5994535		None	261.35	0	2.42	BDBM377931	CCc1ncc(C(=O)Nc2ccc(CN)cc2)s1	IC50	'='	113720	nM		Outside typical range	755941	UO_0000065					0	CHEMBL5733491	SMYD3 Biochemical Assay: The assays were all performed in a buffer consisting of 25 mM Tris-Cl pH 8.0
CHEMBL5910530		None	249.31	0	1.22	BDBM377934	CC(=O)c1c[nH]c(C(=O)N[C@H]2CC[C@H](N)CC2)c1	IC50	'='	134140	nM		Outside typical range	755944	UO_0000065					0	CHEMBL5733491	SMYD3 Biochemical Assay: The assays were all performed in a buffer consisting of 25 mM Tris-Cl pH 8.0
CHEMBL5891790		None	411.53	0	0.16	BDBM432893	NCCNCCS(=O)(=O)N1[C@@H]2CC[C@H]1C[C@@H](NC(=O)c1cc(C3CC3)on1)C2	IC50	'='	12.8	nM	7.89		877776	UO_0000065	19.18	0.38	7.73	6.05	0	CHEMBL5734901	SMYD3 Biochemical Assay: The assays were all performed in a buffer consisting of 25 mM Tris-Cl pH 8.0
CHEMBL6046443		None	423.54	0	0.82	BDBM432912	C[C@H]1C[C@@H](NC(=O)c2cc(C3CC3)on2)CCN1S(=O)(=O)N1C2CCC1CNC2	IC50	'='	21.7	nM	7.66		877795	UO_0000065	18.09	0.36	6.84	7.11	0	CHEMBL5734901	SMYD3 Biochemical Assay: The assays were all performed in a buffer consisting of 25 mM Tris-Cl pH 8.0
CHEMBL5785631		None	425.56	0	1.02	BDBM432914	CCN1CCN(S(=O)(=O)N2CC[C@H](NC(=O)c3cc(C4CC4)on3)C[C@@H]2C)CC1	IC50	'='	22.8	nM	7.64		877797	UO_0000065	17.96	0.36	6.62	7.72	0	CHEMBL5734901	SMYD3 Biochemical Assay: The assays were all performed in a buffer consisting of 25 mM Tris-Cl pH 8.0
CHEMBL5826169		None	446.57	0	2.57	BDBM432924	C[C@H]1CN(S(=O)(=O)c2ccc(C(C)(C)N)cc2)CC[C@H]1NC(=O)c1cc(C2CC2)on1	IC50	'='	26.5	nM	7.58		877807	UO_0000065	16.97	0.33	5.01	6.39	0	CHEMBL5734901	SMYD3 Biochemical Assay: The assays were all performed in a buffer consisting of 25 mM Tris-Cl pH 8.0
CHEMBL5973714		None	423.54	0	0.77	BDBM432938	CN1CCN(S(=O)(=O)N2[C@@H]3CC[C@H]2C[C@@H](NC(=O)c2cc(C4CC4)on2)C3)CC1	IC50	'='	36.3	nM	7.44		877821	UO_0000065	17.57	0.35	6.67	7.52	0	CHEMBL5734901	SMYD3 Biochemical Assay: The assays were all performed in a buffer consisting of 25 mM Tris-Cl pH 8.0
CHEMBL5843098		None	513.66	1	2.78	BDBM433240	O=C(N[C@H]1C[C@H]2CC[C@@H](C1)N2S(=O)(=O)N(Cc1ccccc1)C1CCNCC1)c1cc(C2CC2)on1	IC50	'='	50.6	nM	7.3		878123	UO_0000065	14.2	0.28	4.52	6.77	0	CHEMBL5734901	SMYD3 Biochemical Assay: The assays were all performed in a buffer consisting of 25 mM Tris-Cl pH 8.0
CHEMBL5831672		None	437.57	0	1.21	BDBM433246	CN(C1CCCNC1)S(=O)(=O)N1[C@@H]2CC[C@H]1C[C@@H](NC(=O)c1cc(C3CC3)on1)C2	IC50	'='	54.1	nM	7.27		878129	UO_0000065	16.61	0.33	6.06	6.74	0	CHEMBL5734901	SMYD3 Biochemical Assay: The assays were all performed in a buffer consisting of 25 mM Tris-Cl pH 8.0
CHEMBL5964089		None	346.43	0	1.4	BDBM432372	C[C@H]1CC(NC(=O)c2cc(C3CC3)on2)CCN1C(=O)[C@H]1C[C@@H](N)C1	IC50	'='	2543	nM	5.59		877255	UO_0000065	16.15	0.31	4.19	5.51	0	CHEMBL5734901	SMYD3 Biochemical Assay: The assays were all performed in a buffer consisting of 25 mM Tris-Cl pH 8.0
CHEMBL6004056		None	450.58	0	3.27	BDBM432410	O=C(NC1CCN(C(=O)CC2CCNCC2)C(Cc2ccccc2)C1)c1cc(C2CC2)on1	IC50	'='	96.8	nM	7.01		877293	UO_0000065	15.57	0.29	3.74	8.02	0	CHEMBL5734901	SMYD3 Biochemical Assay: The assays were all performed in a buffer consisting of 25 mM Tris-Cl pH 8.0
CHEMBL5765939		None	334.42	0	1.4	BDBM432459	CC1(NC(=O)c2cc(C3CC3)on2)CCN(C(=O)CCCN)CC1	IC50	'='	7336	nM	5.13		877342	UO_0000065	15.35	0.29	3.73	5.06	0	CHEMBL5734901	SMYD3 Biochemical Assay: The assays were all performed in a buffer consisting of 25 mM Tris-Cl pH 8.0
CHEMBL5942349		None	392.46	0	0.8	BDBM432461	CCOC(=O)C1CN(C(=O)CCCN)CCC1NC(=O)c1cc(C2CC2)on1	IC50	'='	2233	nM	5.65		877344	UO_0000065	14.4	0.28	4.85	4.42	0	CHEMBL5734901	SMYD3 Biochemical Assay: The assays were all performed in a buffer consisting of 25 mM Tris-Cl pH 8.0
CHEMBL5763898		None	424.57	0	2.12	BDBM433167	CC(C)c1cc(C(=O)N[C@H]2C[C@H]3CC[C@@H](C2)N3S(=O)(=O)[C@H]2CC[C@H](N)CC2)no1	IC50	'='	9.38	nM	8.03		878050	UO_0000065	18.91	0.38	5.91	6.77	0	CHEMBL5734901	SMYD3 Biochemical Assay: The assays were all performed in a buffer consisting of 25 mM Tris-Cl pH 8.0
CHEMBL5945058		None	410.54	0	1.46	BDBM433171	C[C@H]1C[C@@H](NC(=O)c2cc(C3CC3)on2)CCN1S(=O)(=O)C[C@@H]1CCCNC1	IC50	'='	10	nM	8		878054	UO_0000065	19.49	0.39	6.54	7.65	0	CHEMBL5734901	SMYD3 Biochemical Assay: The assays were all performed in a buffer consisting of 25 mM Tris-Cl pH 8.0
CHEMBL6000788		None	437.57	0	1.21	BDBM433189	CN1CCC(NS(=O)(=O)N2[C@@H]3CC[C@H]2C[C@@H](NC(=O)c2cc(C4CC4)on2)C3)CC1	IC50	'='	13.7	nM	7.86		878072	UO_0000065	17.97	0.36	6.65	7.3	0	CHEMBL5734901	SMYD3 Biochemical Assay: The assays were all performed in a buffer consisting of 25 mM Tris-Cl pH 8.0
CHEMBL6047712		None	515.68	1	3.19	BDBM433194	C[C@@H](NC1CCN(S(=O)(=O)N2CC[C@H](NC(=O)c3cc(C4CC4)on3)C[C@@H]2C)CC1)c1ccccc1	IC50	'='	14.3	nM	7.84		878077	UO_0000065	15.21	0.3	4.65	7.28	0	CHEMBL5734901	SMYD3 Biochemical Assay: The assays were all performed in a buffer consisting of 25 mM Tris-Cl pH 8.0
CHEMBL5819559		None	388.51	0	2.71	BDBM432601	NCCCC(=O)N1CCC(NC(=O)c2cc(C3CC3)on2)CC12CCCCC2	IC50	'='	6465	nM	5.19		877484	UO_0000065	13.36	0.25	2.48	5.11	0	CHEMBL5734901	SMYD3 Biochemical Assay: The assays were all performed in a buffer consisting of 25 mM Tris-Cl pH 8.0
CHEMBL5915469		None	466.6	0	1.5	BDBM433064	O=C(N[C@H]1C[C@H]2CC[C@@H](C1)N2S(=O)(=O)[C@H]1CC[C@H](NCCO)CC1)c1cc(C2CC2)on1	IC50	'='	0.71	nM	9.15		877947	UO_0000065	19.61	0.39	7.65	7.33	0	CHEMBL5734901	SMYD3 Biochemical Assay: The assays were all performed in a buffer consisting of 25 mM Tris-Cl pH 8.0
CHEMBL5918891		None	425.56	0	1.19	BDBM433206	CC(C)c1cc(C(=O)N[C@H]2C[C@H]3CC[C@@H](C2)N3S(=O)(=O)N2CCC(N)CC2)no1	IC50	'='	20.5	nM	7.69		878089	UO_0000065	18.07	0.36	6.5	6.31	0	CHEMBL5734901	SMYD3 Biochemical Assay: The assays were all performed in a buffer consisting of 25 mM Tris-Cl pH 8.0
CHEMBL5781433		None	462.58	0	1.31	BDBM432763	C[C@@H]1C[C@H](NC(=O)c2cc(C3CC3)on2)CCN1S(=O)(=O)c1ccc(N(C)CCN)nc1	IC50	'='	163	nM	6.79		877646	UO_0000065	14.67	0.29	5.48	5.04	0	CHEMBL5734901	SMYD3 Biochemical Assay: The assays were all performed in a buffer consisting of 25 mM Tris-Cl pH 8.0
CHEMBL5957954		None	410.54	0	0.47	BDBM378506	C[C@H]1C[C@@H](NC(=O)c2cnn(C3CC3)c2)CCN1S(=O)(=O)N1CCC(N)CC1	IC50	'='	1001	nM	6		756512	UO_0000065	14.61	0.29	5.53	5.28	0	CHEMBL5733491	SMYD3 Biochemical Assay: The assays were all performed in a buffer consisting of 25 mM Tris-Cl pH 8.0
CHEMBL5829428		None	405.48	0	1.5	BDBM433005	C[C@H]1C[C@@H](NC(=O)c2cc(C3CC3)on2)CCN1S(=O)(=O)c1cccc(N)n1	IC50	'='	252	nM	6.6		877888	UO_0000065	16.27	0.32	5.1	5.02	0	CHEMBL5734901	SMYD3 Biochemical Assay: The assays were all performed in a buffer consisting of 25 mM Tris-Cl pH 8.0
CHEMBL5748590		None	460.6	0	2.42	BDBM433013	C[C@@H]1C[C@H](NC(=O)c2cc(C3CC3)on2)CCN1S(=O)(=O)CCC(N)Cc1ccccc1	IC50	'='	303	nM	6.52		877896	UO_0000065	14.15	0.28	4.1	5.5	0	CHEMBL5734901	SMYD3 Biochemical Assay: The assays were all performed in a buffer consisting of 25 mM Tris-Cl pH 8.0
CHEMBL5916668		None	356.45	0	0.42	BDBM432510	NCCCS(=O)(=O)N1CCC(NC(=O)c2cc(C3CC3)on2)CC1	IC50	'='	321	nM	6.49		877393	UO_0000065	18.22	0.37	6.07	5.48	0	CHEMBL5734901	SMYD3 Biochemical Assay: The assays were all performed in a buffer consisting of 25 mM Tris-Cl pH 8.0
CHEMBL5788408		None	342.42	0	0.6	BDBM432514	CNS(=O)(=O)N1CC[C@H](NC(=O)c2cc(C3CC3)on2)C[C@H]1C	IC50	'>'	10000	nM			877397	UO_0000065					0	CHEMBL5734901	SMYD3 Biochemical Assay: The assays were all performed in a buffer consisting of 25 mM Tris-Cl pH 8.0
CHEMBL5743150		None	353.44	0	1.63	BDBM432516	C[C@@H]1C[C@H](NC(=O)c2cc(C3CC3)on2)CCN1S(=O)(=O)C1CC1	IC50	'>'	10000	nM			877399	UO_0000065					0	CHEMBL5734901	SMYD3 Biochemical Assay: The assays were all performed in a buffer consisting of 25 mM Tris-Cl pH 8.0
CHEMBL5913587		None	371.46	0	1.11	BDBM432533	COCCS(=O)(=O)N1CC[C@H](NC(=O)c2cc(C3CC3)on2)C[C@@H]1C	IC50	'='	2362	nM	5.63		877416	UO_0000065	15.15	0.31	4.52	5.53	0	CHEMBL5734901	SMYD3 Biochemical Assay: The assays were all performed in a buffer consisting of 25 mM Tris-Cl pH 8.0
CHEMBL5781266		None	395.4	0	2.03	BDBM432546	C[C@H]1C[C@H](NC(=O)c2cc(C3CC3)on2)CCN1S(=O)(=O)CC(F)(F)F	IC50	'>'	10000	nM			877429	UO_0000065					0	CHEMBL5734901	SMYD3 Biochemical Assay: The assays were all performed in a buffer consisting of 25 mM Tris-Cl pH 8.0
CHEMBL6044084		None	386.5	0	2.32	BDBM432402	N[C@H]1CC[C@H](C(=O)N2[C@@H]3CC[C@H]2C[C@H](NC(=O)c2cc(C4CC4)on2)C3)CC1	IC50	'>'	10000	nM			877285	UO_0000065					0	CHEMBL5734901	SMYD3 Biochemical Assay: The assays were all performed in a buffer consisting of 25 mM Tris-Cl pH 8.0
CHEMBL6002408		None	362.47	0	2.04	BDBM432405	C[C@@H]1CC(NC(=O)c2cc(C3CC3)on2)CCN1C(=O)CC(C)(C)CN	IC50	'='	566	nM	6.25		877288	UO_0000065	17.24	0.33	4.21	6.16	0	CHEMBL5734901	SMYD3 Biochemical Assay: The assays were all performed in a buffer consisting of 25 mM Tris-Cl pH 8.0
CHEMBL5853996		None	388.51	0	2.44	BDBM432416	C[C@H]1CC(NC(=O)c2cc(C3CC3)on2)CCN1C(=O)CC1(C)CCNCC1	IC50	'='	472	nM	6.33		877299	UO_0000065	16.28	0.31	3.89	7.23	0	CHEMBL5734901	SMYD3 Biochemical Assay: The assays were all performed in a buffer consisting of 25 mM Tris-Cl pH 8.0
CHEMBL5999338		None	364.45	0	0.76	BDBM432434	C[C@H]1CC(NC(=O)c2cc(C3CC3)on2)CCN1C(=O)C[C@H](O)CCN	IC50	'='	6237	nM	5.21		877317	UO_0000065	14.28	0.27	4.45	4.28	0	CHEMBL5734901	SMYD3 Biochemical Assay: The assays were all performed in a buffer consisting of 25 mM Tris-Cl pH 8.0
CHEMBL6007671		None	388.51	0	2.43	BDBM432456	CC1(C)CN(C(=O)[C@H]2CC[C@H](N)CC2)CCC1NC(=O)c1cc(C2CC2)on1	IC50	'='	575	nM	6.24		877339	UO_0000065	16.06	0.3	3.81	6.15	0	CHEMBL5734901	SMYD3 Biochemical Assay: The assays were all performed in a buffer consisting of 25 mM Tris-Cl pH 8.0
CHEMBL6020678		None	390.48	0	0.88	BDBM432683	O=C(N[C@@H]1CCN(C(=O)CC2CCNCC2)C[C@H]1CO)c1cc(C2CC2)on1	IC50	'='	3022	nM	5.52		877566	UO_0000065	14.14	0.27	4.64	5.13	0	CHEMBL5734901	SMYD3 Biochemical Assay: The assays were all performed in a buffer consisting of 25 mM Tris-Cl pH 8.0
CHEMBL5850610		None	422.53	0	3.31	BDBM432779	C[C@@H]1C[C@H](NC(=O)c2cc(C3CC3)on2)CCN1C(=O)c1ccc(C2(N)CCC2)cc1	IC50	'='	289	nM	6.54		877662	UO_0000065	15.48	0.29	3.23	6.45	0	CHEMBL5734901	SMYD3 Biochemical Assay: The assays were all performed in a buffer consisting of 25 mM Tris-Cl pH 8.0
CHEMBL5817105		None	432.55	0	2.17	BDBM432780	NCCCS(=O)(=O)N1CCC(NC(=O)c2cc(C3CC3)on2)C[C@@H]1c1ccccc1	IC50	'='	65.8	nM	7.18		877663	UO_0000065	16.6	0.33	5.01	6.06	0	CHEMBL5734901	SMYD3 Biochemical Assay: The assays were all performed in a buffer consisting of 25 mM Tris-Cl pH 8.0
CHEMBL5874692		None	386.5	0	2.32	BDBM432786	N[C@H]1CC[C@@H](C(=O)N2[C@@H]3CC[C@H]2C[C@H](NC(=O)c2cc(C4CC4)on2)C3)CC1	IC50	'>'	10000	nM			877669	UO_0000065					0	CHEMBL5734901	SMYD3 Biochemical Assay: The assays were all performed in a buffer consisting of 25 mM Tris-Cl pH 8.0
CHEMBL5811889		None	398.53	0	1.45	BDBM432800	CC(C)[C@H]1C[C@H](NC(=O)c2cc(C3CC3)on2)CCN1S(=O)(=O)CCCN	IC50	'='	1064	nM	5.97		877683	UO_0000065	14.99	0.3	4.52	5.04	0	CHEMBL5734901	SMYD3 Biochemical Assay: The assays were all performed in a buffer consisting of 25 mM Tris-Cl pH 8.0
CHEMBL6063049		None	386.47	0	0.62	BDBM432802	COCCNS(=O)(=O)N1CC[C@@H](NC(=O)c2cc(C3CC3)on2)C[C@@H]1C	IC50	'>'	10000	nM			877685	UO_0000065					0	CHEMBL5734901	SMYD3 Biochemical Assay: The assays were all performed in a buffer consisting of 25 mM Tris-Cl pH 8.0
CHEMBL6029969		None	462.58	0	1.31	BDBM432805	C[C@@H]1C[C@@H](NC(=O)c2cc(C3CC3)on2)CCN1S(=O)(=O)c1ccc(N(C)CCN)nc1	IC50	'='	320	nM	6.5		877688	UO_0000065	14.04	0.28	5.18	4.82	0	CHEMBL5734901	SMYD3 Biochemical Assay: The assays were all performed in a buffer consisting of 25 mM Tris-Cl pH 8.0
CHEMBL5902317		None	499.64	0	2.95	BDBM432811	CC(C)CN(C)c1ccc(S(=O)(=O)C23CC4CC(NC(=O)c5cc(C6CC6)on5)CC(C2)N43)cn1	IC50	'>'	10000	nM			877694	UO_0000065					0	CHEMBL5734901	SMYD3 Biochemical Assay: The assays were all performed in a buffer consisting of 25 mM Tris-Cl pH 8.0
CHEMBL6001868		None	405.48	0	1.5	BDBM432819	C[C@H]1C[C@@H](NC(=O)c2cc(C3CC3)on2)CCN1S(=O)(=O)c1ccc(N)nc1	IC50	'='	407	nM	6.39		877702	UO_0000065	15.76	0.31	4.89	4.86	0	CHEMBL5734901	SMYD3 Biochemical Assay: The assays were all performed in a buffer consisting of 25 mM Tris-Cl pH 8.0
CHEMBL6062390		None	532.63	1	3.66	BDBM432825	O=C(N[C@H]1C[C@H]2CC[C@@H](C1)N2S(=O)(=O)CC1CCN(CCCC(F)(F)F)CC1)c1cc(C2CC2)on1	IC50	'='	0.6	nM	9.22		877708	UO_0000065	17.31	0.35	5.56	9.63	0	CHEMBL5734901	SMYD3 Biochemical Assay: The assays were all performed in a buffer consisting of 25 mM Tris-Cl pH 8.0
CHEMBL5920563		None	425.56	0	1.06	BDBM432832	CNC1CCN(S(=O)(=O)N2CC[C@H](NC(=O)c3cc(C4CC4)on3)C[C@@H]2C)CC1	IC50	'='	1.2	nM	8.92		877715	UO_0000065	20.96	0.42	7.86	8.28	0	CHEMBL5734901	SMYD3 Biochemical Assay: The assays were all performed in a buffer consisting of 25 mM Tris-Cl pH 8.0
CHEMBL5917319		None	422.55	0	1.88	BDBM432837	N[C@H]1CC[C@@H](S(=O)(=O)N2[C@@H]3CC[C@H]2C[C@@H](NC(=O)c2cc(C4CC4)on2)C3)CC1	IC50	'='	1.3	nM	8.89		877720	UO_0000065	21.03	0.42	7.01	7.5	0	CHEMBL5734901	SMYD3 Biochemical Assay: The assays were all performed in a buffer consisting of 25 mM Tris-Cl pH 8.0
CHEMBL5795246		None	494.66	0	2.36	BDBM432839	COCCCN1CCC(CS(=O)(=O)N2[C@@H]3CC[C@H]2C[C@@H](NC(=O)c2cc(C4CC4)on2)C3)CC1	IC50	'='	1.6	nM	8.8		877722	UO_0000065	17.78	0.35	6.44	8.38	0	CHEMBL5734901	SMYD3 Biochemical Assay: The assays were all performed in a buffer consisting of 25 mM Tris-Cl pH 8.0
CHEMBL5799951		None	424.55	0	3.41	BDBM432954	C[C@@H]1CN(C(=O)c2ccc(C(C)(C)N)cc2)[C@H](C)C[C@@H]1NC(=O)c1cc(C2CC2)on1	IC50	'='	63.4	nM	7.2		877837	UO_0000065	16.95	0.32	3.79	7.09	0	CHEMBL5734901	SMYD3 Biochemical Assay: The assays were all performed in a buffer consisting of 25 mM Tris-Cl pH 8.0
CHEMBL6047710		None	437.57	0	1.16	BDBM432862	C[C@H]1C[C@@H](NC(=O)c2cc(C3CC3)on2)CCN1S(=O)(=O)N1CC2CCC(C1)N2C	IC50	'='	6	nM	8.22		877745	UO_0000065	18.79	0.37	7.06	8.31	0	CHEMBL5734901	SMYD3 Biochemical Assay: The assays were all performed in a buffer consisting of 25 mM Tris-Cl pH 8.0
CHEMBL5825354		None	528.6	1	3.66	BDBM432863	C[C@H]1C[C@@H](NC(=O)c2cc(C3CC3)on2)CCN1S(=O)(=O)CCCNCc1ccc(C(F)(F)F)cc1	IC50	'='	6.1	nM	8.21		877746	UO_0000065	15.54	0.31	4.55	7.86	0	CHEMBL5734901	SMYD3 Biochemical Assay: The assays were all performed in a buffer consisting of 25 mM Tris-Cl pH 8.0
CHEMBL5852937		None	500.67	1	3.38	BDBM432870	C[C@@H]1C[C@H](NC(=O)c2cc(C3CC3)on2)CCN1S(=O)(=O)CC1CCN(Cc2ccccc2)CC1	IC50	'='	8	nM	8.1		877753	UO_0000065	16.17	0.32	4.72	8.46	0	CHEMBL5734901	SMYD3 Biochemical Assay: The assays were all performed in a buffer consisting of 25 mM Tris-Cl pH 8.0
CHEMBL5829125		None	517.05	1	3.14	BDBM378480	CC(C)(N)c1ccc(S(=O)(=O)N2[C@@H]3CC[C@H]2C[C@@H](NC(=O)c2cc4c(cc2Cl)NC(=O)C4)C3)cc1	IC50	'='	37.1	nM	7.43		756486	UO_0000065	14.37	0.29	4.29	6.11	0	CHEMBL5733491	SMYD3 Biochemical Assay: The assays were all performed in a buffer consisting of 25 mM Tris-Cl pH 8.0
CHEMBL6041171		None	388.51	0	2.42	BDBM432720	C[C@@H]1CN(C(=O)[C@H]2CC[C@H](N)CC2)[C@H](C)C[C@@H]1NC(=O)c1cc(C2CC2)on1	IC50	'='	11.3	nM	7.95		877603	UO_0000065	20.45	0.39	5.53	7.83	0	CHEMBL5734901	SMYD3 Biochemical Assay: The assays were all performed in a buffer consisting of 25 mM Tris-Cl pH 8.0
CHEMBL5810393		None	461.59	0	2.99	BDBM432751	CC(C)CNc1ccc(S(=O)(=O)N2CC[C@H](NC(=O)c3cc(C4CC4)on3)C[C@H]2C)cn1	IC50	'>'	10000	nM			877634	UO_0000065					0	CHEMBL5734901	SMYD3 Biochemical Assay: The assays were all performed in a buffer consisting of 25 mM Tris-Cl pH 8.0
CHEMBL5809735		None	324.45	0	1.16	BDBM378265	Cc1cnc(C(=O)NC(C)C2CCN(C(=O)[C@H](C)N)CC2)s1	IC50	'='	10610	nM	4.97		756271	UO_0000065	15.33	0.31	3.81	5.63	0	CHEMBL5733491	SMYD3 Biochemical Assay: The assays were all performed in a buffer consisting of 25 mM Tris-Cl pH 8.0
CHEMBL5932684		None	358.44	0	0.89	BDBM378268	CC(NC(=O)c1cccc2c1CC(=O)N2)C1CCN(C(=O)[C@H](C)N)CC1	IC50	'>'	100000	nM			756274	UO_0000065					0	CHEMBL5733491	SMYD3 Biochemical Assay: The assays were all performed in a buffer consisting of 25 mM Tris-Cl pH 8.0
CHEMBL5818990		None	286.33	0	1.79	BDBM378148	N[C@H]1CC[C@H](NC(=O)c2cc(=O)c3ccccc3o2)CC1	IC50	'>'	100000	nM			756154	UO_0000065					0	CHEMBL5733491	SMYD3 Biochemical Assay: The assays were all performed in a buffer consisting of 25 mM Tris-Cl pH 8.0
CHEMBL5980089		None	287.41	0	2.29	BDBM378151	N[C@H]1CC[C@H](NC(=O)c2ccc(N3CCCC3)cc2)CC1	IC50	'='	48030	nM	4.32		756157	UO_0000065	15.03	0.28	2.03	7.4	0	CHEMBL5733491	SMYD3 Biochemical Assay: The assays were all performed in a buffer consisting of 25 mM Tris-Cl pH 8.0
CHEMBL5979189		None	298.29	0	2.01	BDBM378155	N[C@H]1CC[C@H](NC(=O)c2ccc3c(c2)OC(F)(F)O3)CC1	IC50	'='	69120	nM	4.16		756161	UO_0000065	13.95	0.27	2.15	5.65	0	CHEMBL5733491	SMYD3 Biochemical Assay: The assays were all performed in a buffer consisting of 25 mM Tris-Cl pH 8.0
CHEMBL5836203		None	234.3	0	0.66	BDBM378159	Nc1ccncc1C(=O)N[C@H]1CC[C@H](N)CC1	IC50	'>'	100000	nM			756165	UO_0000065					0	CHEMBL5733491	SMYD3 Biochemical Assay: The assays were all performed in a buffer consisting of 25 mM Tris-Cl pH 8.0
CHEMBL6016742		None	234.3	0	0.78	BDBM378058	Cc1cnc(C(=O)N[C@H]2CC[C@H](N)CC2)cn1	IC50	'>'	100000	nM			756064	UO_0000065					0	CHEMBL5733491	SMYD3 Biochemical Assay: The assays were all performed in a buffer consisting of 25 mM Tris-Cl pH 8.0
CHEMBL5830789		None	219.29	0	1.08	BDBM378122	N[C@H]1CC[C@H](NC(=O)c2ccccn2)CC1	IC50	'>'	100000	nM			756128	UO_0000065					0	CHEMBL5733491	SMYD3 Biochemical Assay: The assays were all performed in a buffer consisting of 25 mM Tris-Cl pH 8.0
CHEMBL6043341		None	307.4	0	0.12	BDBM378130	CC(NC(=O)c1ccn(C)n1)C1CCN(C(=O)[C@H](C)N)CC1	IC50	'>'	100000	nM			756136	UO_0000065					0	CHEMBL5733491	SMYD3 Biochemical Assay: The assays were all performed in a buffer consisting of 25 mM Tris-Cl pH 8.0
CHEMBL5863786		None	324.47	0	0.59	BDBM378133	CC(NC(=O)[C@H]1CC[C@H](N)CC1)C1CCN(C(=O)[C@H](C)N)CC1	IC50	'>'	100000	nM			756139	UO_0000065					0	CHEMBL5733491	SMYD3 Biochemical Assay: The assays were all performed in a buffer consisting of 25 mM Tris-Cl pH 8.0
CHEMBL6003280		None	343.43	0	1.27	BDBM378065	CC(NC(=O)c1ccc2nc[nH]c2c1)C1CCN(C(=O)[C@H](C)N)CC1	IC50	'>'	100000	nM			756071	UO_0000065					0	CHEMBL5733491	SMYD3 Biochemical Assay: The assays were all performed in a buffer consisting of 25 mM Tris-Cl pH 8.0
CHEMBL5779218		None	342.44	0	1.6	BDBM378067	NCCC(=O)N[C@H]1CC[C@H](NC(=O)Cc2c[nH]c3ccccc23)CC1	IC50	'>'	100000	nM			756073	UO_0000065					0	CHEMBL5733491	SMYD3 Biochemical Assay: The assays were all performed in a buffer consisting of 25 mM Tris-Cl pH 8.0
CHEMBL6056642		None	250.32	0	1.75	BDBM378080	N[C@H]1CC[C@H](NC(=O)Cc2ccc(F)cc2)CC1	IC50	'>'	100000	nM			756086	UO_0000065					0	CHEMBL5733491	SMYD3 Biochemical Assay: The assays were all performed in a buffer consisting of 25 mM Tris-Cl pH 8.0
CHEMBL5631984		None	362.44	0	2.01	39	NCc1ccc(Nc2ncnc3cc(C(=O)N4CCC(N)C4)ccc23)cc1	IC50	'>'	200000	nM		Outside typical range		UO_0000065					0	CHEMBL5628408	Displacement of 3H-SAM from SMYD3 (unknown origin) using biotinylated-MAP3K2 as substrate incubated for 45 mins by SPA assay	B	BAO_0000357	single protein format	Homo sapiens	None	None	None	None				CHEMBL2321643	Histone-lysine N-methyltransferase SMYD3	Homo sapiens	SINGLE PROTEIN	CHEMBL5625232	1	Scientific Literature	Eur J Med Chem	2023	None	TIME = 0.75 hr			200
CHEMBL6042355		None	370.48	0	0.81	BDBM432489	C[C@H]1C[C@H](NC(=O)c2cc(C3CC3)on2)CCN1S(=O)(=O)CCCN	IC50	'='	72.3	nM	7.14		877372	UO_0000065	19.27	0.39	6.33	6.02	0	CHEMBL5734901	SMYD3 Biochemical Assay: The assays were all performed in a buffer consisting of 25 mM Tris-Cl pH 8.0
CHEMBL5813906		None	432.52	0	1.72	BDBM432493	CCOC(=O)[C@@H]1CC(NC(=O)c2cc(C3CC3)on2)CCN1C(=O)[C@H]1CC[C@H](N)CC1	IC50	'='	7083	nM	5.15		877376	UO_0000065	11.91	0.23	3.43	4.03	0	CHEMBL5734901	SMYD3 Biochemical Assay: The assays were all performed in a buffer consisting of 25 mM Tris-Cl pH 8.0
CHEMBL5880073		None	422.55	0	1.61	BDBM432840	O=C(N[C@H]1C[C@H]2CC[C@@H](C1)N2S(=O)(=O)CC1CCNCC1)c1cc(C2CC2)on1	IC50	'='	1.8	nM	8.74		877723	UO_0000065	20.7	0.41	7.13	8.36	0	CHEMBL5734901	SMYD3 Biochemical Assay: The assays were all performed in a buffer consisting of 25 mM Tris-Cl pH 8.0
CHEMBL5783250		None	439.58	0	1.41	BDBM432842	C[C@H]1C[C@@H](NC(=O)c2cc(C3CC3)on2)CCN1S(=O)(=O)N1CCC(N(C)C)CC1	IC50	'='	2	nM	8.7		877725	UO_0000065	19.79	0.4	7.29	8.79	0	CHEMBL5734901	SMYD3 Biochemical Assay: The assays were all performed in a buffer consisting of 25 mM Tris-Cl pH 8.0
CHEMBL5748977		None	510.66	1	3.8	BDBM432875	C[C@H]1C[C@@H](NC(=O)c2cc(C3CC3)on2)CCN1S(=O)(=O)CCCNCc1ccc2ccccc2c1	IC50	'='	9.4	nM	8.03		877758	UO_0000065	15.72	0.3	4.23	7.68	0	CHEMBL5734901	SMYD3 Biochemical Assay: The assays were all performed in a buffer consisting of 25 mM Tris-Cl pH 8.0
CHEMBL5882584		None	410.54	0	1.56	BDBM432871	C[C@H]1C[C@@H](NC(=O)c2cc(C3CC3)on2)CCN1S(=O)(=O)C1CCN(C)CC1	IC50	'='	8	nM	8.1		877754	UO_0000065	19.72	0.39	6.54	8.46	0	CHEMBL5734901	SMYD3 Biochemical Assay: The assays were all performed in a buffer consisting of 25 mM Tris-Cl pH 8.0
CHEMBL5899002		None	423.54	0	0.82	BDBM432874	C[C@H]1C[C@@H](NC(=O)c2cc(C3CC3)on2)CCN1S(=O)(=O)N1CC2CCC1CN2	IC50	'='	9.2	nM	8.04		877757	UO_0000065	18.97	0.38	7.22	7.46	0	CHEMBL5734901	SMYD3 Biochemical Assay: The assays were all performed in a buffer consisting of 25 mM Tris-Cl pH 8.0
CHEMBL5989895		None	273.34	0	1.18	BDBM377909	N[C@H]1CC[C@H](NC(=O)c2ccc3c(c2)CC(=O)N3)CC1	IC50	'='	2840	nM	5.55		755921	UO_0000065	20.29	0.38	4.37	6.59	0	CHEMBL5733491	SMYD3 Biochemical Assay: The assays were all performed in a buffer consisting of 25 mM Tris-Cl pH 8.0
CHEMBL6023356		None	246.35	0	2.25	BDBM377887	CCc1ccc(C(=O)N[C@H]2CC[C@H](N)CC2)cc1	IC50	'='	125300	nM		Outside typical range	755899	UO_0000065					0	CHEMBL5733491	SMYD3 Biochemical Assay: The assays were all performed in a buffer consisting of 25 mM Tris-Cl pH 8.0
CHEMBL5946620		None	289.33	0	1.02	BDBM377889	N[C@H]1CC[C@H](NC(=O)c2ccc3c(c2)NC(=O)CO3)CC1	IC50	'='	16030	nM	4.79		755901	UO_0000065	16.57	0.31	3.78	5.13	0	CHEMBL5733491	SMYD3 Biochemical Assay: The assays were all performed in a buffer consisting of 25 mM Tris-Cl pH 8.0
CHEMBL5756702		None	319.41	0	0.11	BDBM378185	CC(NC(=O)Cc1cncnc1)C1CCN(C(=O)[C@H](C)N)CC1	IC50	'>'	100000	nM			756191	UO_0000065					0	CHEMBL5733491	SMYD3 Biochemical Assay: The assays were all performed in a buffer consisting of 25 mM Tris-Cl pH 8.0
CHEMBL5815928		None	234.3	0	0.66	BDBM378192	Nc1cc(C(=O)N[C@H]2CC[C@H](N)CC2)ccn1	IC50	'>'	100000	nM			756198	UO_0000065					0	CHEMBL5733491	SMYD3 Biochemical Assay: The assays were all performed in a buffer consisting of 25 mM Tris-Cl pH 8.0
CHEMBL5752616		None	391.45	0	0.95	BDBM377875	CC(=O)Nc1ccc(S(=O)(=O)N2CCC(NC(=O)c3cc[nH]n3)CC2)cc1	IC50	'>'	100000	nM			755887	UO_0000065					0	CHEMBL5733491	SMYD3 Biochemical Assay: The assays were all performed in a buffer consisting of 25 mM Tris-Cl pH 8.0
CHEMBL6005127		None	249.32	0	0.61	BDBM377880	N[C@H]1CC[C@H](NC(=O)c2cn(C3CC3)nn2)CC1	IC50	'='	15370	nM	4.81		755892	UO_0000065	19.31	0.37	4.2	5.61	0	CHEMBL5733491	SMYD3 Biochemical Assay: The assays were all performed in a buffer consisting of 25 mM Tris-Cl pH 8.0
CHEMBL5791085		None	345.4	0	0.84	BDBM377994	CCOC(=O)C(NC(=O)c1ccc2c(c1)CC(=O)N2)C1CCNCC1	IC50	'='	42260	nM	4.37		756002	UO_0000065	12.66	0.24	3.53	4.53	0	CHEMBL5733491	SMYD3 Biochemical Assay: The assays were all performed in a buffer consisting of 25 mM Tris-Cl pH 8.0
CHEMBL5994155		None	370.46	0	1.08	BDBM378270	Cc1c(C(=O)N[C@H]2CC[C@H](NC(=O)CCN)CC2)nnn1-c1ccccc1	IC50	'>'	100000	nM			756276	UO_0000065					0	CHEMBL5733491	SMYD3 Biochemical Assay: The assays were all performed in a buffer consisting of 25 mM Tris-Cl pH 8.0
CHEMBL5867751		None	314.39	0	1.8	BDBM378272	CC1=NN(c2ccc(C(=O)N[C@H]3CC[C@H](N)CC3)cc2)C(=O)C1	IC50	'>'	100000	nM			756278	UO_0000065					0	CHEMBL5733491	SMYD3 Biochemical Assay: The assays were all performed in a buffer consisting of 25 mM Tris-Cl pH 8.0
CHEMBL5759669		None	259.31	0	0.96	BDBM378366	N[C@H]1CC[C@H](NC(=O)c2cc3cn[nH]c3cn2)CC1	IC50	'='	35730	nM	4.45		756372	UO_0000065	17.15	0.32	3.49	4.6	0	CHEMBL5733491	SMYD3 Biochemical Assay: The assays were all performed in a buffer consisting of 25 mM Tris-Cl pH 8.0
CHEMBL5820763		None	364.45	0	1.94	BDBM378368	NCCC(=O)N[C@H]1CC[C@H](NC(=O)c2nc3ccc(F)cc3s2)CC1	IC50	'='	86270	nM	4.06		756374	UO_0000065	11.15	0.22	2.12	4.19	0	CHEMBL5733491	SMYD3 Biochemical Assay: The assays were all performed in a buffer consisting of 25 mM Tris-Cl pH 8.0
CHEMBL6051032		None	344.42	0	0.69	BDBM378374	NCCC(=O)N[C@H]1CC[C@H](NC(=O)c2cccc3c2NC(=O)C3)CC1	IC50	'='	16100	nM	4.79		756380	UO_0000065	13.92	0.26	4.1	4.23	0	CHEMBL5733491	SMYD3 Biochemical Assay: The assays were all performed in a buffer consisting of 25 mM Tris-Cl pH 8.0
CHEMBL6045732		None	273.34	0	1.18	BDBM378375	NC1CCC(NC(=O)c2cccc3c2NC(=O)C3)CC1	IC50	'='	42250	nM	4.37		756381	UO_0000065	16	0.3	3.19	5.19	0	CHEMBL5733491	SMYD3 Biochemical Assay: The assays were all performed in a buffer consisting of 25 mM Tris-Cl pH 8.0
CHEMBL5745005		None	297.34	0	0.44	BDBM321287	C=CS(=O)(=O)N1CC(NC(=O)c2cc(C3CC3)on2)C1	IC50	'>'	10000	nM			912544	UO_0000065					1	CHEMBL5735277	SMYD3 Enzyme Assays on MEKK2 Protein Substrate : The assays were an performed in a buffer consisting of 25 mM Tris-Cl pH 8.0
CHEMBL5957764		None	335.45	0	0.75	BDBM378112	CC(NC(=O)CCCn1ccnc1)C1CCN(C(=O)[C@H](C)N)CC1	IC50	'='	82880	nM	4.08		756118	UO_0000065	12.17	0.23	3.33	4.38	0	CHEMBL5733491	SMYD3 Biochemical Assay: The assays were all performed in a buffer consisting of 25 mM Tris-Cl pH 8.0
CHEMBL5830501		None	333.39	0	0.92	BDBM378019	NCCC(=O)N[C@H]1CC[C@H](NC(=O)c2ccc3c(c2)OCO3)CC1	IC50	'='	98150	nM	4.01		756025	UO_0000065	12.02	0.23	3.09	3.9	0	CHEMBL5733491	SMYD3 Biochemical Assay: The assays were all performed in a buffer consisting of 25 mM Tris-Cl pH 8.0
CHEMBL5965122		None	294.4	0	3.35	BDBM378027	N[C@H]1CC[C@H](NC(=O)c2ccc(-c3ccccc3)cc2)CC1	IC50	'='	79210	nM	4.1		756033	UO_0000065	13.93	0.25	0.75	7.44	0	CHEMBL5733491	SMYD3 Biochemical Assay: The assays were all performed in a buffer consisting of 25 mM Tris-Cl pH 8.0
CHEMBL5792866		None	368.46	0	-0.16	BDBM378028	NCCC(=O)N[C@H]1CC[C@H](NC(=O)c2ccc(S(N)(=O)=O)cc2)CC1	IC50	'>'	100000	nM			756034	UO_0000065					0	CHEMBL5733491	SMYD3 Biochemical Assay: The assays were all performed in a buffer consisting of 25 mM Tris-Cl pH 8.0
CHEMBL6020448		None	269.35	0	2.23	BDBM378036	N[C@H]1CC[C@H](NC(=O)c2ccc3ccccc3n2)CC1	IC50	'>'	100000	nM			756042	UO_0000065					0	CHEMBL5733491	SMYD3 Biochemical Assay: The assays were all performed in a buffer consisting of 25 mM Tris-Cl pH 8.0
CHEMBL5875302		None	528.6	1	3.66	BDBM432906	C[C@H]1C[C@@H](NC(=O)c2cc(C3CC3)on2)CCN1S(=O)(=O)CCCNCc1cccc(C(F)(F)F)c1	IC50	'='	18.8	nM	7.73		877789	UO_0000065	14.62	0.29	4.07	7.39	0	CHEMBL5734901	SMYD3 Biochemical Assay: The assays were all performed in a buffer consisting of 25 mM Tris-Cl pH 8.0
CHEMBL5975211		None	424.57	0	1.71	BDBM432926	C[C@@H]1CN(S(=O)(=O)CC2CCNCC2)[C@H](C)C[C@@H]1NC(=O)c1cc(C2CC2)on1	IC50	'='	28.2	nM	7.55		877809	UO_0000065	17.78	0.36	5.84	7.22	0	CHEMBL5734901	SMYD3 Biochemical Assay: The assays were all performed in a buffer consisting of 25 mM Tris-Cl pH 8.0
CHEMBL5911125		None	435.55	0	0.91	BDBM432879	CN1C2CC1CN(S(=O)(=O)N1[C@@H]3CC[C@H]1C[C@@H](NC(=O)c1cc(C4CC4)on1)C3)C2	IC50	'='	10.1	nM	8		877762	UO_0000065	18.36	0.36	7.09	8.08	0	CHEMBL5734901	SMYD3 Biochemical Assay: The assays were all performed in a buffer consisting of 25 mM Tris-Cl pH 8.0
CHEMBL5975361		None	411.53	0	0.67	BDBM432882	C[C@H]1C[C@@H](NC(=O)c2cc(C3CC3)on2)CCN1S(=O)(=O)N1CCCNCC1	IC50	'='	10.6	nM	7.97		877765	UO_0000065	19.38	0.39	7.3	7.4	0	CHEMBL5734901	SMYD3 Biochemical Assay: The assays were all performed in a buffer consisting of 25 mM Tris-Cl pH 8.0
CHEMBL5934260		None	425.56	0	0.42	BDBM432902	CNCCNCCS(=O)(=O)N1[C@@H]2CC[C@H]1C[C@@H](NC(=O)c1cc(C3CC3)on1)C2	IC50	'='	17.5	nM	7.76		877785	UO_0000065	18.23	0.37	7.34	6.65	0	CHEMBL5734901	SMYD3 Biochemical Assay: The assays were all performed in a buffer consisting of 25 mM Tris-Cl pH 8.0
CHEMBL5912971		None	437.57	0	1.21	BDBM432933	CCC1CN(S(=O)(=O)N2[C@@H]3CC[C@H]2C[C@@H](NC(=O)c2cc(C4CC4)on2)C3)CCN1	IC50	'='	33.2	nM	7.48		877816	UO_0000065	17.09	0.34	6.27	6.94	0	CHEMBL5734901	SMYD3 Biochemical Assay: The assays were all performed in a buffer consisting of 25 mM Tris-Cl pH 8.0
CHEMBL5919276		None	426.58	0	2.1	BDBM432937	CC(C)CNCCCS(=O)(=O)N1CC[C@H](NC(=O)c2cc(C3CC3)on2)C[C@@H]1C	IC50	'='	35.7	nM	7.45		877820	UO_0000065	17.46	0.35	5.35	7.12	0	CHEMBL5734901	SMYD3 Biochemical Assay: The assays were all performed in a buffer consisting of 25 mM Tris-Cl pH 8.0
CHEMBL5816070		None	439.54	0	-0.21	BDBM432940	O=C(N[C@H]1C[C@H]2CC[C@@H](C1)N2S(=O)(=O)N1CCNC(CO)C1)c1cc(C2CC2)on1	IC50	'='	37.8	nM	7.42		877823	UO_0000065	16.89	0.34	7.63	5.8	0	CHEMBL5734901	SMYD3 Biochemical Assay: The assays were all performed in a buffer consisting of 25 mM Tris-Cl pH 8.0
CHEMBL6023071		None	536.7	1	4.23	BDBM432942	C[C@H]1C[C@@H](NC(=O)c2cc(C3CC3)on2)CCN1S(=O)(=O)CCCNC(c1ccccc1)c1ccccc1	IC50	'='	44.4	nM	7.35		877825	UO_0000065	13.7	0.26	3.12	7.03	0	CHEMBL5734901	SMYD3 Biochemical Assay: The assays were all performed in a buffer consisting of 25 mM Tris-Cl pH 8.0
CHEMBL5827035		None	482.65	0	2.07	BDBM432945	COCCCN1CCC(CS(=O)(=O)N2CC[C@@H](NC(=O)c3cc(C4CC4)on3)[C@@H](C)C2)CC1	IC50	'='	46.8	nM	7.33		877828	UO_0000065	15.19	0.3	5.26	6.98	0	CHEMBL5734901	SMYD3 Biochemical Assay: The assays were all performed in a buffer consisting of 25 mM Tris-Cl pH 8.0
CHEMBL5905000		None	465.62	0	1.24	BDBM432948	CN(C)C1CCN(CCS(=O)(=O)N2[C@@H]3CC[C@H]2C[C@@H](NC(=O)c2cc(C4CC4)on2)C3)C1	IC50	'='	50.6	nM	7.3		877831	UO_0000065	15.67	0.31	6.06	7.37	0	CHEMBL5734901	SMYD3 Biochemical Assay: The assays were all performed in a buffer consisting of 25 mM Tris-Cl pH 8.0
CHEMBL5942785		None	451.59	0	1.55	BDBM432953	CN1CCN(S(=O)(=O)N2[C@@H]3CC[C@H]2C[C@@H](NC(=O)c2cc(C4CC4)on2)C3)CC1(C)C	IC50	'='	59.8	nM	7.22		877836	UO_0000065	16	0.32	5.67	7.3	0	CHEMBL5734901	SMYD3 Biochemical Assay: The assays were all performed in a buffer consisting of 25 mM Tris-Cl pH 8.0
CHEMBL5867974		None	454.59	0	1.58	BDBM432962	COCCN(C)CCCS(=O)(=O)N1[C@@H]2CC[C@H]1C[C@@H](NC(=O)c1cc(C3CC3)on1)C2	IC50	'='	86.8	nM	7.06		877845	UO_0000065	15.53	0.31	5.48	6.73	0	CHEMBL5734901	SMYD3 Biochemical Assay: The assays were all performed in a buffer consisting of 25 mM Tris-Cl pH 8.0
CHEMBL5966895		None	436.58	0	2	BDBM432970	O=C(N[C@H]1C[C@H]2CCC[C@@H](C1)N2S(=O)(=O)CC1CCNCC1)c1cc(C2CC2)on1	IC50	'='	106	nM	6.97		877853	UO_0000065	15.98	0.32	4.97	6.67	0	CHEMBL5734901	SMYD3 Biochemical Assay: The assays were all performed in a buffer consisting of 25 mM Tris-Cl pH 8.0
CHEMBL5827899		None	513.66	1	2.78	BDBM433106	O=C(N[C@H]1C[C@H]2CC[C@@H](C1)N2S(=O)(=O)N1CCC(NCc2ccccc2)CC1)c1cc(C2CC2)on1	IC50	'='	2.53	nM	8.6		877989	UO_0000065	16.74	0.33	5.82	7.98	0	CHEMBL5734901	SMYD3 Biochemical Assay: The assays were all performed in a buffer consisting of 25 mM Tris-Cl pH 8.0
CHEMBL5815821		None	451.59	0	1.6	BDBM432975	CN(C1CCNCC1)S(=O)(=O)N1[C@@H]2CCC[C@H]1C[C@@H](NC(=O)c1cc(C3CC3)on1)C2	IC50	'='	113	nM	6.95		877858	UO_0000065	15.38	0.31	5.35	6.45	0	CHEMBL5734901	SMYD3 Biochemical Assay: The assays were all performed in a buffer consisting of 25 mM Tris-Cl pH 8.0
CHEMBL5979523		None	451.59	0	1.6	BDBM432984	CN(C1CCNCC1)S(=O)(=O)N1[C@@H]2CCC[C@H]1C[C@H](NC(=O)c1cc(C3CC3)on1)C2	IC50	'='	130	nM	6.89		877867	UO_0000065	15.25	0.3	5.29	6.39	0	CHEMBL5734901	SMYD3 Biochemical Assay: The assays were all performed in a buffer consisting of 25 mM Tris-Cl pH 8.0
CHEMBL5665394		None	407.51	0	4.29	Compound 9	CCCCCNC(=O)c1ccc2c(c1)NC(=O)CC(C)N2C(=O)c1ccc(C)cc1	IC50	'='	22000	nM	4.66			UO_0000065	11.43	0.21	0.37	5.93	0	CHEMBL5665262	Binding affinity to recombinant human SMYD3 expressed in Escherichia coli assessed as catalytic inhibition using DYDNPIFEKFGKGGTYPRRYHVSYHGK-Biotin as substrate by scintillation proximity assay	B	BAO_0000019	assay format	Homo sapiens	None	None	None	None	EFO_ID: MONDO:0004992 | EFO_TERM: cancer			CHEMBL2321643	Histone-lysine N-methyltransferase SMYD3	Homo sapiens	SINGLE PROTEIN	CHEMBL5661986	72	Chemical Probe data from Scientific Literature	SLAS Discov	2021	None		INHIBITOR		2.2
CHEMBL5665389		None	427.55	0	2.51	Compound 21	CCN1CCN(C(=O)N2c3ccc(C(=O)NCCC4CC4)cc3NC(=O)C[C@@H]2C)CC1	IC50	'='	459	nM	6.34			UO_0000065	14.82	0.28	3.83	7.46	0	CHEMBL5665262	Binding affinity to recombinant human SMYD3 expressed in Escherichia coli assessed as catalytic inhibition using DYDNPIFEKFGKGGTYPRRYHVSYHGK-Biotin as substrate by scintillation proximity assay	B	BAO_0000019	assay format	Homo sapiens	None	None	None	None	EFO_ID: MONDO:0004992 | EFO_TERM: cancer			CHEMBL2321643	Histone-lysine N-methyltransferase SMYD3	Homo sapiens	SINGLE PROTEIN	CHEMBL5661986	72	Chemical Probe data from Scientific Literature	SLAS Discov	2021	None		INHIBITOR		4.59
CHEMBL5665362		None	427.55	0	2.56	Compound 23	C[C@H]1CC(=O)Nc2cc(C(=O)NCCC3CC3)ccc2N1C(=O)N(C)C1CCNCC1	IC50	'='	493	nM	6.31			UO_0000065	14.75	0.28	3.75	6.73	0	CHEMBL5665262	Binding affinity to recombinant human SMYD3 expressed in Escherichia coli assessed as catalytic inhibition using DYDNPIFEKFGKGGTYPRRYHVSYHGK-Biotin as substrate by scintillation proximity assay	B	BAO_0000019	assay format	Homo sapiens	None	None	None	None	EFO_ID: MONDO:0004992 | EFO_TERM: cancer			CHEMBL2321643	Histone-lysine N-methyltransferase SMYD3	Homo sapiens	SINGLE PROTEIN	CHEMBL5661986	72	Chemical Probe data from Scientific Literature	SLAS Discov	2021	None		INHIBITOR		4.93
CHEMBL6041405		None	438.59	0	2.2	BDBM433249	CC[C@H]1C[C@@H](NC(=O)c2cc(C3CC3)on2)CCN1S(=O)(=O)CC1CCN(C)CC1	IC50	'='	57.9	nM	7.24		878132	UO_0000065	16.5	0.33	5.04	7.56	0	CHEMBL5734901	SMYD3 Biochemical Assay: The assays were all performed in a buffer consisting of 25 mM Tris-Cl pH 8.0
CHEMBL5936593		None	436.58	0	2.09	BDBM433271	CN1CCCC[C@H]1CS(=O)(=O)N1[C@@H]2CC[C@H]1C[C@@H](NC(=O)c1cc(C3CC3)on1)C2	IC50	'='	105	nM	6.98		878154	UO_0000065	15.99	0.32	4.89	7.29	0	CHEMBL5734901	SMYD3 Biochemical Assay: The assays were all performed in a buffer consisting of 25 mM Tris-Cl pH 8.0
CHEMBL5753505		None	464.63	0	2.73	BDBM433083	CC(C)N1CCC(CS(=O)(=O)N2[C@@H]3CC[C@H]2C[C@@H](NC(=O)c2cc(C4CC4)on2)C3)CC1	IC50	'='	1.38	nM	8.86		877966	UO_0000065	19.07	0.38	6.13	9.25	0	CHEMBL5734901	SMYD3 Biochemical Assay: The assays were all performed in a buffer consisting of 25 mM Tris-Cl pH 8.0
CHEMBL3798717		None	259.31	0	0.66	1	O=C1Cc2cc(C(=O)NC3CCNCC3)ccc2N1	IC50	'>'	10000	nM				UO_0000065					0	CHEMBL3803120	Inhibition of human SMYD3 expressed in HEK293T/17 cells using FLAG-tagged MEKK2 as substrate incubated for 30 mins in low air flow area followed by incubation for 24 hrs at 37 degC by Western blot analysis	B	BAO_0000219	cell-based format	Homo sapiens	None	None	HEK-293T	None				CHEMBL2321643	Histone-lysine N-methyltransferase SMYD3	Homo sapiens	SINGLE PROTEIN	CHEMBL3797202	1	Scientific Literature	ACS Med Chem Lett	2016	CHEMBL3706569				10000
CHEMBL5963901		None	209.25	0	-0.2	BDBM377998	N[C@H]1CC[C@H](NC(=O)c2nnc[nH]2)CC1	IC50	'='	16440	nM	4.78		756006	UO_0000065	22.86	0.44	4.98	4.95	0	CHEMBL5733491	SMYD3 Biochemical Assay: The assays were all performed in a buffer consisting of 25 mM Tris-Cl pH 8.0
CHEMBL5744277		None	416.48	0	0.43	BDBM378002	CCOC(=O)C1(CNC(=O)c2ccc3c(c2)CC(=O)N3)CCN(C(=O)[C@H](C)N)CC1	IC50	'='	940	nM	6.03		756010	UO_0000065	14.47	0.27	5.6	4.61	0	CHEMBL5733491	SMYD3 Biochemical Assay: The assays were all performed in a buffer consisting of 25 mM Tris-Cl pH 8.0
CHEMBL5964612		None	272.31	0	0.4	BDBM377914	O=C(NC1CCNCC1)c1ccc2ncc(=O)[nH]c2c1	IC50	'='	63740	nM	4.2		755926	UO_0000065	15.41	0.29	3.8	4.83	0	CHEMBL5733491	SMYD3 Biochemical Assay: The assays were all performed in a buffer consisting of 25 mM Tris-Cl pH 8.0
CHEMBL5813096		None	339.44	0	3.08	BDBM377948	CCC(=O)c1c[nH]c(C(=O)NC(c2ccccc2)C2CCNCC2)c1	IC50	'='	10040	nM	5		755957	UO_0000065	14.73	0.27	1.92	6.76	0	CHEMBL5733491	SMYD3 Biochemical Assay: The assays were all performed in a buffer consisting of 25 mM Tris-Cl pH 8.0
CHEMBL6032835		None	319.36	0	1.03	BDBM377956	COc1cc(C(=O)N[C@H]2CC[C@H](N)CC2)cc2c1OCC(=O)N2	IC50	'='	184090	nM		Outside typical range	755965	UO_0000065					0	CHEMBL5733491	SMYD3 Biochemical Assay: The assays were all performed in a buffer consisting of 25 mM Tris-Cl pH 8.0
CHEMBL6049364		None	360.41	0	0.83	BDBM377965	CC(NC(=O)c1ccc2[nH]c(=O)oc2c1)C1CCN(C(=O)[C@H](C)N)CC1	IC50	'='	3940	nM	5.41		755974	UO_0000065	15	0.28	4.57	4.45	0	CHEMBL5733491	SMYD3 Biochemical Assay: The assays were all performed in a buffer consisting of 25 mM Tris-Cl pH 8.0
CHEMBL5812926		None	289.34	0	1.46	BDBM321291	C=CC(=O)N1CCC(NC(=O)c2cc(C3CC3)on2)CC1	IC50	'>'	100000	nM			630418	UO_0000065					0	CHEMBL5732212	SMYD3 biochemical assay: The assays were all performed in a buffer consisting of 25 mM Tris-Cl pH 8.0
CHEMBL5851404		None	237.3	0	1.24	BDBM377885	CCc1nc(C(=O)N[C@H]2CC[C@H](N)CC2)co1	IC50	'='	128430	nM		Outside typical range	755897	UO_0000065					0	CHEMBL5733491	SMYD3 Biochemical Assay: The assays were all performed in a buffer consisting of 25 mM Tris-Cl pH 8.0
CHEMBL5905906		None	436.51	0	1.43	BDBM377973	N[C@@H](Cc1ccc(O)cc1)C(=O)N1CCC(CNC(=O)c2ccc3c(c2)CC(=O)N3)CC1	IC50	'='	1860	nM	5.73		755982	UO_0000065	13.13	0.24	4.3	4.59	0	CHEMBL5733491	SMYD3 Biochemical Assay: The assays were all performed in a buffer consisting of 25 mM Tris-Cl pH 8.0
CHEMBL5949459		None	459.55	0	2.2	BDBM377974	N[C@@H](Cc1c[nH]c2ccccc12)C(=O)N1CCC(CNC(=O)c2ccc3c(c2)CC(=O)N3)CC1	IC50	'='	2740	nM	5.56		755983	UO_0000065	12.1	0.22	3.36	4.62	0	CHEMBL5733491	SMYD3 Biochemical Assay: The assays were all performed in a buffer consisting of 25 mM Tris-Cl pH 8.0
CHEMBL5830429		None	330.39	0	0.11	BDBM378004	C[C@H](N)C(=O)N1CC[C@@H](CNC(=O)c2ccc3c(c2)CC(=O)N3)C1	IC50	'='	10200	nM	4.99		756012	UO_0000065	15.11	0.28	4.88	4.78	0	CHEMBL5733491	SMYD3 Biochemical Assay: The assays were all performed in a buffer consisting of 25 mM Tris-Cl pH 8.0
CHEMBL5812670		None	304.39	0	0.79	BDBM378010	CC(NC(=O)c1ccncc1)C1CCN(C(=O)[C@H](C)N)CC1	IC50	'>'	100000	nM			756016	UO_0000065					0	CHEMBL5733491	SMYD3 Biochemical Assay: The assays were all performed in a buffer consisting of 25 mM Tris-Cl pH 8.0
CHEMBL6033157		None	304.39	0	0.79	BDBM378013	CC(NC(=O)c1cccnc1)C1CCN(C(=O)[C@H](C)N)CC1	IC50	'>'	100000	nM			756019	UO_0000065					0	CHEMBL5733491	SMYD3 Biochemical Assay: The assays were all performed in a buffer consisting of 25 mM Tris-Cl pH 8.0
CHEMBL5931819		None	367.47	0	0.6	BDBM378022	CS(=O)(=O)c1cccc(C(=O)N[C@H]2CC[C@H](NC(=O)CCN)CC2)c1	IC50	'>'	100000	nM			756028	UO_0000065					0	CHEMBL5733491	SMYD3 Biochemical Assay: The assays were all performed in a buffer consisting of 25 mM Tris-Cl pH 8.0
CHEMBL5970109		None	365.48	0	2.86	BDBM378026	NCCC(=O)N[C@H]1CC[C@H](NC(=O)c2ccc(-c3ccccc3)cc2)CC1	IC50	'='	37310	nM	4.43		756032	UO_0000065	12.12	0.22	1.57	5.26	0	CHEMBL5733491	SMYD3 Biochemical Assay: The assays were all performed in a buffer consisting of 25 mM Tris-Cl pH 8.0
CHEMBL6063891		None	237.28	0	1.22	BDBM378031	N[C@H]1CC[C@H](NC(=O)c2cncc(F)c2)CC1	IC50	'>'	100000	nM			756037	UO_0000065					0	CHEMBL5733491	SMYD3 Biochemical Assay: The assays were all performed in a buffer consisting of 25 mM Tris-Cl pH 8.0
CHEMBL5860932		None	258.32	0	1.56	BDBM378033	N[C@H]1CC[C@H](NC(=O)c2ccc3nc[nH]c3c2)CC1	IC50	'>'	100000	nM			756039	UO_0000065					0	CHEMBL5733491	SMYD3 Biochemical Assay: The assays were all performed in a buffer consisting of 25 mM Tris-Cl pH 8.0
CHEMBL5800477		None	340.43	0	1.74	BDBM378035	NCCC(=O)N[C@H]1CC[C@H](NC(=O)c2ccc3ccccc3n2)CC1	IC50	'>'	100000	nM			756041	UO_0000065					0	CHEMBL5733491	SMYD3 Biochemical Assay: The assays were all performed in a buffer consisting of 25 mM Tris-Cl pH 8.0
CHEMBL5826391		None	330.39	0	0.11	BDBM378049	C[C@@H](N)C(=O)N1CC[C@H](CNC(=O)c2ccc3c(c2)CC(=O)N3)C1	IC50	'='	19780	nM	4.7		756055	UO_0000065	14.24	0.27	4.59	4.5	0	CHEMBL5733491	SMYD3 Biochemical Assay: The assays were all performed in a buffer consisting of 25 mM Tris-Cl pH 8.0
CHEMBL5839407		None	321.43	0	0.73	BDBM378052	Cc1n[nH]c(C)c1C(=O)NC(C)C1CCN(C(=O)[C@H](C)N)CC1	IC50	'>'	100000	nM			756058	UO_0000065					0	CHEMBL5733491	SMYD3 Biochemical Assay: The assays were all performed in a buffer consisting of 25 mM Tris-Cl pH 8.0
CHEMBL5747911		None	319.41	0	0.49	BDBM378055	Cc1ncc(C(=O)NC(C)C2CCN(C(=O)[C@H](C)N)CC2)cn1	IC50	'>'	100000	nM			756061	UO_0000065					0	CHEMBL5733491	SMYD3 Biochemical Assay: The assays were all performed in a buffer consisting of 25 mM Tris-Cl pH 8.0
CHEMBL6055834		None	410.52	0	1.95	BDBM378505	N[C@H]1CC[C@H](C(=O)N2[C@@H]3CC[C@H]2C[C@@H](NC(=O)c2ccc4c(c2)CC(=O)N4)C3)CC1	IC50	'='	962	nM	6.02		756511	UO_0000065	14.66	0.27	4.07	5.76	0	CHEMBL5733491	SMYD3 Biochemical Assay: The assays were all performed in a buffer consisting of 25 mM Tris-Cl pH 8.0
CHEMBL6017995		None	233.31	0	1.39	BDBM378209	Cc1ccncc1C(=O)N[C@H]1CC[C@H](N)CC1	IC50	'>'	100000	nM			756215	UO_0000065					0	CHEMBL5733491	SMYD3 Biochemical Assay: The assays were all performed in a buffer consisting of 25 mM Tris-Cl pH 8.0
CHEMBL5948051		None	239.34	0	1.45	BDBM378218	Cc1nscc1C(=O)N[C@H]1CC[C@H](N)CC1	IC50	'>'	100000	nM			756224	UO_0000065					0	CHEMBL5733491	SMYD3 Biochemical Assay: The assays were all performed in a buffer consisting of 25 mM Tris-Cl pH 8.0
CHEMBL5872448		None	249.31	0	1.09	BDBM378224	COc1cccc(C(=O)N[C@H]2CC[C@H](N)CC2)n1	IC50	'>'	100000	nM			756230	UO_0000065					0	CHEMBL5733491	SMYD3 Biochemical Assay: The assays were all performed in a buffer consisting of 25 mM Tris-Cl pH 8.0
[truncated: 600 more rows]

## Sheet: Table S2
Molecule	ChEMBL	Smiles	IC50
[truncated: 1,483 more rows]

## Sheet: Table S3
Molecule	Smiles	IC50	pIC50	Bioactivity_Class
[truncated: 1,483 more rows]

## Sheet: Table S4
Smiles	Molecule ChEMBL ID
[truncated: 1,361 more rows]

## Sheet: Table S5
Smiles	pIC50	Molecule ChEMBL ID	Bioactivity_Class	MACCSFP16	MACCSFP19	MACCSFP32	MACCSFP33	MACCSFP51	MACCSFP55	MACCSFP57	MACCSFP58	MACCSFP60	MACCSFP61	MACCSFP62	MACCSFP64	MACCSFP65	MACCSFP67	MACCSFP71	MACCSFP73	MACCSFP75	MACCSFP77	MACCSFP81	MACCSFP82	MACCSFP84	MACCSFP85	MACCSFP86	MACCSFP88	MACCSFP89	MACCSFP90	MACCSFP91	MACCSFP93	MACCSFP94	MACCSFP95	MACCSFP97	MACCSFP98	MACCSFP102	MACCSFP106	MACCSFP107	MACCSFP108	MACCSFP109	MACCSFP112	MACCSFP115	MACCSFP116	MACCSFP122	MACCSFP124	MACCSFP125	MACCSFP127	MACCSFP130	MACCSFP131
[truncated: 1,483 more rows]
[truncated: 16 more columns]

[truncated: 18 more sheets: Table S6, Table S7, Table S8, Table S9, Table S10, Table S11, Table S12, Table S13, Table S14, Table S15, Table S16, Table S17, Table S18, Table S19, Table S20, Table S21, Table S22, Table S23]
